# Supplementary material for: Whole-Transcriptome Sequencing Analyses of Nuclear Antixoxidant-1 in Endothelial Cells: Role in Inflammation and Atherosclerosis
Source: MDPI journal article supplement (doi:10.3390/cells11182919), 2022-09-18
Supplement: s1 [file s1]

# Supplemental Tables (Tables S8 and S9)

## Whole-transcriptome sequencing analyses of Nuclear Antioxidant-1 in Endothelial Cells: Role in inflammation and Atherosclerosis

#Varadarajan Sudhahar<sup>1,2,6</sup>, #Yang Shi<sup>4</sup>, Jack H. Kaplan, Masuko Ushio-Fukai<sup>1,3</sup>,

\*Tohru Fukai,<sup>1,2,6</sup>

<sup>1</sup>Vascular Biology Center, <sup>2</sup>Department of Pharmacology and Toxicology, <sup>3</sup>Department of Medicine (Cardiology), and <sup>4</sup>Department of Population Health Science, Medical College of Georgia at Augusta University, Augusta, GA; <sup>5</sup>Department of Biochemistry and Molecular Genetics, University of Illinois College of Medicine, Chicago, IL, <sup>6</sup>Charlie Norwood Veterans Affairs Medical Center, Augusta, GA

# equally contributed first author

\*Address correspondence to:

Tohru Fukai, MD, PhD  
Vascular Biology Center  
Dept of Pharmacology & Toxicology  
Medical College of Georgia  
at Augusta University  
1460 Laney-Walker Blvd,  
Augusta, GA 30912, USA  
Email: tfukai@augusta.edu

**Supplementary Table S8:** Primer sequences utilized for ChIP–qPCR experiment

| Target gene | Position of binding site in genome | Primer sequence (5'-3')            |
|-------------|------------------------------------|------------------------------------|
| ADRB1       | Chr10:115801066-115801354          | Forward- TTCCGGTAACACCACTTGACA     |
|             |                                    | Reverse- GGGTGAGGCATAGGGAATGT      |
| CCN2        | Chr6:132273291-132273700           | Forward- CCCAAGGAACATGCAGCCT       |
|             |                                    | Reverse- CACCCAGGGAGAATAAAGCC      |
| CSF1        | Chr1:110451188-110451436           | Forward- ACCACTCCTTTGGGGAAAGTC     |
|             |                                    | Reverse- GGCCTGAAGACAGTAAGTGC      |
| IL5RA       | Chr3: 3133776-3134106              | Forward- GTTGGCTCCACTCACTCCAG      |
|             |                                    | Reverse- TTCTTCTAATGCTATCTTTCCCCAC |
| PIM1        | Chr11:37140611- 37140991           | Forward- CCACTCTCCTTAGCCCAGAG      |
|             |                                    | Reverse- GGCTATACACTCGGGTCCCT      |
| MDM2        | Chr12: 69201981-69202226           | Forward- TGTGTGTCGGAAAGATGGAGC     |
|             |                                    | Reverse- CAGGATCTCGGTCAGAGGGG      |
| CD137       | Chr1:8000546-8000923               | Forward- ATCACTCTTCCCCCTT TAGCTG   |
|             |                                    | Reverse- TTTGCTCCCTTTGCCCATTC      |

**Supplementary Table S9: Primers used for qPCR**

| Gene target       | Primer sequence (5'-3') |
|-------------------|-------------------------|
| CDC25A - Forward  | TCTGGACAGCTCCTCTCGTCAT  |
| CDC25A - Reverse  | ACTTCCAGGTGGAGACTCCTCT  |
| CREBBP - Forward  | AGTAACGGCACAGCCTCTCAGT  |
| CREBBP - Reverse  | CCTGTCGATACAGTGCTTCTAGG |
| CDC45 - Forward   | TGGATGCTGTCCAAGGACCTGA  |
| CDC45 - Reverse   | CAGGACACCAACATCAGTCACG  |
| TRAF1 - Forward   | CGATGGCACTTTCCTGTGGAAG  |
| TRAF1 - Reverse   | TACAGCCGCAGGCACAACCTTGT |
| CSF1 - Forward    | TGAGACACCTCTCCAGTTGCTG  |
| CSF1 - Reverse    | GCAATCAGGCTTGGTCACCACA  |
| MAP3K14 - Forward | GGAATACCTCCACTCACGAAGG  |
| MAP3K14 - Reverse | CTGTGAGCAAGGACTTTCACAG  |
| SESN2 - Forward   | AGATGGAGAGCCGCTTTGAGCT  |
| SESN2 - Reverse   | CCGAGTGAAGTCCTCATATCCG  |
| MDM2 - Forward    | TGTTTGGCGTGCCAAGCTTCTC  |
| MDM2 - Reverse    | CACAGATGTACCTGAGTCCGATG |
| GTSE1 - Forward   | CTCTACCAGCAATCTCGCAAGG  |
| GTSE1 - Reverse   | GACTTGCTGATGTTTGACAGAGG |
| TP73 - Forward    | CATGGAGACGAGGACACGTA    |
| TP73 - Reverse    | TGCCGATAGGAGTCCACCAAGT  |
| TAZ - Forward     | GAGGACTTCCTCAGCAATGTGG  |
| TAZ - Reverse     | CGTTTGTTCCTGGAAGACAGTCA |
| FZD5 - Forward    | TGGAACGCTTCCGCTATCCTGA  |
| FZD5 - Reverse    | GGTCTCGTAGTGGATGTGGTTG  |
| ADRB1 - Forward   | TTCCTGCCCATCCTCATGCACT  |
| ADRB1 - Reverse   | GTAGAAGGAGACTACGGACGAG  |
| CCN2 - Forward    | CTTGCGAAGCTGACCTGGAAGA  |
| CCN2 - Reverse    | CCGTCGGTACATACTCCACAGA  |
| PIM1 - Forward    | TCTACTCAGGCATCCGCGTCTC  |
| PIM1 - Reverse    | CTTCAGCAGGACCACTTCCATG  |
| LMO2 - Forward    | GCGCCTCTACTACAACTGGGC   |
| LMO2 - Reverse    | CTCATAGGCACGAATCCGCTTG  |
| ADIPOQ - Forward  | CAGGCCGTGATGGCAGAGATG   |
| ADIPOQ - Reverse  | GGTTTCACCGATGTCTCCCTTAG |
| ERBB3 - Forward   | CTATGAGGCGATACTTGAACGG  |
| ERBB3 - Reverse   | GCACAGTTCCAAAGACACCCGA  |
| CD137 - Forward   | TCTTCCTCACGCTCCGTTTCTC  |
| CD137 - Reverse   | TGGAAATCGGCAGCTACAGCCA  |
| DUSP16 - Forward  | TGCCAGCGAGATGTCCTCAACA  |
| DUSP16 - Reverse  | ACACGCAGGAAATGAGACTCGG  |
| TNFSF11 - Forward | GCCTTTCAAGGAGCTGTGCAAAA |
| TNFSF11 - Reverse | GAGCAAAAGGCTGAGCTTCAAGC |

|                 |                        |
|-----------------|------------------------|
| MAFA - Forward  | GCTTCAGCAAGGAGGAGGTCAT |
| MAFA - Reverse  | TCTGGAGTTGGCACTTCTCGCT |
| IL5RA - Forward | TGACTGGCTTGCGGTGCTTGTT |
| IL5RA - Reverse | CTGCTGTGACATTCAGTGGAGG |
| Atox1 - Forward | CTTCTTGTTGGGCAGGTCAATG |
| Atox1 - Reverse | CAGTCATGCCGAAGCACGAG   |
