# Supplementary material for: Whole-Transcriptome Sequencing Analyses of Nuclear Antixoxidant-1 in Endothelial Cells: Role in Inflammation and Atherosclerosis
Source: Cells. 2022 Sep 18;11(18):2919. doi: 10.3390/cells11182919 (PMC9496719; doi:10.3390/cells11182919)
Supplement: Supplementary file 1 [file cells-11-02919-s001.zip]

Archive with 9 entries (9 files):
- cells-1822705-Supplementary figures.pdf
- Supplemental Table 8 and 9 - 08-27-2022.pdf
- Supplementary Table S1 - Down regulated -chipseq_rnaseq_overlap_genes.xlsx
- Supplementary Table S2 - Up regulated -chipseq_rnaseq_overlap_genes.xlsx
- Supplementary Table S3 - Atox1_GO_BP pathway.xlsx
- Supplementary Table S4 - Atox1_GO_CC pathway.xlsx
- Supplementary Table S5 - Atox1_GO_MF pathway.xlsx
- Supplementary Table S6 - Atox1_kegg pathways.xlsx
- Supplementary Table S7 - Atox1 direct target genes.xlsx
