# Supplementary material for: Whole-Transcriptome Sequencing Analyses of Nuclear Antixoxidant-1 in Endothelial Cells: Role in Inflammation and Atherosclerosis
Source: Cells. 2022 Sep 18;11(18):2919. doi: 10.3390/cells11182919 (PMC9496719; doi:10.3390/cells11182919)
Supplement: Supplementary file 1 [file cells-11-02919-s001.zip › Supplementary Table S1 - Down regulated -chipseq_rnaseq_overlap_genes.xlsx]

## Sheet: Dowchipseq_rnaseq_overlap_genes
Supplementary Table S1. Related to Figure 4A. Gene Downregulated Following Nuclear Atox1 Induction
ensembl_gene_id	external_gene_name	baseMean	log2FoldChange	lfcSE	stat	foldchange	pvalue	padj	entrezgene	gene_biotype	external_gene_source	transcript_count	description	sample.ad_null_1	sample.ad_null_2	sample.ad_null_3	sample.ad_atox1_wt_1	sample.ad_atox1_wt_2	sample.ad_atox1_wt_3	sample.ad_atox1_nls_1	sample.ad_atox1_nls_2	sample.ad_atox1_nls_3
ENSG00000005187	ACSM3	346.81	-7.70302	0.619598	-12.4323	0.00479911	1.75e-35	1.49e-33	6296	protein_coding	HGNC Symbol	15	acyl-CoA synthetase medium chain family member 3 [Source:HGNC Symbol;Acc:HGNC:10522]	17.2827	18.0559	18.0077	0.327238	0.198545	0.0613199	0.0395546	0.117111	0
ENSG00000131386	GALNT15	402.44	-6.02098	0.96929	-6.21174	0.0153994	5.24e-10	4.24e-09	117248	protein_coding	HGNC Symbol	7	polypeptide N-acetylgalactosaminyltransferase 15 [Source:HGNC Symbol;Acc:HGNC:21531]	47.2198	9.77276	5.84278	0.670058	0.595634	0.0817598	0.29666	0.117111	0.127295
ENSG00000165507	DEPP1	7728.94	-5.70461	1.17927	-4.83739	0.0191753	1.32e-06	6.49e-06	11067	protein_coding	HGNC Symbol	3	DEPP1, autophagy regulator [Source:HGNC Symbol;Acc:HGNC:23355]	461.466	352.261	363.716	28.2983	15.1291	9.21842	13.0926	0.614834	0.78923
ENSG00000158164	TMSB15A	26.5209	-5.49853	1.12827	-4.87341	0.0221196	1.1e-06	5.47e-06	11013	protein_coding	HGNC Symbol	1	thymosin beta 15a [Source:HGNC Symbol;Acc:HGNC:30744]	1.01482	1.44054	1.51575	0.296072	0.317671	0.367919	0	0.0585556	0
ENSG00000004799	PDK4	211.628	-5.42307	0.934784	-5.80141	0.0233073	6.58e-09	4.6e-08	5166	protein_coding	HGNC Symbol	5	pyruvate dehydrogenase kinase 4 [Source:HGNC Symbol;Acc:HGNC:8812]	16.1756	10.182	5.95937	10.5651	7.82266	4.10843	0.257105	0.175667	0
ENSG00000254535	PABPC4L	32.8735	-4.96617	0.918131	-5.409	0.0319915	6.34e-08	3.86e-07	132430	protein_coding	HGNC Symbol	1	poly(A) binding protein cytoplasmic 4 like [Source:HGNC Symbol;Acc:HGNC:31955]	2.27565	1.70246	1.02346	1.29337	1.37658	0.633639	0.0791092	0	0
ENSG00000157404	KIT	725.315	-4.9371	0.73438	-6.72281	0.0326426	1.78e-11	1.72e-10	3815	protein_coding	HGNC Symbol	4	KIT proto-oncogene receptor tyrosine kinase [Source:HGNC Symbol;Acc:HGNC:6342]	31.2441	36.6028	40.6274	0.9038	0.701524	0.16352	1.58218	0.175667	0.381885
ENSG00000268223	ARL14EPL	4.39802	-4.7997	1.64326	-2.92084	0.0359043	0.00349094	0.00867506	644100	protein_coding	HGNC Symbol	2	ADP ribosylation factor like GTPase 14 effector protein like [Source:HGNC Symbol;Acc:HGNC:44201]	0.338273	0.180068	0.168417	0.124662	0.132363	0.16352	0	0	0
ENSG00000271447	MMP28	175.994	-4.72111	1.29744	-3.63879	0.0379143	0.000273925	0.000860651	79148	protein_coding	HGNC Symbol	7	matrix metallopeptidase 28 [Source:HGNC Symbol;Acc:HGNC:14366]	9.19487	8.5614	8.53745	1.48036	1.37658	0.940238	0.573542	0	0.0509181
ENSG00000010319	SEMA3G	379.819	-4.63465	0.332081	-13.9564	0.040256	2.88e-44	4.63e-42	56920	protein_coding	HGNC Symbol	3	semaphorin 3G [Source:HGNC Symbol;Acc:HGNC:30400]	13.6847	21.6408	20.9355	1.16871	1.16479	0.776719	0.613096	0.351334	0.305508
ENSG00000156509	FBXO43	13.5576	-4.49894	1.19397	-3.76805	0.0442265	0.000164527	0.000541153	286151	protein_coding	HGNC Symbol	3	F-box protein 43 [Source:HGNC Symbol;Acc:HGNC:28521]	0.691922	0.671161	0.634803	0.0934965	0.0794178	0	0	0	0.0509181
ENSG00000175264	CHST1	879.849	-4.37587	0.880843	-4.96782	0.0481651	6.77e-07	3.49e-06	8534	protein_coding	HGNC Symbol	3	carbohydrate sulfotransferase 1 [Source:HGNC Symbol;Acc:HGNC:1969]	18.4513	47.4233	62.69	7.63555	9.27865	6.68387	2.90726	0.497723	0.432804
ENSG00000165424	ZCCHC24	692.369	-4.34267	0.260671	-16.6596	0.0492862	2.58e-62	7.56e-60	219654	protein_coding	HGNC Symbol	2	zinc finger CCHC-type containing 24 [Source:HGNC Symbol;Acc:HGNC:26911]	36.5027	33.6235	32.0381	22.2366	28.0874	18.0076	0.830647	0.673389	1.27295
ENSG00000163751	CPA3	58.1082	-4.30947	0.627148	-6.87153	0.0504337	6.35e-12	6.55e-11	1359	protein_coding	HGNC Symbol	2	carboxypeptidase A3 [Source:HGNC Symbol;Acc:HGNC:2298]	3.9824	2.35725	2.34488	0.124662	0.211781	0.12264	0.177996	0	0.0509181
ENSG00000099617	EFNA2	31.7288	-4.20415	0.798688	-5.26381	0.0542533	1.41e-07	8.15e-07	1943	protein_coding	HGNC Symbol	1	ephrin A2 [Source:HGNC Symbol;Acc:HGNC:3222]	0.799554	1.91526	1.90441	0.140245	0.291199	0.306599	0.0593319	0.0292778	0.0509181
ENSG00000176532	PRR15	21.375	-4.10089	0.943174	-4.34796	0.0582787	1.37e-05	5.65e-05	222171	protein_coding	HGNC Symbol	2	proline rich 15 [Source:HGNC Symbol;Acc:HGNC:22310]	1.1532	0.818489	1.14005	2.8049	2.67373	2.39148	0	0	0.101836
ENSG00000154027	AK5	250.952	-4.0731	0.469652	-8.67261	0.0594119	4.22e-18	8.8e-17	26289	protein_coding	HGNC Symbol	13	adenylate kinase 5 [Source:HGNC Symbol;Acc:HGNC:365]	22.2645	7.64469	7.26785	0.498648	0.397089	0.14308	0.355991	0.468445	0.381885
ENSG00000109674	NEIL3	96.0818	-4.02357	0.547485	-7.3492	0.061487	1.99e-13	2.5e-12	55247	protein_coding	HGNC Symbol	2	nei like DNA glycosylase 3 [Source:HGNC Symbol;Acc:HGNC:24573]	4.87421	4.58354	4.46953	0.545396	0.450034	0.286159	0.0395546	0.351334	0.101836
ENSG00000156968	MPV17L	8.06889	-3.92048	1.37385	-2.85365	0.0660415	0.00432202	0.0105238	255027	protein_coding	HGNC Symbol	3	MPV17 mitochondrial inner membrane protein like [Source:HGNC Symbol;Acc:HGNC:26827]	0.645794	0.311026	0.246148	0.0311655	0.0794178	0.0408799	0.0395546	0	0
ENSG00000164850	GPER1	105.38	-3.90372	0.442299	-8.82598	0.0668132	1.09e-18	2.47e-17	2852	protein_coding	HGNC Symbol	7	G protein-coupled estrogen receptor 1 [Source:HGNC Symbol;Acc:HGNC:4485]	3.93627	5.59846	5.73914	8.46144	9.78163	9.1571	0.29666	0.0585556	0.203672
ENSG00000175643	RMI2	103.749	-3.90132	0.387563	-10.0663	0.0669246	7.79e-24	2.93e-22	116028	protein_coding	HGNC Symbol	7	RecQ mediated genome instability 2 [Source:HGNC Symbol;Acc:HGNC:28349]	5.1356	4.79635	5.1432	1.46478	0.489743	0.817598	0.257105	0.175667	0.127295
ENSG00000162931	TRIM17	7.92533	-3.8819	1.32482	-2.93014	0.0678315	0.00338805	0.00845519	51127	protein_coding	HGNC Symbol	8	tripartite motif containing 17 [Source:HGNC Symbol;Acc:HGNC:13430]	0.399777	0.327396	0.440476	0.560979	1.17803	0.633639	0.0395546	0	0
ENSG00000178999	AURKB	726.311	-3.84627	0.399534	-9.62691	0.0695274	6.16e-22	1.86e-20	9212	protein_coding	HGNC Symbol	14	aurora kinase B [Source:HGNC Symbol;Acc:HGNC:11390]	32.4896	33.9018	38.425	2.69582	3.0973	3.45435	0.553765	1.78595	1.553
ENSG00000254585	MAGEL2	7.54169	-3.82388	1.40207	-2.72731	0.0706152	0.0063853	0.0148436	54551	protein_coding	HGNC Symbol	2	MAGE family member L2 [Source:HGNC Symbol;Acc:HGNC:6814]	0.184513	0.523833	0.388655	0.062331	0.119127	0.0408799	0.0395546	0	0
ENSG00000175063	UBE2C	939.063	-3.80217	0.273675	-13.893	0.0716859	6.99e-44	1.1e-41	11065	protein_coding	HGNC Symbol	8	ubiquitin conjugating enzyme E2 C [Source:HGNC Symbol;Acc:HGNC:15937]	50.3104	40.5152	44.8896	5.4228	5.0298	5.60055	1.26575	2.04945	1.9858
ENSG00000154262	ABCA6	487.614	-3.78568	0.74731	-5.06574	0.07251	4.07e-07	2.18e-06	23460	protein_coding	HGNC Symbol	7	ATP binding cassette subfamily A member 6 [Source:HGNC Symbol;Acc:HGNC:36]	39.1628	17.5484	14.5486	1.88551	1.72072	0.429239	1.68107	0.234222	1.04382
ENSG00000154839	SKA1	250.971	-3.76601	0.402789	-9.34984	0.0735051	8.78e-21	2.49e-19	220134	protein_coding	HGNC Symbol	5	spindle and kinetochore associated complex subunit 1 [Source:HGNC Symbol;Acc:HGNC:28109]	13.3618	11.0823	11.6856	1.99459	2.10457	1.96224	0.197773	0.644112	0.611017
ENSG00000100027	YPEL1	139.972	-3.75658	0.474451	-7.91775	0.073987	2.42e-15	3.81e-14	29799	protein_coding	HGNC Symbol	3	yippee like 1 [Source:HGNC Symbol;Acc:HGNC:12845]	6.71933	6.84257	6.72373	1.38687	1.36334	0.470119	0.632874	0.0585556	0.152754
ENSG00000117650	NEK2	254.437	-3.68877	0.862954	-4.27458	0.077548	1.91e-05	7.63e-05	4751	protein_coding	HGNC Symbol	5	NIMA related kinase 2 [Source:HGNC Symbol;Acc:HGNC:7745]	13.3618	11.0169	12.1908	1.55828	0.992723	1.18552	0.0791092	0.702667	0.687394
ENSG00000157456	CCNB2	956.292	-3.65882	0.367084	-9.96724	0.0791746	2.12e-23	7.51e-22	9133	protein_coding	HGNC Symbol	5	cyclin B2 [Source:HGNC Symbol;Acc:HGNC:1580]	42.6839	44.7713	49.3592	3.88011	3.65322	3.33171	0.969088	2.635	2.18948
ENSG00000158163	DZIP1L	42.6358	-3.63823	0.562847	-6.46398	0.0803126	1.02e-10	9.05e-10	199221	protein_coding	HGNC Symbol	9	DAZ interacting zinc finger protein 1 like [Source:HGNC Symbol;Acc:HGNC:26551]	1.92201	2.12807	2.08578	0.872634	0.820651	0.551879	0.158218	0.0585556	0.0509181
ENSG00000131477	RAMP2	563.252	-3.6209	0.975296	-3.71262	0.081283	0.000205127	0.00066093	10266	protein_coding	HGNC Symbol	6	receptor activity modifying protein 2 [Source:HGNC Symbol;Acc:HGNC:9844]	42.2534	22.3284	16.9194	20.3199	15.3144	7.39927	3.4017	0.322056	0.381885
ENSG00000165821	SALL2	255.278	-3.5848	0.393559	-9.10868	0.0833425	8.34e-20	2.17e-18	6297	protein_coding	HGNC Symbol	7	spalt like transcription factor 2 [Source:HGNC Symbol;Acc:HGNC:10526]	16.2217	12.3919	8.16175	3.9736	4.27533	2.4528	0.949311	0.204945	0.560099
ENSG00000182568	SATB1	289.829	-3.56608	0.352423	-10.1188	0.0844309	4.56e-24	1.74e-22	6304	protein_coding	HGNC Symbol	18	SATB homeobox 1 [Source:HGNC Symbol;Acc:HGNC:10541]	18.7126	12.5556	10.2605	3.36587	5.26805	2.57544	0.494433	0.907612	0.53464
ENSG00000131634	TMEM204	474.861	-3.56258	0.283236	-12.5781	0.0846365	2.79e-36	2.63e-34	79652	protein_coding	HGNC Symbol	2	transmembrane protein 204 [Source:HGNC Symbol;Acc:HGNC:14158]	22.9564	23.2287	21.6869	13.1363	12.8922	10.1382	1.54263	0.468445	1.19657
ENSG00000167861	HID1	1734.83	-3.55505	0.219739	-16.1785	0.0850794	7.15e-59	1.73e-56	283987	protein_coding	HGNC Symbol	14	HID1 domain containing [Source:HGNC Symbol;Acc:HGNC:15736]	97.6994	76.0049	74.7254	10.0509	9.63603	5.43703	6.0123	2.83995	3.13146
ENSG00000075218	GTSE1	790.171	-3.52921	0.337494	-10.4571	0.0866169	1.36e-25	6.2e-24	51512	protein_coding	HGNC Symbol	4	G2 and S-phase expressed 1 [Source:HGNC Symbol;Acc:HGNC:13698]	37.4407	36.3737	38.5546	3.05422	3.00464	2.96379	1.00864	2.45934	1.78213
ENSG00000274180	NATD1	681.869	-3.51839	0.392786	-8.95752	0.0872688	3.32e-19	8.02e-18	256302	protein_coding	HGNC Symbol	1	N-acetyltransferase domain containing 1 [Source:HGNC Symbol;Acc:HGNC:30770]	39.7932	30.8243	26.9856	7.79138	7.80942	4.78295	3.24348	0.614834	1.1202
ENSG00000143228	NUF2	229.71	-3.46755	0.430364	-8.05726	0.0903988	7.8e-16	1.29e-14	83540	protein_coding	HGNC Symbol	12	NDC80 kinetochore complex component NUF2 [Source:HGNC Symbol;Acc:HGNC:14621]	11.9164	10.935	9.69046	1.12196	1.12509	0.654079	0.197773	0.761223	0.636476
ENSG00000118407	FILIP1	585.121	-3.46219	1.03018	-3.36075	0.0907356	0.000777298	0.00222929	27145	protein_coding	HGNC Symbol	4	filamin A interacting protein 1 [Source:HGNC Symbol;Acc:HGNC:21015]	47.7426	20.1512	16.2717	2.60232	2.87228	1.08332	3.97524	0.409889	0.356426
ENSG00000064042	LIMCH1	1332.43	-3.45763	0.731014	-4.7299	0.091023	2.25e-06	1.06e-05	22998	protein_coding	HGNC Symbol	22	LIM and calponin homology domains 1 [Source:HGNC Symbol;Acc:HGNC:29191]	92.0256	56.1811	42.4282	28.906	44.249	19.3975	7.21872	1.11256	2.06218
ENSG00000137875	BCL2L10	11.0204	-3.45408	1.30583	-2.64512	0.0912471	0.00816619	0.0184407	10017	protein_coding	HGNC Symbol	2	BCL2 like 10 [Source:HGNC Symbol;Acc:HGNC:993]	1.18396	0.180068	0.259103	0.0934965	0.0661815	0.0408799	0.0791092	0	0
ENSG00000182575	NXPH3	84.1954	-3.41489	0.686585	-4.97373	0.0937598	6.57e-07	3.4e-06	11248	protein_coding	HGNC Symbol	3	neurexophilin 3 [Source:HGNC Symbol;Acc:HGNC:8077]	7.19599	2.58643	2.37079	1.32453	1.07214	0.654079	0.51421	0.117111	0.025459
ENSG00000136122	BORA	93.0218	-3.39492	0.399625	-8.49527	0.0950663	1.97e-17	3.78e-16	79866	protein_coding	HGNC Symbol	10	bora, aurora kinase A activator [Source:HGNC Symbol;Acc:HGNC:24724]	4.76657	4.46895	3.8995	1.01288	1.48247	1.18552	0.257105	0.351334	0.101836
ENSG00000166851	PLK1	2597.84	-3.34004	0.31918	-10.4644	0.0987523	1.26e-25	5.8e-24	5347	protein_coding	HGNC Symbol	9	polo like kinase 1 [Source:HGNC Symbol;Acc:HGNC:9077]	111.384	115.669	138.089	9.11591	9.49043	8.70742	3.99502	8.02212	7.28128
ENSG00000176046	NUPR1	52.2528	-3.22791	0.84667	-3.81248	0.106734	0.000137582	0.000460832	26471	protein_coding	HGNC Symbol	3	nuclear protein 1, transcriptional regulator [Source:HGNC Symbol;Acc:HGNC:29990]	5.98128	0.867598	0.660713	2.75815	0.35738	0.286159	0.21755	0.175667	0.0509181
ENSG00000156970	BUB1B	695.797	-3.18206	0.319491	-9.95976	0.110181	2.29e-23	8.02e-22	701	protein_coding	HGNC Symbol	11	BUB1 mitotic checkpoint serine/threonine kinase B [Source:HGNC Symbol;Acc:HGNC:1149]	27.4155	31.4463	37.7254	2.78931	2.77962	2.555	1.26575	2.108	2.39315
ENSG00000086991	NOX4	654.324	-3.13148	0.276326	-11.3326	0.114112	9.05e-30	5.55e-28	50507	protein_coding	HGNC Symbol	15	NADPH oxidase 4 [Source:HGNC Symbol;Acc:HGNC:7891]	23.0948	32.4122	35.0826	4.55016	4.54005	2.53456	2.88749	1.22967	1.75667
ENSG00000136842	TMOD1	49.1893	-3.12676	0.665867	-4.69577	0.114486	2.66e-06	1.24e-05	7111	protein_coding	HGNC Symbol	3	tropomodulin 1 [Source:HGNC Symbol;Acc:HGNC:11871]	4.18228	1.62061	1.16596	1.62061	1.12509	0.817598	0.276882	0.117111	0.0509181
ENSG00000174059	CD34	3043.92	-3.12214	0.900697	-3.46636	0.114853	0.000527562	0.00156931	947	protein_coding	HGNC Symbol	4	CD34 molecule [Source:HGNC Symbol;Acc:HGNC:1662]	225.797	108.564	92.9015	25.805	14.507	5.82539	24.0888	3.22056	2.97871
ENSG00000166402	TUB	130.772	-3.09509	0.366029	-8.45585	0.117027	2.77e-17	5.23e-16	7275	protein_coding	HGNC Symbol	3	tubby bipartite transcription factor [Source:HGNC Symbol;Acc:HGNC:12406]	6.31955	5.87675	5.94642	0.4519	0.807415	0.531439	0.435101	0.146389	0.585558
ENSG00000168078	PBK	438.93	-3.09413	0.463503	-6.67553	0.117105	2.46e-11	2.33e-10	55872	protein_coding	HGNC Symbol	4	PDZ binding kinase [Source:HGNC Symbol;Acc:HGNC:18282]	20.2964	19.1363	21.2594	1.68294	1.62807	1.28772	0.435101	2.108	1.22203
ENSG00000089041	P2RX7	29.6331	-3.0931	0.678115	-4.56132	0.117188	5.08e-06	2.24e-05	5027	protein_coding	HGNC Symbol	13	purinergic receptor P2X 7 [Source:HGNC Symbol;Acc:HGNC:8537]	2.15265	1.17862	0.80322	4.36317	3.00464	2.1462	0.0791092	0.0878334	0.101836
ENSG00000157214	STEAP2	70.4913	-3.09063	0.741797	-4.16641	0.117389	3.09e-05	0.000117438	261729	protein_coding	HGNC Symbol	10	STEAP2 metalloreductase [Source:HGNC Symbol;Acc:HGNC:17885]	6.79621	1.88252	1.33438	0.701224	0.622106	0.490559	0.51421	0.0585556	0.101836
ENSG00000158402	CDC25C	137.134	-3.0888	0.447473	-6.90276	0.117538	5.1e-12	5.32e-11	995	protein_coding	HGNC Symbol	10	cell division cycle 25C [Source:HGNC Symbol;Acc:HGNC:1727]	7.16524	5.14011	6.646	0.919382	0.489743	0.838038	0.276882	0.761223	0.203672
ENSG00000117394	SLC2A1	2365.07	-3.08818	0.417402	-7.39856	0.117589	1.38e-13	1.77e-12	6513	protein_coding	HGNC Symbol	9	solute carrier family 2 member 1 [Source:HGNC Symbol;Acc:HGNC:11005]	50.7871	122.806	150.552	17.7955	18.2661	16.5359	4.43012	8.81262	7.3322
ENSG00000110077	MS4A6A	117.873	-3.0821	0.510077	-6.04242	0.118085	1.52e-09	1.15e-08	64231	protein_coding	HGNC Symbol	21	membrane spanning 4-domains A6A [Source:HGNC Symbol;Acc:HGNC:13375]	9.14875	3.71594	3.71813	2.83606	1.98545	1.06288	0.692206	0.2635	0.152754
ENSG00000072952	MRVI1	32.4473	-3.07395	0.756977	-4.06082	0.118755	4.89e-05	0.000178739	10335	protein_coding	HGNC Symbol	17	murine retrovirus integration site 1 homolog [Source:HGNC Symbol;Acc:HGNC:7237]	2.92145	0.75301	0.906861	0.467483	0.423562	0.22484	0.138441	0.0292778	0.127295
ENSG00000131389	SLC6A6	1112.64	-3.04888	0.281773	-10.8203	0.120836	2.76e-27	1.4e-25	6533	protein_coding	HGNC Symbol	12	solute carrier family 6 member 6 [Source:HGNC Symbol;Acc:HGNC:11052]	37.9019	57.0487	58.0391	34.656	35.0233	24.7937	5.37943	2.16656	3.05508
ENSG00000071246	VASH1	1949.38	-3.0418	0.262473	-11.589	0.12143	4.68e-31	3.1e-29	22846	protein_coding	HGNC Symbol	5	vasohibin 1 [Source:HGNC Symbol;Acc:HGNC:19964]	98.5451	90.0993	81.0086	23.8728	25.7181	16.0249	10.2051	3.63045	5.01543
ENSG00000099864	PALM	1594	-3.0399	0.194963	-15.5922	0.12159	8.23e-55	1.78e-52	5064	protein_coding	HGNC Symbol	11	paralemmin [Source:HGNC Symbol;Acc:HGNC:8594]	63.826	79.4262	76.1375	112.04	101.297	74.5037	5.77497	3.86467	5.24456
ENSG00000120885	CLU	60786.9	-3.02054	0.707026	-4.27219	0.123233	1.94e-05	7.7e-05	1191	protein_coding	HGNC Symbol	17	clusterin [Source:HGNC Symbol;Acc:HGNC:2095]	4865.16	2042.78	1581.55	1542.35	1172.42	872.459	387.121	96.1483	130.987
ENSG00000156804	FBXO32	227.264	-3.0195	0.290285	-10.4018	0.123321	2.43e-25	1.07e-23	114907	protein_coding	HGNC Symbol	6	F-box protein 32 [Source:HGNC Symbol;Acc:HGNC:16731]	12.4546	8.18489	10.8564	4.33201	3.04435	2.65719	1.02842	0.468445	0.661935
ENSG00000069702	TGFBR3	611.823	-3.01109	0.363788	-8.27705	0.124042	1.26e-16	2.25e-15	7049	protein_coding	HGNC Symbol	11	transforming growth factor beta receptor 3 [Source:HGNC Symbol;Acc:HGNC:11774]	47.1891	20.9697	17.1008	14.8659	16.2939	9.60678	2.13595	2.22511	1.45116
ENSG00000136982	DSCC1	62.1785	-2.98673	0.428489	-6.97038	0.126155	3.16e-12	3.38e-11	79075	protein_coding	HGNC Symbol	2	DNA replication and sister chromatid cohesion 1 [Source:HGNC Symbol;Acc:HGNC:24453]	3.16747	2.53732	2.889	0.296072	0.807415	0.449679	0.276882	0.0878334	0.229131
ENSG00000168077	SCARA3	11288.5	-2.98306	0.227007	-13.1408	0.126476	1.92e-39	2.25e-37	51435	protein_coding	HGNC Symbol	2	scavenger receptor class A member 3 [Source:HGNC Symbol;Acc:HGNC:19000]	727.733	426.22	408.515	85.9545	64.2226	57.8247	47.4458	31.5615	31.4674
ENSG00000142405	NLRP12	33.3832	-2.97544	0.57156	-5.20583	0.127146	1.93e-07	1.09e-06	91662	protein_coding	HGNC Symbol	6	NLR family pyrin domain containing 12 [Source:HGNC Symbol;Acc:HGNC:22938]	1.64524	1.75157	1.20483	0.0311655	0.0397089	0.02044	0.158218	0.117111	0.0509181
ENSG00000162944	RFTN2	151.426	-2.94025	0.397593	-7.39511	0.130286	1.41e-13	1.81e-12	130132	protein_coding	HGNC Symbol	4	raftlin family member 2 [Source:HGNC Symbol;Acc:HGNC:26402]	10.5172	6.13867	4.31407	5.20464	6.75052	4.33327	0.73176	0.380611	0.407345
ENSG00000136960	ENPP2	69.8196	-2.92972	0.692824	-4.22867	0.13124	2.35e-05	9.21e-05	5168	protein_coding	HGNC Symbol	9	ectonucleotide pyrophosphatase/phosphodiesterase 2 [Source:HGNC Symbol;Acc:HGNC:3357]	5.47387	2.19355	2.03396	0.483065	0.25149	0.12264	0.435101	0.292778	0
ENSG00000174080	CTSF	495.698	-2.91594	0.284591	-10.2461	0.1325	1.23e-24	4.99e-23	8722	protein_coding	HGNC Symbol	9	cathepsin F [Source:HGNC Symbol;Acc:HGNC:2531]	32.0744	19.2836	16.9454	6.01494	4.68565	3.57699	2.1755	1.20039	1.65484
ENSG00000117399	CDC20	3266.28	-2.90984	0.364135	-7.99109	0.133061	1.34e-15	2.17e-14	991	protein_coding	HGNC Symbol	4	cell division cycle 20 [Source:HGNC Symbol;Acc:HGNC:1723]	128.328	145.757	170.736	9.038	9.25218	9.34106	5.61675	14.6389	11.1765
ENSG00000095596	CYP26A1	9.76719	-2.89341	1.09122	-2.65155	0.134585	0.00801239	0.0181383	1592	protein_coding	HGNC Symbol	6	cytochrome P450 family 26 subfamily A member 1 [Source:HGNC Symbol;Acc:HGNC:2603]	0.830306	0.229177	0.285014	0.0934965	0.0529452	0	0.0197773	0.0292778	0.0509181
ENSG00000074527	NTN4	9127.68	-2.87374	0.272979	-10.5273	0.136433	6.47e-26	3.05e-24	59277	protein_coding	HGNC Symbol	7	netrin 4 [Source:HGNC Symbol;Acc:HGNC:13658]	526.014	370.268	352.95	50.1765	40.7149	32.1112	54.2887	22.4853	21.8693
ENSG00000079691	CARMIL1	354.017	-2.86526	0.825403	-3.47135	0.137236	0.000517845	0.00154376	55604	protein_coding	HGNC Symbol	5	capping protein regulator and myosin 1 linker 1 [Source:HGNC Symbol;Acc:HGNC:21581]	20.4348	14.5691	13.4604	6.71617	6.63139	3.82227	3.2237	0.380611	0.483722
ENSG00000011426	ANLN	1922.26	-2.85279	0.358701	-7.95312	0.138428	1.82e-15	2.9e-14	54443	protein_coding	HGNC Symbol	13	anillin actin binding protein [Source:HGNC Symbol;Acc:HGNC:14082]	77.895	89.1989	93.5363	18.7149	20.4766	16.2498	3.46103	8.95901	6.7721
ENSG00000182022	CHST15	1034.12	-2.85126	0.250133	-11.399	0.138575	4.23e-30	2.61e-28	51363	protein_coding	HGNC Symbol	5	carbohydrate sulfotransferase 15 [Source:HGNC Symbol;Acc:HGNC:18137]	58.7365	42.7251	39.8112	11.4377	13.6334	6.97003	4.66744	2.22511	4.02253
ENSG00000137474	MYO7A	99.5353	-2.8405	0.56042	-5.06852	0.139612	4.01e-07	2.15e-06	4647	protein_coding	HGNC Symbol	11	myosin VIIA [Source:HGNC Symbol;Acc:HGNC:7606]	7.0576	4.10881	2.56512	2.66465	2.87228	2.4528	0.751538	0.0878334	0.25459
ENSG00000121858	TNFSF10	950.209	-2.83745	1.07968	-2.62805	0.139908	0.00858764	0.0192495	8743	protein_coding	HGNC Symbol	6	TNF superfamily member 10 [Source:HGNC Symbol;Acc:HGNC:11925]	82.5079	27.2884	21.4278	15.0841	11.7538	7.64455	9.414	0.673389	1.27295
ENSG00000183856	IQGAP3	1026.31	-2.83455	0.323995	-8.74876	0.140189	2.16e-18	4.67e-17	128239	protein_coding	HGNC Symbol	4	IQ motif containing GTPase activating protein 3 [Source:HGNC Symbol;Acc:HGNC:20669]	42.3149	45.2952	51.3024	3.39704	3.2826	2.77983	2.29417	4.97723	3.2333
ENSG00000111665	CDCA3	508.802	-2.82614	0.386369	-7.31462	0.141009	2.58e-13	3.16e-12	83461	protein_coding	HGNC Symbol	12	cell division cycle associated 3 [Source:HGNC Symbol;Acc:HGNC:14624]	21.0037	22.2465	25.5217	3.33471	3.44144	4.35371	0.830647	2.31295	2.03672
ENSG00000182253	SYNM	253.113	-2.82187	0.261431	-10.7939	0.141427	3.68e-27	1.85e-25	23336	protein_coding	HGNC Symbol	4	synemin [Source:HGNC Symbol;Acc:HGNC:24466]	9.61003	11.4588	13.1106	17.8111	28.961	19.7654	0.988865	0.878334	0.840148
ENSG00000179855	GIPC3	106.88	-2.81501	0.338379	-8.31909	0.142101	8.86e-17	1.6e-15	126326	protein_coding	HGNC Symbol	3	GIPC PDZ domain containing family member 3 [Source:HGNC Symbol;Acc:HGNC:18183]	5.73526	4.35436	4.41771	14.4608	12.3098	8.91182	0.435101	0.468445	0.25459
ENSG00000182010	RTKN2	34.7054	-2.81421	0.596706	-4.71624	0.14218	2.4e-06	1.13e-05	219790	protein_coding	HGNC Symbol	3	rhotekin 2 [Source:HGNC Symbol;Acc:HGNC:19364]	2.1834	1.14588	1.45098	0.124662	0.10589	0.12264	0.237328	0.0585556	0.0763771
ENSG00000065675	PRKCQ	25.675	-2.80946	0.744875	-3.77173	0.142648	0.000162121	0.000533882	5588	protein_coding	HGNC Symbol	4	protein kinase C theta [Source:HGNC Symbol;Acc:HGNC:9410]	1.52223	0.900338	1.04937	0.560979	1.16479	0.899358	0.0791092	0.204945	0
ENSG00000118507	AKAP7	49.6151	-2.80044	0.555407	-5.04214	0.143544	4.6e-07	2.45e-06	9465	protein_coding	HGNC Symbol	9	A-kinase anchoring protein 7 [Source:HGNC Symbol;Acc:HGNC:377]	2.53705	2.34088	1.89145	1.29337	1.00596	0.408799	0.276882	0	0.25459
ENSG00000090889	KIF4A	623.03	-2.79783	0.317684	-8.80696	0.143804	1.29e-18	2.9e-17	24137	protein_coding	HGNC Symbol	2	kinesin family member 4A [Source:HGNC Symbol;Acc:HGNC:13339]	25.8164	28.0414	30.1596	2.63349	3.40173	2.63675	1.38441	2.78139	2.36769
ENSG00000135643	KCNMB4	89.3252	-2.79377	0.415239	-6.7281	0.144208	1.72e-11	1.66e-10	27345	protein_coding	HGNC Symbol	2	potassium calcium-activated channel subfamily M regulatory beta subunit 4 [Source:HGNC Symbol;Acc:HGNC:6289]	3.721	4.5508	3.83473	1.05963	0.992723	0.327039	0.533987	0.351334	0.101836
ENSG00000142945	KIF2C	676.334	-2.78997	0.360145	-7.74678	0.144589	9.43e-15	1.4e-13	11004	protein_coding	HGNC Symbol	8	kinesin family member 2C [Source:HGNC Symbol;Acc:HGNC:6393]	27.7999	30.1368	33.217	3.89569	3.99736	3.22951	1.28552	3.30839	2.46953
ENSG00000163554	SPTA1	8.50467	-2.7872	1.07512	-2.59245	0.144867	0.0095296	0.0211246	6708	protein_coding	HGNC Symbol	10	spectrin alpha, erythrocytic 1 [Source:HGNC Symbol;Acc:HGNC:11272]	0.261393	0.523833	0.362745	0.140245	0.0661815	0	0.0395546	0	0.0509181
ENSG00000087586	AURKA	691.574	-2.7571	0.244172	-11.2916	0.147921	1.44e-29	8.53e-28	6790	protein_coding	HGNC Symbol	13	aurora kinase A [Source:HGNC Symbol;Acc:HGNC:11393]	29.7988	30.1368	33.0616	6.40451	5.92987	6.76563	2.1755	3.162	2.24039
ENSG00000143434	SEMA6C	2103.46	-2.75467	0.364766	-7.55187	0.148171	4.29e-14	5.9e-13	10500	protein_coding	HGNC Symbol	10	semaphorin 6C [Source:HGNC Symbol;Acc:HGNC:10740]	103.512	91.9654	88.6651	41.6839	46.7374	25.366	15.9405	3.57189	5.44823
ENSG00000085719	CPNE3	1598.88	-2.74497	0.151645	-18.1013	0.14917	3.11e-73	1.16e-70	8895	protein_coding	HGNC Symbol	13	copine 3 [Source:HGNC Symbol;Acc:HGNC:2316]	79.9401	68.4257	67.4187	23.4053	29.6626	20.3378	7.17916	4.91867	5.83012
ENSG00000109458	GAB1	568.331	-2.73858	0.212722	-12.8739	0.149833	6.31e-38	7.1e-36	2549	protein_coding	HGNC Symbol	14	GRB2 associated binding protein 1 [Source:HGNC Symbol;Acc:HGNC:4066]	31.1826	24.0636	21.5574	9.92621	11.9259	6.54079	2.49194	1.72739	2.16402
ENSG00000137878	GCOM1	8.77732	-2.73831	1.17164	-2.33716	0.14986	0.0194307	0.0395206	145781	protein_coding	HGNC Symbol	15	GRINL1A complex locus 1 [Source:HGNC Symbol;Acc:HGNC:26424]	0.538162	0.458354	0.220238	0.0934965	0.0794178	0	0.0988865	0	0
ENSG00000166046	TCP11L2	254.612	-2.73701	0.24652	-11.1026	0.149995	1.22e-28	6.85e-27	255394	protein_coding	HGNC Symbol	10	t-complex 11 like 2 [Source:HGNC Symbol;Acc:HGNC:28627]	13.1158	10.6404	10.6103	6.12402	5.38718	3.78139	1.22619	1.02472	0.636476
ENSG00000058056	USP13	536.522	-2.73191	0.198049	-13.7941	0.150527	2.76e-43	4.09e-41	8975	protein_coding	HGNC Symbol	5	ubiquitin specific peptidase 13 [Source:HGNC Symbol;Acc:HGNC:12611]	26.4468	22.7213	23.2545	8.74193	10.642	7.15399	2.86771	1.63956	1.60392
ENSG00000163808	KIF15	284.011	-2.72534	0.380721	-7.15837	0.151213	8.16e-13	9.39e-12	56992	protein_coding	HGNC Symbol	7	kinesin family member 15 [Source:HGNC Symbol;Acc:HGNC:17273]	12.7314	12.6375	12.6831	0.950548	1.28392	0.756279	0.593319	1.66883	0.865607
ENSG00000177685	CRACR2B	253.004	-2.70503	0.34213	-7.90644	0.153357	2.65e-15	4.15e-14	283229	protein_coding	HGNC Symbol	14	calcium release activated channel regulator 2B [Source:HGNC Symbol;Acc:HGNC:28703]	17.4672	8.57776	8.27835	4.28526	4.39445	2.49368	1.32508	0.790501	0.814689
ENSG00000130193	THEM6	766.538	-2.70201	0.228979	-11.8003	0.153679	3.89e-32	2.75e-30	51337	protein_coding	HGNC Symbol	3	thioesterase superfamily member 6 [Source:HGNC Symbol;Acc:HGNC:29656]	36.3028	31.1844	35.5749	21.4419	17.2866	14.3693	4.17301	1.78595	2.95325
ENSG00000180340	FZD2	195.578	-2.69352	0.252452	-10.6695	0.154586	1.41e-26	6.91e-25	2535	protein_coding	HGNC Symbol	1	frizzled class receptor 2 [Source:HGNC Symbol;Acc:HGNC:4040]	8.57983	8.95427	8.61518	5.28255	5.63867	5.04867	0.810869	0.849056	0.611017
ENSG00000121005	CRISPLD1	81.7084	-2.69211	0.376275	-7.15461	0.154738	8.39e-13	9.64e-12	83690	protein_coding	HGNC Symbol	5	cysteine rich secretory protein LCCL domain containing 1 [Source:HGNC Symbol;Acc:HGNC:18206]	4.70507	3.02841	3.27766	11.8741	14.507	11.0171	0.375769	0.2635	0.305508
ENSG00000137812	KNL1	703.041	-2.67592	0.444507	-6.01998	0.156483	1.74e-09	1.31e-08	57082	protein_coding	HGNC Symbol	13	kinetochore scaffold 1 [Source:HGNC Symbol;Acc:HGNC:24054]	26.0009	35.6534	31.9993	3.69311	5.55925	4.29239	0.988865	3.92323	2.82595
ENSG00000080986	NDC80	377.02	-2.67559	0.354586	-7.54569	0.156519	4.5e-14	6.16e-13	10403	protein_coding	HGNC Symbol	5	NDC80, kinetochore complex component [Source:HGNC Symbol;Acc:HGNC:16909]	16.9136	16.6644	16.7381	3.05422	3.60028	2.88203	0.830647	2.108	1.32387
ENSG00000163040	CCDC74A	54.0258	-2.66299	0.518294	-5.138	0.157892	2.78e-07	1.53e-06	90557	protein_coding	HGNC Symbol	8	coiled-coil domain containing 74A [Source:HGNC Symbol;Acc:HGNC:25197]	3.55187	1.88252	1.80077	0.405152	0.569161	0.572319	0.138441	0.292778	0.203672
ENSG00000073146	MOV10L1	265.869	-2.6628	0.394461	-6.75049	0.157912	1.47e-11	1.44e-10	54456	protein_coding	HGNC Symbol	10	Mov10 like RISC complex RNA helicase 1 [Source:HGNC Symbol;Acc:HGNC:7201]	14.392	10.2639	11.1414	3.14772	1.95897	1.71696	2.03706	0.380611	0.840148
ENSG00000111335	OAS2	73.2031	-2.66214	0.573813	-4.63938	0.157985	3.49e-06	1.59e-05	4939	protein_coding	HGNC Symbol	7	2-5-oligoadenylate synthetase 2 [Source:HGNC Symbol;Acc:HGNC:8087]	5.08947	2.58643	2.28011	16.9852	21.0193	16.8425	0.652651	0.146389	0.101836
ENSG00000130768	SMPDL3B	19.9535	-2.65634	0.798466	-3.3268	0.158622	0.000878493	0.00249656	27293	protein_coding	HGNC Symbol	6	sphingomyelin phosphodiesterase acid like 3B [Source:HGNC Symbol;Acc:HGNC:21416]	1.35309	0.851229	0.518206	0.498648	0.10589	0.306599	0.158218	0	0.0763771
ENSG00000086300	SNX10	91.7094	-2.65048	0.475787	-5.57072	0.159267	2.54e-08	1.64e-07	29887	protein_coding	HGNC Symbol	9	sorting nexin 10 [Source:HGNC Symbol;Acc:HGNC:14974]	6.76546	2.9793	2.64285	2.05692	2.14428	1.51256	0.454878	0.439167	0.203672
ENSG00000005108	THSD7A	1047.5	-2.6484	0.30644	-8.64247	0.159497	5.5e-18	1.13e-16	221981	protein_coding	HGNC Symbol	5	thrombospondin type 1 domain containing 7A [Source:HGNC Symbol;Acc:HGNC:22207]	53.3087	46.703	40.3165	16.2216	22.6341	9.99514	7.65382	2.45934	2.90233
ENSG00000092621	PHGDH	603.867	-2.63061	0.342413	-7.68254	0.161476	1.56e-14	2.24e-13	26227	protein_coding	HGNC Symbol	34	phosphoglycerate dehydrogenase [Source:HGNC Symbol;Acc:HGNC:8923]	43.4373	17.3356	20.6635	33.9237	14.454	14.4919	3.55991	2.07872	1.75667
ENSG00000076554	TPD52	201.766	-2.63002	0.44237	-5.94531	0.161542	2.76e-09	2.02e-08	7163	protein_coding	HGNC Symbol	29	tumor protein D52 [Source:HGNC Symbol;Acc:HGNC:12005]	14.4535	7.03901	5.778	3.58403	3.26937	1.3286	1.54263	0.468445	0.509181
ENSG00000095203	EPB41L4B	13.2057	-2.62724	0.867971	-3.02688	0.161853	0.00247095	0.00636172	54566	protein_coding	HGNC Symbol	2	erythrocyte membrane protein band 4.1 like 4B [Source:HGNC Symbol;Acc:HGNC:19818]	0.415153	0.622052	0.725489	0.545396	0.304435	0.12264	0.0791092	0	0.0763771
ENSG00000175899	A2M	89.7239	-2.60678	0.446439	-5.83904	0.164165	5.25e-09	3.72e-08	2	protein_coding	HGNC Symbol	13	alpha-2-macroglobulin [Source:HGNC Symbol;Acc:HGNC:7]	3.07521	5.17285	3.66631	15.8632	10.4037	5.21219	0.51421	0.117111	0.458263
ENSG00000165028	NIPSNAP3B	9.7498	-2.6048	1.01922	-2.55569	0.16439	0.0105978	0.0232415	55335	protein_coding	HGNC Symbol	3	nipsnap homolog 3B [Source:HGNC Symbol;Acc:HGNC:23641]	0.66117	0.376505	0.272058	0.186993	0.119127	0.0817598	0.0395546	0	0.0763771
ENSG00000079102	RUNX1T1	1227.02	-2.60425	0.240167	-10.8435	0.164453	2.14e-27	1.1e-25	862	protein_coding	HGNC Symbol	52	RUNX1 translocation partner 1 [Source:HGNC Symbol;Acc:HGNC:1535]	68.1313	50.9919	44.5658	18.7616	24.3283	14.5941	4.33123	4.94795	5.37186
ENSG00000154856	APCDD1	47.1287	-2.59813	0.686027	-3.78721	0.165153	0.000152349	0.000504535	147495	protein_coding	HGNC Symbol	6	APC down-regulated 1 [Source:HGNC Symbol;Acc:HGNC:15718]	2.84457	1.91526	1.60644	2.92956	2.70021	0.940238	0.474655	0	0.127295
ENSG00000182118	FAM89A	203.95	-2.59582	0.477683	-5.43419	0.165417	5.5e-08	3.39e-07	375061	protein_coding	HGNC Symbol	3	family with sequence similarity 89 member A [Source:HGNC Symbol;Acc:HGNC:25057]	9.42551	8.74146	9.0427	3.00747	2.47519	1.04244	1.9184	0.497723	0.25459
ENSG00000109475	RPL34	10149.8	-2.59427	0.148592	-17.459	0.165595	2.94e-68	9.65e-66	6164	protein_coding	HGNC Symbol	7	ribosomal protein L34 [Source:HGNC Symbol;Acc:HGNC:10340]	500.26	437.368	412.803	40.4528	40.6752	32.7653	55.8511	34.1379	36.0754
ENSG00000137135	ARHGEF39	40.6149	-2.5936	0.510709	-5.07844	0.165671	3.81e-07	2.05e-06	84904	protein_coding	HGNC Symbol	6	Rho guanine nucleotide exchange factor 39 [Source:HGNC Symbol;Acc:HGNC:25909]	1.799	1.65335	1.96918	0.233741	0.185308	0.0408799	0.276882	0.175667	0.0509181
ENSG00000175414	ARL10	690.461	-2.59311	0.319043	-8.1278	0.165728	4.37e-16	7.48e-15	285598	protein_coding	HGNC Symbol	4	ADP ribosylation factor like GTPase 10 [Source:HGNC Symbol;Acc:HGNC:22042]	36.9179	28.8927	26.3508	4.50342	6.48579	3.76095	5.20143	1.55172	2.08764
ENSG00000011638	TMEM159	422.29	-2.58698	0.265285	-9.75173	0.166433	1.81e-22	5.84e-21	57146	protein_coding	HGNC Symbol	9	transmembrane protein 159 [Source:HGNC Symbol;Acc:HGNC:30136]	25.801	16.468	14.147	4.00477	2.47519	2.33016	2.09639	1.66883	1.45116
ENSG00000121152	NCAPH	478.022	-2.58513	0.340118	-7.6007	0.166647	2.95e-14	4.13e-13	23397	protein_coding	HGNC Symbol	7	non-SMC condensin I complex subunit H [Source:HGNC Symbol;Acc:HGNC:1112]	17.8516	20.6259	24.6278	2.39974	2.42224	2.84115	1.16686	2.19583	2.31677
ENSG00000177679	SRRM3	120.224	-2.57564	0.435265	-5.9174	0.167748	3.27e-09	2.38e-08	222183	protein_coding	HGNC Symbol	5	serine/arginine repetitive matrix 3 [Source:HGNC Symbol;Acc:HGNC:26729]	6.44256	4.81272	4.66386	5.92145	6.93582	6.11155	0.237328	0.468445	0.738312
ENSG00000176472	ZNF575	61.6955	-2.56786	0.430561	-5.96397	0.168655	2.46e-09	1.82e-08	284346	protein_coding	HGNC Symbol	5	zinc finger protein 575 [Source:HGNC Symbol;Acc:HGNC:27606]	2.66006	2.17718	3.31652	0.732389	0.754469	0.367919	0.257105	0.175667	0.330967
ENSG00000088756	ARHGAP28	666.915	-2.5577	0.770515	-3.31947	0.169846	0.000901883	0.00255596	79822	protein_coding	HGNC Symbol	15	Rho GTPase activating protein 28 [Source:HGNC Symbol;Acc:HGNC:25509]	37.5329	27.5012	23.682	8.25886	8.57713	4.06755	7.04072	1.22967	0.967443
ENSG00000135363	LMO2	743.84	-2.55649	0.337502	-7.57475	0.169988	3.6e-14	4.99e-13	4005	protein_coding	HGNC Symbol	6	LIM domain only 2 [Source:HGNC Symbol;Acc:HGNC:6642]	40.9003	31.8065	26.2601	19.6343	19.1529	14.5533	5.69586	1.52245	2.52044
ENSG00000121764	HCRTR1	45.0644	-2.55193	0.697831	-3.65695	0.170527	0.000255239	0.000807503	3061	protein_coding	HGNC Symbol	5	hypocretin receptor 1 [Source:HGNC Symbol;Acc:HGNC:4848]	3.05983	1.65335	1.36029	0.373986	0.476507	0.286159	0.435101	0	0.152754
ENSG00000043591	ADRB1	25.7646	-2.54781	0.78441	-3.24805	0.171015	0.00116197	0.00321539	153	protein_coding	HGNC Symbol	1	adrenoceptor beta 1 [Source:HGNC Symbol;Acc:HGNC:285]	0.58429	1.32595	1.42507	2.64907	1.76043	1.67608	0.0395546	0.234222	0.0509181
ENSG00000007968	E2F2	94.1001	-2.5448	0.445675	-5.70999	0.171372	1.13e-08	7.69e-08	1870	protein_coding	HGNC Symbol	2	E2F transcription factor 2 [Source:HGNC Symbol;Acc:HGNC:3114]	4.47443	3.69957	4.18452	0.405152	0.344144	0.327039	0.197773	0.644112	0.330967
ENSG00000165480	SKA3	417.774	-2.5429	0.346512	-7.33858	0.171597	2.16e-13	2.69e-12	221150	protein_coding	HGNC Symbol	7	spindle and kinetochore associated complex subunit 3 [Source:HGNC Symbol;Acc:HGNC:20262]	17.9746	16.9918	20.0675	2.77373	2.56784	2.1462	0.969088	2.04945	2.06218
ENSG00000120594	PLXDC2	7.55945	-2.542	1.08355	-2.346	0.171704	0.0189759	0.0387107	84898	protein_coding	HGNC Symbol	3	plexin domain containing 2 [Source:HGNC Symbol;Acc:HGNC:21013]	0.261393	0.392875	0.336834	0.249324	0.939778	0.572319	0.0395546	0.0585556	0
ENSG00000182359	KBTBD3	55.777	-2.54098	0.462347	-5.49582	0.171827	3.89e-08	2.43e-07	143879	protein_coding	HGNC Symbol	7	kelch repeat and BTB domain containing 3 [Source:HGNC Symbol;Acc:HGNC:22934]	3.13671	2.48821	1.78781	0.934965	1.40305	0.470119	0.276882	0.117111	0.305508
ENSG00000143842	SOX13	1028.74	-2.53254	0.319889	-7.91695	0.172834	2.43e-15	3.82e-14	9580	protein_coding	HGNC Symbol	10	SRY-box 13 [Source:HGNC Symbol;Acc:HGNC:11192]	44.7904	44.935	46.1463	23.5144	26.6182	18.8661	8.32624	2.45934	2.97871
ENSG00000117724	CENPF	1701.17	-2.50719	0.369385	-6.78747	0.175898	1.14e-11	1.13e-10	1063	protein_coding	HGNC Symbol	6	centromere protein F [Source:HGNC Symbol;Acc:HGNC:1857]	60.0588	87.2673	75.5804	7.99395	8.63007	6.80651	3.69836	8.92973	8.22327
ENSG00000135451	TROAP	628.548	-2.50498	0.30993	-8.08241	0.176168	6.35e-16	1.06e-14	10024	protein_coding	HGNC Symbol	16	trophinin associated protein [Source:HGNC Symbol;Acc:HGNC:12327]	22.5413	29.3838	30.3539	2.43091	2.83257	2.63675	1.83929	3.33767	2.69866
ENSG00000109906	ZBTB16	228.584	-2.50364	0.413472	-6.05516	0.176331	1.4e-09	1.07e-08	7704	protein_coding	HGNC Symbol	9	zinc finger and BTB domain containing 16 [Source:HGNC Symbol;Acc:HGNC:12930]	15.376	7.72654	7.35853	14.7413	11.1979	10.6901	1.87884	0.644112	0.560099
ENSG00000181513	ACBD4	142.254	-2.50295	0.329644	-7.5929	0.176416	3.13e-14	4.37e-13	79777	protein_coding	HGNC Symbol	16	acyl-CoA binding domain containing 4 [Source:HGNC Symbol;Acc:HGNC:23337]	8.02629	5.76216	5.03956	2.91398	3.26937	2.30972	0.830647	0.673389	0.356426
ENSG00000163762	TM4SF18	1876.71	-2.50171	0.280084	-8.93201	0.176567	4.18e-19	9.99e-18	116441	protein_coding	HGNC Symbol	5	transmembrane 4 L six family member 18 [Source:HGNC Symbol;Acc:HGNC:25181]	91.918	79.7863	75.8136	31.5083	23.8254	14.6963	14.3583	6.14834	4.88813
ENSG00000095539	SEMA4G	259.875	-2.50132	0.272969	-9.1634	0.176615	5.03e-20	1.34e-18	57715	protein_coding	HGNC Symbol	12	semaphorin 4G [Source:HGNC Symbol;Acc:HGNC:10735]	11.5167	11.5571	11.2192	2.82048	3.36202	2.2484	1.79973	0.966167	0.661935
ENSG00000092421	SEMA6A	226.961	-2.48572	0.364344	-6.82245	0.178535	8.95e-12	9.05e-11	57556	protein_coding	HGNC Symbol	15	semaphorin 6A [Source:HGNC Symbol;Acc:HGNC:10738]	12.1163	8.97064	8.71882	6.01494	7.99473	2.53456	0.573542	1.34678	0.967443
ENSG00000164989	CCDC171	33.4921	-2.4813	0.593378	-4.18166	0.179082	2.89e-05	0.000110753	203238	protein_coding	HGNC Symbol	9	coiled-coil domain containing 171 [Source:HGNC Symbol;Acc:HGNC:29828]	1.87588	1.47328	1.02346	0.327238	0.317671	0.286159	0.0791092	0.234222	0.127295
ENSG00000163864	NMNAT3	24.2357	-2.46598	0.601006	-4.10308	0.180995	4.08e-05	0.000151095	349565	protein_coding	HGNC Symbol	21	nicotinamide nucleotide adenylyltransferase 3 [Source:HGNC Symbol;Acc:HGNC:20989]	1.1532	0.867598	1.17892	0.186993	0.410326	0.265719	0.158218	0.0585556	0.101836
ENSG00000154258	ABCA9	66.5276	-2.46592	0.478531	-5.1531	0.181002	2.56e-07	1.42e-06	10350	protein_coding	HGNC Symbol	8	ATP binding cassette subfamily A member 9 [Source:HGNC Symbol;Acc:HGNC:39]	4.52056	2.48821	1.77486	0.62331	0.410326	0.24528	0.276882	0.292778	0.305508
ENSG00000130755	GMFG	90.091	-2.45955	0.57349	-4.28874	0.181803	1.8e-05	7.23e-05	9535	protein_coding	HGNC Symbol	12	glia maturation factor gamma [Source:HGNC Symbol;Acc:HGNC:4374]	4.61281	3.38854	3.92541	1.15312	1.00596	0.919798	1.00864	0.117111	0.152754
ENSG00000156298	TSPAN7	116.616	-2.45897	0.40015	-6.14512	0.181877	7.99e-10	6.25e-09	7102	protein_coding	HGNC Symbol	8	tetraspanin 7 [Source:HGNC Symbol;Acc:HGNC:11854]	7.58039	4.7145	3.12219	2.04134	1.29716	0.592759	0.632874	0.380611	0.53464
ENSG00000082497	SERTAD4	240.937	-2.4559	0.296752	-8.27594	0.182263	1.27e-16	2.27e-15	56256	protein_coding	HGNC Symbol	4	SERTA domain containing 4 [Source:HGNC Symbol;Acc:HGNC:25236]	12.0394	10.7877	8.91315	3.0698	3.18995	2.26884	1.79973	0.761223	0.712853
ENSG00000119922	IFIT2	37.0572	-2.45117	0.789252	-3.10568	0.182863	0.0018984	0.00501176	3433	protein_coding	HGNC Symbol	3	interferon induced protein with tetratricopeptide repeats 2 [Source:HGNC Symbol;Acc:HGNC:5409]	3.04446	0.998557	0.893906	64.0919	82.449	62.2601	0.276882	0.234222	0
ENSG00000183111	ARHGEF37	299.099	-2.44349	0.279501	-8.74233	0.183838	2.28e-18	4.92e-17	389337	protein_coding	HGNC Symbol	3	Rho guanine nucleotide exchange factor 37 [Source:HGNC Symbol;Acc:HGNC:34430]	13.2695	15.2894	10.6491	5.92145	5.38718	4.59899	2.01729	0.819778	1.22203
ENSG00000184838	PRR16	20.0253	-2.43754	0.646067	-3.77289	0.184598	0.000161367	0.000531823	51334	protein_coding	HGNC Symbol	5	proline rich 16 [Source:HGNC Symbol;Acc:HGNC:29654]	0.907187	0.785749	0.906861	0.747972	0.542689	0.490559	0.0791092	0.117111	0.0763771
ENSG00000162999	DUSP19	35.2243	-2.43267	0.55027	-4.42087	0.185222	9.83e-06	4.14e-05	142679	protein_coding	HGNC Symbol	3	dual specificity phosphatase 19 [Source:HGNC Symbol;Acc:HGNC:18894]	2.04501	1.47328	1.07528	0.436317	0.277962	0.490559	0.118664	0.204945	0.152754
ENSG00000166743	ACSM1	12.8483	-2.4311	0.957764	-2.5383	0.185425	0.0111391	0.0242732	116285	protein_coding	HGNC Symbol	6	acyl-CoA synthetase medium chain family member 1 [Source:HGNC Symbol;Acc:HGNC:18049]	0.384401	0.949447	0.349789	0	0.0529452	0	0.118664	0.0585556	0
ENSG00000184661	CDCA2	379.704	-2.4268	0.371273	-6.53645	0.185977	6.3e-11	5.71e-10	157313	protein_coding	HGNC Symbol	5	cell division cycle associated 2 [Source:HGNC Symbol;Acc:HGNC:14623]	16.6215	15.1257	17.6838	2.50882	2.75315	2.044	0.850424	2.13728	1.93489
ENSG00000072195	SPEG	109.134	-2.40797	0.323947	-7.43321	0.188421	1.06e-13	1.38e-12	10290	protein_coding	HGNC Symbol	22	striated muscle enriched protein kinase [Source:HGNC Symbol;Acc:HGNC:16901]	5.55075	4.50169	4.24929	1.69852	1.95897	0.981118	0.73176	0.468445	0.305508
ENSG00000112294	ALDH5A1	38.2959	-2.40504	0.570271	-4.21736	0.188804	2.47e-05	9.64e-05	7915	protein_coding	HGNC Symbol	5	aldehyde dehydrogenase 5 family member A1 [Source:HGNC Symbol;Acc:HGNC:408]	2.39866	1.50602	1.16596	1.40245	1.50894	0.756279	0.316437	0.0585556	0.152754
ENSG00000176896	TCEANC	20.361	-2.39558	0.641714	-3.73309	0.190046	0.000189145	0.000614497	170082	protein_coding	HGNC Symbol	5	transcription elongation factor A N-terminal and central domain containing [Source:HGNC Symbol;Acc:HGNC:28277]	1.10708	0.76938	0.790265	0.28049	0.436798	0.16352	0.118664	0.0585556	0.101836
ENSG00000137804	NUSAP1	1218.36	-2.36225	0.279148	-8.46238	0.194487	2.62e-17	4.97e-16	51203	protein_coding	HGNC Symbol	13	nucleolar and spindle associated protein 1 [Source:HGNC Symbol;Acc:HGNC:18538]	50.0952	48.34	59.1274	8.72634	7.73	6.54079	4.01479	6.08978	6.44113
ENSG00000086696	HSD17B2	12.2921	-2.35685	0.845224	-2.78843	0.195217	0.00529639	0.0125539	3294	protein_coding	HGNC Symbol	6	hydroxysteroid 17-beta dehydrogenase 2 [Source:HGNC Symbol;Acc:HGNC:5211]	0.645794	0.392875	0.582982	0.109079	0.0264726	0.02044	0.118664	0.0292778	0.025459
ENSG00000130147	SH3BP4	3650.48	-2.35655	0.142006	-16.5947	0.195258	7.61e-62	2.08e-59	23677	protein_coding	HGNC Symbol	11	SH3 domain binding protein 4 [Source:HGNC Symbol;Acc:HGNC:10826]	147.948	159.54	164.505	28.9839	38.4382	30.8235	19.2631	15.5758	16.4465
ENSG00000167037	SGSM1	36.5272	-2.3394	0.509128	-4.59491	0.197593	4.33e-06	1.93e-05	129049	protein_coding	HGNC Symbol	6	small G protein signaling modulator 1 [Source:HGNC Symbol;Acc:HGNC:29410]	1.81437	1.75157	1.16596	1.16871	1.90603	1.24684	0.21755	0.204945	0.101836
ENSG00000073711	PPP2R3A	735.909	-2.33478	0.342688	-6.81312	0.198226	9.55e-12	9.6e-11	5523	protein_coding	HGNC Symbol	5	protein phosphatase 2 regulatory subunit Balpha [Source:HGNC Symbol;Acc:HGNC:9307]	38.9168	30.235	26.4285	9.33407	13.0378	6.00935	6.82317	2.22511	2.03672
ENSG00000143603	KCNN3	322.59	-2.331	0.342505	-6.80574	0.198747	1.01e-11	1e-10	3782	protein_coding	HGNC Symbol	5	potassium calcium-activated channel subfamily N member 3 [Source:HGNC Symbol;Acc:HGNC:6292]	19.6967	12.5556	9.80706	11.952	11.595	8.3395	2.63038	1.14183	0.992902
ENSG00000070759	TESK2	85.074	-2.32902	0.364182	-6.3952	0.19902	1.6e-10	1.38e-09	10420	protein_coding	HGNC Symbol	4	testis associated actin remodelling kinase 2 [Source:HGNC Symbol;Acc:HGNC:11732]	4.85883	3.01204	3.16106	1.02846	1.16479	0.654079	0.454878	0.409889	0.356426
ENSG00000175229	GAL3ST3	14.3388	-2.31796	0.91249	-2.54026	0.200551	0.0110771	0.0241508	89792	protein_coding	HGNC Symbol	3	galactose-3-O-sulfotransferase 3 [Source:HGNC Symbol;Acc:HGNC:24144]	1.18396	0.196437	0.505251	0.218159	0.172072	0.0613199	0.0988865	0.0585556	0.0509181
ENSG00000130304	SLC27A1	552.344	-2.31733	0.34311	-6.75388	0.200639	1.44e-11	1.41e-10	376497	protein_coding	HGNC Symbol	9	solute carrier family 27 member 1 [Source:HGNC Symbol;Acc:HGNC:10995]	29.5374	20.9369	21.1817	7.69788	11.3832	6.02979	5.1421	1.581	1.65484
ENSG00000177465	ACOT4	9.13525	-2.31591	0.991378	-2.33605	0.200836	0.0194886	0.0395992	122970	protein_coding	HGNC Symbol	1	acyl-CoA thioesterase 4 [Source:HGNC Symbol;Acc:HGNC:19748]	0.58429	0.360135	0.259103	0.296072	0.225017	0.286159	0.0791092	0	0.0509181
ENSG00000166821	PEX11A	94.9104	-2.31153	0.405009	-5.70735	0.201447	1.15e-08	7.8e-08	8800	protein_coding	HGNC Symbol	5	peroxisomal biogenesis factor 11 alpha [Source:HGNC Symbol;Acc:HGNC:8852]	4.99721	3.50313	3.86064	1.02846	1.23098	1.08332	0.810869	0.175667	0.407345
ENSG00000275004	ZNF280B	85.4189	-2.29463	0.333837	-6.87351	0.20382	6.26e-12	6.46e-11	140883	protein_coding	HGNC Symbol	3	zinc finger protein 280B [Source:HGNC Symbol;Acc:HGNC:23022]	3.2751	3.69957	3.99019	1.52711	1.77367	1.28772	0.51421	0.380611	0.356426
ENSG00000079482	OPHN1	286.518	-2.28365	0.343911	-6.64023	0.205378	3.13e-11	2.94e-10	4983	protein_coding	HGNC Symbol	5	oligophrenin 1 [Source:HGNC Symbol;Acc:HGNC:8148]	17.0213	10.7877	9.34067	3.95802	5.321	2.22796	2.37328	0.761223	1.19657
ENSG00000061918	GUCY1B1	99.3782	-2.27874	0.570845	-3.99187	0.206078	6.56e-05	0.00023277	2983	protein_coding	HGNC Symbol	8	guanylate cyclase 1 soluble subunit beta 1 [Source:HGNC Symbol;Acc:HGNC:4687]	5.87365	4.35436	2.69467	6.74733	6.57844	3.02511	1.18664	0.204945	0.178213
ENSG00000174032	SLC25A30	475.195	-2.27357	0.233289	-9.74572	0.206817	1.92e-22	6.13e-21	253512	protein_coding	HGNC Symbol	8	solute carrier family 25 member 30 [Source:HGNC Symbol;Acc:HGNC:27371]	26.8158	17.8594	16.6085	11.3442	11.7406	8.21686	2.72927	2.108	2.18948
ENSG00000165092	ALDH1A1	6986.59	-2.27349	0.733691	-3.0987	0.206829	0.0019437	0.00511328	216	protein_coding	HGNC Symbol	7	aldehyde dehydrogenase 1 family member A1 [Source:HGNC Symbol;Acc:HGNC:402]	445.336	237.46	221.248	58.9963	64.6726	39.5718	78.2192	12.7651	21.3601
ENSG00000175471	MCTP1	1774.62	-2.24919	0.354013	-6.35342	0.210342	2.11e-10	1.78e-09	79772	protein_coding	HGNC Symbol	18	multiple C2 and transmembrane domain containing 1 [Source:HGNC Symbol;Acc:HGNC:26183]	107.74	61.3539	59.7103	23.9974	22.7003	17.2718	17.048	5.85556	5.24456
ENSG00000178075	GRAMD1C	392.678	-2.24824	0.221309	-10.1588	0.21048	3.03e-24	1.17e-22	54762	protein_coding	HGNC Symbol	15	GRAM domain containing 1C [Source:HGNC Symbol;Acc:HGNC:25252]	19.6198	14.8965	15.9348	5.75004	5.10921	3.14775	2.66994	1.37606	1.88397
ENSG00000167536	DHRS13	131.214	-2.24793	0.350702	-6.40978	0.210527	1.46e-10	1.27e-09	147015	protein_coding	HGNC Symbol	5	dehydrogenase/reductase 13 [Source:HGNC Symbol;Acc:HGNC:28326]	7.87253	4.5508	4.53431	5.71887	5.49307	4.57855	0.988865	0.468445	0.53464
ENSG00000175155	YPEL2	1747.97	-2.2412	0.691483	-3.24115	0.21151	0.00119049	0.00328213	388403	protein_coding	HGNC Symbol	5	yippee like 2 [Source:HGNC Symbol;Acc:HGNC:18326]	86.398	70.6683	66.9134	24.6987	26.2211	15.6366	21.2013	3.57189	4.14982
ENSG00000118193	KIF14	339.798	-2.23912	0.348757	-6.4203	0.211815	1.36e-10	1.19e-09	9928	protein_coding	HGNC Symbol	2	kinesin family member 14 [Source:HGNC Symbol;Acc:HGNC:19181]	15.4068	14.2908	13.6288	1.60502	3.17671	1.7374	1.22619	2.635	1.14566
ENSG00000058453	CROCC	387.161	-2.23707	0.207481	-10.782	0.212117	4.19e-27	2.1e-25	9696	protein_coding	HGNC Symbol	13	ciliary rootlet coiled-coil, rootletin [Source:HGNC Symbol;Acc:HGNC:21299]	16.7291	16.3207	16.5178	5.03323	6.90935	5.04867	2.80838	1.49317	1.60392
ENSG00000089685	BIRC5	1852.05	-2.2369	0.42292	-5.2892	0.212141	1.23e-07	7.13e-07	332	protein_coding	HGNC Symbol	11	baculoviral IAP repeat containing 5 [Source:HGNC Symbol;Acc:HGNC:593]	66.8243	79.2134	89.6238	7.07457	6.9623	4.84427	3.57969	12.3552	10.3364
ENSG00000174004	NRROS	219.598	-2.23192	0.275774	-8.09328	0.212875	5.81e-16	9.83e-15	375387	protein_coding	HGNC Symbol	2	negative regulator of reactive oxygen species [Source:HGNC Symbol;Acc:HGNC:24613]	11.3629	8.234	8.57632	7.16807	7.35939	7.23575	1.40419	0.673389	1.24749
ENSG00000166783	MARF1	1533.43	-2.22242	0.199933	-11.1158	0.214281	1.05e-28	5.95e-27	9665	protein_coding	HGNC Symbol	15	meiosis regulator and mRNA stability factor 1 [Source:HGNC Symbol;Acc:HGNC:29562]	68.285	62.9909	64.1281	19.9459	23.3224	16.2702	7.00117	8.60767	7.3322
ENSG00000108947	EFNB3	167.19	-2.22193	0.345422	-6.43249	0.214355	1.26e-10	1.1e-09	1949	protein_coding	HGNC Symbol	1	ephrin B3 [Source:HGNC Symbol;Acc:HGNC:3228]	4.68969	9.23256	7.22898	1.40245	1.29716	1.00156	0.909756	0.731945	0.891066
ENSG00000143126	CELSR2	326.266	-2.21841	0.456883	-4.85553	0.214878	1.2e-06	5.96e-06	1952	protein_coding	HGNC Symbol	4	cadherin EGF LAG seven-pass G-type receptor 2 [Source:HGNC Symbol;Acc:HGNC:3231]	9.90217	16.6481	14.6912	3.9736	5.13569	4.59899	0.632874	2.19583	1.88397
ENSG00000131747	TOP2A	2271.48	-2.20366	0.334673	-6.5845	0.217086	4.56e-11	4.22e-10	7153	protein_coding	HGNC Symbol	5	DNA topoisomerase II alpha [Source:HGNC Symbol;Acc:HGNC:11989]	93.5017	102.573	92.4092	15.1464	15.8968	12.9181	6.50673	14.961	11.8639
ENSG00000082458	DLG3	72.0634	-2.19907	0.673589	-3.2647	0.217779	0.00109581	0.00303845	1741	protein_coding	HGNC Symbol	10	discs large MAGUK scaffold protein 3 [Source:HGNC Symbol;Acc:HGNC:2902]	2.98295	3.06115	3.18697	2.46208	2.05163	1.88048	1.02842	0.0585556	0.127295
ENSG00000088305	DNMT3B	196.064	-2.1949	0.261489	-8.39388	0.218408	4.7e-17	8.68e-16	1789	protein_coding	HGNC Symbol	6	DNA methyltransferase 3 beta [Source:HGNC Symbol;Acc:HGNC:2979]	9.10262	7.75928	8.07107	1.93226	2.48843	1.26728	1.08775	0.702667	1.22203
ENSG00000270647	TAF15	7866.25	-2.18978	0.149243	-14.6726	0.219185	9.66e-49	1.94e-46	8148	protein_coding	HGNC Symbol	15	TATA-box binding protein associated factor 15 [Source:HGNC Symbol;Acc:HGNC:11547]	316.839	350.673	329.813	71.1976	73.3688	62.4441	44.4594	41.7209	35.1844
ENSG00000143127	ITGA10	781.275	-2.18706	0.181844	-12.0271	0.219598	2.56e-33	1.96e-31	8515	protein_coding	HGNC Symbol	4	integrin subunit alpha 10 [Source:HGNC Symbol;Acc:HGNC:6135]	31.7208	36.9957	30.3539	14.8348	19.0735	12.9385	5.08277	3.89395	3.2333
ENSG00000184206	GOLGA6L4	8.48241	-2.18482	0.976334	-2.23778	0.219939	0.0252354	0.0496427	643707	protein_coding	HGNC Symbol	5	golgin A6 family-like 4 [Source:HGNC Symbol;Acc:HGNC:27256]	0.399777	0.409245	0.285014	0.109079	0.0926541	0.0613199	0.0791092	0	0.0509181
ENSG00000183283	DAZAP2	6621.14	-2.18009	0.138332	-15.7599	0.220662	5.88e-56	1.34e-53	9802	protein_coding	HGNC Symbol	15	DAZ associated protein 2 [Source:HGNC Symbol;Acc:HGNC:2684]	291.591	263.553	285.014	52.8255	51.5025	34.6253	44.2616	27.7846	32.0784
ENSG00000166689	PLEKHA7	141.552	-2.15646	0.331231	-6.51044	0.224306	7.49e-11	6.73e-10	144100	protein_coding	HGNC Symbol	19	pleckstrin homology domain containing A7 [Source:HGNC Symbol;Acc:HGNC:27049]	8.33382	5.36929	4.33998	7.0434	4.64594	3.80183	0.969088	0.644112	0.636476
ENSG00000184986	TMEM121	171.75	-2.15565	0.277788	-7.76005	0.224433	8.49e-15	1.27e-13	80757	protein_coding	HGNC Symbol	3	transmembrane protein 121 [Source:HGNC Symbol;Acc:HGNC:20511]	7.14986	6.41695	8.16175	3.36587	4.16944	3.00467	1.10753	0.585556	1.01836
ENSG00000100100	PIK3IP1	352.188	-2.15209	0.309585	-6.95154	0.224986	3.61e-12	3.83e-11	113791	protein_coding	HGNC Symbol	6	phosphoinositide-3-kinase interacting protein 1 [Source:HGNC Symbol;Acc:HGNC:24942]	20.0657	13.1122	11.6596	10.1132	9.45072	4.88515	2.51172	1.02472	2.08764
ENSG00000167900	TK1	1777.91	-2.15169	0.33647	-6.39491	0.225048	1.61e-10	1.38e-09	7083	protein_coding	HGNC Symbol	6	thymidine kinase 1 [Source:HGNC Symbol;Acc:HGNC:11830]	63.1648	76.1358	84.4936	6.31102	6.19459	5.70275	5.51787	12.2674	9.16525
ENSG00000157551	KCNJ15	32.7427	-2.14798	0.697876	-3.07789	0.225628	0.00208474	0.00544245	3772	protein_coding	HGNC Symbol	22	potassium voltage-gated channel subfamily J member 15 [Source:HGNC Symbol;Acc:HGNC:6261]	1.81437	1.06404	1.33438	0.981714	1.19127	1.022	0.435101	0.0878334	0.025459
ENSG00000183248	PRR36	20.0742	-2.14139	0.734703	-2.91463	0.226662	0.00356113	0.00881748	80164	protein_coding	HGNC Symbol	2	proline rich 36 [Source:HGNC Symbol;Acc:HGNC:26172]	0.58429	1.0313	0.893906	0.576562	0.450034	0.449679	0.0791092	0.0292778	0.203672
ENSG00000156049	GNA14	61.7275	-2.13695	0.74263	-2.87755	0.227359	0.00400775	0.00983144	9630	protein_coding	HGNC Symbol	2	G protein subunit alpha 14 [Source:HGNC Symbol;Acc:HGNC:4382]	4.7512	1.65335	1.55462	2.30625	2.76639	1.86004	0.830647	0.0292778	0.203672
ENSG00000099797	TECR	1650.56	-2.13541	0.176007	-12.1325	0.227603	7.1e-34	5.55e-32	9524	protein_coding	HGNC Symbol	26	trans-2,3-enoyl-CoA reductase [Source:HGNC Symbol;Acc:HGNC:4551]	69.2691	62.7126	75.9691	33.2692	28.511	26.4697	8.95912	8.10995	9.06342
ENSG00000180938	ZNF572	13.0841	-2.13369	0.937335	-2.27633	0.227874	0.022826	0.0454693	137209	protein_coding	HGNC Symbol	1	zinc finger protein 572 [Source:HGNC Symbol;Acc:HGNC:26758]	0.922563	0.458354	0.310924	0.233741	0.238254	0.12264	0.158218	0.0585556	0
ENSG00000158292	GPR153	276.308	-2.12638	0.335268	-6.34234	0.229031	2.26e-10	1.91e-09	387509	protein_coding	HGNC Symbol	1	G protein-coupled receptor 153 [Source:HGNC Symbol;Acc:HGNC:23618]	13.7923	10.3784	10.8694	7.19923	6.03576	4.74207	2.66994	0.731945	1.19657
ENSG00000176720	BOK	2820.55	-2.12149	0.302632	-7.01014	0.229809	2.38e-12	2.59e-11	666	protein_coding	HGNC Symbol	2	BCL2 family apoptosis regulator BOK [Source:HGNC Symbol;Acc:HGNC:1087]	140.552	105.209	110.546	29.3735	25.9696	19.05	27.9453	8.98828	10.8965
ENSG00000165495	PKNOX2	155.618	-2.11889	0.437407	-4.84421	0.230224	1.27e-06	6.29e-06	63876	protein_coding	HGNC Symbol	14	PBX/knotted 1 homeobox 2 [Source:HGNC Symbol;Acc:HGNC:16714]	10.917	5.17285	3.78291	4.83065	5.09598	2.88203	1.36463	0.497723	0.712853
ENSG00000111674	ENO2	505.125	-2.11475	0.372045	-5.68412	0.230885	1.31e-08	8.87e-08	2026	protein_coding	HGNC Symbol	14	enolase 2 [Source:HGNC Symbol;Acc:HGNC:3353]	10.2251	24.4237	28.2034	24.0286	26.2079	22.6475	2.68971	3.07417	2.31677
ENSG00000111145	ELK3	9585.98	-2.1129	0.170045	-12.4255	0.231182	1.9e-35	1.61e-33	2004	protein_coding	HGNC Symbol	6	ELK3, ETS transcription factor [Source:HGNC Symbol;Acc:HGNC:3325]	441.861	397.295	367.758	207.671	251.119	146.575	53.814	43.8874	55.9335
ENSG00000168062	BATF2	39.8663	-2.1113	0.553186	-3.81662	0.231438	0.00013529	0.000453525	116071	protein_coding	HGNC Symbol	5	basic leucine zipper ATF-like transcription factor 2 [Source:HGNC Symbol;Acc:HGNC:25163]	2.76769	1.26047	1.03641	1.86993	2.18399	1.71696	0.237328	0.204945	0.203672
ENSG00000142327	RNPEPL1	2584.58	-2.10756	0.15576	-13.5308	0.232039	1.03e-41	1.41e-39	57140	protein_coding	HGNC Symbol	10	arginyl aminopeptidase like 1 [Source:HGNC Symbol;Acc:HGNC:10079]	113.168	104.194	107.359	29.467	28.7757	25.6522	14.1012	13.7898	13.646
ENSG00000118898	PPL	88.8915	-2.10426	0.379436	-5.54575	0.232571	2.93e-08	1.86e-07	5493	protein_coding	HGNC Symbol	6	periplakin [Source:HGNC Symbol;Acc:HGNC:9273]	3.09058	4.91093	3.08333	0.545396	1.0192	0.735839	0.454878	0.527	0.458263
ENSG00000167363	FN3K	360.597	-2.10372	0.19743	-10.6555	0.232658	1.64e-26	7.99e-25	64122	protein_coding	HGNC Symbol	5	fructosamine 3 kinase [Source:HGNC Symbol;Acc:HGNC:24822]	17.3442	13.6197	14.4709	8.47702	7.53146	5.55967	2.49194	1.72739	1.6803
ENSG00000157833	GAREM2	271.524	-2.10233	0.237696	-8.84461	0.232882	9.18e-19	2.12e-17	150946	protein_coding	HGNC Symbol	3	GRB2 associated regulator of MAPK1 subtype 2 [Source:HGNC Symbol;Acc:HGNC:27172]	9.90217	12.3101	11.7762	4.25409	5.47983	3.78139	1.66129	1.17111	1.57846
ENSG00000163683	SMIM14	449.568	-2.10199	0.411411	-5.10923	0.232936	3.23e-07	1.76e-06	201895	protein_coding	HGNC Symbol	7	small integral membrane protein 14 [Source:HGNC Symbol;Acc:HGNC:27321]	28.4303	16.157	12.4758	17.0631	17.5116	10.1382	4.80588	1.20039	1.73121
ENSG00000176834	VSIG10	630.772	-2.09752	0.221871	-9.45381	0.233659	3.27e-21	9.42e-20	54621	protein_coding	HGNC Symbol	13	V-set and immunoglobulin domain containing 10 [Source:HGNC Symbol;Acc:HGNC:26078]	33.2123	24.0799	22.1404	9.38082	8.48447	6.09111	3.75769	3.77684	2.74958
ENSG00000181192	DHTKD1	545.806	-2.09509	0.70676	-2.96436	0.234054	0.00303317	0.00766084	55526	protein_coding	HGNC Symbol	6	dehydrogenase E1 and transketolase domain containing 1 [Source:HGNC Symbol;Acc:HGNC:23537]	30.2601	20.3804	18.2668	19.3226	17.7102	10.8536	7.17916	1.28822	1.32387
ENSG00000184992	BRI3BP	317.697	-2.08749	0.308086	-6.77569	0.235289	1.24e-11	1.22e-10	140707	protein_coding	HGNC Symbol	1	BRI3 binding protein [Source:HGNC Symbol;Acc:HGNC:14251]	11.3475	13.9307	14.2895	3.2568	5.18863	4.25151	1.24597	2.19583	1.65484
ENSG00000166823	MESP1	22.7635	-2.08743	0.624545	-3.34232	0.2353	0.000830812	0.00236926	55897	protein_coding	HGNC Symbol	2	mesoderm posterior bHLH transcription factor 1 [Source:HGNC Symbol;Acc:HGNC:29658]	1.21471	0.654791	0.971637	0.560979	0.50298	0.613199	0.0988865	0.175667	0.101836
ENSG00000130707	ASS1	216.723	-2.08626	0.359736	-5.7994	0.235491	6.66e-09	4.66e-08	445	protein_coding	HGNC Symbol	10	argininosuccinate synthase 1 [Source:HGNC Symbol;Acc:HGNC:758]	9.6254	10.1984	7.46217	6.71617	3.7194	2.92291	2.13595	0.527	1.01836
ENSG00000136108	CKAP2	1571.4	-2.08437	0.167996	-12.4072	0.2358	2.39e-35	1.98e-33	26586	protein_coding	HGNC Symbol	7	cytoskeleton associated protein 2 [Source:HGNC Symbol;Acc:HGNC:1990]	78.4793	60.0771	58.8423	25.3064	30.7215	19.6632	9.49311	8.46128	7.81592
ENSG00000079257	LXN	2130.57	-2.07922	0.280886	-7.40238	0.236642	1.34e-13	1.72e-12	56925	protein_coding	HGNC Symbol	2	latexin [Source:HGNC Symbol;Acc:HGNC:13347]	102.835	81.2432	83.4701	11.5624	12.8657	10.547	20.8848	7.46584	8.4524
ENSG00000176920	FUT2	15.806	-2.07637	0.755059	-2.74994	0.237111	0.00596066	0.0139433	2524	protein_coding	HGNC Symbol	4	fucosyltransferase 2 [Source:HGNC Symbol;Acc:HGNC:4013]	0.707298	0.703901	0.595937	0.342821	0.582397	0.449679	0.158218	0	0.101836
ENSG00000099282	TSPAN15	1461.97	-2.07479	0.423298	-4.90149	0.23737	9.51e-07	4.79e-06	23555	protein_coding	HGNC Symbol	8	tetraspanin 15 [Source:HGNC Symbol;Acc:HGNC:23298]	69.8841	56.885	56.6918	6.98107	7.17408	3.27039	18.116	3.24984	4.83722
ENSG00000143013	LMO4	677.862	-2.07184	0.214593	-9.65477	0.237856	4.69e-22	1.44e-20	8543	protein_coding	HGNC Symbol	4	LIM domain only 4 [Source:HGNC Symbol;Acc:HGNC:6644]	36.6257	25.3404	23.2027	37.57	30.4965	23.1585	4.23234	3.60117	3.38605
ENSG00000175287	PHYHD1	11.7772	-2.06885	0.922395	-2.24291	0.238349	0.0249025	0.0490231	254295	protein_coding	HGNC Symbol	13	phytanoyl-CoA dioxygenase domain containing 1 [Source:HGNC Symbol;Acc:HGNC:23396]	0.922563	0.360135	0.207283	0.576562	0.211781	0.22484	0.0593319	0.0585556	0.0763771
ENSG00000003096	KLHL13	442.2	-2.06872	0.234058	-8.83849	0.23837	9.7e-19	2.22e-17	90293	protein_coding	HGNC Symbol	9	kelch like family member 13 [Source:HGNC Symbol;Acc:HGNC:22931]	21.0806	17.794	16.6603	6.2331	7.45204	4.70119	3.77747	1.96161	1.75667
ENSG00000090447	TFAP4	225.333	-2.06345	0.298676	-6.90866	0.239243	4.89e-12	5.12e-11	7023	protein_coding	HGNC Symbol	7	transcription factor AP-4 [Source:HGNC Symbol;Acc:HGNC:11745]	9.21025	9.24893	9.54795	3.44379	3.49438	2.75939	0.889979	1.46389	1.32387
ENSG00000118777	ABCG2	284.354	-2.06073	0.282556	-7.29319	0.239694	3.03e-13	3.65e-12	9429	protein_coding	HGNC Symbol	5	ATP binding cassette subfamily G member 2 (Junior blood group) [Source:HGNC Symbol;Acc:HGNC:74]	10.1021	13.8652	11.5171	4.62808	4.80478	1.88048	2.31394	0.93689	1.553
ENSG00000154545	MAGED4	24.0961	-2.05836	0.584564	-3.52119	0.240089	0.000429612	0.00129864	728239	protein_coding	HGNC Symbol	11	MAGE family member D4 [Source:HGNC Symbol;Acc:HGNC:23793]	0.73805	1.17862	1.07528	0.436317	0.383853	0.327039	0.158218	0.117111	0.127295
ENSG00000174514	MFSD4A	18.0833	-2.05623	0.73569	-2.79497	0.240443	0.00519039	0.0123347	148808	protein_coding	HGNC Symbol	11	major facilitator superfamily domain containing 4A [Source:HGNC Symbol;Acc:HGNC:25433]	0.753426	0.785749	0.725489	0.264907	0.423562	0.265719	0.118664	0	0.178213
ENSG00000166145	SPINT1	173.202	-2.05577	0.336133	-6.11594	0.24052	9.6e-10	7.47e-09	6692	protein_coding	HGNC Symbol	11	serine peptidase inhibitor, Kunitz type 1 [Source:HGNC Symbol;Acc:HGNC:11246]	9.77916	5.87675	6.17961	2.166	2.18399	2.3506	1.60196	0.702667	0.661935
ENSG00000076555	ACACB	83.0732	-2.05103	0.375229	-5.46607	0.241312	4.6e-08	2.86e-07	32	protein_coding	HGNC Symbol	15	acetyl-CoA carboxylase beta [Source:HGNC Symbol;Acc:HGNC:85]	4.70507	2.91382	2.82423	3.6152	3.00464	2.82071	0.632874	0.468445	0.305508
ENSG00000137266	SLC22A23	454.173	-2.0415	0.295787	-6.90191	0.242912	5.13e-12	5.35e-11	63027	protein_coding	HGNC Symbol	12	solute carrier family 22 member 23 [Source:HGNC Symbol;Acc:HGNC:21106]	23.6791	17.221	16.0255	6.52917	6.12841	4.25151	4.31145	2.108	1.50208
ENSG00000178175	ZNF366	259.353	-2.03142	0.25292	-8.03187	0.244614	9.6e-16	1.57e-14	167465	protein_coding	HGNC Symbol	3	zinc finger protein 366 [Source:HGNC Symbol;Acc:HGNC:18316]	10.917	11.6225	9.80706	8.80426	10.642	7.17443	2.21506	1.28822	0.967443
ENSG00000184619	KRBA2	45.0522	-2.03049	0.439505	-4.61994	0.244772	3.84e-06	1.73e-05	124751	protein_coding	HGNC Symbol	5	KRAB-A domain containing 2 [Source:HGNC Symbol;Acc:HGNC:26989]	2.16802	1.78431	1.71008	0.638893	1.04567	0.674519	0.415323	0.175667	0.178213
ENSG00000137857	DUOX1	11.0501	-2.02235	0.824201	-2.4537	0.246158	0.0141393	0.0299372	53905	protein_coding	HGNC Symbol	12	dual oxidase 1 [Source:HGNC Symbol;Acc:HGNC:3062]	0.492033	0.572942	0.310924	0.638893	0.873596	0.470119	0.0791092	0.0585556	0.0509181
ENSG00000278535	DHRS11	283.579	-2.02195	0.222386	-9.09205	0.246226	9.72e-20	2.49e-18	79154	protein_coding	HGNC Symbol	8	dehydrogenase/reductase 11 [Source:HGNC Symbol;Acc:HGNC:28639]	12.6084	11.2133	11.3358	3.36587	3.77235	2.96379	1.60196	1.8445	1.37479
ENSG00000011523	CEP68	1566.82	-2.01155	0.327343	-6.14508	0.248007	7.99e-10	6.25e-09	23177	protein_coding	HGNC Symbol	5	centrosomal protein 68 [Source:HGNC Symbol;Acc:HGNC:29076]	81.37	59.8315	54.1267	17.141	24.6857	13.8583	16.9689	6.324	5.06635
ENSG00000135324	MRAP2	169.532	-2.00174	0.375047	-5.33731	0.249698	9.43e-08	5.57e-07	112609	protein_coding	HGNC Symbol	1	melanocortin 2 receptor accessory protein 2 [Source:HGNC Symbol;Acc:HGNC:21232]	9.71766	6.54791	4.94887	5.43838	7.37262	3.37259	1.54263	0.468445	0.967443
ENSG00000164512	ANKRD55	49.2273	-2.00098	0.49989	-4.00284	0.24983	6.26e-05	0.000223199	79722	protein_coding	HGNC Symbol	6	ankyrin repeat domain 55 [Source:HGNC Symbol;Acc:HGNC:25681]	3.15209	1.53876	1.5028	0.872634	1.13832	0.633639	0.454878	0.175667	0.229131
ENSG00000109103	UNC119	660.505	-1.99798	0.227207	-8.79365	0.25035	1.45e-18	3.24e-17	9094	protein_coding	HGNC Symbol	8	unc-119 lipid binding chaperone [Source:HGNC Symbol;Acc:HGNC:12565]	31.5209	24.9639	25.6512	18.9642	17.9617	14.5533	5.89364	2.75211	3.02962
ENSG00000119866	BCL11A	10.9612	-1.99636	0.848988	-2.35146	0.250631	0.0187	0.038238	53335	protein_coding	HGNC Symbol	27	BCL11A, BAF complex component [Source:HGNC Symbol;Acc:HGNC:13221]	0.615042	0.294656	0.453431	0.249324	0.0926541	0.16352	0.0791092	0.0878334	0.025459
ENSG00000155827	RNF20	746.891	-1.99029	0.172502	-11.5378	0.251689	8.51e-31	5.5e-29	56254	protein_coding	HGNC Symbol	6	ring finger protein 20 [Source:HGNC Symbol;Acc:HGNC:10062]	34.1041	29.8748	28.6568	7.86929	11.5024	7.64455	5.77497	3.39622	3.89523
ENSG00000076248	UNG	756.588	-1.98845	0.215824	-9.21328	0.25201	3.16e-20	8.6e-19	7374	protein_coding	HGNC Symbol	5	uracil DNA glycosylase [Source:HGNC Symbol;Acc:HGNC:12572]	39.8086	26.9447	27.2965	12.8246	10.2317	6.52035	5.89364	4.06961	3.33513
ENSG00000137807	KIF23	726.855	-1.96937	0.200771	-9.80903	0.255364	1.03e-22	3.37e-21	9493	protein_coding	HGNC Symbol	15	kinesin family member 23 [Source:HGNC Symbol;Acc:HGNC:6392]	28.8147	29.5475	31.0276	6.09286	5.37394	4.66031	3.93568	4.42095	4.2262
ENSG00000164638	SLC29A4	436.822	-1.96786	0.251599	-7.8214	0.255632	5.22e-15	7.96e-14	222962	protein_coding	HGNC Symbol	6	solute carrier family 29 member 4 [Source:HGNC Symbol;Acc:HGNC:23097]	14.1306	18.8416	20.5987	4.00477	4.83125	4.08799	2.57105	2.19583	2.82595
ENSG00000054793	ATP9A	2231.68	-1.96552	0.15355	-12.8005	0.256048	1.63e-37	1.72e-35	10079	protein_coding	HGNC Symbol	3	ATPase phospholipid transporting 9A (putative) [Source:HGNC Symbol;Acc:HGNC:13540]	95.9773	93.5206	85.8279	29.093	42.9253	29.7401	17.7402	10.5986	11.4056
ENSG00000084731	KIF3C	1740.2	-1.96502	0.233921	-8.40036	0.256136	4.45e-17	8.25e-16	3797	protein_coding	HGNC Symbol	7	kinesin family member 3C [Source:HGNC Symbol;Acc:HGNC:6321]	69.0077	69.1787	76.2282	30.3396	41.84	30.7826	16.3756	6.88028	8.3251
ENSG00000020922	MRE11	345.601	-1.96337	0.194366	-10.1014	0.256428	5.44e-24	2.06e-22	4361	protein_coding	HGNC Symbol	10	MRE11 homolog, double strand break repair nuclease [Source:HGNC Symbol;Acc:HGNC:7230]	15.9296	13.8325	12.9293	4.11385	4.06355	3.39303	2.49194	1.66883	1.93489
ENSG00000156787	TBC1D31	139.552	-1.96324	0.270349	-7.26187	0.256453	3.82e-13	4.54e-12	93594	protein_coding	HGNC Symbol	15	TBC1 domain family member 31 [Source:HGNC Symbol;Acc:HGNC:30888]	5.50462	5.66394	5.94642	2.53999	2.17075	1.41036	0.791092	0.790501	0.865607
ENSG00000168016	TRANK1	421.846	-1.95729	0.269855	-7.25312	0.257511	4.07e-13	4.84e-12	9881	protein_coding	HGNC Symbol	7	tetratricopeptide repeat and ankyrin repeat containing 1 [Source:HGNC Symbol;Acc:HGNC:29011]	22.4336	16.1733	13.6936	37.1649	49.5303	34.6253	3.79724	1.69811	2.1131
ENSG00000110057	UNC93B1	437.401	-1.95693	0.232534	-8.41571	0.257575	3.91e-17	7.29e-16	81622	protein_coding	HGNC Symbol	10	unc-93 homolog B1, TLR signaling regulator [Source:HGNC Symbol;Acc:HGNC:13481]	18.7434	16.2879	18.9793	9.44315	10.5493	9.6681	3.95546	1.78595	2.13856
ENSG00000154016	GRAP	132.299	-1.95399	0.316563	-6.17253	0.258101	6.72e-10	5.31e-09	10750	protein_coding	HGNC Symbol	5	GRB2 related adaptor protein [Source:HGNC Symbol;Acc:HGNC:4562]	6.35031	4.20703	5.72618	1.24662	1.17803	0.674519	0.73176	0.644112	0.941984
ENSG00000177570	SAMD12	169.372	-1.94935	0.34165	-5.70571	0.258932	1.16e-08	7.86e-08	401474	protein_coding	HGNC Symbol	10	sterile alpha motif domain containing 12 [Source:HGNC Symbol;Acc:HGNC:31750]	8.99499	6.59702	5.42821	2.01018	2.93846	1.41036	1.62174	0.527	0.916525
ENSG00000119917	IFIT3	79.8341	-1.94623	0.501754	-3.87886	0.259493	0.000104947	0.000360353	3437	protein_coding	HGNC Symbol	2	interferon induced protein with tetratricopeptide repeats 3 [Source:HGNC Symbol;Acc:HGNC:5411]	5.88902	2.30814	1.77486	81.638	102.475	90.7943	0.672428	0.409889	0.356426
ENSG00000136490	LIMD2	1550.1	-1.94144	0.331667	-5.85358	0.260357	4.81e-09	3.42e-08	80774	protein_coding	HGNC Symbol	12	LIM domain containing 2 [Source:HGNC Symbol;Acc:HGNC:28142]	81.1701	53.742	56.5363	25.3687	20.3442	17.517	17.6414	6.11906	5.44823
ENSG00000136630	HLX	438.418	-1.93986	0.399522	-4.85546	0.260641	1.2e-06	5.96e-06	3142	protein_coding	HGNC Symbol	3	H2.0 like homeobox [Source:HGNC Symbol;Acc:HGNC:4978]	19.2816	15.3876	19.355	9.81714	5.5063	4.98735	5.51787	1.17111	1.65484
ENSG00000168060	NAALADL1	43.2088	-1.93594	0.509341	-3.80086	0.261352	0.000144192	0.000480817	10004	protein_coding	HGNC Symbol	22	N-acetylated alpha-linked acidic dipeptidase like 1 [Source:HGNC Symbol;Acc:HGNC:23536]	2.52167	1.01493	1.81372	0.701224	0.701524	0.572319	0.316437	0.175667	0.280049
ENSG00000076382	SPAG5	696.579	-1.93168	0.395579	-4.88318	0.262123	1.04e-06	5.22e-06	10615	protein_coding	HGNC Symbol	16	sperm associated antigen 5 [Source:HGNC Symbol;Acc:HGNC:13452]	25.7702	27.2721	32.1029	6.06169	6.45932	5.49835	1.87884	5.62134	4.32804
ENSG00000182240	BACE2	4228.75	-1.92893	0.258678	-7.45688	0.262624	8.86e-14	1.17e-12	25825	protein_coding	HGNC Symbol	10	beta-secretase 2 [Source:HGNC Symbol;Acc:HGNC:934]	193.784	167.332	158.468	40.2814	38.1206	28.9839	42.8772	15.8686	20.2145
ENSG00000177000	MTHFR	588.893	-1.92672	0.223589	-8.61725	0.263026	6.86e-18	1.38e-16	4524	protein_coding	HGNC Symbol	19	methylenetetrahydrofolate reductase [Source:HGNC Symbol;Acc:HGNC:7436]	30.6752	20.9533	20.9744	18.7772	21.2046	17.4148	4.94433	3.01561	2.77503
ENSG00000167191	GPRC5B	857.52	-1.92214	0.229606	-8.37148	0.263863	5.69e-17	1.04e-15	51704	protein_coding	HGNC Symbol	11	G protein-coupled receptor class C group 5 member B [Source:HGNC Symbol;Acc:HGNC:13308]	35.6878	33.6563	35.834	24.8233	19.6956	17.9463	8.14825	4.27456	3.46243
ENSG00000040608	RTN4R	82.3651	-1.91659	0.423458	-4.52604	0.26488	6.01e-06	2.62e-05	65078	protein_coding	HGNC Symbol	6	reticulon 4 receptor [Source:HGNC Symbol;Acc:HGNC:18601]	2.5063	4.41984	3.08333	2.60232	2.43548	1.90092	0.454878	0.322056	0.687394
ENSG00000183873	SCN5A	362.854	-1.91643	0.220601	-8.68734	0.264908	3.71e-18	7.77e-17	6331	protein_coding	HGNC Symbol	14	sodium voltage-gated channel alpha subunit 5 [Source:HGNC Symbol;Acc:HGNC:10593]	12.6852	15.5349	15.9867	5.04881	5.67838	5.62099	2.27439	2.108	2.13856
ENSG00000164649	CDCA7L	1356.16	-1.90848	0.240403	-7.93866	0.266373	2.04e-15	3.23e-14	55536	protein_coding	HGNC Symbol	10	cell division cycle associated 7 like [Source:HGNC Symbol;Acc:HGNC:30777]	63.5646	49.8132	52.9477	17.3748	18.9014	16.8834	13.231	6.76317	5.42277
ENSG00000165516	KLHDC2	484.629	-1.90127	0.28021	-6.78515	0.267708	1.16e-11	1.14e-10	23588	protein_coding	HGNC Symbol	11	kelch domain containing 2 [Source:HGNC Symbol;Acc:HGNC:20231]	21.6956	19.6765	18.0336	7.91604	7.12113	4.23107	5.10254	2.19583	1.85851
ENSG00000137960	GIPC2	807.968	-1.89986	0.765528	-2.48176	0.26797	0.0130734	0.0279178	54810	protein_coding	HGNC Symbol	2	GIPC PDZ domain containing family member 2 [Source:HGNC Symbol;Acc:HGNC:18177]	49.6185	27.5994	22.3606	10.1911	9.35807	5.64143	11.9653	1.81522	2.41861
ENSG00000182612	TSPAN10	18.6566	-1.89985	0.688309	-2.76017	0.267972	0.00577717	0.0135565	83882	protein_coding	HGNC Symbol	5	tetraspanin 10 [Source:HGNC Symbol;Acc:HGNC:29942]	0.799554	0.622052	0.893906	0.249324	0.172072	0.14308	0.237328	0.0585556	0.0509181
ENSG00000056050	HPF1	353.514	-1.89908	0.289178	-6.56717	0.268114	5.13e-11	4.7e-10	54969	protein_coding	HGNC Symbol	3	histone PARylation factor 1 [Source:HGNC Symbol;Acc:HGNC:26051]	18.5435	12.7521	12.1908	5.92145	4.57976	3.06599	3.55991	1.55172	1.52754
ENSG00000154429	CCSAP	193.695	-1.89671	0.296758	-6.39144	0.268556	1.64e-10	1.41e-09	126731	protein_coding	HGNC Symbol	4	centriole, cilia and spindle associated protein [Source:HGNC Symbol;Acc:HGNC:29578]	6.27343	9.06886	8.21357	5.81237	7.76971	4.23107	1.58218	1.25895	0.738312
ENSG00000163517	HDAC11	255.31	-1.89312	0.203988	-9.28056	0.269224	1.69e-20	4.65e-19	79885	protein_coding	HGNC Symbol	21	histone deacetylase 11 [Source:HGNC Symbol;Acc:HGNC:19086]	10.3635	10.5094	10.2994	5.04881	4.48711	3.49523	1.99751	1.3175	1.37479
ENSG00000082512	TRAF5	182.588	-1.89191	0.435539	-4.34383	0.269451	1.4e-05	5.75e-05	7188	protein_coding	HGNC Symbol	7	TNF receptor associated factor 5 [Source:HGNC Symbol;Acc:HGNC:12035]	9.22563	6.4988	6.73668	2.07251	2.52813	1.8396	2.27439	0.380611	0.865607
ENSG00000099998	GGT5	4122.88	-1.89158	0.160934	-11.7538	0.269511	6.75e-32	4.7e-30	2687	protein_coding	HGNC Symbol	6	gamma-glutamyltransferase 5 [Source:HGNC Symbol;Acc:HGNC:4260]	189.141	159.049	155.695	99.4491	83.0711	63.65	33.9379	19.6161	22.9386
ENSG00000119711	ALDH6A1	511.879	-1.88412	0.392015	-4.80623	0.27091	1.54e-06	7.49e-06	4329	protein_coding	HGNC Symbol	7	aldehyde dehydrogenase 6 family member A1 [Source:HGNC Symbol;Acc:HGNC:7179]	35.5802	14.6837	12.9552	8.35236	7.30644	4.84427	5.30032	2.25439	2.21494
ENSG00000137193	PIM1	262.224	-1.88391	0.235047	-8.01504	0.270949	1.1e-15	1.79e-14	5292	protein_coding	HGNC Symbol	3	Pim-1 proto-oncogene, serine/threonine kinase [Source:HGNC Symbol;Acc:HGNC:8986]	10.8247	9.51084	11.6726	11.9052	6.75052	6.15243	2.27439	1.46389	1.14566
ENSG00000154556	SORBS2	897.423	-1.88096	0.271519	-6.92756	0.271502	4.28e-12	4.5e-11	8470	protein_coding	HGNC Symbol	65	sorbin and SH3 domain containing 2 [Source:HGNC Symbol;Acc:HGNC:24098]	34.3347	39.1238	35.7951	30.215	29.1066	22.9541	9.55244	3.74756	3.89523
ENSG00000165312	OTUD1	102.046	-1.88064	0.377212	-4.98562	0.271563	6.18e-07	3.21e-06	220213	protein_coding	HGNC Symbol	1	OTU deubiquitinase 1 [Source:HGNC Symbol;Acc:HGNC:27346]	5.42774	3.79779	3.30357	6.43568	5.55925	4.06755	0.969088	0.644112	0.305508
ENSG00000073350	LLGL2	113.16	-1.86786	0.344203	-5.42663	0.273979	5.74e-08	3.52e-07	3993	protein_coding	HGNC Symbol	22	LLGL scribble cell polarity complex component 2 [Source:HGNC Symbol;Acc:HGNC:6629]	3.45961	5.12374	5.15615	1.34012	1.41628	0.919798	1.06797	0.527	0.53464
ENSG00000118523	CCN2	66858	-1.86004	0.350588	-5.30549	0.275469	1.12e-07	6.55e-07	1490	protein_coding	HGNC Symbol	1	cellular communication network factor 2 [Source:HGNC Symbol;Acc:HGNC:2500]	3079.05	2423.01	2630.48	466.844	279.127	254.948	851.037	233.871	248.506
ENSG00000010292	NCAPD2	2980.26	-1.85999	0.276241	-6.73319	0.275479	1.66e-11	1.61e-10	9918	protein_coding	HGNC Symbol	13	non-SMC condensin I complex subunit D2 [Source:HGNC Symbol;Acc:HGNC:24305]	103.635	126.718	130.122	21.099	21.5752	19.0909	13.231	21.1386	19.2216
ENSG00000110446	SLC15A3	101.335	-1.85675	0.440984	-4.21047	0.276098	2.55e-05	9.9e-05	51296	protein_coding	HGNC Symbol	9	solute carrier family 15 member 3 [Source:HGNC Symbol;Acc:HGNC:18068]	5.55075	3.45402	3.44607	9.25616	6.84317	6.78607	1.18664	0.234222	0.53464
ENSG00000184922	FMNL1	103.632	-1.85599	0.314266	-5.90579	0.276243	3.51e-09	2.54e-08	752	protein_coding	HGNC Symbol	12	formin like 1 [Source:HGNC Symbol;Acc:HGNC:1212]	5.33549	3.66683	3.62745	1.05963	0.60887	0.551879	0.791092	0.644112	0.509181
ENSG00000167646	DNAAF3	11.0933	-1.85137	0.782514	-2.36592	0.27713	0.0179852	0.0370252	352909	protein_coding	HGNC Symbol	17	dynein axonemal assembly factor 3 [Source:HGNC Symbol;Acc:HGNC:30492]	0.507409	0.458354	0.388655	0.358403	0.383853	0.24528	0.0988865	0.0585556	0.0509181
ENSG00000154930	ACSS1	228.605	-1.84975	0.421552	-4.38795	0.27744	1.14e-05	4.76e-05	84532	protein_coding	HGNC Symbol	5	acyl-CoA synthetase short chain family member 1 [Source:HGNC Symbol;Acc:HGNC:16091]	13.577	7.31729	7.13829	1.30895	1.24421	1.28772	2.88749	0.849056	0.78923
ENSG00000074219	TEAD2	2190.04	-1.84723	0.213614	-8.64753	0.277925	5.26e-18	1.08e-16	8463	protein_coding	HGNC Symbol	10	TEA domain transcription factor 2 [Source:HGNC Symbol;Acc:HGNC:11715]	91.2107	86.105	88.2117	41.9332	45.3211	32.4382	21.4979	9.80806	10.9983
ENSG00000099953	MMP11	450.75	-1.84391	0.386577	-4.76985	0.278565	1.84e-06	8.85e-06	4320	protein_coding	HGNC Symbol	13	matrix metallopeptidase 11 [Source:HGNC Symbol;Acc:HGNC:7157]	15.13	20.3313	19.0182	19.7278	13.5937	10.1178	5.02344	1.02472	2.77503
ENSG00000064692	SNCAIP	371.268	-1.83895	0.474379	-3.87653	0.279526	0.000105957	0.000363655	9627	protein_coding	HGNC Symbol	22	synuclein alpha interacting protein [Source:HGNC Symbol;Acc:HGNC:11139]	20.0811	12.6866	12.5276	6.12402	6.60492	3.31127	5.47831	1.054	1.06928
ENSG00000021300	PLEKHB1	24.6635	-1.83767	0.606831	-3.02831	0.279772	0.00245924	0.00633753	58473	protein_coding	HGNC Symbol	22	pleckstrin homology domain containing B1 [Source:HGNC Symbol;Acc:HGNC:19079]	1.16858	1.14588	0.660713	0.389569	0.225017	0.2044	0.158218	0.234222	0.0763771
ENSG00000179387	ELMOD2	280.168	-1.8368	0.296744	-6.18983	0.279943	6.02e-10	4.79e-09	255520	protein_coding	HGNC Symbol	8	ELMO domain containing 2 [Source:HGNC Symbol;Acc:HGNC:28111]	13.0081	11.4588	9.62569	3.86452	3.12377	2.044	2.98637	1.054	1.40025
ENSG00000163637	PRICKLE2	283.821	-1.83487	0.325331	-5.64002	0.280316	1.7e-08	1.13e-07	166336	protein_coding	HGNC Symbol	9	prickle planar cell polarity protein 2 [Source:HGNC Symbol;Acc:HGNC:20340]	13.6539	11.6717	9.05566	5.90586	7.4388	5.23263	1.99751	2.43006	0.941984
ENSG00000054654	SYNE2	1322.44	-1.83457	0.224832	-8.15973	0.280376	3.36e-16	5.77e-15	23224	protein_coding	HGNC Symbol	28	spectrin repeat containing nuclear envelope protein 2 [Source:HGNC Symbol;Acc:HGNC:17084]	44.6982	68.3438	46.224	19.4784	37.0087	18.5595	8.93934	7.90501	7.96868
ENSG00000143891	GALM	148.856	-1.83385	0.415016	-4.41875	0.280514	9.93e-06	4.17e-05	130589	protein_coding	HGNC Symbol	5	galactose mutarotase [Source:HGNC Symbol;Acc:HGNC:24063]	9.14875	5.02552	4.0161	2.68023	3.04435	2.08488	1.42397	1.02472	0.432804
ENSG00000254685	FPGT	99.4768	-1.83058	0.302617	-6.04918	0.281151	1.46e-09	1.11e-08	8790	protein_coding	HGNC Symbol	8	fucose-1-phosphate guanylyltransferase [Source:HGNC Symbol;Acc:HGNC:3825]	4.47443	3.83053	3.76995	1.58944	1.9325	1.06288	0.810869	0.409889	0.661935
ENSG00000164985	PSIP1	2705.63	-1.82979	0.17537	-10.4339	0.281305	1.74e-25	7.75e-24	11168	protein_coding	HGNC Symbol	11	PC4 and SFRS1 interacting protein 1 [Source:HGNC Symbol;Acc:HGNC:9527]	129.712	101.116	97.073	47.9014	42.4488	25.5704	21.0233	17.391	13.1114
ENSG00000177721	ANXA2R	282.235	-1.82821	0.283348	-6.45218	0.281613	1.1e-10	9.75e-10	389289	protein_coding	HGNC Symbol	2	annexin A2 receptor [Source:HGNC Symbol;Acc:HGNC:33463]	14.515	9.62543	10.1698	6.07727	6.02252	4.78295	2.63038	1.75667	1.06928
ENSG00000130433	CACNG6	118.084	-1.82766	0.496318	-3.68245	0.28172	0.000231007	0.000738235	59285	protein_coding	HGNC Symbol	3	calcium voltage-gated channel auxiliary subunit gamma 6 [Source:HGNC Symbol;Acc:HGNC:13625]	8.33382	3.22485	2.95378	3.05422	1.72072	1.26728	1.40419	0.527	0.407345
ENSG00000006468	ETV1	273.255	-1.82762	0.321994	-5.67595	0.281729	1.38e-08	9.29e-08	2115	protein_coding	HGNC Symbol	23	ETS variant 1 [Source:HGNC Symbol;Acc:HGNC:3490]	8.27231	10.7713	13.8491	12.8246	18.5176	15.2278	2.3535	0.966167	1.90943
ENSG00000164647	STEAP1	614.466	-1.82199	0.390794	-4.66228	0.282831	3.13e-06	1.44e-05	26872	protein_coding	HGNC Symbol	3	STEAP family member 1 [Source:HGNC Symbol;Acc:HGNC:11378]	40.439	18.285	16.3624	5.51629	3.32231	3.55655	7.11983	2.48861	2.64774
ENSG00000007402	CACNA2D2	16.4848	-1.82137	0.68003	-2.67837	0.282951	0.00739807	0.0169054	9254	protein_coding	HGNC Symbol	8	calcium voltage-gated channel auxiliary subunit alpha2delta 2 [Source:HGNC Symbol;Acc:HGNC:1400]	0.830306	0.540203	0.621848	1.07521	0.886833	0.592759	0.0988865	0.0585556	0.152754
ENSG00000135476	ESPL1	608.8	-1.81706	0.301727	-6.0222	0.283799	1.72e-09	1.3e-08	9700	protein_coding	HGNC Symbol	9	extra spindle pole bodies like 1, separase [Source:HGNC Symbol;Acc:HGNC:16856]	19.2201	25.8479	27.9054	4.64366	5.57249	6.39771	3.02593	5.03578	3.25876
ENSG00000175874	CREG2	24.9341	-1.81203	0.754211	-2.40255	0.28479	0.0162812	0.0339644	200407	protein_coding	HGNC Symbol	3	cellular repressor of E1A stimulated genes 2 [Source:HGNC Symbol;Acc:HGNC:14272]	0.645794	1.09678	1.23074	0.264907	0.622106	0.24528	0.0988865	0.0292778	0.330967
ENSG00000143578	CREB3L4	91.958	-1.808	0.32783	-5.51506	0.285586	3.49e-08	2.19e-07	148327	protein_coding	HGNC Symbol	13	cAMP responsive element binding protein 3 like 4 [Source:HGNC Symbol;Acc:HGNC:18854]	4.3668	3.29033	3.47198	2.89839	2.35606	2.18708	0.810869	0.614834	0.356426
ENSG00000013810	TACC3	1721.66	-1.80778	0.203188	-8.89709	0.28563	5.73e-19	1.36e-17	10460	protein_coding	HGNC Symbol	18	transforming acidic coiled-coil containing protein 3 [Source:HGNC Symbol;Acc:HGNC:11524]	70.4223	64.7589	71.953	9.13149	11.3435	9.42282	9.78977	11.9746	10.591
ENSG00000130787	HIP1R	3935.41	-1.80739	0.176104	-10.2632	0.285708	1.03e-24	4.2e-23	9026	protein_coding	HGNC Symbol	10	huntingtin interacting protein 1 related [Source:HGNC Symbol;Acc:HGNC:18415]	161.187	153.221	159.608	51.8438	56.7705	43.1283	36.766	20.0846	20.2654
ENSG00000099377	HSD3B7	166.32	-1.80514	0.436128	-4.13901	0.286154	3.49e-05	0.00013129	80270	protein_coding	HGNC Symbol	4	hydroxy-delta-5-steroid dehydrogenase, 3 beta- and steroid delta-isomerase 7 [Source:HGNC Symbol;Acc:HGNC:18324]	11.9164	4.76361	3.61449	2.66465	2.44872	2.16664	1.14708	0.878334	1.14566
ENSG00000184898	RBM43	350.376	-1.79965	0.30186	-5.96186	0.287244	2.49e-09	1.84e-08	375287	protein_coding	HGNC Symbol	2	RNA binding motif protein 43 [Source:HGNC Symbol;Acc:HGNC:24790]	19.1432	12.1955	11.1673	8.29003	7.26673	4.51723	3.67858	1.61028	1.65484
ENSG00000071539	TRIP13	937.022	-1.79816	0.268432	-6.69874	0.287541	2.1e-11	2e-10	9319	protein_coding	HGNC Symbol	7	thyroid hormone receptor interactor 13 [Source:HGNC Symbol;Acc:HGNC:12307]	32.6741	36.3082	43.2314	2.60232	2.55461	1.98268	4.64767	7.02667	5.88104
ENSG00000117632	STMN1	5168.44	-1.79662	0.158723	-11.3192	0.287848	1.05e-29	6.41e-28	3925	protein_coding	HGNC Symbol	9	stathmin 1 [Source:HGNC Symbol;Acc:HGNC:6510]	228.842	199.433	194.107	42.2604	36.9425	22.484	46.3184	28.0189	27.0375
ENSG00000173801	JUP	15450	-1.79171	0.700329	-2.55838	0.28883	0.0105161	0.0230871	3728	protein_coding	HGNC Symbol	12	junction plakoglobin [Source:HGNC Symbol;Acc:HGNC:6207]	648.608	593.503	614.606	255.993	253.621	160.965	232.621	35.1334	58.7085
ENSG00000076003	MCM6	1228.82	-1.79125	0.138654	-12.9188	0.288922	3.52e-38	4.08e-36	4175	protein_coding	HGNC Symbol	3	minichromosome maintenance complex component 6 [Source:HGNC Symbol;Acc:HGNC:6949]	48.4653	48.4218	50.6029	29.2956	16.6777	13.5517	9.414	6.99739	7.38312
ENSG00000120055	C10orf95	14.4023	-1.78749	0.720994	-2.4792	0.289676	0.0131678	0.0280975	79946	protein_coding	HGNC Symbol	1	chromosome 10 open reading frame 95 [Source:HGNC Symbol;Acc:HGNC:25880]	0.707298	0.540203	0.466386	0.467483	0.198545	0.408799	0.0593319	0.117111	0.101836
ENSG00000165171	METTL27	47.9163	-1.78573	0.564165	-3.16525	0.29003	0.00154947	0.0041683	155368	protein_coding	HGNC Symbol	3	methyltransferase like 27 [Source:HGNC Symbol;Acc:HGNC:19068]	2.73694	1.78431	1.33438	0.919382	0.900069	0.858478	0.672428	0.146389	0.152754
ENSG00000166886	NAB2	316.228	-1.77982	0.209864	-8.48082	0.29122	2.24e-17	4.27e-16	4665	protein_coding	HGNC Symbol	5	NGFI-A binding protein 2 [Source:HGNC Symbol;Acc:HGNC:7627]	14.6841	12.2282	11.1026	14.4296	12.3495	10.3017	2.53149	2.04945	1.60392
ENSG00000156469	MTERF3	230.357	-1.77677	0.348403	-5.09974	0.291836	3.4e-07	1.84e-06	51001	protein_coding	HGNC Symbol	5	mitochondrial transcription termination factor 3 [Source:HGNC Symbol;Acc:HGNC:24258]	11.0554	8.234	8.5245	3.6152	3.04435	2.26884	2.82815	0.995445	0.865607
ENSG00000175130	MARCKSL1	11800.1	-1.77016	0.242177	-7.30937	0.293176	2.68e-13	3.27e-12	65108	protein_coding	HGNC Symbol	1	MARCKS like 1 [Source:HGNC Symbol;Acc:HGNC:7142]	484.284	467.324	461.294	247.594	239.405	153.259	128.79	51.6168	59.5741
ENSG00000015133	CCDC88C	1359.17	-1.77002	0.17151	-10.3202	0.293205	5.71e-25	2.39e-23	440193	protein_coding	HGNC Symbol	14	coiled-coil domain containing 88C [Source:HGNC Symbol;Acc:HGNC:19967]	58.3982	53.2345	51.3802	35.03	45.8903	30.8235	12.163	6.64606	8.12143
ENSG00000069966	GNB5	597.709	-1.76288	0.248621	-7.09062	0.294659	1.34e-12	1.5e-11	10681	protein_coding	HGNC Symbol	12	G protein subunit beta 5 [Source:HGNC Symbol;Acc:HGNC:4401]	29.8449	21.0188	21.0392	12.5285	11.2773	10.1178	6.0123	2.66428	3.33513
ENSG00000184785	SMIM10	78.083	-1.76223	0.397241	-4.43617	0.294792	9.16e-06	3.9e-05	644538	protein_coding	HGNC Symbol	1	small integral membrane protein 10 [Source:HGNC Symbol;Acc:HGNC:41913]	3.69025	2.99567	2.74649	3.73986	2.11781	2.20752	0.909756	0.409889	0.25459
ENSG00000112559	MDFI	1033.5	-1.76104	0.270788	-6.50337	0.295036	7.85e-11	7.04e-10	4188	protein_coding	HGNC Symbol	9	MyoD family inhibitor [Source:HGNC Symbol;Acc:HGNC:6967]	45.8667	39.9423	38.0623	24.6987	30.7612	19.6632	10.3633	3.63045	6.82302
ENSG00000135929	CYP27A1	217.277	-1.7608	0.494577	-3.5602	0.295085	0.00037057	0.00113733	1593	protein_coding	HGNC Symbol	5	cytochrome P450 family 27 subfamily A member 1 [Source:HGNC Symbol;Acc:HGNC:2605]	13.331	6.62976	6.34803	3.31913	3.16348	2.90247	3.18415	0.849056	0.560099
ENSG00000177191	B3GNT8	332.418	-1.75262	0.265652	-6.59742	0.296763	4.18e-11	3.88e-10	374907	protein_coding	HGNC Symbol	3	UDP-GlcNAc:betaGal beta-1,3-N-acetylglucosaminyltransferase 8 [Source:HGNC Symbol;Acc:HGNC:24139]	13.9307	12.2119	13.6936	7.0434	7.83589	5.78451	3.46103	1.28822	1.96035
ENSG00000005059	MCUB	935.291	-1.75129	0.161695	-10.8308	0.297036	2.46e-27	1.25e-25	55013	protein_coding	HGNC Symbol	5	mitochondrial calcium uniporter dominant negative beta subunit [Source:HGNC Symbol;Acc:HGNC:26076]	35.8569	35.7843	39.8242	14.6945	12.7201	11.2011	7.17916	6.20689	5.11727
ENSG00000007255	TRAPPC6A	259.331	-1.74881	0.432919	-4.03957	0.297548	5.35e-05	0.000194259	79090	protein_coding	HGNC Symbol	5	trafficking protein particle complex 6A [Source:HGNC Symbol;Acc:HGNC:23069]	15.3145	7.6938	8.2913	4.92415	4.50034	3.53611	3.32259	0.673389	1.40025
ENSG00000064393	HIPK2	3945.5	-1.74312	0.188702	-9.23744	0.298722	2.52e-20	6.93e-19	28996	protein_coding	HGNC Symbol	3	homeodomain interacting protein kinase 2 [Source:HGNC Symbol;Acc:HGNC:14402]	144.027	163.158	162.043	69.5614	92.6806	71.5194	24.4843	26.2622	26.1719
ENSG00000165757	JCAD	4017.21	-1.74128	0.22969	-7.58102	0.299104	3.43e-14	4.78e-13	57608	protein_coding	HGNC Symbol	3	junctional cadherin 5 associated [Source:HGNC Symbol;Acc:HGNC:29283]	187.08	153.025	140.084	44.6602	55.9896	32.6017	42.4025	18.7963	21.2074
ENSG00000063180	CA11	209.023	-1.73876	0.261916	-6.63862	0.299627	3.17e-11	2.97e-10	770	protein_coding	HGNC Symbol	4	carbonic anhydrase 11 [Source:HGNC Symbol;Acc:HGNC:1370]	10.6402	7.44825	6.96988	7.0434	4.85772	3.00467	1.79973	1.054	1.32387
ENSG00000049323	LTBP1	2931.62	-1.73744	0.210665	-8.24741	0.2999	1.62e-16	2.85e-15	4052	protein_coding	HGNC Symbol	12	latent transforming growth factor beta binding protein 1 [Source:HGNC Symbol;Acc:HGNC:6714]	131.573	114.179	104.237	69.6237	62.2504	44.9884	30.1208	14.5803	15.3263
ENSG00000176393	RNPEP	1884.93	-1.73679	0.136941	-12.6827	0.300037	7.37e-37	7.47e-35	6051	protein_coding	HGNC Symbol	14	arginyl aminopeptidase [Source:HGNC Symbol;Acc:HGNC:10078]	80.7704	69.0968	74.8549	33.425	33.4349	26.3062	14.9714	10.6278	11.9912
ENSG00000085871	MGST2	1140.65	-1.73265	0.239711	-7.22806	0.300899	4.9e-13	5.79e-12	4258	protein_coding	HGNC Symbol	7	microsomal glutathione S-transferase 2 [Source:HGNC Symbol;Acc:HGNC:7063]	43.3143	46.7194	45.6929	29.2332	27.0021	20.6852	11.9653	4.80156	6.64481
ENSG00000085788	DDHD2	1118.59	-1.72744	0.143381	-12.0479	0.301988	1.99e-33	1.54e-31	23259	protein_coding	HGNC Symbol	24	DDHD domain containing 2 [Source:HGNC Symbol;Acc:HGNC:29106]	45.7899	43.3472	43.8662	10.2846	13.6069	7.9307	8.93934	7.37801	6.13563
ENSG00000130307	USHBP1	175.564	-1.72673	0.328532	-5.25589	0.302136	1.47e-07	8.48e-07	83878	protein_coding	HGNC Symbol	10	USH1 protein network component harmonin binding protein 1 [Source:HGNC Symbol;Acc:HGNC:24058]	7.7034	7.05538	6.24439	10.456	11.4891	8.56434	2.05684	0.93689	0.636476
ENSG00000156313	RPGR	423.757	-1.72157	0.30727	-5.6028	0.303219	2.11e-08	1.38e-07	6103	protein_coding	HGNC Symbol	21	retinitis pigmentosa GTPase regulator [Source:HGNC Symbol;Acc:HGNC:10295]	24.371	13.6033	12.8515	7.57322	4.35474	3.92447	4.46967	2.07872	2.18948
ENSG00000275023	MLLT6	3129.69	-1.72128	0.137679	-12.5021	0.303279	7.27e-36	6.63e-34	4302	protein_coding	HGNC Symbol	11	MLLT6, PHD finger containing [Source:HGNC Symbol;Acc:HGNC:7138]	135.048	123.363	113.902	62.0505	66.5521	46.8688	26.7587	17.4788	19.0688
ENSG00000176182	MYPOP	367.499	-1.71955	0.190746	-9.01487	0.303643	1.97e-19	4.93e-18	339344	protein_coding	HGNC Symbol	1	Myb related transcription factor, partner of profilin [Source:HGNC Symbol;Acc:HGNC:20178]	15.945	13.2595	14.5616	13.744	10.0199	7.74675	3.26326	2.19583	1.9858
ENSG00000162836	ACP6	184.68	-1.719	0.347739	-4.94336	0.303759	7.68e-07	3.93e-06	51205	protein_coding	HGNC Symbol	10	acid phosphatase 6, lysophosphatidic [Source:HGNC Symbol;Acc:HGNC:29609]	9.85604	5.74579	6.51645	1.94784	2.06486	1.65564	1.97773	1.20039	0.636476
ENSG00000109654	TRIM2	407.617	-1.71793	0.220864	-7.77823	0.303984	7.35e-15	1.1e-13	23321	protein_coding	HGNC Symbol	12	tripartite motif containing 2 [Source:HGNC Symbol;Acc:HGNC:15974]	17.0982	16.0424	15.4166	22.6729	25.7181	17.4353	4.15323	2.19583	2.01126
ENSG00000266074	BAHCC1	665.704	-1.71313	0.250836	-6.8297	0.304997	8.51e-12	8.62e-11	57597	protein_coding	HGNC Symbol	8	BAH domain and coiled-coil containing 1 [Source:HGNC Symbol;Acc:HGNC:29279]	29.5681	24.2109	25.4958	16.767	19.8015	11.569	7.39671	3.10345	3.36059
ENSG00000005189	REXO5	92.2411	-1.71057	0.343369	-4.98172	0.305539	6.3e-07	3.27e-06	81691	protein_coding	HGNC Symbol	19	RNA exonuclease 5 [Source:HGNC Symbol;Acc:HGNC:24661]	4.95109	3.15937	2.91491	1.4492	0.807415	0.551879	0.810869	0.527	0.53464
ENSG00000099204	ABLIM1	7020.51	-1.70987	0.155944	-10.9647	0.305687	5.65e-28	3.01e-26	3983	protein_coding	HGNC Symbol	17	actin binding LIM protein 1 [Source:HGNC Symbol;Acc:HGNC:78]	313.425	281.577	239.088	94.1822	105.652	70.7223	62.6347	39.6129	41.2436
ENSG00000174606	ANGEL2	483.847	-1.70937	0.265073	-6.44868	0.305794	1.13e-10	9.95e-10	90806	protein_coding	HGNC Symbol	8	angel homolog 2 [Source:HGNC Symbol;Acc:HGNC:30534]	23.4023	17.2537	17.0231	7.63555	7.63735	5.47791	4.78611	1.90306	3.25876
ENSG00000179981	TSHZ1	1094.34	-1.70764	0.179635	-9.50617	0.306161	1.98e-21	5.74e-20	10194	protein_coding	HGNC Symbol	5	teashirt zinc finger homeobox 1 [Source:HGNC Symbol;Acc:HGNC:10669]	51.7558	38.4362	40.0315	41.045	51.9393	43.4554	9.8491	6.00195	6.51751
ENSG00000136492	BRIP1	201.9	-1.70598	0.371525	-4.59183	0.306513	4.39e-06	1.96e-05	83990	protein_coding	HGNC Symbol	6	BRCA1 interacting protein C-terminal helicase 1 [Source:HGNC Symbol;Acc:HGNC:20473]	8.87198	7.43188	7.55286	1.52711	1.77367	1.24684	0.771315	1.90306	1.27295
ENSG00000020181	ADGRA2	5070.6	-1.70176	0.197131	-8.63266	0.307411	5.99e-18	1.22e-16	25960	protein_coding	HGNC Symbol	3	adhesion G protein-coupled receptor A2 [Source:HGNC Symbol;Acc:HGNC:17849]	249.107	189.251	164.595	111.354	130.457	73.87	47.2678	26.4964	30.7291
ENSG00000013016	EHD3	350.492	-1.69714	0.194392	-8.73052	0.308396	2.54e-18	5.41e-17	30845	protein_coding	HGNC Symbol	1	EH domain containing 3 [Source:HGNC Symbol;Acc:HGNC:3244]	14.3458	14.2908	12.9293	11.0014	8.47124	6.90871	3.16437	1.8445	2.16402
ENSG00000163251	FZD5	239.277	-1.697	0.322456	-5.26272	0.308427	1.42e-07	8.19e-07	7855	protein_coding	HGNC Symbol	1	frizzled class receptor 5 [Source:HGNC Symbol;Acc:HGNC:4043]	12.3931	8.64324	7.52695	1.97901	2.30312	1.77828	2.68971	0.93689	1.37479
ENSG00000184058	TBX1	733.514	-1.69551	0.244088	-6.94629	0.308746	3.75e-12	3.96e-11	6899	protein_coding	HGNC Symbol	6	T-box 1 [Source:HGNC Symbol;Acc:HGNC:11592]	27.3847	29.1546	30.2503	11.017	10.867	8.6461	7.81204	3.13272	4.37895
ENSG00000110237	ARHGEF17	2398.38	-1.69273	0.219714	-7.70426	0.309341	1.32e-14	1.91e-13	9828	protein_coding	HGNC Symbol	7	Rho guanine nucleotide exchange factor 17 [Source:HGNC Symbol;Acc:HGNC:21726]	112.876	87.12	84.6231	47.9326	55.6719	33.6033	25.2952	12.9993	12.0167
ENSG00000120341	SEC16B	23.7537	-1.69013	0.663846	-2.54596	0.3099	0.0108977	0.0237976	89866	protein_coding	HGNC Symbol	8	SEC16 homolog B, endoplasmic reticulum export factor [Source:HGNC Symbol;Acc:HGNC:30301]	1.42997	0.703901	0.738444	0.17141	0.119127	0.327039	0.336214	0.0878334	0.0763771
ENSG00000072135	PTPN18	1213.67	-1.6874	0.218426	-7.72529	0.310486	1.12e-14	1.63e-13	26469	protein_coding	HGNC Symbol	16	protein tyrosine phosphatase, non-receptor type 18 [Source:HGNC Symbol;Acc:HGNC:9649]	63.4262	39.6803	41.1326	16.4242	12.8657	8.66654	10.6402	6.47039	7.8923
ENSG00000088970	KIZ	146.897	-1.68547	0.326025	-5.16975	0.310902	2.34e-07	1.3e-06	55857	protein_coding	HGNC Symbol	15	kizuna centrosomal protein [Source:HGNC Symbol;Acc:HGNC:15865]	8.16468	4.61628	4.74159	3.6152	3.25613	2.73895	1.44374	0.761223	0.840148
ENSG00000087245	MMP2	28864.9	-1.6853	0.223565	-7.53828	0.310939	4.76e-14	6.5e-13	4313	protein_coding	HGNC Symbol	8	matrix metallopeptidase 2 [Source:HGNC Symbol;Acc:HGNC:7166]	1070.13	1179.79	1153.64	559.67	648.883	441.033	308.091	131.896	169.048
ENSG00000165716	DIPK1B	5854.27	-1.6852	0.315809	-5.33614	0.31096	9.49e-08	5.6e-07	138311	protein_coding	HGNC Symbol	2	divergent protein kinase domain 1B [Source:HGNC Symbol;Acc:HGNC:28290]	284.518	202.183	207.49	51.5166	53.2364	35.913	74.6593	22.5146	29.227
ENSG00000272325	NUDT3	2781.95	-1.68341	0.152438	-11.0432	0.311345	2.36e-28	1.29e-26	11165	protein_coding	HGNC Symbol	1	nudix hydrolase 3 [Source:HGNC Symbol;Acc:HGNC:8050]	130.358	101.542	97.5653	28.1113	30.0597	16.7812	23.2581	16.9518	17.0066
ENSG00000136720	HS6ST1	911.954	-1.68336	0.190916	-8.81725	0.311358	1.17e-18	2.65e-17	9394	protein_coding	HGNC Symbol	4	heparan sulfate 6-O-sulfotransferase 1 [Source:HGNC Symbol;Acc:HGNC:5201]	37.7174	34.0983	35.7433	26.0388	23.6003	18.0894	5.79475	6.49967	6.11017
ENSG00000053254	FOXN3	1393.88	-1.68205	0.191363	-8.78984	0.31164	1.5e-18	3.33e-17	1112	protein_coding	HGNC Symbol	19	forkhead box N3 [Source:HGNC Symbol;Acc:HGNC:1928]	66.609	51.2374	47.3641	34.5158	41.7208	24.2622	13.1124	7.46584	8.40148
ENSG00000157613	CREB3L1	287.68	-1.68091	0.403882	-4.16189	0.311885	3.16e-05	0.000119733	90993	protein_coding	HGNC Symbol	6	cAMP responsive element binding protein 3 like 1 [Source:HGNC Symbol;Acc:HGNC:18856]	6.13504	13.5542	14.0304	12.7934	12.7466	9.13666	3.44125	1.11256	1.57846
ENSG00000051128	HOMER3	4208.7	-1.67935	0.245088	-6.85203	0.312223	7.28e-12	7.46e-11	9454	protein_coding	HGNC Symbol	12	homer scaffold protein 3 [Source:HGNC Symbol;Acc:HGNC:17514]	176.84	156.315	163.961	45.9535	41.1517	30.0263	48.1182	18.972	22.6585
ENSG00000079156	OSBPL6	294.626	-1.67777	0.276987	-6.05721	0.312566	1.39e-09	1.06e-08	114880	protein_coding	HGNC Symbol	9	oxysterol binding protein like 6 [Source:HGNC Symbol;Acc:HGNC:16388]	10.5018	12.572	11.4912	8.24328	8.57713	6.60211	1.76018	2.60572	1.60392
ENSG00000079950	STX7	1196.92	-1.67719	0.195634	-8.57307	0.312692	1.01e-17	2e-16	8417	protein_coding	HGNC Symbol	4	syntaxin 7 [Source:HGNC Symbol;Acc:HGNC:11442]	54.8156	45.3279	41.5213	19.3226	21.0722	12.8363	11.9257	6.61678	6.54297
ENSG00000136059	VILL	170.311	-1.67388	0.476778	-3.51082	0.313409	0.000446734	0.00134792	50853	protein_coding	HGNC Symbol	11	villin like [Source:HGNC Symbol;Acc:HGNC:30906]	8.64134	5.10737	6.50349	2.68023	3.2429	2.69807	2.47216	0.907612	0.356426
ENSG00000112167	SAYSD1	185.669	-1.67371	0.242115	-6.91289	0.313445	4.75e-12	4.97e-11	55776	protein_coding	HGNC Symbol	3	SAYSVFN motif domain containing 1 [Source:HGNC Symbol;Acc:HGNC:21025]	7.34975	6.61339	7.96742	2.74256	2.59432	1.533	1.68107	0.93689	1.22203
ENSG00000165194	PCDH19	279.455	-1.6735	0.306806	-5.45456	0.313493	4.91e-08	3.04e-07	57526	protein_coding	HGNC Symbol	5	protocadherin 19 [Source:HGNC Symbol;Acc:HGNC:14270]	7.11911	13.0467	12.5017	5.82795	8.81538	4.68075	2.01729	2.04945	1.65484
ENSG00000099260	PALMD	4287.76	-1.67312	0.299859	-5.57969	0.313575	2.41e-08	1.56e-07	54873	protein_coding	HGNC Symbol	5	palmdelphin [Source:HGNC Symbol;Acc:HGNC:15846]	241.45	136.131	131.715	48.3689	45.9167	30.3329	49.9179	20.5823	21.462
ENSG00000184588	PDE4B	1898.62	-1.67223	0.641412	-2.60711	0.313767	0.00913089	0.0203396	5142	protein_coding	HGNC Symbol	18	phosphodiesterase 4B [Source:HGNC Symbol;Acc:HGNC:8781]	98.2529	63.2856	63.4673	16.5489	10.1787	8.89138	29.8835	6.851	5.88104
ENSG00000143776	CDC42BPA	6492.19	-1.67204	0.134113	-12.4674	0.313809	1.12e-35	9.72e-34	8476	protein_coding	HGNC Symbol	13	CDC42 binding protein kinase alpha [Source:HGNC Symbol;Acc:HGNC:1737]	284.887	250.327	230.978	66.6007	83.3358	49.7509	49.7795	42.8334	40.6581
ENSG00000051825	MPHOSPH9	420.138	-1.66981	0.256443	-6.51145	0.314294	7.44e-11	6.7e-10	10198	protein_coding	HGNC Symbol	24	M-phase phosphoprotein 9 [Source:HGNC Symbol;Acc:HGNC:7215]	21.2958	14.3236	14.1729	8.32119	9.90076	7.17443	4.13346	2.78139	1.90943
ENSG00000143995	MEIS1	266.885	-1.66766	0.276595	-6.02926	0.314763	1.65e-09	1.24e-08	4211	protein_coding	HGNC Symbol	17	Meis homeobox 1 [Source:HGNC Symbol;Acc:HGNC:7000]	12.5161	9.57632	9.40545	5.3293	5.90339	4.21063	2.19528	2.25439	1.09474
ENSG00000112406	HECA	778.284	-1.66107	0.214735	-7.73544	0.316204	1.03e-14	1.51e-13	51696	protein_coding	HGNC Symbol	1	hdc homolog, cell cycle regulator [Source:HGNC Symbol;Acc:HGNC:21041]	36.8871	28.6471	26.4156	16.6268	12.601	10.1178	7.73293	4.83084	3.86977
ENSG00000109265	KIAA1211	317.318	-1.65816	0.399778	-4.1477	0.316843	3.36e-05	0.000126582	57482	protein_coding	HGNC Symbol	9	KIAA1211 [Source:HGNC Symbol;Acc:HGNC:29219]	14.5765	10.9023	12.0483	5.0644	6.06223	3.59743	4.64767	1.25895	1.1202
ENSG00000163913	IFT122	804.905	-1.65767	0.243261	-6.81438	0.31695	9.47e-12	9.53e-11	55764	protein_coding	HGNC Symbol	32	intraflagellar transport 122 [Source:HGNC Symbol;Acc:HGNC:13556]	37.5175	27.9268	29.6155	8.9445	8.458	7.21531	8.95912	4.01106	4.25166
ENSG00000021574	SPAST	629.199	-1.65358	0.19777	-8.36115	0.31785	6.21e-17	1.13e-15	6683	protein_coding	HGNC Symbol	21	spastin [Source:HGNC Symbol;Acc:HGNC:11233]	28.3227	23.8508	22.0367	10.4404	14.4805	7.31751	6.24963	3.51334	3.53881
ENSG00000099250	NRP1	11914.2	-1.65244	0.164578	-10.0405	0.318101	1.01e-23	3.78e-22	8829	protein_coding	HGNC Symbol	14	neuropilin 1 [Source:HGNC Symbol;Acc:HGNC:8004]	409.31	493.86	492.218	91.7045	109.2	75.8118	88.543	76.2687	81.2907
ENSG00000079150	FKBP7	464.162	-1.64117	0.251312	-6.53041	0.320596	6.56e-11	5.93e-10	51661	protein_coding	HGNC Symbol	8	FKBP prolyl isomerase 7 [Source:HGNC Symbol;Acc:HGNC:3723]	20.2656	16.599	17.7874	6.37335	6.35343	3.88359	5.30032	2.34222	2.36769
ENSG00000092036	HAUS4	151.473	-1.64077	0.329175	-4.98451	0.320685	6.21e-07	3.23e-06	54930	protein_coding	HGNC Symbol	21	HAUS augmin like complex subunit 4 [Source:HGNC Symbol;Acc:HGNC:20163]	8.31844	5.2547	4.33998	1.69852	1.68101	1.47168	1.4833	0.995445	0.738312
ENSG00000165511	C10orf25	66.9318	-1.64005	0.373986	-4.38532	0.320846	1.16e-05	4.81e-05	220979	antisense	HGNC Symbol	1	chromosome 10 open reading frame 25 [Source:HGNC Symbol;Acc:HGNC:23509]	2.98295	2.38999	2.53921	1.41803	1.3501	0.919798	0.692206	0.234222	0.483722
ENSG00000157399	ARSE	150.271	-1.63794	0.254487	-6.43622	0.321316	1.22e-10	1.07e-09	415	protein_coding	HGNC Symbol	6	arylsulfatase E [Source:HGNC Symbol;Acc:HGNC:719]	6.19655	6.02408	5.33753	4.55016	3.36202	4.00623	1.08775	1.17111	0.891066
ENSG00000137834	SMAD6	330.488	-1.63735	0.333817	-4.90492	0.321447	9.35e-07	4.71e-06	4091	protein_coding	HGNC Symbol	5	SMAD family member 6 [Source:HGNC Symbol;Acc:HGNC:6772]	10.0406	13.7342	14.6652	23.53	17.922	13.0203	1.52285	2.635	2.5459
ENSG00000089057	SLC23A2	1308.99	-1.63645	0.153936	-10.6307	0.321646	2.14e-26	1.04e-24	9962	protein_coding	HGNC Symbol	5	solute carrier family 23 member 2 [Source:HGNC Symbol;Acc:HGNC:10973]	54.3236	48.7001	50.3178	16.9852	23.1635	17.1696	9.71066	8.25634	9.31801
ENSG00000182158	CREB3L2	5186.16	-1.63333	0.157761	-10.3532	0.322343	4.05e-25	1.72e-23	64764	protein_coding	HGNC Symbol	8	cAMP responsive element binding protein 3 like 2 [Source:HGNC Symbol;Acc:HGNC:23720]	178.885	209.271	217.478	76.4957	98.2399	70.2521	45.4285	30.6539	33.6314
ENSG00000165304	MELK	681.513	-1.63193	0.230633	-7.07588	0.322657	1.49e-12	1.66e-11	9833	protein_coding	HGNC Symbol	14	maternal embryonic leucine zipper kinase [Source:HGNC Symbol;Acc:HGNC:16870]	27.7384	26.0607	25.8455	9.00683	7.21379	6.72475	4.03457	5.56278	4.45533
ENSG00000163412	EIF4E3	331.534	-1.63097	0.222664	-7.32482	0.32287	2.39e-13	2.95e-12	317649	protein_coding	HGNC Symbol	10	eukaryotic translation initiation factor 4E family member 3 [Source:HGNC Symbol;Acc:HGNC:31837]	16.2217	11.3443	11.3617	4.26967	3.37526	1.8396	2.55127	2.16656	2.24039
ENSG00000167642	SPINT2	114.124	-1.63012	0.686623	-2.37411	0.323062	0.0175915	0.0363195	10653	protein_coding	HGNC Symbol	11	serine peptidase inhibitor, Kunitz type 2 [Source:HGNC Symbol;Acc:HGNC:11247]	8.50295	2.6028	2.52626	2.05692	1.65454	0.838038	2.05684	0.409889	0.178213
ENSG00000176438	SYNE3	792.412	-1.62952	0.179301	-9.0882	0.323196	1.01e-19	2.57e-18	161176	protein_coding	HGNC Symbol	5	spectrin repeat containing nuclear envelope family member 3 [Source:HGNC Symbol;Acc:HGNC:19861]	33.4121	31.2172	28.2552	46.2496	55.341	47.482	7.08027	4.12817	5.57553
ENSG00000121297	TSHZ3	289.791	-1.62792	0.245111	-6.64157	0.323554	3.1e-11	2.91e-10	57616	protein_coding	HGNC Symbol	4	teashirt zinc finger homeobox 3 [Source:HGNC Symbol;Acc:HGNC:30700]	11.8088	11.9336	10.2475	10.0509	13.5275	9.91338	2.7886	1.25895	2.1131
ENSG00000023171	GRAMD1B	232.403	-1.62726	0.351524	-4.62915	0.323703	3.67e-06	1.66e-05	57476	protein_coding	HGNC Symbol	18	GRAM domain containing 1B [Source:HGNC Symbol;Acc:HGNC:29214]	12.6699	7.89023	6.9051	9.44315	8.94774	6.49991	2.88749	1.054	1.14566
ENSG00000119950	MXI1	203.67	-1.62392	0.263386	-6.16556	0.324452	7.02e-10	5.54e-09	4601	protein_coding	HGNC Symbol	38	MAX interactor 1, dimerization protein [Source:HGNC Symbol;Acc:HGNC:7534]	8.39532	7.80839	7.61764	3.21005	4.03707	2.92291	1.58218	0.93689	1.75667
ENSG00000120896	SORBS3	5178.78	-1.62341	0.130133	-12.475	0.324567	1.02e-35	8.93e-34	10174	protein_coding	HGNC Symbol	22	sorbin and SH3 domain containing 3 [Source:HGNC Symbol;Acc:HGNC:30907]	208.899	185.944	210.483	95.7249	76.2544	62.0148	40.9786	35.3676	32.7912
ENSG00000156162	DPY19L4	842.736	-1.61554	0.186356	-8.66912	0.326343	4.35e-18	9.05e-17	286148	protein_coding	HGNC Symbol	8	dpy-19 like 4 [Source:HGNC Symbol;Acc:HGNC:27829]	40.5159	30.1695	28.035	12.996	14.3217	7.48103	6.78362	5.44567	5.62645
ENSG00000110583	NAA40	687.049	-1.61292	0.158544	-10.1733	0.326937	2.61e-24	1.02e-22	79829	protein_coding	HGNC Symbol	10	N(alpha)-acetyltransferase 40, NatD catalytic subunit [Source:HGNC Symbol;Acc:HGNC:25845]	29.7065	26.5518	24.0318	7.35506	9.186	6.58167	5.8343	4.42095	4.37895
ENSG00000143321	HDGF	6757.28	-1.61137	0.140963	-11.4312	0.327287	2.92e-30	1.85e-28	3068	protein_coding	HGNC Symbol	10	heparin binding growth factor [Source:HGNC Symbol;Acc:HGNC:4856]	268.004	252.815	267.42	69.6393	48.0875	39.1425	64.2367	42.4528	38.9778
ENSG00000154096	THY1	19.7082	-1.60986	0.684483	-2.35193	0.327631	0.0186761	0.0382099	7070	protein_coding	HGNC Symbol	10	Thy-1 cell surface antigen [Source:HGNC Symbol;Acc:HGNC:11801]	0.599666	0.622052	1.04937	0.062331	0.0132363	0.0613199	0.138441	0.234222	0.0509181
ENSG00000099910	KLHL22	437.277	-1.60839	0.262823	-6.11967	0.327963	9.38e-10	7.31e-09	84861	protein_coding	HGNC Symbol	12	kelch like family member 22 [Source:HGNC Symbol;Acc:HGNC:25888]	23.5715	13.6688	14.147	7.77579	9.39778	7.84895	4.35101	2.43006	2.6732
ENSG00000121775	TMEM39B	1332.9	-1.6081	0.143516	-11.205	0.328031	3.85e-29	2.21e-27	55116	protein_coding	HGNC Symbol	9	transmembrane protein 39B [Source:HGNC Symbol;Acc:HGNC:25510]	56.0764	49.7478	49.8256	12.7779	14.1496	11.753	12.341	8.37345	7.94322
ENSG00000110799	VWF	103705	-1.60583	0.337718	-4.75495	0.328546	1.98e-06	9.45e-06	7450	protein_coding	HGNC Symbol	9	von Willebrand factor [Source:HGNC Symbol;Acc:HGNC:12726]	3697.43	4767.71	3593.66	980.981	1766.97	927.749	1404.56	367.407	569.519
ENSG00000137497	NUMA1	6077.36	-1.60004	0.126687	-12.6299	0.329868	1.44e-36	1.41e-34	4926	protein_coding	HGNC Symbol	34	nuclear mitotic apparatus protein 1 [Source:HGNC Symbol;Acc:HGNC:8059]	224.69	243.55	238.232	97.0494	127.333	90.549	50.5903	40.4326	39.0287
ENSG00000075239	ACAT1	1370.73	-1.6	0.172296	-9.28634	0.329877	1.6e-20	4.42e-19	38	protein_coding	HGNC Symbol	12	acetyl-CoA acetyltransferase 1 [Source:HGNC Symbol;Acc:HGNC:93]	52.4784	53.611	53.2069	17.0164	19.1397	15.4935	9.63155	10.1887	9.16525
ENSG00000184500	PROS1	278.979	-1.59349	0.39125	-4.07281	0.331369	4.64e-05	0.000170382	5627	protein_coding	HGNC Symbol	12	protein S [Source:HGNC Symbol;Acc:HGNC:9456]	15.3607	9.05249	8.36903	12.5285	11.8333	6.21375	3.87635	1.054	1.37479
ENSG00000163528	CHCHD4	232.721	-1.59336	0.21901	-7.27528	0.331398	3.46e-13	4.14e-12	131474	protein_coding	HGNC Symbol	3	coiled-coil-helix-coiled-coil-helix domain containing 4 [Source:HGNC Symbol;Acc:HGNC:26467]	9.79454	8.9379	8.43381	2.85164	2.84581	2.43236	2.31394	1.43461	1.29841
ENSG00000164611	PTTG1	1847.39	-1.59148	0.166056	-9.58402	0.33183	9.33e-22	2.76e-20	9232	protein_coding	HGNC Symbol	7	pituitary tumor-transforming 1 [Source:HGNC Symbol;Acc:HGNC:9690]	65.5019	69.2114	79.5188	15.9412	14.5996	13.4495	14.2792	12.2967	12.8823
ENSG00000183763	TRAIP	98.2129	-1.59086	0.381682	-4.16803	0.331973	3.07e-05	0.000116769	10293	protein_coding	HGNC Symbol	11	TRAF interacting protein [Source:HGNC Symbol;Acc:HGNC:30764]	3.58262	3.27396	4.46953	0.560979	0.622106	0.776719	0.553765	1.02472	0.509181
ENSG00000004660	CAMKK1	104.904	-1.58724	0.293885	-5.40089	0.332807	6.63e-08	4.03e-07	84254	protein_coding	HGNC Symbol	4	calcium/calmodulin dependent protein kinase kinase 1 [Source:HGNC Symbol;Acc:HGNC:1469]	3.90552	4.5508	3.757	4.83065	6.77699	4.70119	1.0482	0.644112	0.585558
ENSG00000142156	COL6A1	2788.95	-1.58645	0.133322	-11.8993	0.332991	1.19e-32	8.67e-31	1291	protein_coding	HGNC Symbol	7	collagen type VI alpha 1 chain [Source:HGNC Symbol;Acc:HGNC:2211]	115.843	109.121	99.3143	131.908	136.956	108.311	25.3347	17.069	18.1014
ENSG00000081320	STK17B	307.687	-1.58388	0.333638	-4.7473	0.333584	2.06e-06	9.77e-06	9262	protein_coding	HGNC Symbol	5	serine/threonine kinase 17b [Source:HGNC Symbol;Acc:HGNC:11396]	18.3282	9.28167	8.47268	8.11861	6.40637	4.84427	2.74905	1.49317	2.41861
ENSG00000166801	FAM111A	617.111	-1.58352	0.265578	-5.96255	0.333666	2.48e-09	1.83e-08	63901	protein_coding	HGNC Symbol	11	family with sequence similarity 111 member A [Source:HGNC Symbol;Acc:HGNC:24725]	31.2595	19.8729	21.0003	15.1464	13.5672	8.4417	7.00117	3.07417	3.61518
ENSG00000050426	LETMD1	428.988	-1.57825	0.26704	-5.91017	0.334887	3.42e-09	2.48e-08	25875	protein_coding	HGNC Symbol	38	LETM1 domain containing 1 [Source:HGNC Symbol;Acc:HGNC:24241]	23.6484	13.8816	12.6183	13.0428	11.3038	6.29551	3.91591	2.54717	2.87687
ENSG00000142197	DOP1B	540.359	-1.57647	0.215376	-7.31964	0.335301	2.49e-13	3.07e-12	9980	protein_coding	HGNC Symbol	4	DOP1 leucine zipper like protein B [Source:HGNC Symbol;Acc:HGNC:1291]	22.2953	21.5263	19.0182	6.43568	8.35211	5.74363	5.89364	2.8985	3.15692
ENSG00000091879	ANGPT2	2502.08	-1.57453	0.62838	-2.50569	0.335754	0.0122213	0.0263316	285	protein_coding	HGNC Symbol	4	angiopoietin 2 [Source:HGNC Symbol;Acc:HGNC:485]	127.775	77.7073	86.1777	8.99125	11.7274	7.50147	40.9984	8.78334	9.21617
ENSG00000184481	FOXO4	401.057	-1.57181	0.187702	-8.37398	0.336385	5.57e-17	1.03e-15	4303	protein_coding	HGNC Symbol	4	forkhead box O4 [Source:HGNC Symbol;Acc:HGNC:7139]	17.744	15.1093	13.6677	12.7623	11.8862	8.35994	3.24348	2.75211	2.69866
ENSG00000156795	WDYHV1	211.87	-1.57107	0.321505	-4.88662	0.336558	1.03e-06	5.14e-06	55093	protein_coding	HGNC Symbol	10	WDYHV motif containing 1 [Source:HGNC Symbol;Acc:HGNC:25490]	10.5172	7.61195	6.63304	3.14772	2.62079	2.3506	2.63038	1.02472	1.09474
ENSG00000087253	LPCAT2	2350.11	-1.56722	0.214828	-7.29524	0.337458	2.98e-13	3.61e-12	54947	protein_coding	HGNC Symbol	8	lysophosphatidylcholine acyltransferase 2 [Source:HGNC Symbol;Acc:HGNC:26032]	101.051	89.4608	82.1228	32.4277	38.6235	22.4431	26.7191	13.4092	12.5768
ENSG00000163322	ABRAXAS1	294.337	-1.56287	0.300786	-5.19597	0.338476	2.04e-07	1.15e-06	84142	protein_coding	HGNC Symbol	9	abraxas 1, BRCA1 A complex subunit [Source:HGNC Symbol;Acc:HGNC:25829]	13.8846	10.8695	9.535	5.48513	5.73132	3.24995	3.6588	1.34678	1.62938
ENSG00000175215	CTDSP2	7387.95	-1.55987	0.20918	-7.45706	0.339183	8.85e-14	1.17e-12	10106	protein_coding	HGNC Symbol	8	CTD small phosphatase 2 [Source:HGNC Symbol;Acc:HGNC:17077]	327.033	267.188	261.642	90.193	82.2107	61.2177	46.6151	56.2427	54.7369
ENSG00000164087	POC1A	313.764	-1.55762	0.208042	-7.48705	0.339711	7.04e-14	9.47e-13	25886	protein_coding	HGNC Symbol	3	POC1 centriolar protein A [Source:HGNC Symbol;Acc:HGNC:24488]	11.04	13.014	12.0613	1.86993	1.82661	1.49212	2.41283	2.28367	2.13856
ENSG00000100105	PATZ1	825.856	-1.55705	0.158714	-9.81043	0.339846	1.02e-22	3.34e-21	23598	protein_coding	HGNC Symbol	6	POZ/BTB and AT hook containing zinc finger 1 [Source:HGNC Symbol;Acc:HGNC:13071]	36.4566	28.7453	30.4187	16.8917	19.1	15.2687	7.11983	5.73845	5.24456
ENSG00000158156	XKR8	532.335	-1.55525	0.158897	-9.7878	0.340269	1.27e-22	4.12e-21	55113	protein_coding	HGNC Symbol	2	XK related 8 [Source:HGNC Symbol;Acc:HGNC:25508]	20.7577	19.8893	20.8449	13.6037	14.4011	12.0596	4.76633	3.63045	3.30967
ENSG00000018408	WWTR1	13013.7	-1.55485	0.162118	-9.59085	0.340364	8.74e-22	2.61e-20	25937	protein_coding	HGNC Symbol	12	WW domain containing transcription regulator 1 [Source:HGNC Symbol;Acc:HGNC:24042]	503.412	504.058	495.211	150.14	160.225	110.11	134.565	75.2732	80.756
ENSG00000163535	SGO2	342.7	-1.55378	0.347578	-4.47031	0.340616	7.81e-06	3.36e-05	151246	protein_coding	HGNC Symbol	6	shugoshin 2 [Source:HGNC Symbol;Acc:HGNC:30812]	14.761	12.7848	11.9835	1.74527	2.21046	1.75784	1.44374	3.27911	2.49499
ENSG00000090006	LTBP4	2264.72	-1.55301	0.159893	-9.71279	0.340798	2.66e-22	8.37e-21	8425	protein_coding	HGNC Symbol	39	latent transforming growth factor beta binding protein 4 [Source:HGNC Symbol;Acc:HGNC:6717]	80.9856	91.1633	88.8206	65.3073	74.5866	43.7415	18.2347	14.2583	16.9048
ENSG00000154529	CNTNAP3B	1268.09	-1.55066	0.223363	-6.94231	0.341354	3.86e-12	4.07e-11	728577	protein_coding	HGNC Symbol	15	contactin associated protein like 3B [Source:HGNC Symbol;Acc:HGNC:32035]	53.0781	45.6389	47.973	13.4947	12.826	9.11622	14.7736	7.26089	6.67027
ENSG00000110852	CLEC2B	217.564	-1.54855	0.415814	-3.72415	0.341853	0.000195977	0.000634685	9976	protein_coding	HGNC Symbol	4	C-type lectin domain family 2 member B [Source:HGNC Symbol;Acc:HGNC:2053]	10.2404	7.56284	7.50104	8.78867	7.3991	6.15243	3.38192	0.790501	0.916525
ENSG00000130052	STARD8	488.233	-1.54724	0.198358	-7.80024	0.342163	6.18e-15	9.38e-14	9754	protein_coding	HGNC Symbol	5	StAR related lipid transfer domain containing 8 [Source:HGNC Symbol;Acc:HGNC:19161]	20.3118	18.9071	17.2692	27.1452	29.3846	22.4226	4.94433	2.57645	3.33513
ENSG00000156928	MALSU1	712.844	-1.54349	0.232165	-6.64822	0.343056	2.97e-11	2.79e-10	115416	protein_coding	HGNC Symbol	5	mitochondrial assembly of ribosomal large subunit 1 [Source:HGNC Symbol;Acc:HGNC:21721]	30.3369	25.3077	26.8042	14.0245	12.2039	9.91338	8.20758	3.51334	4.40441
ENSG00000178585	CTNNBIP1	996.743	-1.54303	0.348544	-4.42707	0.343165	9.55e-06	4.04e-05	56998	protein_coding	HGNC Symbol	4	catenin beta interacting protein 1 [Source:HGNC Symbol;Acc:HGNC:16913]	41.4846	37.8142	35.8469	12.4039	13.0775	8.9527	14.5165	3.65972	5.14272
ENSG00000176723	ZNF843	26.8024	-1.53662	0.566387	-2.71302	0.344692	0.00666723	0.0154248	283933	protein_coding	HGNC Symbol	3	zinc finger protein 843 [Source:HGNC Symbol;Acc:HGNC:28710]	1.52223	0.818489	0.751399	0.685641	0.410326	0.16352	0.177996	0.234222	0.178213
ENSG00000110274	CEP164	1035.84	-1.53641	0.171128	-8.97816	0.344741	2.75e-19	6.75e-18	22897	protein_coding	HGNC Symbol	14	centrosomal protein 164 [Source:HGNC Symbol;Acc:HGNC:29182]	41.8843	37.9288	39.6558	13.3233	16.6116	12.3457	10.7589	6.11906	6.39022
ENSG00000142065	ZFP14	87.0404	-1.535	0.381516	-4.02342	0.345079	5.74e-05	0.000206943	57677	protein_coding	HGNC Symbol	2	ZFP14 zinc finger protein [Source:HGNC Symbol;Acc:HGNC:29312]	4.45905	2.70101	2.92787	2.58674	3.45468	2.39148	0.751538	0.351334	0.814689
ENSG00000131089	ARHGEF9	255.193	-1.53437	0.216231	-7.09597	0.345231	1.28e-12	1.45e-11	23229	protein_coding	HGNC Symbol	38	Cdc42 guanine nucleotide exchange factor 9 [Source:HGNC Symbol;Acc:HGNC:14561]	10.8247	10.0838	8.55041	3.13213	3.30908	3.14775	2.49194	1.72739	1.47662
ENSG00000111261	MANSC1	2656.6	-1.53319	0.25757	-5.95253	0.345512	2.64e-09	1.94e-08	54682	protein_coding	HGNC Symbol	4	MANSC domain containing 1 [Source:HGNC Symbol;Acc:HGNC:25505]	128.052	89.8537	89.2222	43.0396	47.6772	28.5751	31.9601	12.8237	16.141
ENSG00000072864	NDE1	997.935	-1.53313	0.162678	-9.42431	0.345528	4.33e-21	1.24e-19	54820	protein_coding	HGNC Symbol	12	nudE neurodevelopment protein 1 [Source:HGNC Symbol;Acc:HGNC:17619]	42.7915	37.7323	34.5126	21.3172	17.1278	12.4275	9.21622	7.20234	5.83012
ENSG00000108852	MPP2	62.728	-1.52844	0.354908	-4.30659	0.346652	1.66e-05	6.71e-05	4355	protein_coding	HGNC Symbol	21	membrane palmitoylated protein 2 [Source:HGNC Symbol;Acc:HGNC:7220]	2.69081	2.12807	2.42262	0.373986	0.767706	0.367919	0.632874	0.468445	0.305508
ENSG00000065802	ASB1	492.347	-1.52667	0.200643	-7.60888	0.347078	2.76e-14	3.89e-13	51665	protein_coding	HGNC Symbol	9	ankyrin repeat and SOCS box containing 1 [Source:HGNC Symbol;Acc:HGNC:16011]	17.4979	17.974	21.091	5.56304	6.41961	6.45903	4.84544	2.78139	3.41151
ENSG00000096654	ZNF184	176.72	-1.52664	0.320098	-4.76931	0.347084	1.85e-06	8.87e-06	7738	protein_coding	HGNC Symbol	2	zinc finger protein 184 [Source:HGNC Symbol;Acc:HGNC:12975]	9.30251	6.22052	4.97478	6.01494	4.57976	3.20907	1.97773	1.11256	0.916525
ENSG00000154118	JPH3	100.411	-1.52477	0.33399	-4.56531	0.347535	4.99e-06	2.21e-05	57338	protein_coding	HGNC Symbol	4	junctophilin 3 [Source:HGNC Symbol;Acc:HGNC:14203]	5.07409	3.74868	2.78536	0.997296	1.82661	0.531439	0.909756	0.614834	0.712853
ENSG00000175322	ZNF519	25.2182	-1.52103	0.554412	-2.7435	0.348437	0.00607881	0.0141874	162655	protein_coding	HGNC Symbol	13	zinc finger protein 519 [Source:HGNC Symbol;Acc:HGNC:30574]	0.907187	1.01493	0.932772	0.498648	0.264726	0.22484	0.118664	0.234222	0.203672
ENSG00000166946	CCNDBP1	933.592	-1.52001	0.185599	-8.18975	0.348683	2.62e-16	4.56e-15	23582	protein_coding	HGNC Symbol	15	cyclin D1 binding protein 1 [Source:HGNC Symbol;Acc:HGNC:1587]	42.2226	31.1681	34.2016	18.5591	18.7294	12.775	9.55244	5.65062	5.9065
ENSG00000006042	TMEM98	1796.12	-1.51981	0.24336	-6.24509	0.348733	4.24e-10	3.45e-09	26022	protein_coding	HGNC Symbol	9	transmembrane protein 98 [Source:HGNC Symbol;Acc:HGNC:24529]	81.9082	62.9582	62.0941	20.8965	21.0193	15.9227	21.8539	9.54456	10.0818
ENSG00000121957	GPSM2	348.794	-1.51685	0.208522	-7.2743	0.349448	3.48e-13	4.16e-12	29899	protein_coding	HGNC Symbol	12	G protein signaling modulator 2 [Source:HGNC Symbol;Acc:HGNC:29501]	13.3003	13.9143	12.6701	4.48783	4.18267	3.80183	2.55127	2.83995	2.34223
ENSG00000143799	PARP1	4464.05	-1.50953	0.11791	-12.8024	0.351227	1.59e-37	1.7e-35	142	protein_coding	HGNC Symbol	10	poly(ADP-ribose) polymerase 1 [Source:HGNC Symbol;Acc:HGNC:270]	174.241	166.251	170.879	54.2436	61.9856	51.2225	39.0206	32.0299	29.0997
ENSG00000094914	AAAS	1720.6	-1.50684	0.152021	-9.91202	0.351881	3.69e-23	1.26e-21	8086	protein_coding	HGNC Symbol	20	aladin WD repeat nucleoporin [Source:HGNC Symbol;Acc:HGNC:13666]	61.4427	62.6471	72.6525	19.6031	20.331	13.5721	15.7427	11.5647	11.482
ENSG00000119986	AVPI1	138.915	-1.50319	0.320409	-4.69148	0.352772	2.71e-06	1.26e-05	60370	protein_coding	HGNC Symbol	1	arginine vasopressin induced 1 [Source:HGNC Symbol;Acc:HGNC:30898]	6.85772	4.66539	4.43067	4.6125	3.62675	3.22951	1.02842	0.761223	1.29841
ENSG00000164684	ZNF704	584.738	-1.50062	0.183331	-8.18528	0.353402	2.72e-16	4.71e-15	619279	protein_coding	HGNC Symbol	6	zinc finger protein 704 [Source:HGNC Symbol;Acc:HGNC:32291]	20.5885	24.4237	21.674	17.7799	30.3641	18.0894	4.68722	4.18673	4.2262
ENSG00000184497	TMEM255B	2103.14	-1.50051	0.175975	-8.52686	0.353429	1.5e-17	2.94e-16	348013	protein_coding	HGNC Symbol	6	transmembrane protein 255B [Source:HGNC Symbol;Acc:HGNC:28297]	79.9708	80.4247	80.2184	24.9947	25.7843	17.4557	22.7637	12.2381	13.3151
ENSG00000165233	CARD19	1519.29	-1.49997	0.217355	-6.90101	0.353561	5.16e-12	5.37e-11	84270	protein_coding	HGNC Symbol	9	caspase recruitment domain family member 19 [Source:HGNC Symbol;Acc:HGNC:28148]	60.0281	54.2003	59.7492	17.1566	17.6043	14.6963	17.7996	7.99284	9.41984
ENSG00000109805	NCAPG	885.621	-1.49893	0.373775	-4.01023	0.353817	6.07e-05	0.000217173	64151	protein_coding	HGNC Symbol	5	non-SMC condensin I complex subunit G [Source:HGNC Symbol;Acc:HGNC:24304]	28.9992	34.1146	37.7384	3.42821	5.44012	4.90559	3.50058	9.45673	6.05925
ENSG00000085415	SEH1L	705.396	-1.49607	0.175314	-8.53362	0.354519	1.42e-17	2.78e-16	81929	protein_coding	HGNC Symbol	10	SEH1 like nucleoporin [Source:HGNC Symbol;Acc:HGNC:30379]	28.7071	24.6038	27.2836	8.53935	8.11386	6.37727	5.45854	4.86011	5.47369
ENSG00000164323	CFAP97	821.807	-1.49591	0.22721	-6.58383	0.354556	4.58e-11	4.22e-10	57587	protein_coding	HGNC Symbol	6	cilia and flagella associated protein 97 [Source:HGNC Symbol;Acc:HGNC:29276]	42.1304	26.3226	26.0917	13.931	15.4865	10.1995	8.32624	5.27	5.19364
ENSG00000176454	LPCAT4	583.173	-1.49584	0.188113	-7.95179	0.354575	1.84e-15	2.92e-14	254531	protein_coding	HGNC Symbol	10	lysophosphatidylcholine acyltransferase 4 [Source:HGNC Symbol;Acc:HGNC:30059]	24.0328	19.2672	23.3193	23.5767	21.2178	20.44	4.46967	4.42095	4.17528
ENSG00000182551	ADI1	1696.7	-1.49554	0.24096	-6.20658	0.354648	5.41e-10	4.37e-09	55256	protein_coding	HGNC Symbol	3	acireductone dioxygenase 1 [Source:HGNC Symbol;Acc:HGNC:30576]	79.9554	59.0949	55.759	35.5287	39.1795	29.1269	20.3706	9.22251	9.95448
ENSG00000006062	MAP3K14	307.083	-1.49209	0.297515	-5.01519	0.355497	5.3e-07	2.78e-06	9020	protein_coding	HGNC Symbol	7	mitogen-activated protein kinase kinase kinase 14 [Source:HGNC Symbol;Acc:HGNC:6853]	15.2223	10.5421	9.57386	9.16266	8.48447	8.09422	3.73791	1.99089	1.42571
ENSG00000181982	CCDC149	326.964	-1.48889	0.315595	-4.71772	0.356287	2.39e-06	1.12e-05	91050	protein_coding	HGNC Symbol	8	coiled-coil domain containing 149 [Source:HGNC Symbol;Acc:HGNC:25405]	15.5606	11.0005	11.0119	6.18635	6.00928	4.82383	3.89613	1.22967	2.46953
ENSG00000089351	GRAMD1A	4823.42	-1.48887	0.217319	-6.85105	0.356293	7.33e-12	7.5e-11	57655	protein_coding	HGNC Symbol	14	GRAM domain containing 1A [Source:HGNC Symbol;Acc:HGNC:29305]	195.829	176.925	178.418	108.939	114.812	81.9029	57.8684	25.823	29.1761
ENSG00000049239	H6PD	3703.6	-1.48722	0.20953	-7.09792	0.356698	1.27e-12	1.43e-11	9563	protein_coding	HGNC Symbol	3	hexose-6-phosphate dehydrogenase/glucose 1-dehydrogenase [Source:HGNC Symbol;Acc:HGNC:4795]	167.676	128.323	128.075	61.4895	70.1392	47.3185	42.3432	20.5237	23.3459
ENSG00000090376	IRAK3	378.278	-1.48617	0.319679	-4.64894	0.356959	3.34e-06	1.52e-05	11213	protein_coding	HGNC Symbol	3	interleukin 1 receptor associated kinase 3 [Source:HGNC Symbol;Acc:HGNC:17020]	18.7895	13.3577	11.3487	35.7624	31.6348	21.3598	5.00366	1.72739	2.18948
ENSG00000111144	LTA4H	3550.43	-1.48593	0.198145	-7.49922	0.357018	6.42e-14	8.67e-13	4048	protein_coding	HGNC Symbol	10	leukotriene A4 hydrolase [Source:HGNC Symbol;Acc:HGNC:6710]	156.098	129.911	120.172	50.7219	55.3675	35.1159	39.9699	20.1431	22.4294
ENSG00000080503	SMARCA2	1750.74	-1.48585	0.154587	-9.6117	0.357039	7.14e-22	2.14e-20	6595	protein_coding	HGNC Symbol	66	SWI/SNF related, matrix associated, actin dependent regulator of chromatin, subfamily a, member 2 [Source:HGNC Symbol;Acc:HGNC:11098]	75.3734	65.9866	58.8553	58.7626	74.7057	49.2603	17.3051	11.3598	11.4566
ENSG00000165948	IFI27L1	223.223	-1.47925	0.266449	-5.55171	0.358675	2.83e-08	1.81e-07	122509	protein_coding	HGNC Symbol	13	interferon alpha inducible protein 27 like 1 [Source:HGNC Symbol;Acc:HGNC:19754]	9.8868	7.15359	8.56336	5.46955	5.01656	4.55811	2.6106	1.17111	1.40025
ENSG00000158321	AUTS2	292.179	-1.47891	0.36682	-4.03169	0.358761	5.54e-05	0.00020036	26053	protein_coding	HGNC Symbol	29	AUTS2, activator of transcription and developmental regulator [Source:HGNC Symbol;Acc:HGNC:14262]	5.56613	12.6866	14.73	11.2819	14.6791	9.70898	2.82815	1.78595	2.08764
ENSG00000167549	CORO6	65.1859	-1.47823	0.401975	-3.67743	0.358928	0.000235597	0.000751731	84940	protein_coding	HGNC Symbol	12	coronin 6 [Source:HGNC Symbol;Acc:HGNC:21356]	2.21415	1.84979	3.34243	1.83876	1.95897	1.41036	0.613096	0.527	0.356426
ENSG00000137198	GMPR	1265.64	-1.47789	0.214824	-6.87955	0.359014	6e-12	6.2e-11	2766	protein_coding	HGNC Symbol	4	guanosine monophosphate reductase [Source:HGNC Symbol;Acc:HGNC:4376]	57.9677	45.0496	41.7804	20.5692	26.9491	24.2827	14.477	7.40728	7.66317
ENSG00000142046	TMEM91	103.497	-1.47593	0.309076	-4.77529	0.359503	1.79e-06	8.64e-06	641649	protein_coding	HGNC Symbol	14	transmembrane protein 91 [Source:HGNC Symbol;Acc:HGNC:32393]	4.27454	3.38854	4.19747	2.46208	3.0973	1.34904	1.14708	0.497723	0.738312
ENSG00000112029	FBXO5	352.415	-1.47414	0.246774	-5.97365	0.359947	2.32e-09	1.72e-08	26271	protein_coding	HGNC Symbol	3	F-box protein 5 [Source:HGNC Symbol;Acc:HGNC:13584]	14.9609	11.7371	13.3697	3.88011	3.99736	3.20907	2.31394	3.13272	2.46953
ENSG00000167535	CACNB3	1109.18	-1.47312	0.168613	-8.7367	0.360201	2.4e-18	5.15e-17	784	protein_coding	HGNC Symbol	24	calcium voltage-gated channel auxiliary subunit beta 3 [Source:HGNC Symbol;Acc:HGNC:1403]	44.0062	40.9572	41.4047	22.5794	23.8651	16.3928	11.3126	8.08067	6.26292
ENSG00000071282	LMCD1	377.273	-1.4705	0.238578	-6.16359	0.360858	7.11e-10	5.6e-09	29995	protein_coding	HGNC Symbol	7	LIM and cysteine rich domains 1 [Source:HGNC Symbol;Acc:HGNC:6633]	18.2514	12.5229	12.2685	4.86182	3.85177	3.57699	2.7886	2.83995	2.90233
ENSG00000092847	AGO1	2129.1	-1.46525	0.157472	-9.30485	0.362173	1.34e-20	3.75e-19	26523	protein_coding	HGNC Symbol	3	argonaute RISC catalytic component 1 [Source:HGNC Symbol;Acc:HGNC:3262]	80.2783	82.4218	78.9876	23.6858	28.0345	19.6837	16.4745	15.9857	15.8355
ENSG00000142173	COL6A2	345.536	-1.46498	0.295667	-4.95482	0.362241	7.24e-07	3.72e-06	1292	protein_coding	HGNC Symbol	8	collagen type VI alpha 2 chain [Source:HGNC Symbol;Acc:HGNC:2212]	10.1174	15.1912	13.7713	10.1132	10.4699	7.78763	2.84793	1.72739	3.28422
ENSG00000108984	MAP2K6	208.671	-1.46298	0.216066	-6.77098	0.362743	1.28e-11	1.26e-10	5608	protein_coding	HGNC Symbol	9	mitogen-activated protein kinase kinase 6 [Source:HGNC Symbol;Acc:HGNC:6846]	7.67265	7.95571	8.08402	1.55828	3.0973	1.88048	2.05684	1.49317	1.27295
ENSG00000174371	EXO1	211.355	-1.46283	0.382362	-3.82577	0.36278	0.000130363	0.000439571	9156	protein_coding	HGNC Symbol	12	exonuclease 1 [Source:HGNC Symbol;Acc:HGNC:3511]	7.56501	7.15359	9.1593	0.576562	0.847124	1.10376	0.889979	2.22511	1.553
ENSG00000166548	TK2	467.664	-1.45675	0.248708	-5.85728	0.364313	4.71e-09	3.35e-08	7084	protein_coding	HGNC Symbol	21	thymidine kinase 2, mitochondrial [Source:HGNC Symbol;Acc:HGNC:11831]	22.6797	15.3385	15.4037	7.27715	8.03444	5.13043	5.28054	2.48861	3.20784
ENSG00000075142	SRI	2278.34	-1.45665	0.14142	-10.3002	0.364338	7.03e-25	2.92e-23	6717	protein_coding	HGNC Symbol	10	sorcin [Source:HGNC Symbol;Acc:HGNC:11292]	85.7983	82.1763	90.4918	25.6336	26.8829	19.9903	22.4868	16.1028	14.3589
ENSG00000081803	CADPS2	670.109	-1.45373	0.350633	-4.14602	0.365076	3.38e-05	0.000127397	93664	protein_coding	HGNC Symbol	8	calcium dependent secretion activator 2 [Source:HGNC Symbol;Acc:HGNC:16018]	36.3951	20.5113	19.7825	18.7149	19.8148	13.3064	9.59199	3.30839	3.36059
ENSG00000154146	NRGN	1697.32	-1.45291	0.268151	-5.41824	0.365285	6.02e-08	3.68e-07	4900	protein_coding	HGNC Symbol	2	neurogranin [Source:HGNC Symbol;Acc:HGNC:8000]	49.5877	64.3496	77.5366	16.9696	15.5791	11.4668	10.7193	12.9701	14.4353
ENSG00000130413	STK33	34.8321	-1.45274	0.443245	-3.27751	0.365327	0.00104726	0.00291761	65975	protein_coding	HGNC Symbol	17	serine/threonine kinase 33 [Source:HGNC Symbol;Acc:HGNC:14568]	1.27621	1.17862	1.48984	0.0311655	0.211781	0.16352	0.316437	0.234222	0.25459
ENSG00000008311	AASS	593.22	-1.45012	0.217001	-6.68253	0.365992	2.35e-11	2.23e-10	10157	protein_coding	HGNC Symbol	7	aminoadipate-semialdehyde synthase [Source:HGNC Symbol;Acc:HGNC:17366]	28.6763	19.169	19.7825	7.86929	10.364	8.35994	6.24963	3.71828	3.92069
ENSG00000052126	PLEKHA5	358.311	-1.44863	0.274302	-5.28114	0.36637	1.28e-07	7.44e-07	54477	protein_coding	HGNC Symbol	16	pleckstrin homology domain containing A5 [Source:HGNC Symbol;Acc:HGNC:30036]	14.6841	14.1435	11.9317	14.1491	12.7466	9.85206	4.60811	2.19583	1.75667
ENSG00000143811	PYCR2	618.188	-1.44408	0.221576	-6.5173	0.367527	7.16e-11	6.45e-10	29920	protein_coding	HGNC Symbol	9	pyrroline-5-carboxylate reductase 2 [Source:HGNC Symbol;Acc:HGNC:30262]	26.7236	21.3135	22.244	11.4066	10.5758	9.13666	7.23849	3.36695	4.04799
ENSG00000176974	SHMT1	610.431	-1.44329	0.224476	-6.4296	0.367727	1.28e-10	1.12e-09	6470	protein_coding	HGNC Symbol	11	serine hydroxymethyltransferase 1 [Source:HGNC Symbol;Acc:HGNC:10850]	26.5391	21.6245	20.9744	5.92145	6.90935	5.33483	4.13346	4.68445	5.06635
ENSG00000008083	JARID2	521.066	-1.44301	0.16967	-8.50481	0.3678	1.82e-17	3.52e-16	3720	protein_coding	HGNC Symbol	3	jumonji and AT-rich interaction domain containing 2 [Source:HGNC Symbol;Acc:HGNC:6196]	19.5583	20.1839	19.1996	15.2088	16.8233	13.0816	4.92455	4.01106	3.20784
ENSG00000072163	LIMS2	1282.87	-1.44202	0.209281	-6.89038	0.368051	5.56e-12	5.77e-11	55679	protein_coding	HGNC Symbol	18	LIM zinc finger domain containing 2 [Source:HGNC Symbol;Acc:HGNC:16084]	59.5514	41.4483	44.6176	90.5202	58.1206	55.9033	9.35466	9.98373	9.95448
ENSG00000003147	ICA1	655.863	-1.44044	0.374513	-3.84618	0.368454	0.000119975	0.00040751	3382	protein_coding	HGNC Symbol	19	islet cell autoantigen 1 [Source:HGNC Symbol;Acc:HGNC:5343]	32.874	21.5754	20.2878	10.6274	10.6552	6.99047	10.2446	2.75211	3.20784
ENSG00000111885	MAN1A1	739.09	-1.43789	0.224356	-6.40897	0.369107	1.47e-10	1.27e-09	4121	protein_coding	HGNC Symbol	1	mannosidase alpha class 1A member 1 [Source:HGNC Symbol;Acc:HGNC:6821]	32.2282	26.6827	25.0035	38.9725	33.3158	23.4855	8.88001	4.53806	4.2262
ENSG00000100060	MFNG	5912.84	-1.43748	0.121496	-11.8315	0.369212	2.68e-32	1.92e-30	4242	protein_coding	HGNC Symbol	10	MFNG O-fucosylpeptide 3-beta-N-acetylglucosaminyltransferase [Source:HGNC Symbol;Acc:HGNC:7038]	241.312	210.63	217.401	56.8459	67.6508	46.46	56.5038	39.3201	42.3638
ENSG00000137809	ITGA11	145.281	-1.43539	0.441922	-3.24806	0.369747	0.00116194	0.00321539	22801	protein_coding	HGNC Symbol	7	integrin subunit alpha 11 [Source:HGNC Symbol;Acc:HGNC:6136]	2.53705	7.16996	6.58122	3.89569	3.53409	2.71851	1.7404	0.702667	1.01836
ENSG00000122033	MTIF3	499.434	-1.43404	0.280259	-5.11684	0.370093	3.11e-07	1.7e-06	219402	protein_coding	HGNC Symbol	12	mitochondrial translational initiation factor 3 [Source:HGNC Symbol;Acc:HGNC:29788]	25.924	15.4367	15.5332	6.31102	8.35211	4.98735	5.8343	2.57645	3.48789
ENSG00000135976	ANKRD36	123.207	-1.43312	0.324176	-4.42079	0.37033	9.83e-06	4.14e-05	375248	protein_coding	HGNC Symbol	8	ankyrin repeat domain 36 [Source:HGNC Symbol;Acc:HGNC:24079]	3.50574	5.22196	5.1432	1.97901	2.63403	2.20752	1.3053	0.966167	0.636476
ENSG00000157570	TSPAN18	5109.39	-1.43073	0.315516	-4.53457	0.370943	5.77e-06	2.52e-05	90139	protein_coding	HGNC Symbol	13	tetraspanin 18 [Source:HGNC Symbol;Acc:HGNC:20660]	200.765	197.616	178.911	102.238	119.934	51.4678	73.9671	20.5237	31.2382
ENSG00000056972	TRAF3IP2	475.413	-1.43073	0.204231	-7.00547	0.370943	2.46e-12	2.67e-11	10758	protein_coding	HGNC Symbol	16	TRAF3 interacting protein 2 [Source:HGNC Symbol;Acc:HGNC:1343]	19.0202	17.7448	17.0879	10.082	12.045	7.80807	5.32009	2.635	3.30967
ENSG00000120256	LRP11	873.353	-1.43048	0.172275	-8.30349	0.371006	1.01e-16	1.81e-15	84918	protein_coding	HGNC Symbol	3	LDL receptor related protein 11 [Source:HGNC Symbol;Acc:HGNC:16936]	38.2095	30.0549	30.7037	19.4784	17.2734	13.9605	8.99867	5.50423	6.08471
ENSG00000163257	DCAF16	766.057	-1.4302	0.161419	-8.86014	0.37108	7.99e-19	1.86e-17	54876	protein_coding	HGNC Symbol	3	DDB1 and CUL4 associated factor 16 [Source:HGNC Symbol;Acc:HGNC:25987]	31.8899	27.534	27.3095	20.2264	21.6546	13.5517	7.91092	4.97723	5.16818
ENSG00000166002	SMCO4	124.092	-1.4282	0.355429	-4.01823	0.371595	5.86e-05	0.000210944	56935	protein_coding	HGNC Symbol	6	single-pass membrane protein with coiled-coil domains 4 [Source:HGNC Symbol;Acc:HGNC:24810]	4.7512	4.40347	4.94887	1.8076	1.24421	0.817598	1.77996	0.614834	0.611017
ENSG00000176435	CLEC14A	14015.5	-1.42818	0.256023	-5.57833	0.371599	2.43e-08	1.57e-07	161198	protein_coding	HGNC Symbol	1	C-type lectin domain containing 14A [Source:HGNC Symbol;Acc:HGNC:19832]	546.849	526.894	508.671	154.846	175.58	121.781	184.878	67.661	88.572
ENSG00000120784	ZFP30	159.44	-1.42501	0.271062	-5.25714	0.372417	1.46e-07	8.43e-07	22835	protein_coding	HGNC Symbol	11	ZFP30 zinc finger protein [Source:HGNC Symbol;Acc:HGNC:29555]	6.76546	6.286	4.91001	4.70599	5.89016	3.96535	1.26575	1.43461	1.01836
ENSG00000083123	BCKDHB	310.862	-1.42314	0.208985	-6.80976	0.372901	9.78e-12	9.77e-11	594	protein_coding	HGNC Symbol	6	branched chain keto acid dehydrogenase E1 subunit beta [Source:HGNC Symbol;Acc:HGNC:987]	13.454	11.0169	10.7528	3.73986	4.22238	2.96379	3.34236	1.90306	2.1131
ENSG00000183060	LYSMD4	138.734	-1.42274	0.279312	-5.09373	0.373004	3.51e-07	1.9e-06	145748	protein_coding	HGNC Symbol	11	LysM domain containing 4 [Source:HGNC Symbol;Acc:HGNC:26571]	5.05872	4.89456	5.75209	1.40245	2.31635	1.30816	1.64152	0.819778	0.840148
ENSG00000165568	AKR1E2	51.0772	-1.42174	0.439439	-3.23535	0.373262	0.00121493	0.00334727	83592	protein_coding	HGNC Symbol	13	aldo-keto reductase family 1 member E2 [Source:HGNC Symbol;Acc:HGNC:23437]	2.38329	1.60424	1.85259	1.10638	1.12509	0.838038	0.711983	0.234222	0.280049
ENSG00000109084	TMEM97	562.098	-1.4148	0.25485	-5.55148	0.375063	2.83e-08	1.81e-07	27346	protein_coding	HGNC Symbol	5	transmembrane protein 97 [Source:HGNC Symbol;Acc:HGNC:28106]	21.3112	20.0694	21.7517	23.6702	27.2668	19.2544	3.55991	5.41639	3.94615
ENSG00000080819	CPOX	466.478	-1.41447	0.200622	-7.05043	0.375146	1.78e-12	1.97e-11	1371	protein_coding	HGNC Symbol	5	coproporphyrinogen oxidase [Source:HGNC Symbol;Acc:HGNC:2321]	15.5606	17.0573	19.7955	11.0482	13.5672	11.0785	4.48945	2.95706	3.56426
ENSG00000119686	FLVCR2	81.5333	-1.41441	0.330014	-4.28591	0.375163	1.82e-05	7.3e-05	55640	protein_coding	HGNC Symbol	13	feline leukemia virus subgroup C cellular receptor family member 2 [Source:HGNC Symbol;Acc:HGNC:20105]	3.36735	3.12663	2.75945	4.08268	6.07546	4.06755	0.969088	0.409889	0.560099
ENSG00000070371	CLTCL1	129.779	-1.41241	0.252281	-5.59857	0.375683	2.16e-08	1.41e-07	8218	protein_coding	HGNC Symbol	12	clathrin heavy chain like 1 [Source:HGNC Symbol;Acc:HGNC:2093]	5.01259	5.091	4.53431	2.18159	1.86632	1.81916	1.3053	0.819778	0.941984
ENSG00000136161	RCBTB2	362.977	-1.41184	0.269088	-5.24674	0.375833	1.55e-07	8.88e-07	1102	protein_coding	HGNC Symbol	7	RCC1 and BTB domain containing protein 2 [Source:HGNC Symbol;Acc:HGNC:1914]	18.5281	12.2119	10.4289	5.98378	6.35343	3.86315	4.11368	2.19583	2.39315
ENSG00000135439	AGAP2	902.84	-1.40982	0.183997	-7.66215	0.376359	1.83e-14	2.61e-13	116986	protein_coding	HGNC Symbol	4	ArfGAP with GTPase domain, ankyrin repeat and PH domain 2 [Source:HGNC Symbol;Acc:HGNC:16921]	30.9212	34.4256	35.9117	5.79678	7.74324	6.05023	7.29783	6.41184	7.38312
ENSG00000071794	HLTF	567.7	-1.40803	0.197552	-7.12739	0.376826	1.02e-12	1.17e-11	6596	protein_coding	HGNC Symbol	9	helicase like transcription factor [Source:HGNC Symbol;Acc:HGNC:11099]	25.8471	20.2658	17.8911	14.1959	14.7055	9.07534	4.9641	4.53806	3.86977
ENSG00000086062	B4GALT1	3984.57	-1.40684	0.194799	-7.222	0.377136	5.12e-13	6.03e-12	2683	protein_coding	HGNC Symbol	2	beta-1,4-galactosyltransferase 1 [Source:HGNC Symbol;Acc:HGNC:924]	161.679	144.087	142.818	81.2329	67.6772	48.9741	47.7424	24.4177	24.5425
ENSG00000136098	NEK3	165.407	-1.40604	0.268359	-5.23941	0.377346	1.61e-07	9.19e-07	4752	protein_coding	HGNC Symbol	11	NIMA related kinase 3 [Source:HGNC Symbol;Acc:HGNC:7746]	7.47276	5.43477	5.81687	2.47766	3.36202	2.18708	1.9184	1.08328	0.967443
ENSG00000088280	ASAP3	677.743	-1.40426	0.15691	-8.94944	0.377813	3.57e-19	8.61e-18	55616	protein_coding	HGNC Symbol	12	ArfGAP with SH3 domain, ankyrin repeat and PH domain 3 [Source:HGNC Symbol;Acc:HGNC:14987]	27.5692	25.455	23.2157	32.2563	29.5434	20.7466	6.48696	5.12361	4.48079
ENSG00000184584	TMEM173	2242.53	-1.40196	0.181975	-7.70414	0.378415	1.32e-14	1.91e-13	340061	protein_coding	HGNC Symbol	23	transmembrane protein 173 [Source:HGNC Symbol;Acc:HGNC:27962]	76.4036	84.6809	90.3623	179.202	137.869	119.696	24.0096	13.2921	16.5229
ENSG00000137764	MAP2K5	964.008	-1.39726	0.185405	-7.53626	0.37965	4.84e-14	6.58e-13	5607	protein_coding	HGNC Symbol	12	mitogen-activated protein kinase kinase 5 [Source:HGNC Symbol;Acc:HGNC:6845]	45.1748	31.7083	31.7661	18.9954	16.2542	9.72942	9.25578	6.64606	7.05215
ENSG00000118762	PKD2	691.493	-1.39157	0.320792	-4.33792	0.38115	1.44e-05	5.88e-05	5311	protein_coding	HGNC Symbol	7	polycystin 2, transient receptor potential cation channel [Source:HGNC Symbol;Acc:HGNC:9009]	28.2304	27.092	22.4124	13.0895	18.5441	9.6681	10.3831	3.63045	3.33513
ENSG00000111554	MDM1	134.088	-1.38984	0.29181	-4.76284	0.381606	1.91e-06	9.12e-06	56890	protein_coding	HGNC Symbol	15	Mdm1 nuclear protein [Source:HGNC Symbol;Acc:HGNC:29917]	6.25805	4.3871	4.5084	2.27508	2.60755	1.533	1.58218	0.819778	0.840148
ENSG00000166845	C18orf54	443.735	-1.38956	0.202678	-6.85602	0.381681	7.08e-12	7.26e-11	162681	protein_coding	HGNC Symbol	7	chromosome 18 open reading frame 54 [Source:HGNC Symbol;Acc:HGNC:13796]	19.6813	16.3698	13.7713	6.21752	4.91067	3.39303	3.95546	3.60117	3.00417
ENSG00000182013	PNMA8A	32.5561	-1.38901	0.507797	-2.73537	0.381826	0.00623106	0.0145056	55228	protein_coding	HGNC Symbol	3	PNMA family member 8A [Source:HGNC Symbol;Acc:HGNC:25578]	1.33772	1.45691	0.893906	0.825886	1.80014	1.16508	0.435101	0.175667	0.178213
ENSG00000173992	CCS	556.518	-1.38656	0.297648	-4.65838	0.382477	3.19e-06	1.46e-05	9973	protein_coding	HGNC Symbol	9	copper chaperone for superoxide dismutase [Source:HGNC Symbol;Acc:HGNC:1613]	27.0311	16.6808	19.0441	9.47431	12.4554	10.9149	7.59448	3.33767	2.87687
ENSG00000158427	TMSB15B	24.6856	-1.38636	0.610369	-2.27135	0.382528	0.0231257	0.0459883	286527	protein_coding	HGNC Symbol	6	thymosin beta 15B [Source:HGNC Symbol;Acc:HGNC:28612]	1.32234	0.703901	0.77731	0.467483	0.489743	0.327039	0.276882	0.0585556	0.25459
ENSG00000143224	PPOX	289.332	-1.38634	0.239683	-5.78405	0.382535	7.29e-09	5.08e-08	5498	protein_coding	HGNC Symbol	27	protoporphyrinogen oxidase [Source:HGNC Symbol;Acc:HGNC:9280]	13.1311	9.51084	9.92365	3.00747	4.22238	3.29083	2.9666	1.581	2.39315
ENSG00000176273	SLC35G1	103.65	-1.38383	0.33457	-4.13615	0.3832	3.53e-05	0.000132756	159371	protein_coding	HGNC Symbol	6	solute carrier family 35 member G1 [Source:HGNC Symbol;Acc:HGNC:26607]	4.3668	3.3558	3.82177	2.22833	1.72072	0.797158	0.652651	1.054	0.738312
ENSG00000088367	EPB41L1	655.008	-1.38246	0.219733	-6.29155	0.383563	3.14e-10	2.6e-09	2036	protein_coding	HGNC Symbol	19	erythrocyte membrane protein band 4.1 like 1 [Source:HGNC Symbol;Acc:HGNC:3378]	27.6769	24.2764	21.6222	15.7853	16.3998	12.5706	7.99003	3.98178	4.07345
ENSG00000086232	EIF2AK1	3240.43	-1.38234	0.122332	-11.2999	0.383596	1.31e-29	7.82e-28	27102	protein_coding	HGNC Symbol	10	eukaryotic translation initiation factor 2 alpha kinase 1 [Source:HGNC Symbol;Acc:HGNC:24921]	126.33	115.44	121.04	58.2016	48.286	36.8328	32.6523	22.8367	22.5567
ENSG00000051180	RAD51	303.676	-1.3775	0.194739	-7.07361	0.384884	1.51e-12	1.68e-11	5888	protein_coding	HGNC Symbol	11	RAD51 recombinase [Source:HGNC Symbol;Acc:HGNC:9817]	10.5172	11.5734	11.7633	2.30625	1.89279	2.28928	2.74905	2.31295	2.21494
ENSG00000088387	DOCK9	5844.39	-1.37651	0.226687	-6.07229	0.38515	1.26e-09	9.68e-09	23348	protein_coding	HGNC Symbol	19	dedicator of cytokinesis 9 [Source:HGNC Symbol;Acc:HGNC:14132]	220.154	226.214	206.803	88.775	104.699	68.8622	76.0042	34.6649	34.5734
ENSG00000118197	DDX59	251.472	-1.3727	0.250993	-5.46909	0.386167	4.52e-08	2.81e-07	83479	protein_coding	HGNC Symbol	8	DEAD-box helicase 59 [Source:HGNC Symbol;Acc:HGNC:25360]	11.778	8.43044	8.0322	5.70329	5.95634	4.86471	2.51172	1.43461	2.1131
ENSG00000119446	RBM18	537.065	-1.37145	0.215946	-6.35089	0.386504	2.14e-10	1.81e-09	92400	protein_coding	HGNC Symbol	3	RNA binding motif protein 18 [Source:HGNC Symbol;Acc:HGNC:28413]	25.9394	17.2701	17.1008	6.91874	7.63735	4.37415	5.47831	3.60117	3.92069
ENSG00000157368	IL34	24.4241	-1.36993	0.582111	-2.35339	0.38691	0.0186034	0.0380926	146433	protein_coding	HGNC Symbol	6	interleukin 34 [Source:HGNC Symbol;Acc:HGNC:28529]	0.691922	1.09678	0.958682	0.919382	0.463271	0.367919	0.355991	0.117111	0.127295
ENSG00000166813	KIF7	436.457	-1.36876	0.231643	-5.90892	0.387224	3.44e-09	2.5e-08	374654	protein_coding	HGNC Symbol	3	kinesin family member 7 [Source:HGNC Symbol;Acc:HGNC:30497]	16.3909	16.1733	16.2199	10.9858	12.8392	11.2011	5.22121	3.27911	2.24039
ENSG00000143632	ACTA1	47.4126	-1.36826	0.590078	-2.31878	0.387358	0.0204071	0.0412386	58	protein_coding	HGNC Symbol	2	actin, alpha 1, skeletal muscle [Source:HGNC Symbol;Acc:HGNC:129]	0.768802	2.24266	2.21533	0.576562	0.516216	0.531439	0.474655	0.527	0.152754
ENSG00000165029	ABCA1	765.808	-1.36755	0.215708	-6.33981	0.387549	2.3e-10	1.94e-09	19	protein_coding	HGNC Symbol	4	ATP binding cassette subfamily A member 1 [Source:HGNC Symbol;Acc:HGNC:29]	27.0465	33.2143	25.1071	22.8443	29.5037	18.0894	7.73293	4.39167	6.41568
ENSG00000070501	POLB	292.217	-1.36694	0.241812	-5.65292	0.387712	1.58e-08	1.06e-07	5423	protein_coding	HGNC Symbol	17	DNA polymerase beta [Source:HGNC Symbol;Acc:HGNC:9174]	11.4705	11.4916	9.76819	5.51629	5.85045	4.70119	3.61925	1.8445	1.73121
ENSG00000073331	ALPK1	128.937	-1.36584	0.380955	-3.58531	0.388008	0.000336674	0.00104108	80216	protein_coding	HGNC Symbol	19	alpha kinase 1 [Source:HGNC Symbol;Acc:HGNC:20917]	6.70396	3.94512	3.91246	3.80219	3.81206	2.33016	1.83929	0.614834	0.763771
ENSG00000181004	BBS12	123.752	-1.36363	0.420722	-3.24116	0.388604	0.00119044	0.00328213	166379	protein_coding	HGNC Symbol	3	Bardet-Biedl syndrome 12 [Source:HGNC Symbol;Acc:HGNC:26648]	4.96646	4.74724	4.18452	3.41262	4.09002	2.86159	1.89862	0.351334	0.865607
ENSG00000156398	SFXN2	198.331	-1.36108	0.213854	-6.36453	0.38929	1.96e-10	1.67e-09	118980	protein_coding	HGNC Symbol	13	sideroflexin 2 [Source:HGNC Symbol;Acc:HGNC:16086]	7.98017	7.25181	6.85328	1.72969	2.77962	2.1462	1.76018	1.55172	1.47662
ENSG00000093009	CDC45	553.212	-1.35416	0.222466	-6.08702	0.391163	1.15e-09	8.88e-09	8318	protein_coding	HGNC Symbol	12	cell division cycle 45 [Source:HGNC Symbol;Acc:HGNC:1739]	19.8505	21.0679	20.4562	5.95261	5.90339	6.56123	3.89613	4.45023	4.81176
ENSG00000121310	ECHDC2	240.418	-1.35122	0.374759	-3.60556	0.391961	0.000311479	0.000968274	55268	protein_coding	HGNC Symbol	26	enoyl-CoA hydratase domain containing 2 [Source:HGNC Symbol;Acc:HGNC:23408]	12.716	7.08811	7.22898	2.11925	3.04435	1.8396	3.63902	1.25895	1.22203
ENSG00000074181	NOTCH3	296.875	-1.35109	0.268046	-5.04051	0.391996	4.64e-07	2.46e-06	4854	protein_coding	HGNC Symbol	6	notch 3 [Source:HGNC Symbol;Acc:HGNC:7883]	8.61058	13.7834	10.416	4.11385	3.81206	2.33016	2.41283	2.51789	2.21494
ENSG00000176371	ZSCAN2	394.466	-1.35061	0.334652	-4.03586	0.392127	5.44e-05	0.000197182	54993	protein_coding	HGNC Symbol	15	zinc finger and SCAN domain containing 2 [Source:HGNC Symbol;Acc:HGNC:20994]	15.4222	14.7492	13.8491	4.6125	6.59168	4.61943	6.11119	1.78595	2.18948
ENSG00000175294	CATSPER1	21.6738	-1.34819	0.583293	-2.31135	0.392783	0.0208136	0.0419078	117144	protein_coding	HGNC Symbol	2	cation channel sperm associated 1 [Source:HGNC Symbol;Acc:HGNC:17116]	0.845682	0.605682	0.932772	1.57386	0.767706	0.919798	0.138441	0.234222	0.152754
ENSG00000166004	CEP295	360.831	-1.34575	0.230251	-5.84469	0.393451	5.08e-09	3.61e-08	85459	protein_coding	HGNC Symbol	7	centrosomal protein 295 [Source:HGNC Symbol;Acc:HGNC:29366]	14.2997	14.1271	11.5949	7.10574	8.49771	5.64143	2.65016	2.86922	3.13146
ENSG00000142188	TMEM50B	547.964	-1.34495	0.182994	-7.34969	0.393667	1.99e-13	2.49e-12	757	protein_coding	HGNC Symbol	10	transmembrane protein 50B [Source:HGNC Symbol;Acc:HGNC:1280]	23.8482	18.9398	18.2797	11.3287	10.5229	5.49835	5.63653	4.24528	3.56426
ENSG00000178935	ZNF552	114.898	-1.33979	0.298262	-4.49199	0.395079	7.06e-06	3.06e-05	79818	protein_coding	HGNC Symbol	4	zinc finger protein 552 [Source:HGNC Symbol;Acc:HGNC:26135]	5.1356	4.07608	3.62745	1.85435	2.25017	1.81916	1.26575	0.614834	0.941984
ENSG00000119772	DNMT3A	1241.31	-1.3387	0.299983	-4.46258	0.395377	8.1e-06	3.47e-05	1788	protein_coding	HGNC Symbol	15	DNA methyltransferase 3 alpha [Source:HGNC Symbol;Acc:HGNC:2978]	61.0121	40.2206	37.3886	20.3355	24.4475	16.7812	17.7996	6.93884	6.97577
ENSG00000143815	LBR	2164.29	-1.33807	0.148174	-9.03036	0.39555	1.71e-19	4.32e-18	3930	protein_coding	HGNC Symbol	9	lamin B receptor [Source:HGNC Symbol;Acc:HGNC:6518]	93.8092	73.9914	72.9505	29.0151	27.055	19.1114	20.9442	15.5465	16.4975
ENSG00000164244	PRRC1	2578.1	-1.33522	0.181411	-7.36018	0.396333	1.84e-13	2.32e-12	133619	protein_coding	HGNC Symbol	6	proline rich coiled-coil 1 [Source:HGNC Symbol;Acc:HGNC:28164]	93.8861	95.6977	96.1921	42.9305	47.5448	32.7653	30.7537	17.7716	16.0137
ENSG00000184254	ALDH1A3	381.968	-1.33285	0.316475	-4.21153	0.396984	2.54e-05	9.86e-05	220	protein_coding	HGNC Symbol	7	aldehyde dehydrogenase 1 family member A3 [Source:HGNC Symbol;Acc:HGNC:409]	16.6369	11.7535	14.1729	4.64366	4.80478	3.29083	5.59698	2.40078	1.78213
ENSG00000178096	BOLA1	158.397	-1.33113	0.310136	-4.2921	0.397456	1.77e-05	7.13e-05	51027	protein_coding	HGNC Symbol	4	bolA family member 1 [Source:HGNC Symbol;Acc:HGNC:24263]	7.71877	4.89456	5.10433	2.69582	2.58108	3.08643	2.03706	0.995445	0.941984
ENSG00000184304	PRKD1	222.386	-1.32935	0.21884	-6.07453	0.397947	1.24e-09	9.56e-09	5587	protein_coding	HGNC Symbol	10	protein kinase D1 [Source:HGNC Symbol;Acc:HGNC:9407]	8.4107	7.84112	8.2913	7.30831	8.88156	5.80495	1.81951	1.93233	1.6803
ENSG00000166669	ATF7IP2	104.431	-1.32871	0.317141	-4.18965	0.398124	2.79e-05	0.000107317	80063	protein_coding	HGNC Symbol	18	activating transcription factor 7 interacting protein 2 [Source:HGNC Symbol;Acc:HGNC:20397]	3.69025	4.12518	3.76995	4.02035	3.60028	2.43236	1.24597	0.878334	0.483722
ENSG00000057704	TMCC3	1790.12	-1.32732	0.280433	-4.73312	0.398507	2.21e-06	1.04e-05	57458	protein_coding	HGNC Symbol	4	transmembrane and coiled-coil domain family 3 [Source:HGNC Symbol;Acc:HGNC:29199]	92.7637	55.1171	51.7818	24.4338	31.1053	20.7466	23.6734	11.3891	10.4637
ENSG00000183765	CHEK2	252.665	-1.32668	0.277195	-4.78607	0.398685	1.7e-06	8.23e-06	11200	protein_coding	HGNC Symbol	28	checkpoint kinase 2 [Source:HGNC Symbol;Acc:HGNC:16627]	7.91866	10.0838	9.97547	6.37335	7.35939	5.92759	3.30281	1.46389	1.60392
ENSG00000087266	SH3BP2	1812.17	-1.32243	0.126488	-10.455	0.39986	1.39e-25	6.31e-24	6452	protein_coding	HGNC Symbol	28	SH3 domain binding protein 2 [Source:HGNC Symbol;Acc:HGNC:10825]	69.1153	64.5133	66.8357	49.5999	66.3801	45.5198	17.76	12.9115	14.0534
