# Supplementary material for: Whole-Transcriptome Sequencing Analyses of Nuclear Antixoxidant-1 in Endothelial Cells: Role in Inflammation and Atherosclerosis
Source: Cells. 2022 Sep 18;11(18):2919. doi: 10.3390/cells11182919 (PMC9496719; doi:10.3390/cells11182919)
Supplement: Supplementary file 1 [file cells-11-02919-s001.zip › Supplementary Table S2 - Up regulated -chipseq_rnaseq_overlap_genes.xlsx]

## Sheet: chipseq_rnaseq_overlap_genes
Supplementary Table S2. Related to Figure 4A. Gene Upregulated Following Nuclear Atox1 Induction
ensembl_gene_id	external_gene_name	baseMean	log2FoldChange	lfcSE	stat	foldchange	pvalue	padj	entrezgene	gene_biotype	external_gene_source	transcript_count	description	sample.ad_null_1	sample.ad_null_2	sample.ad_null_3	sample.ad_atox1_wt_1	sample.ad_atox1_wt_2	sample.ad_atox1_wt_3	sample.ad_atox1_nls_1	sample.ad_atox1_nls_2	sample.ad_atox1_nls_3
ENSG00000182870	GALNT9	18.2907	1.32283	0.589556	2.24377	2.50157	0.0248469	0.0489253	50614	protein_coding	HGNC Symbol	10	polypeptide N-acetylgalactosaminyltransferase 9 [Source:HGNC Symbol;Acc:HGNC:4131]	0.184513	0.327396	0.285014	11.3287	14.5996	11.9983	0.316437	0.351334	0.432804
ENSG00000165650	PDZD8	2066.47	1.32358	0.168104	7.87356	2.50286	3.45e-15	5.3e-14	118987	protein_coding	HGNC Symbol	4	PDZ domain containing 8 [Source:HGNC Symbol;Acc:HGNC:26974]	30.9827	30.7752	29.4989	38.2401	41.284	28.4115	41.3939	41.8673	42.1602
ENSG00000121417	ZNF211	403.126	1.32459	0.257984	5.13438	2.50462	2.83e-07	1.56e-06	10520	protein_coding	HGNC Symbol	12	zinc finger protein 211 [Source:HGNC Symbol;Acc:HGNC:13003]	7.44201	5.30381	5.10433	7.5888	6.72404	4.29239	7.23849	7.61223	9.41984
ENSG00000143382	ADAMTSL4	279.377	1.32528	0.242958	5.45478	2.50582	4.9e-08	3.04e-07	54507	protein_coding	HGNC Symbol	6	ADAMTS like 4 [Source:HGNC Symbol;Acc:HGNC:19706]	3.75175	4.10881	4.40476	4.70599	5.41365	2.96379	5.18165	6.41184	5.29548
ENSG00000174796	THAP6	174.936	1.32598	0.317504	4.17627	2.50704	2.96e-05	0.000112945	152815	protein_coding	HGNC Symbol	13	THAP domain containing 6 [Source:HGNC Symbol;Acc:HGNC:23189]	3.24435	2.35725	2.12465	3.05422	2.28988	1.67608	2.76882	3.48406	4.20074
ENSG00000162972	MAIP1	487.66	1.32957	0.247573	5.37041	2.51328	7.86e-08	4.72e-07	79568	protein_coding	HGNC Symbol	4	matrix AAA peptidase interacting protein 1 [Source:HGNC Symbol;Acc:HGNC:26198]	9.01036	5.89312	6.63304	8.96008	8.00797	7.48103	8.82068	10.8035	9.80173
ENSG00000083223	TUT7	1601.78	1.32965	0.223158	5.95833	2.51342	2.55e-09	1.87e-08	79670	protein_coding	HGNC Symbol	7	terminal uridylyl transferase 7 [Source:HGNC Symbol;Acc:HGNC:25817]	23.3255	23.6871	23.4618	25.3376	26.9094	16.679	27.4707	36.4216	32.3584
ENSG00000112578	BYSL	2208.79	1.33239	0.179653	7.41647	2.5182	1.2e-13	1.56e-12	705	protein_coding	HGNC Symbol	5	bystin like [Source:HGNC Symbol;Acc:HGNC:1157]	29.1991	31.1517	36.5724	19.4629	18.5441	17.4966	46.892	46.7566	41.2945
ENSG00000120705	ETF1	7626.4	1.3337	0.171061	7.79663	2.52048	6.36e-15	9.62e-14	2107	protein_coding	HGNC Symbol	9	eukaryotic translation termination factor 1 [Source:HGNC Symbol;Acc:HGNC:3477]	119.072	106.764	109.717	91.5331	84.0108	64.8764	149.833	161.291	151.889
ENSG00000155275	TRMT44	553.989	1.33381	0.202169	6.5975	2.52067	4.18e-11	3.88e-10	152992	protein_coding	HGNC Symbol	9	tRNA methyltransferase 44 homolog [Source:HGNC Symbol;Acc:HGNC:26653]	8.77972	7.16996	8.38199	6.29543	7.00201	4.88515	10.7391	11.4769	11.4056
ENSG00000154162	CDH12	21.6325	1.3345	0.577594	2.31044	2.52187	0.0208638	0.0419986	1010	protein_coding	HGNC Symbol	8	cadherin 12 [Source:HGNC Symbol;Acc:HGNC:1751]	0.492033	0.294656	0.181372	1.01288	2.13105	0.899358	0.652651	0.380611	0.330967
ENSG00000117505	DR1	3769.35	1.33533	0.193733	6.89262	2.52333	5.48e-12	5.69e-11	1810	protein_coding	HGNC Symbol	3	down-regulator of transcription 1 [Source:HGNC Symbol;Acc:HGNC:3017]	56.5531	53.8402	55.1631	56.7836	47.333	32.6835	69.359	79.9284	78.4902
ENSG00000166200	COPS2	4525.35	1.33785	0.210566	6.35359	2.52774	2.1e-10	1.78e-09	9318	protein_coding	HGNC Symbol	8	COP9 signalosome subunit 2 [Source:HGNC Symbol;Acc:HGNC:30747]	76.8495	62.3034	59.8788	59.8689	63.5078	37.3234	81.6803	100.833	90.736
ENSG00000168003	SLC3A2	6241.19	1.33788	0.165353	8.09105	2.5278	5.92e-16	9.98e-15	6520	protein_coding	HGNC Symbol	23	solute carrier family 3 member 2 [Source:HGNC Symbol;Acc:HGNC:11026]	105.311	83.3222	85.8539	138.562	112.244	107.453	132.369	134.356	114.897
ENSG00000156304	SCAF4	3345.53	1.34014	0.254014	5.27585	2.53176	1.32e-07	7.65e-07	57466	protein_coding	HGNC Symbol	6	SR-related CTD associated factor 4 [Source:HGNC Symbol;Acc:HGNC:19304]	41.1002	51.5157	53.4789	54.602	53.3291	41.8202	54.2887	76.2979	70.0378
ENSG00000178691	SUZ12	2403.98	1.34432	0.192627	6.97886	2.53911	2.98e-12	3.19e-11	23512	protein_coding	HGNC Symbol	4	SUZ12, polycomb repressive complex 2 subunit [Source:HGNC Symbol;Acc:HGNC:17101]	38.2248	34.442	32.5563	35.1859	36.2542	23.8739	45.1516	52.0266	48.5758
ENSG00000176597	B3GNT5	1357.93	1.34695	0.152393	8.83863	2.54373	9.69e-19	2.22e-17	84002	protein_coding	HGNC Symbol	12	UDP-GlcNAc:betaGal beta-1,3-N-acetylglucosaminyltransferase 5 [Source:HGNC Symbol;Acc:HGNC:15684]	19.5891	20.7078	19.0441	20.7406	19.7618	13.2655	37.4582	23.3051	24.4152
ENSG00000175073	VCPIP1	1417.23	1.35187	0.196901	6.86574	2.55243	6.61e-12	6.81e-11	80124	protein_coding	HGNC Symbol	1	valosin containing protein interacting protein 1 [Source:HGNC Symbol;Acc:HGNC:30897]	19.8658	21.5263	20.2489	29.4982	35.1556	22.6884	26.8774	28.4287	30.78
ENSG00000131094	C1QL1	31.8061	1.35347	0.566875	2.3876	2.55526	0.0169588	0.0351901	10882	protein_coding	HGNC Symbol	1	complement C1q like 1 [Source:HGNC Symbol;Acc:HGNC:24182]	0.215265	0.523833	0.621848	3.95802	2.2237	2.41192	0.51421	0.585556	0.814689
ENSG00000090054	SPTLC1	3249.82	1.35398	0.14053	9.63479	2.55617	5.7e-22	1.73e-20	10558	protein_coding	HGNC Symbol	12	serine palmitoyltransferase long chain base subunit 1 [Source:HGNC Symbol;Acc:HGNC:11277]	50.1105	45.4261	45.9779	50.1609	43.9048	31.6206	70.6248	66.3142	62.7311
ENSG00000100084	HIRA	859.097	1.35481	0.188147	7.20083	2.55764	5.98e-13	6.99e-12	7290	protein_coding	HGNC Symbol	4	histone cell cycle regulator [Source:HGNC Symbol;Acc:HGNC:4916]	11.0861	12.8666	13.292	9.50548	9.08011	7.33795	17.76	17.7423	17.083
ENSG00000166106	ADAMTS15	28.3723	1.35577	0.489474	2.76986	2.55934	0.00560811	0.0132164	170689	protein_coding	HGNC Symbol	1	ADAM metallopeptidase with thrombospondin type 1 motif 15 [Source:HGNC Symbol;Acc:HGNC:16305]	0.276769	0.409245	0.531162	10.0041	10.6817	8.11466	0.593319	0.614834	0.53464
ENSG00000277149	TYW1B	63.6776	1.35618	0.46493	2.91694	2.56006	0.0035348	0.00876814	441250	protein_coding	HGNC Symbol	3	tRNA-yW synthesizing protein 1 homolog B [Source:HGNC Symbol;Acc:HGNC:33908]	0.81493	0.949447	0.971637	0.763555	0.979487	0.531439	0.672428	1.581	1.50208
ENSG00000110047	EHD1	18657.8	1.35845	0.166181	8.17451	2.56409	2.97e-16	5.13e-15	10938	protein_coding	HGNC Symbol	13	EH domain containing 1 [Source:HGNC Symbol;Acc:HGNC:3242]	230.472	276.453	300.91	164.273	191.053	171.41	430.473	365.563	356.987
ENSG00000167081	PBX3	1691.6	1.35862	0.14533	9.34852	2.5644	8.89e-21	2.52e-19	5090	protein_coding	HGNC Symbol	12	PBX homeobox 3 [Source:HGNC Symbol;Acc:HGNC:8634]	26.0316	21.9355	25.5087	24.7766	25.652	18.396	38.5262	34.5185	31.4164
ENSG00000162852	CNST	802.131	1.36154	0.168349	8.08762	2.5696	6.08e-16	1.02e-14	163882	protein_coding	HGNC Symbol	4	consortin, connexin sorting protein [Source:HGNC Symbol;Acc:HGNC:26486]	13.6078	11.2133	10.0403	19.6031	18.9014	14.9007	18.3929	16.2492	14.9445
ENSG00000020577	SAMD4A	5066.2	1.36439	0.144601	9.43551	2.57467	3.89e-21	1.12e-19	23034	protein_coding	HGNC Symbol	13	sterile alpha motif domain containing 4A [Source:HGNC Symbol;Acc:HGNC:23023]	83.7072	68.9823	67.2502	41.902	42.6871	29.0656	137.828	90.3513	90.2268
ENSG00000175166	PSMD2	23187.6	1.36679	0.206045	6.63346	2.57897	3.28e-11	3.07e-10	5708	protein_coding	HGNC Symbol	20	proteasome 26S subunit, non-ATPase 2 [Source:HGNC Symbol;Acc:HGNC:9559]	266.236	357.107	375.363	210.024	222.211	214.477	477.127	489.466	454.724
ENSG00000143476	DTL	1388.41	1.36782	0.1968	6.95027	2.5808	3.65e-12	3.86e-11	51514	protein_coding	HGNC Symbol	6	denticleless E3 ubiquitin protein ligase homolog [Source:HGNC Symbol;Acc:HGNC:30288]	23.6637	18.5961	17.8911	6.13961	9.21247	6.21375	27.8069	31.1809	25.9937
ENSG00000158545	ZC3H18	4827.62	1.36952	0.184428	7.42574	2.58384	1.12e-13	1.46e-12	124245	protein_coding	HGNC Symbol	12	zinc finger CCCH-type containing 18 [Source:HGNC Symbol;Acc:HGNC:25091]	69.5458	67.6727	71.1627	53.7449	51.2907	38.7746	92.3798	104.346	97.6863
ENSG00000135740	SLC9A5	157.577	1.3702	0.232635	5.88992	2.58507	3.86e-09	2.77e-08	6553	protein_coding	HGNC Symbol	9	solute carrier family 9 member A5 [Source:HGNC Symbol;Acc:HGNC:11078]	2.5063	2.07896	2.20238	1.10638	1.32363	1.28772	3.30281	3.10345	3.28422
ENSG00000167302	TEPSIN	1127.27	1.37065	0.203099	6.74866	2.58587	1.49e-11	1.45e-10	146705	protein_coding	HGNC Symbol	13	TEPSIN, adaptor related protein complex 4 accessory protein [Source:HGNC Symbol;Acc:HGNC:26458]	18.8818	14.078	15.7794	16.3307	15.2747	11.058	21.6561	24.1542	22.9895
ENSG00000111962	UST	28.9183	1.37666	0.505468	2.72354	2.59667	0.0064586	0.0149928	10090	protein_coding	HGNC Symbol	3	uronyl 2-sulfotransferase [Source:HGNC Symbol;Acc:HGNC:17223]	0.384401	0.261916	0.582982	1.63619	1.66777	0.817598	0.573542	0.644112	0.560099
ENSG00000272391	POM121C	6982.37	1.38135	0.25585	5.39909	2.60513	6.7e-08	4.06e-07	100101267	protein_coding	HGNC Symbol	8	POM121 transmembrane nucleoporin C [Source:HGNC Symbol;Acc:HGNC:34005]	92.7329	101.935	104.574	105.682	103.177	83.2111	107.529	160.179	152.703
ENSG00000081148	IMPG2	19.6551	1.3814	0.611966	2.25732	2.60522	0.0239882	0.0475308	50939	protein_coding	HGNC Symbol	1	interphotoreceptor matrix proteoglycan 2 [Source:HGNC Symbol;Acc:HGNC:18362]	0.276769	0.376505	0.181372	0.327238	0.344144	0.2044	0.276882	0.497723	0.407345
ENSG00000135637	CCDC142	291.88	1.38142	0.232412	5.94384	2.60524	2.78e-09	2.04e-08	84865	protein_coding	HGNC Symbol	9	coiled-coil domain containing 142 [Source:HGNC Symbol;Acc:HGNC:25889]	4.47443	3.92875	4.09383	4.36317	5.16216	3.69963	5.55742	6.88028	5.42277
ENSG00000004961	HCCS	1497.87	1.38171	0.140543	9.83123	2.60576	8.26e-23	2.75e-21	3052	protein_coding	HGNC Symbol	3	holocytochrome c synthase [Source:HGNC Symbol;Acc:HGNC:4837]	21.4803	20.5768	22.1792	23.2495	24.0107	20.0925	34.3136	30.8881	27.7249
ENSG00000163472	TMEM79	220.043	1.38352	0.328161	4.21599	2.60905	2.49e-05	9.7e-05	84283	protein_coding	HGNC Symbol	7	transmembrane protein 79 [Source:HGNC Symbol;Acc:HGNC:28196]	3.62875	2.86471	2.92787	7.91604	7.06819	7.27663	3.02593	5.29928	4.86268
ENSG00000100056	ESS2	1847.88	1.38593	0.176744	7.84146	2.61341	4.45e-15	6.81e-14	8220	protein_coding	HGNC Symbol	4	ess-2 splicing factor homolog [Source:HGNC Symbol;Acc:HGNC:16817]	32.5203	23.2287	23.695	33.7367	25.9829	24.6915	40.8995	36.4216	37.0174
ENSG00000137947	GTF2B	832.587	1.39079	0.166232	8.36654	2.62222	5.93e-17	1.09e-15	2959	protein_coding	HGNC Symbol	7	general transcription factor IIB [Source:HGNC Symbol;Acc:HGNC:4648]	12.1317	11.0496	12.3463	21.3016	17.0881	13.3064	17.8194	17.5374	16.0901
ENSG00000182372	CLN8	1528.66	1.39552	0.16426	8.49577	2.63083	1.97e-17	3.77e-16	2055	protein_coding	HGNC Symbol	14	CLN8, transmembrane ER and ERGIC protein [Source:HGNC Symbol;Acc:HGNC:2079]	18.8664	23.1469	22.9825	25.6336	39.9869	25.9383	39.0404	29.717	27.2412
ENSG00000080371	RAB21	2374.88	1.39785	0.158768	8.80433	2.63508	1.32e-18	2.96e-17	23011	protein_coding	HGNC Symbol	4	RAB21, member RAS oncogene family [Source:HGNC Symbol;Acc:HGNC:18263]	36.8256	33.4271	30.9628	33.3471	32.0451	23.9556	50.1355	48.2205	48.3212
ENSG00000130559	CAMSAP1	3134.97	1.3987	0.17792	7.8614	2.63664	3.8e-15	5.83e-14	157922	protein_coding	HGNC Symbol	10	calmodulin regulated spectrin associated protein 1 [Source:HGNC Symbol;Acc:HGNC:19946]	41.9151	43.3963	47.8823	36.0117	45.1888	34.6049	63.7225	67.661	61.7127
ENSG00000272886	DCP1A	3303.83	1.401	0.226602	6.18262	2.64084	6.3e-10	5e-09	55802	protein_coding	HGNC Symbol	6	decapping mRNA 1A [Source:HGNC Symbol;Acc:HGNC:18714]	51.0331	45.3443	44.216	55.3967	59.4178	44.5182	55.8511	72.6382	72.3291
ENSG00000073008	PVR	11348.2	1.40466	0.162977	8.61877	2.64755	6.77e-18	1.37e-16	5817	protein_coding	HGNC Symbol	6	poliovirus receptor [Source:HGNC Symbol;Acc:HGNC:9705]	144.427	160.129	176.022	117.743	102.701	91.1418	318.454	200.816	201.279
ENSG00000155744	FAM126B	972.878	1.41064	0.209942	6.71917	2.65854	1.83e-11	1.76e-10	285172	protein_coding	HGNC Symbol	11	family with sequence similarity 126 member B [Source:HGNC Symbol;Acc:HGNC:28593]	14.9916	13.9471	12.2297	18.4656	20.8339	13.6743	18.0765	21.0507	20.52
ENSG00000156869	FRRS1	29.9074	1.41292	0.584995	2.41527	2.66276	0.0157234	0.0328926	391059	protein_coding	HGNC Symbol	5	ferric chelate reductase 1 [Source:HGNC Symbol;Acc:HGNC:27622]	0.276769	0.523833	0.440476	0.498648	0.60887	0.531439	0.316437	0.702667	0.763771
ENSG00000064547	LPAR2	73.3012	1.41573	0.391667	3.61461	2.66794	0.000300797	0.000937907	9170	protein_coding	HGNC Symbol	9	lysophosphatidic acid receptor 2 [Source:HGNC Symbol;Acc:HGNC:3168]	0.937939	1.26047	0.867996	0.79472	1.42952	0.449679	1.08775	1.69811	1.65484
ENSG00000162849	KIF26B	38.5381	1.42014	0.509171	2.78913	2.67612	0.00528502	0.0125324	55083	protein_coding	HGNC Symbol	4	kinesin family member 26B [Source:HGNC Symbol;Acc:HGNC:25484]	0.784178	0.229177	0.621848	1.79202	3.08406	1.59432	1.08775	0.731945	0.636476
ENSG00000099814	CEP170B	7375.12	1.42117	0.17696	8.03101	2.67802	9.67e-16	1.58e-14	283638	protein_coding	HGNC Symbol	4	centrosomal protein 170B [Source:HGNC Symbol;Acc:HGNC:20362]	101.42	100.347	108.344	96.5975	110.986	90.733	146.49	159.096	149.572
ENSG00000158315	RHBDL2	42.7904	1.42153	0.447404	3.17727	2.67869	0.00148666	0.00401379	54933	protein_coding	HGNC Symbol	3	rhomboid like 2 [Source:HGNC Symbol;Acc:HGNC:16083]	0.81493	0.409245	0.570027	1.16871	0.847124	0.674519	0.711983	0.93689	0.967443
ENSG00000164180	TMEM161B	352.924	1.42272	0.246274	5.77697	2.68091	7.61e-09	5.29e-08	153396	protein_coding	HGNC Symbol	15	transmembrane protein 161B [Source:HGNC Symbol;Acc:HGNC:28483]	4.70507	4.86182	5.20798	5.25139	4.48711	4.27195	6.21007	8.05139	7.35766
ENSG00000065621	GSTO2	37.2743	1.42725	0.473988	3.01115	2.68934	0.00260257	0.00665885	119391	protein_coding	HGNC Symbol	7	glutathione S-transferase omega 2 [Source:HGNC Symbol;Acc:HGNC:23064]	0.553538	0.523833	0.505251	0.560979	0.370617	0.24528	1.24597	0.351334	0.814689
ENSG00000184402	SS18L1	967.562	1.42799	0.200647	7.11692	2.69071	1.1e-12	1.26e-11	26039	protein_coding	HGNC Symbol	5	SS18L1, nBAF chromatin remodeling complex subunit [Source:HGNC Symbol;Acc:HGNC:15592]	11.9472	14.7164	13.7713	7.79138	9.82134	7.33795	19.4015	20.5823	19.858
ENSG00000157181	ODR4	692.174	1.4289	0.234365	6.09689	2.69241	1.08e-09	8.37e-09	54953	protein_coding	HGNC Symbol	5	odr-4 GPCR localization factor homolog [Source:HGNC Symbol;Acc:HGNC:24299]	12.7467	7.93934	8.45972	15.0997	10.7876	6.31595	13.8441	14.1412	14.8172
ENSG00000155307	SAMSN1	94.3705	1.43058	0.292678	4.88788	2.69554	1.02e-06	5.11e-06	64092	protein_coding	HGNC Symbol	12	SAM domain, SH3 domain and nuclear localization signals 1 [Source:HGNC Symbol;Acc:HGNC:10528]	1.16858	1.35869	1.43802	4.20734	3.52086	2.2484	2.84793	1.55172	1.65484
ENSG00000155307.1	SAMSN1	94.3705	1.43058	0.292678	4.88788	2.69554	1.02e-06	5.11e-06	388813	protein_coding	HGNC Symbol	12	SAM domain, SH3 domain and nuclear localization signals 1 [Source:HGNC Symbol;Acc:HGNC:10528]	1.16858	1.35869	1.43802	4.20734	3.52086	2.2484	2.84793	1.55172	1.65484
ENSG00000176102	CSTF3	1912.01	1.43065	0.21302	6.71601	2.69567	1.87e-11	1.79e-10	1479	protein_coding	HGNC Symbol	8	cleavage stimulation factor subunit 3 [Source:HGNC Symbol;Acc:HGNC:2485]	26.3699	26.8464	26.7654	26.7244	25.9961	17.4557	34.2147	41.633	41.4473
ENSG00000007545	CRAMP1	855.681	1.43464	0.16051	8.93803	2.70315	3.96e-19	9.51e-18	57585	protein_coding	HGNC Symbol	8	cramped chromatin regulator homolog 1 [Source:HGNC Symbol;Acc:HGNC:14122]	12.2701	12.0973	11.3617	11.5468	12.0715	8.78918	18.7884	18.3572	16.2429
ENSG00000080823	MOK	312.075	1.43667	0.237749	6.0428	2.70695	1.51e-09	1.15e-08	5891	protein_coding	HGNC Symbol	40	MOK protein kinase [Source:HGNC Symbol;Acc:HGNC:9833]	5.56613	3.40491	4.09383	3.84894	5.12245	3.96535	6.72428	6.851	5.88104
ENSG00000064313	TAF2	2808.87	1.4371	0.185378	7.75229	2.70777	9.03e-15	1.34e-13	6873	protein_coding	HGNC Symbol	9	TATA-box binding protein associated factor 2 [Source:HGNC Symbol;Acc:HGNC:11536]	43.6065	36.7993	37.0129	27.8931	31.0788	21.462	54.9216	60.2244	58.4794
ENSG00000135926	TMBIM1	12758.8	1.43875	0.16386	8.78037	2.71085	1.63e-18	3.6e-17	64114	protein_coding	HGNC Symbol	23	transmembrane BAX inhibitor motif containing 1 [Source:HGNC Symbol;Acc:HGNC:23410]	160.203	181.033	189.793	271.997	233.647	194.364	276.19	259.196	259.758
ENSG00000108848	LUC7L3	3814.56	1.43947	0.157669	9.1297	2.71221	6.87e-20	1.81e-18	51747	protein_coding	HGNC Symbol	23	LUC7 like 3 pre-mRNA splicing factor [Source:HGNC Symbol;Acc:HGNC:24309]	56.3071	50.1243	52.7016	40.7957	38.1338	21.1349	80.1179	77.0884	79.9668
ENSG00000182472	CAPN12	17.4177	1.44146	0.586191	2.45903	2.71596	0.0139312	0.0295651	147968	protein_coding	HGNC Symbol	12	calpain 12 [Source:HGNC Symbol;Acc:HGNC:13249]	0.184513	0.196437	0.336834	0.4519	0.397089	0.388359	0.415323	0.351334	0.330967
ENSG00000180398	MCFD2	15645.5	1.44377	0.134078	10.7682	2.72032	4.87e-27	2.42e-25	90411	protein_coding	HGNC Symbol	18	multiple coagulation factor deficiency 2 [Source:HGNC Symbol;Acc:HGNC:18451]	214.019	215.803	220.704	308.616	259.352	198.799	353.618	325.042	300.977
ENSG00000116991	SIPA1L2	1126.18	1.44862	0.167563	8.64523	2.72946	5.37e-18	1.1e-16	57568	protein_coding	HGNC Symbol	6	signal induced proliferation associated 1 like 2 [Source:HGNC Symbol;Acc:HGNC:23800]	13.5002	16.5662	16.5567	40.9826	52.0981	38.7337	29.1517	20.6701	21.6147
ENSG00000100079	LGALS2	31.5911	1.45004	0.458678	3.16134	2.73215	0.00157047	0.00421927	3957	protein_coding	HGNC Symbol	2	galectin 2 [Source:HGNC Symbol;Acc:HGNC:6562]	0.430529	0.360135	0.505251	0.467483	0.661815	0.306599	0.573542	0.614834	0.763771
ENSG00000118007	STAG1	2326.37	1.45448	0.148162	9.81683	2.74057	9.53e-23	3.16e-21	10274	protein_coding	HGNC Symbol	10	stromal antigen 1 [Source:HGNC Symbol;Acc:HGNC:11354]	36.0722	30.5133	29.8357	18.933	20.503	16.8834	54.2689	49.9479	42.1602
ENSG00000174939	ASPHD1	65.7476	1.46028	0.489148	2.98535	2.75162	0.0028325	0.00718447	253982	protein_coding	HGNC Symbol	6	aspartate beta-hydroxylase domain containing 1 [Source:HGNC Symbol;Acc:HGNC:27380]	0.492033	1.06404	1.11414	0.732389	1.12509	0.776719	0.850424	1.581	1.553
ENSG00000130702	LAMA5	15577.6	1.46124	0.278326	5.25011	2.75345	1.52e-07	8.74e-07	3911	protein_coding	HGNC Symbol	14	laminin subunit alpha 5 [Source:HGNC Symbol;Acc:HGNC:6485]	143.212	248.641	246.342	503.728	842.372	629.755	281.016	335.436	344.512
ENSG00000061936	SFSWAP	3484.16	1.46232	0.199493	7.33018	2.75551	2.3e-13	2.85e-12	6433	protein_coding	HGNC Symbol	11	splicing factor SWAP [Source:HGNC Symbol;Acc:HGNC:10790]	48.2039	47.8325	47.4807	43.9745	40.6884	34.4822	64.7509	77.2934	73.4493
ENSG00000167378	IRGQ	2266.37	1.46306	0.235226	6.21982	2.75693	4.98e-10	4.03e-09	126298	protein_coding	HGNC Symbol	5	immunity related GTPase Q [Source:HGNC Symbol;Acc:HGNC:24868]	29.9833	34.7858	28.5661	28.1425	29.6493	22.1569	77.1908	37.0657	34.3188
ENSG00000165732	DDX21	9241.61	1.47091	0.165348	8.89583	2.77197	5.8e-19	1.36e-17	9188	protein_coding	HGNC Symbol	2	DExD-box helicase 21 [Source:HGNC Symbol;Acc:HGNC:2744]	123.085	127.095	128.697	100.867	94.2557	69.1688	190.95	197.127	188.906
ENSG00000183793	NPIPA5	23.7549	1.47253	0.599522	2.45617	2.77508	0.0140426	0.0297708	100288332	protein_coding	HGNC Symbol	3	nuclear pore complex interacting protein family member A5 [Source:HGNC Symbol;Acc:HGNC:41980]	0.430529	0.343765	0.194327	0.327238	0.25149	0.16352	0.29666	0.585556	0.560099
ENSG00000117500	TMED5	3115.46	1.47547	0.16299	9.05247	2.78073	1.4e-19	3.54e-18	50999	protein_coding	HGNC Symbol	5	transmembrane p24 trafficking protein 5 [Source:HGNC Symbol;Acc:HGNC:24251]	51.8173	38.6982	37.4922	100.789	92.8262	50.4458	74.3429	64.3819	58.3521
ENSG00000164509	IL31RA	30.5954	1.47828	0.519796	2.84397	2.78617	0.00445556	0.0107914	133396	protein_coding	HGNC Symbol	14	interleukin 31 receptor A [Source:HGNC Symbol;Acc:HGNC:18969]	0.461281	0.327396	0.466386	2.74256	1.9325	1.45124	0.949311	0.761223	0.280049
ENSG00000275052	PPP4R3B	5214.11	1.48166	0.180977	8.187	2.7927	2.68e-16	4.65e-15	57223	protein_coding	HGNC Symbol	6	protein phosphatase 4 regulatory subunit 3B [Source:HGNC Symbol;Acc:HGNC:29267]	74.2817	71.1431	67.4316	58.186	60.4767	42.9035	102.427	112.075	110.339
ENSG00000163219	ARHGAP25	96.9452	1.48274	0.491081	3.01934	2.79479	0.00253323	0.00650169	9938	protein_coding	HGNC Symbol	17	Rho GTPase activating protein 25 [Source:HGNC Symbol;Acc:HGNC:28951]	1.52223	1.2441	1.23074	3.56845	2.68697	1.61476	4.58833	0.907612	1.17112
ENSG00000064651	SLC12A2	3158.75	1.48907	0.370913	4.0146	2.80708	5.95e-05	0.000213775	6558	protein_coding	HGNC Symbol	8	solute carrier family 12 member 2 [Source:HGNC Symbol;Acc:HGNC:10911]	32.4435	49.273	46.1333	42.1669	54.7189	36.1583	136.879	37.7098	40.378
ENSG00000120458	MSANTD2	617.836	1.48953	0.240392	6.19625	2.80798	5.78e-10	4.61e-09	79684	protein_coding	HGNC Symbol	8	Myb/SANT DNA binding domain containing 2 [Source:HGNC Symbol;Acc:HGNC:26266]	9.241	8.36496	7.50104	11.5624	9.31836	5.82539	10.7984	14.4925	12.9586
ENSG00000136603	SKIL	4768.43	1.48999	0.22831	6.52617	2.80887	6.75e-11	6.09e-10	6498	protein_coding	HGNC Symbol	10	SKI like proto-oncogene [Source:HGNC Symbol;Acc:HGNC:10897]	64.7024	67.4926	61.4722	72.2728	75.8043	46.828	81.5023	108.416	104.662
ENSG00000179119	SPTY2D1	1732.43	1.49154	0.191609	7.78432	2.8119	7.01e-15	1.06e-13	144108	protein_coding	HGNC Symbol	3	SPT2 chromatin protein domain containing 1 [Source:HGNC Symbol;Acc:HGNC:26818]	26.0931	21.1334	23.1897	25.7739	25.4005	17.5988	34.7487	39.9349	33.6568
ENSG00000267041	ZNF850	193.913	1.49365	0.288408	5.17894	2.816	2.23e-07	1.25e-06	342892	protein_coding	HGNC Symbol	3	zinc finger protein 850 [Source:HGNC Symbol;Acc:HGNC:27994]	2.70618	3.3558	1.81372	2.38416	2.46195	1.75784	4.58833	3.33767	4.35349
ENSG00000130254	SAFB2	5002.92	1.4949	0.208004	7.18689	2.81844	6.63e-13	7.71e-12	9667	protein_coding	HGNC Symbol	11	scaffold attachment factor B2 [Source:HGNC Symbol;Acc:HGNC:21605]	65.3174	66.9851	70.2558	52.6697	57.5382	46.3987	91.6678	108.299	110.798
ENSG00000013441	CLK1	1876.76	1.50593	0.268816	5.60208	2.84007	2.12e-08	1.39e-07	1195	protein_coding	HGNC Symbol	15	CDC like kinase 1 [Source:HGNC Symbol;Acc:HGNC:2068]	37.1639	20.0857	19.0182	36.1364	26.3667	15.6161	38.3877	41.9551	37.4502
ENSG00000163959	SLC51A	127.586	1.5076	0.277649	5.42986	2.84336	5.64e-08	3.46e-07	200931	protein_coding	HGNC Symbol	14	solute carrier family 51 alpha subunit [Source:HGNC Symbol;Acc:HGNC:29955]	1.56836	2.02985	1.51575	1.41803	1.09861	0.960678	2.74905	2.98634	2.31677
ENSG00000175376	EIF1AD	1312.86	1.50799	0.133254	11.3167	2.84414	1.08e-29	6.55e-28	84285	protein_coding	HGNC Symbol	11	eukaryotic translation initiation factor 1A domain containing [Source:HGNC Symbol;Acc:HGNC:28147]	19.6506	16.5826	16.7122	48.1351	44.9902	35.6677	32.3754	25.8523	25.5099
ENSG00000143479	DYRK3	532.216	1.50871	0.203507	7.41355	2.84555	1.23e-13	1.59e-12	8444	protein_coding	HGNC Symbol	6	dual specificity tyrosine phosphorylation regulated kinase 3 [Source:HGNC Symbol;Acc:HGNC:3094]	7.79565	6.53154	7.07352	5.12673	5.61219	4.61943	10.6006	12.0039	10.7692
ENSG00000179588	ZFPM1	1273.9	1.51296	0.298059	5.07605	2.85396	3.85e-07	2.07e-06	161882	protein_coding	HGNC Symbol	5	zinc finger protein, FOG family member 1 [Source:HGNC Symbol;Acc:HGNC:19762]	14.4381	17.2046	19.3161	17.4839	18.4514	15.4526	18.3929	30.9759	28.8451
ENSG00000137409	MTCH1	17182.2	1.51647	0.119184	12.7237	2.86089	4.36e-37	4.54e-35	23787	protein_coding	HGNC Symbol	6	mitochondrial carrier 1 [Source:HGNC Symbol;Acc:HGNC:17586]	226.505	224.561	237.377	254.56	245.256	212.678	415.482	340.296	339.573
ENSG00000117597	UTP25	1250.87	1.51906	0.152098	9.98742	2.86605	1.73e-23	6.26e-22	27042	protein_coding	HGNC Symbol	2	UTP25, small subunit processor component [Source:HGNC Symbol;Acc:HGNC:28440]	17.1443	16.8118	16.168	17.0631	15.1423	11.2624	35.0454	24.8861	21.0037
ENSG00000155330	C16orf87	503.745	1.51941	0.260965	5.82229	2.86674	5.8e-09	4.1e-08	388272	protein_coding	HGNC Symbol	4	chromosome 16 open reading frame 87 [Source:HGNC Symbol;Acc:HGNC:33754]	7.50351	6.1223	6.5294	10.6742	9.11982	6.99047	8.88001	13.2628	9.24163
ENSG00000183955	KMT5A	3265.88	1.53107	0.158074	9.68577	2.88999	3.47e-22	1.07e-20	387893	protein_coding	HGNC Symbol	9	lysine methyltransferase 5A [Source:HGNC Symbol;Acc:HGNC:29489]	44.4675	41.9721	43.4775	57.3134	53.3291	48.177	69.7941	71.1451	65.6079
ENSG00000120889	TNFRSF10B	18723.6	1.53266	0.16792	9.12731	2.89319	7.02e-20	1.85e-18	8795	protein_coding	HGNC Symbol	8	TNF receptor superfamily member 10b [Source:HGNC Symbol;Acc:HGNC:11905]	207.346	264.11	270.452	264.33	305.97	237.206	464.727	363.162	371.676
ENSG00000156232	WHAMM	987.881	1.53277	0.175597	8.72891	2.89341	2.57e-18	5.47e-17	123720	protein_coding	HGNC Symbol	2	WAS protein homolog associated with actin, golgi membranes and microtubules [Source:HGNC Symbol;Acc:HGNC:30493]	16.0526	11.6062	11.7503	13.3544	12.3892	10.4448	24.0492	20.9043	18.2541
ENSG00000180530	NRIP1	1810.89	1.53443	0.128167	11.9721	2.89674	4.97e-33	3.68e-31	8204	protein_coding	HGNC Symbol	7	nuclear receptor interacting protein 1 [Source:HGNC Symbol;Acc:HGNC:8001]	23.264	23.6543	24.9516	32.4277	39.0339	27.7575	46.5558	35.3969	34.497
ENSG00000111641	NOP2	2106.17	1.53687	0.166521	9.22927	2.90164	2.72e-20	7.46e-19	4839	protein_coding	HGNC Symbol	23	NOP2 nucleolar protein [Source:HGNC Symbol;Acc:HGNC:7867]	25.1552	27.4685	30.7167	22.7041	23.918	22.627	47.8017	44.6486	41.5491
ENSG00000130558	OLFM1	31.7403	1.53905	0.50486	3.04846	2.90602	0.00230014	0.00597064	10439	protein_coding	HGNC Symbol	12	olfactomedin 1 [Source:HGNC Symbol;Acc:HGNC:17187]	0.492033	0.376505	0.3757	0.17141	0.0926541	0.14308	0.474655	0.93689	0.560099
ENSG00000166068	SPRED1	1355.73	1.54395	0.296307	5.21064	2.91591	1.88e-07	1.07e-06	161742	protein_coding	HGNC Symbol	3	sprouty related EVH1 domain containing 1 [Source:HGNC Symbol;Acc:HGNC:20249]	15.13	19.6437	18.6036	31.9914	34.0041	21.1554	19.6586	32.1177	31.9002
ENSG00000135407	AVIL	88.9162	1.5466	0.423457	3.65232	2.92129	0.000259878	0.000820283	10677	protein_coding	HGNC Symbol	10	advillin [Source:HGNC Symbol;Acc:HGNC:14188]	1.38384	1.17862	0.932772	1.60502	1.25745	0.838038	1.18664	2.69356	1.60392
ENSG00000176624	MEX3C	3602.83	1.54824	0.178049	8.69556	2.9246	3.45e-18	7.29e-17	51320	protein_coding	HGNC Symbol	4	mex-3 RNA binding family member C [Source:HGNC Symbol;Acc:HGNC:28040]	47.1891	47.587	47.2086	41.0138	40.9134	29.4335	72.6223	78.4645	76.3262
ENSG00000156860	FBRS	9719.63	1.55099	0.227088	6.82991	2.93019	8.5e-12	8.62e-11	64319	protein_coding	HGNC Symbol	9	fibrosin [Source:HGNC Symbol;Acc:HGNC:20442]	135.14	121.185	126.727	159.941	137.697	101.484	166.901	221.194	218.642
ENSG00000163811	WDR43	3427.37	1.55134	0.174044	8.91347	2.93089	4.95e-19	1.17e-17	23160	protein_coding	HGNC Symbol	6	WD repeat domain 43 [Source:HGNC Symbol;Acc:HGNC:28945]	43.8679	45.2297	45.7058	27.1919	31.0524	24.0783	70.6445	71.2914	74.8496
ENSG00000135709	KIAA0513	473.378	1.55313	0.336752	4.61209	2.93454	3.99e-06	1.79e-05	9764	protein_coding	HGNC Symbol	7	KIAA0513 [Source:HGNC Symbol;Acc:HGNC:29058]	6.38106	5.50025	6.71077	8.25886	7.95502	8.3395	6.17052	9.98373	12.9332
ENSG00000121931	LRIF1	1583.99	1.55355	0.156157	9.94866	2.93539	2.56e-23	8.9e-22	55791	protein_coding	HGNC Symbol	3	ligand dependent nuclear receptor interacting factor 1 [Source:HGNC Symbol;Acc:HGNC:30299]	23.4638	19.6601	19.2643	31.9135	25.7181	17.006	35.6189	33.7866	31.5692
ENSG00000087087	SRRT	7631.35	1.55366	0.155469	9.99338	2.93561	1.63e-23	5.95e-22	51593	protein_coding	HGNC Symbol	19	serrate, RNA effector molecule [Source:HGNC Symbol;Acc:HGNC:24101]	93.84	98.497	107.321	113.598	104.276	90.2629	171.39	164.571	150.412
ENSG00000118946	PCDH17	456.653	1.55549	0.195305	7.96441	2.93933	1.66e-15	2.66e-14	27253	protein_coding	HGNC Symbol	4	protocadherin 17 [Source:HGNC Symbol;Acc:HGNC:14267]	6.33493	6.62976	4.98774	29.4202	47.611	27.5939	10.6204	8.63695	9.92902
ENSG00000176105	YES1	8350.27	1.55751	0.207976	7.48893	2.94346	6.94e-14	9.35e-13	7525	protein_coding	HGNC Symbol	5	YES proto-oncogene 1, Src family tyrosine kinase [Source:HGNC Symbol;Acc:HGNC:12841]	107.663	113.688	106.155	124.693	129.689	79.5114	153.848	189.486	181.039
ENSG00000176927	EFCAB5	46.7061	1.55821	0.408147	3.81777	2.94489	0.000134663	0.000451794	374786	protein_coding	HGNC Symbol	13	EF-hand calcium binding domain 5 [Source:HGNC Symbol;Acc:HGNC:24801]	0.568914	0.73664	0.544117	2.01018	1.56188	1.24684	1.52285	0.614834	0.941984
ENSG00000143178	TBX19	95.6619	1.55924	0.328701	4.74365	2.94699	2.1e-06	9.93e-06	9095	protein_coding	HGNC Symbol	4	T-box 19 [Source:HGNC Symbol;Acc:HGNC:11596]	1.19933	1.17862	1.34734	1.24662	1.50894	0.797158	1.72063	1.81522	2.46953
ENSG00000110218	PANX1	913.885	1.56194	0.162893	9.58875	2.9525	8.92e-22	2.65e-20	24145	protein_coding	HGNC Symbol	2	pannexin 1 [Source:HGNC Symbol;Acc:HGNC:8599]	11.7934	11.819	12.1908	20.7406	18.3323	15.9636	26.3236	17.9766	15.4027
ENSG00000060138	YBX3	41152.8	1.56631	0.146172	10.7155	2.96147	8.61e-27	4.23e-25	8531	protein_coding	HGNC Symbol	18	Y-box binding protein 3 [Source:HGNC Symbol;Acc:HGNC:2428]	481.824	542.396	580.275	426.967	430.802	375.032	1082.47	764.648	818.101
ENSG00000182831	C16orf72	5101.67	1.57031	0.207231	7.5776	2.96969	3.52e-14	4.89e-13	29035	protein_coding	HGNC Symbol	2	chromosome 16 open reading frame 72 [Source:HGNC Symbol;Acc:HGNC:30103]	64.3026	69.0314	65.3588	51.9685	53.7394	41.7384	95.0497	116.818	109.448
ENSG00000137221	TJAP1	2190.11	1.57102	0.259555	6.05275	2.97115	1.42e-09	1.09e-08	93643	protein_coding	HGNC Symbol	15	tight junction associated protein 1 [Source:HGNC Symbol;Acc:HGNC:17949]	30.9827	26.0771	28.3718	25.3687	22.9518	18.1507	34.6696	53.9297	47.9139
ENSG00000157764	BRAF	1663.74	1.57112	0.249505	6.29695	2.97135	3.04e-10	2.52e-09	673	protein_coding	HGNC Symbol	21	B-Raf proto-oncogene, serine/threonine kinase [Source:HGNC Symbol;Acc:HGNC:1097]	21.588	22.3939	20.793	18.4344	21.787	16.2702	27.2136	38.8516	37.8321
ENSG00000110713	NUP98	8290.28	1.57136	0.199544	7.87474	2.97184	3.41e-15	5.27e-14	4928	protein_coding	HGNC Symbol	21	nucleoporin 98 [Source:HGNC Symbol;Acc:HGNC:8068]	102.589	107.5	112.554	116.964	137.419	112.992	158.812	189.515	174.954
ENSG00000173825	TIGD3	25.3214	1.57177	0.55948	2.80934	2.97269	0.00496432	0.0118558	220359	protein_coding	HGNC Symbol	1	tigger transposable element derived 3 [Source:HGNC Symbol;Acc:HGNC:18334]	0.338273	0.376505	0.259103	0.358403	0.489743	0.347479	0.355991	0.761223	0.458263
ENSG00000112031	MTRF1L	1438.73	1.57331	0.184863	8.51068	2.97587	1.73e-17	3.37e-16	54516	protein_coding	HGNC Symbol	11	mitochondrial translational release factor 1 like [Source:HGNC Symbol;Acc:HGNC:21051]	21.9109	17.9904	16.2328	24.3403	20.1324	14.2875	31.1097	32.5569	28.0559
ENSG00000117625	RCOR3	1685.77	1.57966	0.239931	6.58384	2.989	4.58e-11	4.22e-10	55758	protein_coding	HGNC Symbol	16	REST corepressor 3 [Source:HGNC Symbol;Acc:HGNC:25594]	26.4468	18.4324	20.7283	19.8368	20.0662	14.6759	29.9626	38.3246	37.7048
ENSG00000111647	UHRF1BP1L	1289.84	1.58109	0.268667	5.88494	2.99196	3.98e-09	2.85e-08	23074	protein_coding	HGNC Symbol	10	UHRF1 binding protein 1 like [Source:HGNC Symbol;Acc:HGNC:29102]	19.0509	15.1748	15.8571	14.5543	14.6394	11.4668	20.252	32.1177	28.1322
ENSG00000073921	PICALM	13972.9	1.5821	0.173672	9.1097	2.99405	8.26e-20	2.16e-18	8301	protein_coding	HGNC Symbol	24	phosphatidylinositol binding clathrin assembly protein [Source:HGNC Symbol;Acc:HGNC:15514]	165.954	185.977	188.549	195.86	198.558	157.163	294.741	301.62	293.517
ENSG00000143190	POU2F1	1752.14	1.5858	0.238688	6.6438	3.00173	3.06e-11	2.87e-10	5451	protein_coding	HGNC Symbol	17	POU class 2 homeobox 1 [Source:HGNC Symbol;Acc:HGNC:9212]	20.9883	24.4073	22.2181	18.2474	21.6149	13.7561	30.3779	40.8425	38.8759
ENSG00000164620	RELL2	119.94	1.58622	0.312394	5.07762	3.00261	3.82e-07	2.06e-06	285613	protein_coding	HGNC Symbol	7	RELT like 2 [Source:HGNC Symbol;Acc:HGNC:26902]	1.35309	1.81705	1.43802	0.701224	1.4957	1.022	2.21506	2.43006	2.92779
ENSG00000165699	TSC1	2301.16	1.58751	0.230603	6.8842	3.00531	5.81e-12	6.01e-11	7248	protein_coding	HGNC Symbol	47	TSC complex subunit 1 [Source:HGNC Symbol;Acc:HGNC:12362]	32.6741	28.2051	28.1386	27.3322	32.5878	23.4855	40.5435	56.4183	47.863
ENSG00000182903	ZNF721	1114.88	1.58787	0.182099	8.71984	3.00606	2.79e-18	5.91e-17	170960	protein_coding	HGNC Symbol	6	zinc finger protein 721 [Source:HGNC Symbol;Acc:HGNC:29425]	16.1295	14.3072	12.6831	16.7515	16.9689	10.5061	24.0492	25.4424	21.742
ENSG00000095564	BTAF1	1694.99	1.59058	0.21246	7.48648	3.0117	7.07e-14	9.49e-13	9044	protein_coding	HGNC Symbol	4	B-TFIID TATA-box binding protein associated factor 1 [Source:HGNC Symbol;Acc:HGNC:17307]	19.8351	23.2615	22.1274	23.7014	29.4508	20.0312	32.415	36.5094	38.3668
ENSG00000075407	ZNF37A	1682.35	1.59375	0.189667	8.4029	3.01834	4.36e-17	8.11e-16	7587	protein_coding	HGNC Symbol	6	zinc finger protein 37A [Source:HGNC Symbol;Acc:HGNC:13102]	21.2651	23.1796	20.2748	27.8464	27.9021	17.374	34.017	36.2166	36.7628
ENSG00000100031	GGT1	74.7714	1.59451	0.378967	4.20752	3.01992	2.58e-05	0.000100119	2678	protein_coding	HGNC Symbol	26	gamma-glutamyltransferase 1 [Source:HGNC Symbol;Acc:HGNC:4250]	1.39922	0.802119	0.699579	0.841469	0.595634	0.408799	1.95795	1.81522	1.09474
ENSG00000130449	ZSWIM6	2950.79	1.59773	0.265467	6.01856	3.02667	1.76e-09	1.32e-08	57688	protein_coding	HGNC Symbol	1	zinc finger SWIM-type containing 6 [Source:HGNC Symbol;Acc:HGNC:29316]	26.8466	40.9245	44.9803	29.9033	39.3515	28.8817	55.4556	68.0709	63.2657
ENSG00000010539	ZNF200	419.423	1.59913	0.26663	5.99759	3.02961	2e-09	1.49e-08	7752	protein_coding	HGNC Symbol	10	zinc finger protein 200 [Source:HGNC Symbol;Acc:HGNC:12993]	6.71933	4.63265	4.79341	6.79408	6.90935	5.45747	7.41649	9.1054	9.92902
ENSG00000119778	ATAD2B	955.926	1.59914	0.298651	5.35454	3.02963	8.58e-08	5.13e-07	54454	protein_coding	HGNC Symbol	9	ATPase family, AAA domain containing 2B [Source:HGNC Symbol;Acc:HGNC:29230]	12.6391	12.6866	11.3617	9.55223	14.0437	9.11622	13.4288	23.7443	22.2767
ENSG00000163689	C3orf67	111.389	1.59969	0.413168	3.87177	3.03079	0.000108047	0.000369898	200844	protein_coding	HGNC Symbol	12	chromosome 3 open reading frame 67 [Source:HGNC Symbol;Acc:HGNC:24763]	1.39922	1.4078	1.43802	0.592145	0.516216	0.286159	1.34486	3.30839	2.24039
ENSG00000082258	CCNT2	1835.92	1.60012	0.179936	8.89273	3.03169	5.96e-19	1.4e-17	905	protein_coding	HGNC Symbol	10	cyclin T2 [Source:HGNC Symbol;Acc:HGNC:1600]	23.0179	24.4892	22.8788	29.9968	31.3303	22.0956	37.9131	40.8133	38.3668
ENSG00000141867	BRD4	14204.9	1.60343	0.253917	6.31479	3.03865	2.71e-10	2.26e-09	23476	protein_coding	HGNC Symbol	12	bromodomain containing 4 [Source:HGNC Symbol;Acc:HGNC:13575]	159.696	188.531	194.768	169.073	159.524	121.086	233.491	335.611	322.744
ENSG00000154025	SLC5A10	14.7748	1.60689	0.694182	2.31479	3.04594	0.0206242	0.0415957	125206	protein_coding	HGNC Symbol	6	solute carrier family 5 member 10 [Source:HGNC Symbol;Acc:HGNC:23155]	0.0768802	0.245547	0.233193	0.186993	0.119127	0.0817598	0.316437	0.351334	0.280049
ENSG00000157450	RNF111	3499.23	1.60735	0.288186	5.57746	3.04691	2.44e-08	1.58e-07	54778	protein_coding	HGNC Symbol	12	ring finger protein 111 [Source:HGNC Symbol;Acc:HGNC:17384]	38.1633	45.0333	50.2013	46.4989	55.6851	38.8155	52.1725	87.687	78.7448
ENSG00000131470	PSMC3IP	319.802	1.60784	0.249533	6.4434	3.04796	1.17e-10	1.03e-09	29893	protein_coding	HGNC Symbol	9	PSMC3 interacting protein [Source:HGNC Symbol;Acc:HGNC:17928]	3.21359	4.56717	4.40476	2.18159	1.77367	1.98268	9.07778	7.02667	4.91359
ENSG00000111266	DUSP16	1341.19	1.60807	0.159143	10.1046	3.04844	5.27e-24	2.01e-22	80824	protein_coding	HGNC Symbol	6	dual specificity phosphatase 16 [Source:HGNC Symbol;Acc:HGNC:17909]	20.1272	15.8787	15.4555	31.4148	30.1523	24.4666	37.2604	24.3299	26.2992
ENSG00000156502	SUPV3L1	1578.94	1.60933	0.21992	7.31777	3.0511	2.52e-13	3.1e-12	6832	protein_coding	HGNC Symbol	7	Suv3 like RNA helicase [Source:HGNC Symbol;Acc:HGNC:11471]	20.1734	18.7761	21.3112	20.3822	19.8015	15.8818	29.5077	38.7345	31.9002
ENSG00000176809	LRRC37A3	356.529	1.61288	0.412612	3.90895	3.05862	9.27e-05	0.000321366	374819	protein_coding	HGNC Symbol	12	leucine rich repeat containing 37 member A3 [Source:HGNC Symbol;Acc:HGNC:32427]	6.25805	3.87964	3.5238	2.22833	2.55461	1.81916	3.73791	8.78334	9.39438
ENSG00000182378	PLCXD1	775.772	1.61329	0.156666	10.2976	3.05948	7.23e-25	2.98e-23	55344	protein_coding	HGNC Symbol	11	phosphatidylinositol specific phospholipase C X domain containing 1 [Source:HGNC Symbol;Acc:HGNC:23148]	9.79454	10.0347	9.76819	12.1078	11.5024	9.09578	22.0319	15.4294	13.5442
ENSG00000076604	TRAF4	3059.97	1.61569	0.175194	9.2223	3.06459	2.91e-20	7.93e-19	9618	protein_coding	HGNC Symbol	17	TNF receptor associated factor 4 [Source:HGNC Symbol;Acc:HGNC:12034]	36.2413	38.5181	41.5472	43.3824	42.2371	34.4209	65.7991	62.1568	68.2302
ENSG00000099937	SERPIND1	571.214	1.61574	0.295338	5.47081	3.06468	4.48e-08	2.79e-07	3053	protein_coding	HGNC Symbol	2	serpin family D member 1 [Source:HGNC Symbol;Acc:HGNC:4838]	4.30529	7.9066	9.36658	1.51153	1.9325	2.12576	14.9319	12.0332	10.3109
ENSG00000092969	TGFB2	1540.79	1.61798	0.191037	8.46948	3.06945	2.46e-17	4.69e-16	7042	protein_coding	HGNC Symbol	4	transforming growth factor beta 2 [Source:HGNC Symbol;Acc:HGNC:11768]	20.6654	17.4829	20.5469	14.6166	15.1556	10.2404	48.9093	28.458	25.2554
ENSG00000174106	LEMD3	1612.42	1.62334	0.228847	7.09356	3.08087	1.31e-12	1.47e-11	23592	protein_coding	HGNC Symbol	6	LEM domain containing 3 [Source:HGNC Symbol;Acc:HGNC:28887]	20.4655	20.2003	20.4303	19.0889	24.5401	16.2906	28.4793	35.9531	37.603
ENSG00000157617	C2CD2	3495.85	1.62785	0.158493	10.2708	3.09052	9.54e-25	3.9e-23	25966	protein_coding	HGNC Symbol	8	C2 calcium dependent domain containing 2 [Source:HGNC Symbol;Acc:HGNC:1266]	53.3856	41.0718	38.3214	54.4306	69.0538	45.2745	94.2586	65.7287	69.1467
ENSG00000083896	YTHDC1	3684.47	1.62987	0.207395	7.85875	3.09485	3.88e-15	5.94e-14	91746	protein_coding	HGNC Symbol	7	YTH domain containing 1 [Source:HGNC Symbol;Acc:HGNC:30626]	51.3406	45.6062	42.5059	55.646	53.0908	46.0921	69.4183	82.9147	82.1054
ENSG00000048649	RSF1	5350.19	1.63108	0.218278	7.47247	3.09744	7.87e-14	1.05e-12	51773	protein_coding	HGNC Symbol	12	remodeling and spacing factor 1 [Source:HGNC Symbol;Acc:HGNC:18118]	68.3158	71.3231	62.405	60.0092	66.4463	45.0906	97.3241	119.19	123.094
ENSG00000175556	LONRF3	278.893	1.63329	0.324883	5.02731	3.10219	4.97e-07	2.62e-06	79836	protein_coding	HGNC Symbol	6	LON peptidase N-terminal domain and ring finger 3 [Source:HGNC Symbol;Acc:HGNC:21152]	5.5815	2.70101	2.34488	3.78661	3.81206	3.00467	6.48696	6.14834	5.42277
ENSG00000092295	TGM1	36.1454	1.63672	0.548351	2.98481	3.10959	0.00283758	0.00719292	7051	protein_coding	HGNC Symbol	9	transglutaminase 1 [Source:HGNC Symbol;Acc:HGNC:11777]	0.307521	0.392875	0.634803	0.296072	0.370617	0.592759	0.454878	0.93689	0.865607
ENSG00000085117	CD82	3277.2	1.63721	0.240637	6.80365	3.11064	1.02e-11	1.02e-10	3732	protein_coding	HGNC Symbol	14	CD82 molecule [Source:HGNC Symbol;Acc:HGNC:6210]	39.3165	44.5094	39.4873	88.4321	91.8997	70.293	114.451	46.1711	60.6689
ENSG00000177483	RBM44	27.9776	1.63804	0.564954	2.89943	3.11243	0.00373844	0.00922591	375316	protein_coding	HGNC Symbol	6	RNA binding motif protein 44 [Source:HGNC Symbol;Acc:HGNC:24756]	0.384401	0.163698	0.492296	1.02846	0.542689	0.490559	0.494433	0.702667	0.585558
ENSG00000054267	ARID4B	2807.7	1.63936	0.159262	10.2935	3.11529	7.54e-25	3.1e-23	51742	protein_coding	HGNC Symbol	13	AT-rich interaction domain 4B [Source:HGNC Symbol;Acc:HGNC:15550]	41.3462	34.0328	30.5094	38.1154	40.7678	26.388	65.9375	57.6187	58.4794
ENSG00000163935	SFMBT1	230.598	1.63986	0.221617	7.39952	3.11635	1.37e-13	1.76e-12	51460	protein_coding	HGNC Symbol	8	Scm like with four mbt domains 1 [Source:HGNC Symbol;Acc:HGNC:20255]	3.16747	2.94656	2.56512	6.09286	5.0298	2.82071	5.93319	5.38712	3.76794
ENSG00000167216	KATNAL2	52.675	1.64162	0.476903	3.44224	3.12015	0.000576908	0.0017007	83473	protein_coding	HGNC Symbol	8	katanin catalytic subunit A1 like 2 [Source:HGNC Symbol;Acc:HGNC:25387]	0.599666	0.75301	0.608893	1.57386	1.60159	1.36948	0.692206	0.966167	1.62938
ENSG00000176407	KCMF1	4330.79	1.6427	0.220851	7.43805	3.1225	1.02e-13	1.34e-12	56888	protein_coding	HGNC Symbol	4	potassium channel modulatory factor 1 [Source:HGNC Symbol;Acc:HGNC:20589]	50.8947	53.9221	57.508	46.421	47.6639	36.4036	78.9114	99.1053	97.4572
ENSG00000072364	AFF4	10687.3	1.6462	0.235888	6.97872	3.13007	2.98e-12	3.19e-11	27125	protein_coding	HGNC Symbol	9	AF4/FMR2 family member 4 [Source:HGNC Symbol;Acc:HGNC:17869]	122.024	141.828	135.861	145.979	168.988	115.731	186.876	258.962	232.543
ENSG00000180592	SKIDA1	78.3819	1.64656	0.360787	4.56382	3.13087	5.02e-06	2.22e-05	387640	protein_coding	HGNC Symbol	4	SKI/DACH domain containing 1 [Source:HGNC Symbol;Acc:HGNC:32697]	1.18396	0.818489	0.919816	2.74256	2.47519	2.06444	1.38441	2.108	1.50208
ENSG00000048392	RRM2B	3449.66	1.64824	0.166225	9.9157	3.1345	3.56e-23	1.22e-21	50484	protein_coding	HGNC Symbol	11	ribonucleotide reductase regulatory TP53 inducible subunit M2B [Source:HGNC Symbol;Acc:HGNC:17296]	53.4471	39.222	37.0129	51.5789	49.3317	31.4367	87.4355	68.8907	69.1722
ENSG00000010030	ETV7	29.0139	1.64949	0.699605	2.35774	3.13722	0.0183864	0.0377237	51513	protein_coding	HGNC Symbol	8	ETS variant 7 [Source:HGNC Symbol;Acc:HGNC:18160]	0.645794	0.0982187	0.362745	1.16871	1.45599	0.899358	1.16686	0.527	0.305508
ENSG00000119547	ONECUT2	17.7117	1.64983	0.663613	2.48613	3.13797	0.012914	0.0276276	9480	protein_coding	HGNC Symbol	2	one cut homeobox 2 [Source:HGNC Symbol;Acc:HGNC:8139]	0.230641	0.278286	0.155462	0.249324	0.304435	0.0408799	0.375769	0.175667	0.585558
ENSG00000168026	TTC21A	123.79	1.65387	0.272339	6.07283	3.14677	1.26e-09	9.66e-09	199223	protein_coding	HGNC Symbol	18	tetratricopeptide repeat domain 21A [Source:HGNC Symbol;Acc:HGNC:30761]	1.89125	1.50602	1.23074	1.32453	1.69425	1.55344	2.76882	2.54717	2.69866
ENSG00000089022	MAPKAPK5	1017.7	1.65571	0.183775	9.00942	3.15077	2.07e-19	5.16e-18	8550	protein_coding	HGNC Symbol	10	mitogen-activated protein kinase-activated protein kinase 5 [Source:HGNC Symbol;Acc:HGNC:6889]	12.1471	12.6047	13.1106	14.2582	13.501	12.08	21.399	22.6903	21.4874
ENSG00000184677	ZBTB40	2189.42	1.65677	0.226521	7.31398	3.15309	2.59e-13	3.16e-12	9923	protein_coding	HGNC Symbol	5	zinc finger and BTB domain containing 40 [Source:HGNC Symbol;Acc:HGNC:29045]	26.2623	27.1738	28.035	23.6858	33.2496	24.1192	40.0886	54.8959	44.7061
ENSG00000120279	MYCT1	12495.9	1.6579	0.12913	12.8391	3.15557	9.91e-38	1.08e-35	80177	protein_coding	HGNC Symbol	3	MYC target 1 [Source:HGNC Symbol;Acc:HGNC:23172]	160.188	156.79	148.622	85.2532	88.7759	53.798	345.292	258.055	221.774
ENSG00000055044	NOP58	3549.78	1.66663	0.134419	12.3988	3.17472	2.65e-35	2.18e-33	51602	protein_coding	HGNC Symbol	10	NOP58 ribonucleoprotein [Source:HGNC Symbol;Acc:HGNC:29926]	47.6196	42.0212	42.1043	37.2116	32.5613	25.1412	83.836	72.404	74.9768
ENSG00000183621	ZNF438	1081.3	1.66695	0.191851	8.68876	3.17542	3.66e-18	7.7e-17	220929	protein_coding	HGNC Symbol	9	zinc finger protein 438 [Source:HGNC Symbol;Acc:HGNC:21029]	10.8709	14.389	14.6912	12.2325	11.317	9.50458	30.5362	20.6994	20.3927
ENSG00000005339	CREBBP	12970.6	1.66731	0.21428	7.78098	3.17621	7.2e-15	1.08e-13	1387	protein_coding	HGNC Symbol	20	CREB binding protein [Source:HGNC Symbol;Acc:HGNC:2348]	151.423	163.616	165.01	190.156	215.686	175.395	240.096	300.01	288.985
ENSG00000091137	SLC26A4	56.2762	1.66786	0.480504	3.47106	3.17743	0.000518401	0.00154486	5172	protein_coding	HGNC Symbol	9	solute carrier family 26 member 4 [Source:HGNC Symbol;Acc:HGNC:8818]	0.507409	0.982187	0.608893	3.47495	1.90603	1.28772	2.31394	0.761223	0.814689
ENSG00000041802	LSG1	3431.89	1.66845	0.15552	10.7282	3.17874	7.5e-27	3.71e-25	55341	protein_coding	HGNC Symbol	8	large 60S subunit nuclear export GTPase 1 [Source:HGNC Symbol;Acc:HGNC:25652]	46.6202	40.9245	39.7335	49.4908	52.4555	42.5151	76.8348	70.1203	75.6133
ENSG00000155962	CLIC2	89.573	1.67028	0.382584	4.36577	3.18275	1.27e-05	5.23e-05	1193	protein_coding	HGNC Symbol	4	chloride intracellular channel 2 [Source:HGNC Symbol;Acc:HGNC:2063]	0.830306	1.45691	1.03641	19.8524	16.5586	13.4291	3.10504	1.17111	1.78213
ENSG00000274618	HIST1H4F	11.8328	1.6704	0.712588	2.34413	3.18303	0.0190716	0.0388769	8361	protein_coding	HGNC Symbol	1	histone cluster 1 H4 family member f [Source:HGNC Symbol;Acc:HGNC:4783]	0.0922563	0.130958	0.207283	0.186993	0.158836	0.2044	0.276882	0.292778	0.203672
ENSG00000063127	SLC6A16	84.1273	1.67067	0.46989	3.55545	3.18363	0.000377336	0.0011555	28968	protein_coding	HGNC Symbol	7	solute carrier family 6 member 16 [Source:HGNC Symbol;Acc:HGNC:13622]	0.445905	1.4078	1.21779	1.27779	1.89279	1.08332	1.58218	1.63956	2.16402
ENSG00000163617	CCDC191	148.225	1.67399	0.329495	5.08047	3.19096	3.77e-07	2.03e-06	57577	protein_coding	HGNC Symbol	8	coiled-coil domain containing 191 [Source:HGNC Symbol;Acc:HGNC:29272]	2.47554	1.7352	1.29552	2.44649	2.59432	1.69652	3.28303	2.40078	3.92069
ENSG00000055163	CYFIP2	5859.94	1.67812	0.25404	6.60573	3.2001	3.96e-11	3.68e-10	26999	protein_coding	HGNC Symbol	24	cytoplasmic FMR1 interacting protein 2 [Source:HGNC Symbol;Acc:HGNC:13760]	52.6783	81.6361	80.4645	43.0707	62.2371	40.9004	113.324	124.577	138.344
ENSG00000163093	BBS5	431.293	1.68202	0.197641	8.51051	3.20878	1.73e-17	3.37e-16	129880	protein_coding	HGNC Symbol	6	Bardet-Biedl syndrome 5 [Source:HGNC Symbol;Acc:HGNC:970]	6.08891	4.79635	5.03956	3.86452	4.64594	3.10687	12.9344	8.75406	7.12853
ENSG00000167676	PLIN4	36.8546	1.68249	0.579776	2.90197	3.20981	0.00370828	0.00915699	729359	protein_coding	HGNC Symbol	2	perilipin 4 [Source:HGNC Symbol;Acc:HGNC:29393]	0.292145	0.572942	0.466386	1.05963	1.29716	0.919798	0.474655	1.28822	0.560099
ENSG00000118454	ANKRD13C	1732.01	1.68316	0.196569	8.5627	3.21131	1.1e-17	2.18e-16	81573	protein_coding	HGNC Symbol	5	ankyrin repeat domain 13C [Source:HGNC Symbol;Acc:HGNC:25374]	24.2788	19.8565	19.6271	26.8803	27.6506	19.4588	34.8872	39.5543	37.2466
ENSG00000092203	TOX4	6255.98	1.68376	0.207405	8.11823	3.21265	4.73e-16	8.06e-15	9878	protein_coding	HGNC Symbol	12	TOX high mobility group box family member 4 [Source:HGNC Symbol;Acc:HGNC:20161]	79.1559	73.0256	77.7051	67.6915	63.1372	51.4065	117.398	145.13	138.777
ENSG00000075856	SART3	4339.14	1.68431	0.24239	6.94874	3.21386	3.69e-12	3.9e-11	9733	protein_coding	HGNC Symbol	17	spliceosome associated factor 3, U4/U6 recycling protein [Source:HGNC Symbol;Acc:HGNC:16860]	47.3582	54.7405	56.8732	70.4964	71.3437	63.5683	75.5097	103.79	97.6608
ENSG00000166343	MSS51	38.0779	1.68457	0.418696	4.02336	3.21444	5.74e-05	0.000206943	118490	protein_coding	HGNC Symbol	3	MSS51 mitochondrial translational activator [Source:HGNC Symbol;Acc:HGNC:21000]	0.522785	0.507463	0.362745	0.186993	0.35738	0.14308	0.791092	0.93689	0.738312
ENSG00000110768	GTF2H1	3043.72	1.68709	0.218215	7.73131	3.22007	1.06e-14	1.56e-13	2965	protein_coding	HGNC Symbol	16	general transcription factor IIH subunit 1 [Source:HGNC Symbol;Acc:HGNC:4655]	43.3143	33.9673	34.6162	34.8586	37.247	29.8015	57.018	71.0572	67.2628
ENSG00000120215	MLANA	40.3616	1.69554	0.478039	3.54686	3.23898	0.000389849	0.00118983	2315	protein_coding	HGNC Symbol	5	melan-A [Source:HGNC Symbol;Acc:HGNC:7124]	0.369025	0.687531	0.40161	0.607727	0.780942	0.429239	0.672428	0.93689	0.967443
ENSG00000085721	RRN3	2014.09	1.69882	0.218995	7.75737	3.24636	8.67e-15	1.29e-13	54700	protein_coding	HGNC Symbol	6	RRN3 homolog, RNA polymerase I transcription factor [Source:HGNC Symbol;Acc:HGNC:30346]	27.969	23.2778	22.2958	28.7346	27.8227	20.3582	37.6362	45.7905	46.0299
ENSG00000085274	MYNN	982.167	1.69973	0.239738	7.08995	3.2484	1.34e-12	1.51e-11	55892	protein_coding	HGNC Symbol	5	myoneurin [Source:HGNC Symbol;Acc:HGNC:14955]	13.2849	11.7535	10.7657	8.19653	8.52418	6.37727	17.4436	23.8614	21.6402
ENSG00000143393	PI4KB	4657.42	1.70356	0.169578	10.0459	3.25703	9.58e-24	3.59e-22	5298	protein_coding	HGNC Symbol	13	phosphatidylinositol 4-kinase beta [Source:HGNC Symbol;Acc:HGNC:8984]	62.6881	53.9548	52.9477	81.6069	81.893	71.7238	99.4996	101.594	101.454
ENSG00000142347	MYO1F	114.759	1.70491	0.291806	5.84263	3.26009	5.14e-09	3.65e-08	4542	protein_coding	HGNC Symbol	23	myosin IF [Source:HGNC Symbol;Acc:HGNC:7600]	1.50685	1.32595	1.32143	2.43091	1.65454	1.57388	2.25461	2.28367	2.87687
ENSG00000119699	TGFB3	227.42	1.70558	0.39238	4.34675	3.2616	1.38e-05	5.68e-05	7043	protein_coding	HGNC Symbol	7	transforming growth factor beta 3 [Source:HGNC Symbol;Acc:HGNC:11769]	3.02908	2.45547	2.82423	2.8049	2.40901	2.12576	10.2644	2.83995	2.95325
ENSG00000164715	LMTK2	3052.58	1.70602	0.211735	8.05736	3.2626	7.8e-16	1.29e-14	22853	protein_coding	HGNC Symbol	2	lemur tyrosine kinase 2 [Source:HGNC Symbol;Acc:HGNC:17880]	34.8575	38.8946	36.8963	27.6282	39.0471	28.4933	58.0662	68.5686	70.0123
ENSG00000008517	IL32	7494.71	1.70701	0.375951	4.54053	3.26485	5.61e-06	2.46e-05	9235	protein_coding	HGNC Symbol	35	interleukin 32 [Source:HGNC Symbol;Acc:HGNC:16830]	114.613	75.4156	83.2887	129.165	93.3821	65.367	344.362	82.4463	104.407
ENSG00000270629	NBPF14	321.186	1.71571	0.280264	6.12175	3.28458	9.26e-10	7.22e-09	25832	protein_coding	HGNC Symbol	10	NBPF member 14 [Source:HGNC Symbol;Acc:HGNC:25232]	3.58262	4.28888	3.67927	4.45667	4.23562	3.63831	5.41898	7.64151	7.51041
ENSG00000165632	TAF3	1506.42	1.71765	0.242023	7.09705	3.289	1.27e-12	1.44e-11	83860	protein_coding	HGNC Symbol	1	TATA-box binding protein associated factor 3 [Source:HGNC Symbol;Acc:HGNC:17303]	18.9587	17.1883	18.202	17.7488	18.0278	12.9998	25.8687	35.4847	35.2098
ENSG00000063660	GPC1	5653.91	1.71913	0.215952	7.9607	3.29238	1.71e-15	2.73e-14	2817	protein_coding	HGNC Symbol	9	glypican 1 [Source:HGNC Symbol;Acc:HGNC:4449]	49.7415	73.6804	79.3892	55.1006	59.0207	46.7871	150.07	106.718	118.283
ENSG00000164604	GPR85	19.638	1.72126	0.580728	2.96397	3.29725	0.00303696	0.00766755	54329	protein_coding	HGNC Symbol	7	G protein-coupled receptor 85 [Source:HGNC Symbol;Acc:HGNC:4536]	0.338273	0.245547	0.129552	0.436317	0.423562	0.347479	0.474655	0.409889	0.407345
ENSG00000182600	SNORC	35.7933	1.72328	0.495331	3.47906	3.30187	0.00050318	0.00150496	389084	protein_coding	HGNC Symbol	8	secondary ossification center associated regulator of chondrocyte maturation [Source:HGNC Symbol;Acc:HGNC:33763]	0.58429	0.474724	0.233193	0.934965	0.926541	1.022	0.692206	0.731945	0.891066
ENSG00000131018	SYNE1	2861.38	1.72488	0.225432	7.65144	3.30552	1.99e-14	2.82e-13	23345	protein_coding	HGNC Symbol	40	spectrin repeat containing nuclear envelope protein 1 [Source:HGNC Symbol;Acc:HGNC:17089]	34.4885	37.1267	31.1831	36.4325	51.3172	37.957	52.489	68.5979	63.3421
ENSG00000111424	VDR	131.692	1.72576	0.334384	5.161	3.30753	2.46e-07	1.36e-06	7421	protein_coding	HGNC Symbol	8	vitamin D receptor [Source:HGNC Symbol;Acc:HGNC:12679]	1.4146	1.2441	2.03396	3.80219	2.39577	2.53456	2.37328	2.98634	3.13146
ENSG00000163681	SLMAP	3248.33	1.72618	0.216784	7.96266	3.30851	1.68e-15	2.7e-14	7871	protein_coding	HGNC Symbol	21	sarcolemma associated protein [Source:HGNC Symbol;Acc:HGNC:16643]	40.9925	39.4348	36.3004	31.2123	32.4157	24.2827	60.2219	77.674	71.6672
ENSG00000163293	NIPAL1	146.22	1.72835	0.323011	5.35075	3.31349	8.76e-08	5.23e-07	152519	protein_coding	HGNC Symbol	6	NIPA like domain containing 1 [Source:HGNC Symbol;Acc:HGNC:27194]	1.75287	1.68609	1.77486	1.37128	1.73396	1.34904	2.31394	3.63045	3.41151
ENSG00000166483	WEE1	1621.42	1.73078	0.151589	11.4176	3.31907	3.42e-30	2.14e-28	7465	protein_coding	HGNC Symbol	8	WEE1 G2 checkpoint kinase [Source:HGNC Symbol;Acc:HGNC:12761]	23.0333	17.663	17.6061	34.9521	23.971	14.7372	43.5101	31.825	32.5366
ENSG00000176915	ANKLE2	4515.51	1.73173	0.15521	11.1573	3.32126	6.6e-29	3.76e-27	23141	protein_coding	HGNC Symbol	12	ankyrin repeat and LEM domain containing 2 [Source:HGNC Symbol;Acc:HGNC:29101]	62.4421	48.7492	50.9397	38.2245	43.0048	32.847	105.156	98.7833	92.7473
ENSG00000109111	SUPT6H	15832.3	1.73909	0.19853	8.75985	3.33825	1.96e-18	4.26e-17	6830	protein_coding	HGNC Symbol	12	SPT6 homolog, histone chaperone [Source:HGNC Symbol;Acc:HGNC:11470]	180.315	195.357	188.536	198.54	212.443	173.842	310.86	366.968	349.553
ENSG00000143469	SYT14	26.4266	1.74053	0.512847	3.39386	3.34158	0.000689146	0.00200352	255928	protein_coding	HGNC Symbol	10	synaptotagmin 14 [Source:HGNC Symbol;Acc:HGNC:23143]	0.215265	0.327396	0.388655	0.716807	0.727997	0.408799	0.573542	0.468445	0.687394
ENSG00000096717	SIRT1	891.89	1.751	0.232095	7.54434	3.36593	4.55e-14	6.21e-13	23411	protein_coding	HGNC Symbol	6	sirtuin 1 [Source:HGNC Symbol;Acc:HGNC:14929]	12.1471	9.8055	9.70342	14.5387	13.8584	11.1398	16.6129	21.7534	19.4252
ENSG00000156802	ATAD2	2335.81	1.75371	0.167634	10.4615	3.37224	1.3e-25	5.95e-24	29028	protein_coding	HGNC Symbol	8	ATPase family, AAA domain containing 2 [Source:HGNC Symbol;Acc:HGNC:30123]	27.2002	26.8301	28.5661	15.2244	13.1701	11.0785	52.0934	54.7495	46.6155
ENSG00000154813	DPH3	2346.09	1.75394	0.132997	13.1878	3.37278	1.03e-39	1.23e-37	285381	protein_coding	HGNC Symbol	4	diphthamide biosynthesis 3 [Source:HGNC Symbol;Acc:HGNC:27717]	31.4748	25.2913	26.4544	29.4514	26.3138	20.2356	60.7954	47.7521	47.5575
ENSG00000122257	RBBP6	6089.99	1.7585	0.216515	8.12184	3.38346	4.59e-16	7.84e-15	5930	protein_coding	HGNC Symbol	14	RB binding protein 6, ubiquitin ligase [Source:HGNC Symbol;Acc:HGNC:9889]	74.5738	73.1074	67.4057	69.1874	73.5542	51.6518	112.691	144.691	137.301
ENSG00000163660	CCNL1	2009.66	1.75946	0.169225	10.3972	3.38572	2.55e-25	1.12e-23	57018	protein_coding	HGNC Symbol	26	cyclin L1 [Source:HGNC Symbol;Acc:HGNC:20569]	25.7395	21.9682	23.2675	29.1553	27.0815	15.6161	43.7672	43.3897	44.6806
ENSG00000073792	IGF2BP2	11816.2	1.76015	0.192745	9.13202	3.38734	6.72e-20	1.78e-18	10644	protein_coding	HGNC Symbol	11	insulin like growth factor 2 mRNA binding protein 2 [Source:HGNC Symbol;Acc:HGNC:28867]	133.602	141.844	140.952	88.214	83.9447	60.7476	236.695	273.015	260.573
ENSG00000003987	MTMR7	46.9189	1.76889	0.416766	4.24433	3.40791	2.19e-05	8.63e-05	9108	protein_coding	HGNC Symbol	9	myotubularin related protein 7 [Source:HGNC Symbol;Acc:HGNC:7454]	0.753426	0.523833	0.3757	0.607727	0.714761	0.572319	1.08775	1.20039	0.814689
ENSG00000117586	TNFSF4	3692.4	1.7713	0.284475	6.22654	3.41361	4.77e-10	3.86e-09	7292	protein_coding	HGNC Symbol	3	TNF superfamily member 4 [Source:HGNC Symbol;Acc:HGNC:11934]	26.6774	49.1257	52.7534	26.1946	32.2701	20.6239	120.088	63.7963	68.2302
ENSG00000184163	C1QTNF12	21.631	1.77188	0.654991	2.70519	3.41498	0.00682654	0.0157534	388581	protein_coding	HGNC Symbol	5	C1q and TNF related 12 [Source:HGNC Symbol;Acc:HGNC:32308]	0.184513	0.130958	0.42752	1.55828	0.688288	1.00156	0.415323	0.644112	0.356426
ENSG00000089048	ESF1	1076.07	1.77772	0.167648	10.6039	3.42884	2.86e-26	1.36e-24	51575	protein_coding	HGNC Symbol	2	ESF1 nucleolar pre-rRNA processing protein homolog [Source:HGNC Symbol;Acc:HGNC:15898]	13.3464	12.1627	12.0872	15.5048	13.6996	11.9165	23.8514	24.0078	23.0404
ENSG00000167207	NOD2	15.8875	1.78833	0.724194	2.46941	3.45415	0.0135335	0.028818	64127	protein_coding	HGNC Symbol	13	nucleotide binding oligomerization domain containing 2 [Source:HGNC Symbol;Acc:HGNC:5331]	0.292145	0.0818489	0.181372	0.389569	0.211781	0.16352	0.454878	0.468445	0.152754
ENSG00000176170	SPHK1	5333.75	1.795	0.181583	9.88529	3.47015	4.82e-23	1.64e-21	8877	protein_coding	NCBI gene	10	sphingosine kinase 1 [Source:NCBI gene;Acc:8877]	50.2797	62.3525	71.37	54.8513	40.8472	50.5276	139.687	110.934	106.724
ENSG00000164463	CREBRF	828.953	1.79554	0.278036	6.45793	3.47145	1.06e-10	9.4e-10	153222	protein_coding	HGNC Symbol	6	CREB3 regulatory factor [Source:HGNC Symbol;Acc:HGNC:24050]	12.1778	8.62687	7.99333	16.284	15.963	9.07534	14.0023	19.7625	19.9344
ENSG00000130203	APOE	94.8841	1.7969	0.693533	2.59094	3.47473	0.00957151	0.0212061	348	protein_coding	HGNC Symbol	5	apolipoprotein E [Source:HGNC Symbol;Acc:HGNC:613]	2.66006	0.360135	0.349789	2.55557	1.36334	1.6352	3.02593	2.40078	1.06928
ENSG00000182752	PAPPA	111.782	1.79724	0.354228	5.07368	3.47555	3.9e-07	2.09e-06	5069	protein_coding	HGNC Symbol	3	pappalysin 1 [Source:HGNC Symbol;Acc:HGNC:8602]	0.799554	1.63698	1.39916	3.14772	5.82397	3.45435	2.90726	2.75211	1.83305
ENSG00000176208	ATAD5	489.401	1.79766	0.214727	8.37183	3.47656	5.67e-17	1.04e-15	79915	protein_coding	HGNC Symbol	3	ATPase family, AAA domain containing 5 [Source:HGNC Symbol;Acc:HGNC:25752]	5.79677	6.20415	4.89705	2.60232	2.64726	1.9418	10.2051	10.9792	10.9983
ENSG00000270885	RASL10B	36.4221	1.8081	0.62844	2.87712	3.5018	0.00401321	0.0098419	91608	protein_coding	HGNC Symbol	2	RAS like family 10 member B [Source:HGNC Symbol;Acc:HGNC:30295]	0.415153	0.343765	0.479341	0.264907	0.158836	0.12264	0.276882	0.761223	1.24749
ENSG00000165891	E2F7	1465.5	1.81375	0.264822	6.84894	3.51555	7.44e-12	7.59e-11	144455	protein_coding	HGNC Symbol	7	E2F transcription factor 7 [Source:HGNC Symbol;Acc:HGNC:23820]	13.2541	17.5484	19.1866	16.8761	19.0868	15.0029	26.2247	35.2212	34.0896
ENSG00000118971	CCND2	525.269	1.81468	0.324203	5.59734	3.51781	2.18e-08	1.42e-07	894	protein_coding	HGNC Symbol	4	cyclin D2 [Source:HGNC Symbol;Acc:HGNC:1583]	3.21359	7.66106	6.96988	11.204	9.42425	6.23419	15.723	10.54	9.49622
ENSG00000184371	CSF1	3096.99	1.81851	0.282492	6.43738	3.52716	1.22e-10	1.07e-09	1435	protein_coding	HGNC Symbol	9	colony stimulating factor 1 [Source:HGNC Symbol;Acc:HGNC:2432]	54.2928	27.1902	25.431	183.3	108.591	89.6905	77.3095	55.5985	74.2131
ENSG00000108821	COL1A1	70.512	1.81931	0.390447	4.65956	3.52913	3.17e-06	1.45e-05	1277	protein_coding	HGNC Symbol	13	collagen type I alpha 1 chain [Source:HGNC Symbol;Acc:HGNC:2197]	0.568914	0.802119	1.0105	20.0394	22.0649	19.1522	1.36463	1.40533	1.85851
ENSG00000180336	MEIOC	64.5005	1.8203	0.332981	5.46668	3.53155	4.59e-08	2.85e-07	284071	protein_coding	HGNC Symbol	7	meiosis specific with coiled-coil domain [Source:HGNC Symbol;Acc:HGNC:26670]	0.907187	0.73664	0.570027	1.3557	0.979487	0.735839	1.64152	1.22967	1.45116
ENSG00000059915	PSD	15.8791	1.82261	0.663591	2.74659	3.53721	0.00602188	0.0140825	5662	protein_coding	HGNC Symbol	9	pleckstrin and Sec7 domain containing [Source:HGNC Symbol;Acc:HGNC:9507]	0.261393	0.147328	0.129552	0.4519	0.463271	0.265719	0.237328	0.409889	0.381885
ENSG00000156983	BRPF1	2638.57	1.82803	0.17614	10.3782	3.55052	3.11e-25	1.35e-23	7862	protein_coding	HGNC Symbol	8	bromodomain and PHD finger containing 1 [Source:HGNC Symbol;Acc:HGNC:14255]	29.2145	30.1204	30.3021	41.5592	41.3767	37.6708	56.5433	59.4339	58.6067
ENSG00000165338	HECTD2	456.139	1.82931	0.230628	7.93185	3.55367	2.16e-15	3.4e-14	143279	protein_coding	HGNC Symbol	6	HECT domain E3 ubiquitin protein ligase 2 [Source:HGNC Symbol;Acc:HGNC:26736]	6.94997	4.30525	4.32702	6.70058	5.74456	3.67919	10.8775	10.1887	9.39438
ENSG00000164070	HSPA4L	1168.8	1.83098	0.183457	9.98045	3.55779	1.86e-23	6.6e-22	22824	protein_coding	HGNC Symbol	5	heat shock protein family A (Hsp70) member 4 like [Source:HGNC Symbol;Acc:HGNC:17041]	13.5617	12.1627	13.9268	70.9794	79.2987	55.4127	25.137	26.35	25.9173
ENSG00000080031	PTPRH	44.9799	1.83407	0.451034	4.06638	3.56542	4.77e-05	0.000174764	5794	protein_coding	HGNC Symbol	7	protein tyrosine phosphatase, receptor type H [Source:HGNC Symbol;Acc:HGNC:9672]	0.307521	0.507463	0.686624	1.40245	1.24421	1.38992	0.929533	1.054	0.992902
ENSG00000120709	FAM53C	5541.89	1.83545	0.242603	7.56563	3.56882	3.86e-14	5.34e-13	51307	protein_coding	HGNC Symbol	11	family with sequence similarity 53 member C [Source:HGNC Symbol;Acc:HGNC:1336]	65.7326	58.6038	63.4932	53.0749	48.7228	36.4445	95.3859	137.898	128.186
ENSG00000266967	AARSD1	10.2544	1.8388	0.75254	2.44346	3.57713	0.0145472	0.0307216	80755	protein_coding	HGNC Symbol	19	alanyl-tRNA synthetase domain containing 1 [Source:HGNC Symbol;Acc:HGNC:28417]	0.0922563	0.163698	0.0906861	0.202576	0.158836	0.0817598	0.276882	0.2635	0.152754
ENSG00000055609	KMT2C	6399.69	1.8407	0.274284	6.71095	3.58184	1.93e-11	1.85e-10	58508	protein_coding	HGNC Symbol	13	lysine methyltransferase 2C [Source:HGNC Symbol;Acc:HGNC:13726]	56.3532	82.1108	76.7464	68.2525	111.092	72.9502	109.131	159.74	148.604
ENSG00000163297	ANTXR2	5810.95	1.84944	0.176033	10.5062	3.6036	8.09e-26	3.75e-24	118429	protein_coding	HGNC Symbol	9	ANTXR cell adhesion molecule 2 [Source:HGNC Symbol;Acc:HGNC:21732]	59.3669	67.7709	67.8203	112.492	115.818	93.8603	128.295	128.588	129.612
ENSG00000179772	FOXS1	50.8968	1.85061	0.57006	3.24634	3.60652	0.001169	0.00323266	2307	protein_coding	HGNC Symbol	1	forkhead box S1 [Source:HGNC Symbol;Acc:HGNC:3735]	0.215265	0.703901	0.764355	0.763555	1.03243	1.06288	0.870201	0.849056	1.60392
ENSG00000055208	TAB2	6376.66	1.85091	0.205574	9.00361	3.60728	2.18e-19	5.4e-18	23118	protein_coding	HGNC Symbol	9	TGF-beta activated kinase 1 (MAP3K7) binding protein 2 [Source:HGNC Symbol;Acc:HGNC:17075]	77.6951	69.0805	67.6907	96.1923	96.903	66.4912	123.964	152.625	143.64
ENSG00000011243	AKAP8L	3412.37	1.85813	0.222747	8.34189	3.62537	7.31e-17	1.33e-15	26993	protein_coding	HGNC Symbol	20	A-kinase anchoring protein 8 like [Source:HGNC Symbol;Acc:HGNC:29857]	36.7949	37.8142	39.4355	38.4271	42.5547	30.3125	63.5643	78.9329	81.9017
ENSG00000179532	DNHD1	263.668	1.85886	0.309671	6.0027	3.62721	1.94e-09	1.45e-08	144132	protein_coding	HGNC Symbol	20	dynein heavy chain domain 1 [Source:HGNC Symbol;Acc:HGNC:26532]	2.41404	3.33944	3.0056	14.7257	16.2807	9.54546	4.48945	7.17306	5.60099
ENSG00000155749	ALS2CR12	18.9782	1.8616	0.695068	2.67829	3.63409	0.00739984	0.0169054	130540	protein_coding	HGNC Symbol	10	amyotrophic lateral sclerosis 2 chromosome region 12 [Source:HGNC Symbol;Acc:HGNC:14439]	0.307521	0.196437	0.129552	0.919382	1.0192	0.838038	0.237328	0.322056	0.661935
ENSG00000164675	IQUB	22.4169	1.8647	0.613657	3.03866	3.64191	0.00237632	0.0061528	154865	protein_coding	HGNC Symbol	6	IQ motif and ubiquitin domain containing [Source:HGNC Symbol;Acc:HGNC:21995]	0.184513	0.212807	0.336834	0.327238	0.291199	0.265719	0.336214	0.409889	0.712853
ENSG00000180758	GPR157	624.408	1.87307	0.192161	9.7474	3.66312	1.89e-22	6.07e-21	80045	protein_coding	HGNC Symbol	3	G protein-coupled receptor 157 [Source:HGNC Symbol;Acc:HGNC:23687]	5.70451	7.77565	7.17716	10.1911	10.6288	7.15399	16.692	12.5016	13.1623
ENSG00000164946	FREM1	20.8709	1.87387	0.57396	3.26481	3.66515	0.00109536	0.00303822	158326	protein_coding	HGNC Symbol	9	FRAS1 related extracellular matrix 1 [Source:HGNC Symbol;Acc:HGNC:23399]	0.15376	0.245547	0.285014	0.373986	0.595634	0.551879	0.454878	0.351334	0.585558
ENSG00000165895	ARHGAP42	161.343	1.8744	0.24227	7.73683	3.66649	1.02e-14	1.5e-13	143872	protein_coding	HGNC Symbol	9	Rho GTPase activating protein 42 [Source:HGNC Symbol;Acc:HGNC:26545]	2.21415	1.45691	1.69713	7.82254	9.19923	6.33639	4.37078	3.54261	3.05508
ENSG00000176994	SMCR8	2626.17	1.87796	0.278416	6.74517	3.67556	1.53e-11	1.49e-10	140775	protein_coding	HGNC Symbol	1	Smith-Magenis syndrome chromosome region, candidate 8 [Source:HGNC Symbol;Acc:HGNC:17921]	28.9992	28.467	29.4082	43.8655	48.6699	38.468	40.4841	68.6272	62.0946
ENSG00000158077	NLRP14	24.7936	1.88019	0.478431	3.92992	3.68125	8.5e-05	0.000296727	338323	protein_coding	HGNC Symbol	1	NLR family pyrin domain containing 14 [Source:HGNC Symbol;Acc:HGNC:22939]	0.292145	0.278286	0.246148	0.420734	0.450034	0.24528	0.573542	0.556278	0.53464
ENSG00000083844	ZNF264	1616.95	1.88045	0.233221	8.06295	3.6819	7.45e-16	1.24e-14	9422	protein_coding	HGNC Symbol	6	zinc finger protein 264 [Source:HGNC Symbol;Acc:HGNC:13057]	18.8972	18.1377	16.4271	23.9663	24.7519	20.583	29.6264	36.6851	40.2253
ENSG00000162924	REL	1167.53	1.88127	0.21445	8.77253	3.68398	1.75e-18	3.84e-17	5966	protein_coding	HGNC Symbol	3	REL proto-oncogene, NF-kB subunit [Source:HGNC Symbol;Acc:HGNC:9954]	15.8373	11.9827	10.8823	19.0265	18.9412	10.9558	24.5634	27.5797	25.5863
ENSG00000089091	DZANK1	116.359	1.8877	0.281325	6.71003	3.70046	1.95e-11	1.86e-10	55184	protein_coding	HGNC Symbol	11	double zinc ribbon and ankyrin repeat domains 1 [Source:HGNC Symbol;Acc:HGNC:15858]	1.26084	1.37506	1.17892	1.29337	1.42952	1.10376	2.68971	3.04489	2.08764
ENSG00000137819	PAQR5	23.1871	1.88775	0.553352	3.41149	3.70059	0.000646094	0.00189108	54852	protein_coding	HGNC Symbol	6	progestin and adipoQ receptor family member 5 [Source:HGNC Symbol;Acc:HGNC:29645]	0.384401	0.180068	0.207283	1.18429	0.807415	0.265719	0.711983	0.556278	0.330967
ENSG00000081087	OSTM1	1603.9	1.89224	0.215554	8.77848	3.7121	1.66e-18	3.65e-17	28962	protein_coding	HGNC Symbol	7	osteoclastogenesis associated transmembrane protein 1 [Source:HGNC Symbol;Acc:HGNC:21652]	21.5418	15.9605	15.3519	28.8437	34.0703	26.204	32.9688	38.2661	35.5153
ENSG00000164484	TMEM200A	121.341	1.89333	0.354322	5.34353	3.71492	9.12e-08	5.42e-07	114801	protein_coding	HGNC Symbol	4	transmembrane protein 200A [Source:HGNC Symbol;Acc:HGNC:21075]	1.01482	1.29321	1.63235	1.24662	1.46923	1.65564	2.07662	2.95706	2.95325
ENSG00000058085	LAMC2	4669.87	1.89514	0.61923	3.06047	3.71957	0.00220987	0.00575083	3918	protein_coding	HGNC Symbol	4	laminin subunit gamma 2 [Source:HGNC Symbol;Acc:HGNC:6493]	35.165	55.1007	61.9775	11.6715	20.1986	16.9652	225.521	59.6682	56.7991
ENSG00000109667	SLC2A9	65.9842	1.8983	0.362269	5.24003	3.72774	1.61e-07	9.17e-07	56606	protein_coding	HGNC Symbol	13	solute carrier family 2 member 9 [Source:HGNC Symbol;Acc:HGNC:13446]	1.01482	0.572942	0.582982	1.16871	0.913305	0.981118	1.70085	1.61028	1.17112
ENSG00000005238	FAM214B	5328.3	1.90352	0.304012	6.26133	3.74124	3.82e-10	3.13e-09	80256	protein_coding	HGNC Symbol	9	family with sequence similarity 214 member B [Source:HGNC Symbol;Acc:HGNC:25666]	42.0689	63.2856	67.6259	69.1407	78.8619	64.1202	85.6753	138.952	124.8
ENSG00000180251	SLC9A4	11.9079	1.90527	0.821695	2.31871	3.74579	0.0204109	0.0412386	389015	protein_coding	HGNC Symbol	2	solute carrier family 9 member A4 [Source:HGNC Symbol;Acc:HGNC:11077]	0.0615042	0.261916	0.0647758	0.124662	0.0926541	0.22484	0.316437	0.2635	0.229131
ENSG00000095787	WAC	12508.8	1.90834	0.212036	9.00005	3.75376	2.26e-19	5.56e-18	51322	protein_coding	HGNC Symbol	24	WW domain containing adaptor with coiled-coil [Source:HGNC Symbol;Acc:HGNC:17327]	142.705	130.402	134.41	231.045	210.073	160.454	238.396	300.654	290.615
ENSG00000135655	USP15	3341.44	1.90955	0.236869	8.06162	3.75692	7.53e-16	1.25e-14	9958	protein_coding	HGNC Symbol	19	ubiquitin specific peptidase 15 [Source:HGNC Symbol;Acc:HGNC:12613]	38.8091	36.21	33.7741	36.7597	40.0531	27.0216	59.5297	82.3584	78.7957
ENSG00000075413	MARK3	5111.56	1.91098	0.175236	10.9052	3.76065	1.09e-27	5.7e-26	4140	protein_coding	HGNC Symbol	26	microtubule affinity regulating kinase 3 [Source:HGNC Symbol;Acc:HGNC:6897]	55.2769	54.6914	56.1218	65.1359	66.4595	54.0024	109.883	118.253	114.031
ENSG00000177150	FAM210A	1122.52	1.92192	0.13608	14.1234	3.78927	2.72e-45	4.57e-43	125228	protein_coding	HGNC Symbol	8	family with sequence similarity 210 member A [Source:HGNC Symbol;Acc:HGNC:28346]	11.7627	11.8681	12.6054	30.9162	19.9868	17.5375	29.9428	23.9492	22.7604
ENSG00000164199	ADGRV1	18.9225	1.9266	0.654442	2.94388	3.80159	0.00324121	0.00814317	84059	protein_coding	HGNC Symbol	37	adhesion G protein-coupled receptor V1 [Source:HGNC Symbol;Acc:HGNC:17416]	0.123008	0.245547	0.246148	1.19987	1.0589	0.981118	0.810869	0.322056	0.229131
ENSG00000095383	TBC1D2	982.792	1.93948	0.321082	6.04048	3.83569	1.54e-09	1.16e-08	55357	protein_coding	HGNC Symbol	6	TBC1 domain family member 2 [Source:HGNC Symbol;Acc:HGNC:18026]	11.8703	9.59269	10.0273	21.7224	18.5573	18.0689	13.8639	28.8679	21.6147
ENSG00000117281	CD160	13.2261	1.93976	0.833593	2.32699	3.83642	0.0199658	0.0404488	11126	protein_coding	HGNC Symbol	5	CD160 molecule [Source:HGNC Symbol;Acc:HGNC:17013]	0.123008	0.245547	0.0518206	0.4519	0.370617	0.24528	0.158218	0.292778	0.407345
ENSG00000111907	TPD52L1	16.295	1.94416	0.815182	2.38495	3.84815	0.0170817	0.0353647	7164	protein_coding	HGNC Symbol	17	TPD52 like 1 [Source:HGNC Symbol;Acc:HGNC:12006]	0.184513	0.245547	0.103641	1.29337	0.50298	0.388359	0.870201	0.0878334	0.25459
ENSG00000070495	JMJD6	1782.34	1.9508	0.186739	10.4467	3.86589	1.52e-25	6.81e-24	23210	protein_coding	HGNC Symbol	8	jumonji domain containing 6, arginine demethylase and lysine hydroxylase [Source:HGNC Symbol;Acc:HGNC:19355]	17.2058	18.1705	21.1687	28.345	31.198	30.8848	40.1479	41.4574	38.7996
ENSG00000119965	C10orf88	841.93	1.9512	0.15922	12.2547	3.86695	1.59e-34	1.29e-32	80007	protein_coding	HGNC Symbol	4	chromosome 10 open reading frame 88 [Source:HGNC Symbol;Acc:HGNC:25822]	9.82529	8.29948	8.69291	7.72905	8.03444	5.80495	22.467	15.8393	19.3743
ENSG00000178538	CA8	17.9652	1.95176	0.749494	2.60411	3.86847	0.00921133	0.0204965	767	protein_coding	HGNC Symbol	4	carbonic anhydrase 8 [Source:HGNC Symbol;Acc:HGNC:1382]	0.215265	0.130958	0.233193	3.59962	3.34879	2.88203	0.870201	0.351334	0.101836
ENSG00000164663	USP49	697.249	1.96824	0.193216	10.1867	3.9129	2.27e-24	8.93e-23	25862	protein_coding	HGNC Symbol	5	ubiquitin specific peptidase 49 [Source:HGNC Symbol;Acc:HGNC:20078]	8.56446	7.02264	6.41281	6.94991	7.06819	3.65875	15.901	16.6005	14.7662
ENSG00000154822	PLCL2	916.512	1.97486	0.170043	11.6139	3.93091	3.5e-31	2.36e-29	23228	protein_coding	HGNC Symbol	4	phospholipase C like 2 [Source:HGNC Symbol;Acc:HGNC:9064]	10.2251	9.55995	8.97793	15.2555	16.0027	13.1633	21.0431	20.4066	20.7491
ENSG00000143870	PDIA6	23344.5	1.98007	0.265214	7.46594	3.94513	8.27e-14	1.1e-12	10130	protein_coding	HGNC Symbol	8	protein disulfide isomerase family A member 6 [Source:HGNC Symbol;Acc:HGNC:30168]	258.748	237.476	235.058	262.585	230.907	339.59	379.151	548.051	619.596
ENSG00000175820	CCDC168	17.9798	1.98571	0.649569	3.05697	3.96058	0.00223589	0.00581486	643677	protein_coding	HGNC Symbol	1	coiled-coil domain containing 168 [Source:HGNC Symbol;Acc:HGNC:26851]	0.123008	0.180068	0.246148	0.436317	0.158836	0.347479	0.276882	0.380611	0.53464
ENSG00000109220	CHIC2	2838.93	1.99859	0.160198	12.4757	3.99608	1.01e-35	8.93e-34	26511	protein_coding	HGNC Symbol	4	cysteine rich hydrophobic domain 2 [Source:HGNC Symbol;Acc:HGNC:1935]	26.4314	29.2855	32.0252	18.6993	18.9941	14.6555	70.8027	60.0195	63.724
ENSG00000165006	UBAP1	5853.43	2.00422	0.207972	9.63697	4.01172	5.58e-22	1.7e-20	51271	protein_coding	HGNC Symbol	5	ubiquitin associated protein 1 [Source:HGNC Symbol;Acc:HGNC:12461]	64.2257	56.9177	59.7622	52.6697	47.4257	38.4271	115.242	142.963	135.9
ENSG00000052749	RRP12	2470.95	2.01193	0.226505	8.88248	4.0332	6.54e-19	1.53e-17	23223	protein_coding	HGNC Symbol	15	ribosomal RNA processing 12 homolog [Source:HGNC Symbol;Acc:HGNC:29100]	23.6637	25.0785	27.0892	15.9256	15.0894	15.0438	47.7029	63.5035	55.1443
ENSG00000184956	MUC6	40.9489	2.01197	0.492483	4.08535	4.03332	4.4e-05	0.000162452	4588	protein_coding	HGNC Symbol	4	mucin 6, oligomeric mucus/gel-forming [Source:HGNC Symbol;Acc:HGNC:7517]	0.261393	0.622052	0.362745	0.483065	1.4957	0.858478	0.771315	0.93689	1.04382
ENSG00000007312	CD79B	44.4991	2.01246	0.405874	4.95834	4.03471	7.11e-07	3.66e-06	974	protein_coding	HGNC Symbol	6	CD79b molecule [Source:HGNC Symbol;Acc:HGNC:1699]	0.615042	0.425614	0.336834	1.74527	1.69425	1.69652	1.14708	0.819778	1.09474
ENSG00000118094	TREH	10.0533	2.01552	0.806718	2.49842	4.04326	0.012475	0.0268141	11181	protein_coding	HGNC Symbol	5	trehalase [Source:HGNC Symbol;Acc:HGNC:12266]	0.107632	0.147328	0.0518206	0.249324	0.330908	0.12264	0.177996	0.292778	0.203672
ENSG00000108510	MED13	6881.19	2.01837	0.275529	7.32545	4.05126	2.38e-13	2.95e-12	9969	protein_coding	HGNC Symbol	6	mediator complex subunit 13 [Source:HGNC Symbol;Acc:HGNC:22474]	65.625	75.2846	69.5822	84.3027	96.9162	62.2397	109.902	180.849	167.266
ENSG00000019995	ZRANB1	1766.56	2.02252	0.182273	11.0961	4.06292	1.31e-28	7.32e-27	54764	protein_coding	HGNC Symbol	2	zinc finger RANBP2-type containing 1 [Source:HGNC Symbol;Acc:HGNC:18224]	20.281	16.5171	17.2822	20.6627	20.3442	12.9385	39.1195	39.3494	41.7783
ENSG00000272333	KMT2B	6351.73	2.0257	0.264291	7.66466	4.07189	1.79e-14	2.57e-13	9757	protein_coding	HGNC Symbol	5	lysine methyltransferase 2B [Source:HGNC Symbol;Acc:HGNC:15840]	55.2307	70.2755	67.7166	85.8142	100.967	76.1184	109.19	157.485	158.279
ENSG00000109927	TECTA	103.197	2.03461	0.333087	6.10834	4.09711	1.01e-09	7.82e-09	7007	protein_coding	HGNC Symbol	6	tectorin alpha [Source:HGNC Symbol;Acc:HGNC:11720]	0.968691	1.16225	0.984592	1.12196	0.847124	0.817598	1.97773	2.108	2.87687
ENSG00000165806	CASP7	3984.04	2.04017	0.186601	10.9333	4.11293	7.99e-28	4.23e-26	840	protein_coding	HGNC Symbol	12	caspase 7 [Source:HGNC Symbol;Acc:HGNC:1508]	38.7169	41.7757	40.0444	52.062	56.9691	47.0119	136.424	72.4918	74.4167
ENSG00000166963	MAP1A	716.13	2.04289	0.222348	9.18783	4.12071	4.01e-20	1.08e-18	4130	protein_coding	HGNC Symbol	2	microtubule associated protein 1A [Source:HGNC Symbol;Acc:HGNC:6835]	7.73415	6.90805	7.06056	8.9445	14.1496	11.7734	25.3743	14.4047	11.3802
ENSG00000008294	SPAG9	5924.62	2.04655	0.213794	9.57253	4.13117	1.04e-21	3.07e-20	9043	protein_coding	HGNC Symbol	22	sperm associated antigen 9 [Source:HGNC Symbol;Acc:HGNC:14524]	57.8139	61.7632	58.946	107.287	115.725	90.6921	116.627	149.814	134.653
ENSG00000184156	KCNQ3	19.8323	2.04776	0.553851	3.69731	4.13463	0.000217899	0.000699884	3786	protein_coding	HGNC Symbol	8	potassium voltage-gated channel subfamily Q member 3 [Source:HGNC Symbol;Acc:HGNC:6297]	0.184513	0.261916	0.155462	0.202576	0.25149	0.12264	0.573542	0.351334	0.458263
ENSG00000166257	SCN3B	250.391	2.06011	0.28181	7.31026	4.17017	2.67e-13	3.25e-12	55800	protein_coding	HGNC Symbol	6	sodium voltage-gated channel beta subunit 3 [Source:HGNC Symbol;Acc:HGNC:20665]	1.92201	3.25759	2.30602	5.22022	3.63998	2.1462	7.97025	4.216	5.49915
ENSG00000164530	PI16	9.68229	2.06612	0.772194	2.67565	4.1876	0.00745837	0.0170202	221476	protein_coding	HGNC Symbol	4	peptidase inhibitor 16 [Source:HGNC Symbol;Acc:HGNC:21245]	0.0922563	0.0654791	0.129552	13.557	4.57976	6.72475	0.29666	0.234222	0.152754
ENSG00000167772	ANGPTL4	5815.18	2.07174	0.630889	3.28385	4.20394	0.001024	0.00286545	51129	protein_coding	HGNC Symbol	11	angiopoietin like 4 [Source:HGNC Symbol;Acc:HGNC:16039]	19.5737	74.3843	76.8241	98.0467	122.581	101.75	116.607	125.25	153.289
ENSG00000143153	ATP1B1	2090.97	2.0794	0.247018	8.41801	4.22631	3.83e-17	7.16e-16	481	protein_coding	HGNC Symbol	3	ATPase Na+/K+ transporting subunit beta 1 [Source:HGNC Symbol;Acc:HGNC:804]	20.281	20.1185	21.5315	46.6703	31.5951	28.5342	81.6803	35.5725	34.5734
ENSG00000090020	SLC9A1	13327.9	2.08094	0.267863	7.76868	4.23083	7.93e-15	1.18e-13	6548	protein_coding	HGNC Symbol	6	solute carrier family 9 member A1 [Source:HGNC Symbol;Acc:HGNC:11071]	98.5143	146.657	147.222	158.134	162.211	124.398	247.731	330.868	323.839
ENSG00000135905	DOCK10	1739.97	2.0827	0.306682	6.79107	4.23598	1.11e-11	1.1e-10	55619	protein_coding	HGNC Symbol	14	dedicator of cytokinesis 10 [Source:HGNC Symbol;Acc:HGNC:23479]	9.82529	20.5604	20.6117	26.6153	43.243	33.6237	37.5769	40.8133	40.709
ENSG00000177875	CCDC184	78.836	2.08402	0.370733	5.62135	4.23988	1.89e-08	1.25e-07	387856	protein_coding	HGNC Symbol	1	coiled-coil domain containing 184 [Source:HGNC Symbol;Acc:HGNC:33749]	0.461281	0.998557	0.855041	2.58674	1.65454	1.20596	2.23484	1.581	1.70576
ENSG00000047648	ARHGAP6	64.0067	2.09077	0.328165	6.37109	4.25975	1.88e-10	1.61e-09	395	protein_coding	HGNC Symbol	8	Rho GTPase activating protein 6 [Source:HGNC Symbol;Acc:HGNC:676]	0.58429	0.556573	0.738444	2.18159	2.27664	2.555	1.83929	1.22967	1.42571
ENSG00000053524	MCF2L2	39.1952	2.09246	0.459511	4.55367	4.26474	5.27e-06	2.32e-05	23101	protein_coding	HGNC Symbol	14	MCF.2 cell line derived transforming sequence-like 2 [Source:HGNC Symbol;Acc:HGNC:30319]	0.445905	0.327396	0.3757	0.62331	0.675052	0.572319	0.810869	0.644112	1.22203
ENSG00000137203	TFAP2A	72.1131	2.09301	0.451965	4.63091	4.26636	3.64e-06	1.65e-05	7020	protein_coding	HGNC Symbol	19	transcription factor AP-2 alpha [Source:HGNC Symbol;Acc:HGNC:11742]	0.707298	0.654791	0.77731	3.11655	1.58836	0.940238	3.38192	0.995445	0.992902
ENSG00000177675	CD163L1	748.617	2.09554	0.290245	7.21991	4.27387	5.2e-13	6.11e-12	283316	protein_coding	HGNC Symbol	10	CD163 molecule like 1 [Source:HGNC Symbol;Acc:HGNC:30375]	5.12022	8.18489	8.51154	3.31913	4.36798	3.39303	14.6748	20.2602	16.0646
ENSG00000055483	USP36	4703.3	2.09807	0.230339	9.10861	4.28135	8.34e-20	2.17e-18	57602	protein_coding	HGNC Symbol	24	ubiquitin specific peptidase 36 [Source:HGNC Symbol;Acc:HGNC:20062]	44.4368	44.4931	48.7503	34.9521	35.4998	29.9241	88.8396	121.883	108.837
ENSG00000135951	TSGA10	53.7294	2.10054	0.434627	4.83296	4.28869	1.35e-06	6.62e-06	80705	protein_coding	HGNC Symbol	19	testis specific 10 [Source:HGNC Symbol;Acc:HGNC:14927]	0.507409	0.638421	0.414565	0.545396	1.04567	0.408799	0.870201	1.37606	1.37479
ENSG00000079385	CEACAM1	322.444	2.11951	0.286649	7.3941	4.34546	1.42e-13	1.82e-12	634	protein_coding	HGNC Symbol	14	carcinoembryonic antigen related cell adhesion molecule 1 [Source:HGNC Symbol;Acc:HGNC:1814]	2.10652	3.5195	3.66631	23.1092	29.5037	26.388	10.4029	5.44567	7.12853
ENSG00000155980	KIF5A	30.3491	2.13985	0.521915	4.09999	4.40715	4.13e-05	0.000152855	3798	protein_coding	HGNC Symbol	3	kinesin family member 5A [Source:HGNC Symbol;Acc:HGNC:6323]	0.276769	0.261916	0.336834	0.296072	0.10589	0.16352	1.22619	0.644112	0.356426
ENSG00000163071	SPATA18	1253.75	2.14192	0.169946	12.6035	4.4135	2.02e-36	1.93e-34	132671	protein_coding	HGNC Symbol	10	spermatogenesis associated 18 [Source:HGNC Symbol;Acc:HGNC:29579]	14.3305	10.4112	11.2062	21.0056	22.5414	13.8174	31.8019	27.1991	28.565
ENSG00000158050	DUSP2	17.124	2.14296	0.634274	3.3786	4.41667	0.000728558	0.00210322	1844	protein_coding	HGNC Symbol	2	dual specificity phosphatase 2 [Source:HGNC Symbol;Acc:HGNC:3068]	0.0922563	0.180068	0.207283	0.62331	0.370617	0.654079	0.355991	0.468445	0.356426
ENSG00000080709	KCNN2	9.06317	2.14707	0.805806	2.6645	4.42927	0.00771029	0.0175414	3781	protein_coding	HGNC Symbol	10	potassium calcium-activated channel subfamily N member 2 [Source:HGNC Symbol;Acc:HGNC:6291]	0.0922563	0.0654791	0.103641	0.062331	0.0397089	0.12264	0.336214	0.117111	0.203672
ENSG00000174945	AMZ1	13.3743	2.14783	0.672208	3.19519	4.43161	0.00139741	0.00380914	155185	protein_coding	HGNC Symbol	6	archaelysin family metallopeptidase 1 [Source:HGNC Symbol;Acc:HGNC:22231]	0.138384	0.0818489	0.155462	0.124662	0.317671	0	0.29666	0.351334	0.280049
ENSG00000166197	NOLC1	8591.31	2.15249	0.116603	18.46	4.44596	4.33e-76	1.78e-73	9221	protein_coding	HGNC Symbol	9	nucleolar and coiled-body phosphoprotein 1 [Source:HGNC Symbol;Acc:HGNC:15608]	80.2629	80.6866	83.1074	80.1109	61.112	54.7587	247.968	184.04	176.024
ENSG00000183048	SLC25A10	514.972	2.15419	0.436608	4.93392	4.45118	8.06e-07	4.11e-06	1468	protein_coding	HGNC Symbol	8	solute carrier family 25 member 10 [Source:HGNC Symbol;Acc:HGNC:10980]	3.78251	4.9273	5.82982	6.13961	8.90803	10.8127	5.41898	10.5693	18.1523
ENSG00000080298	RFX3	1208.77	2.15579	0.272705	7.90519	4.45611	2.68e-15	4.19e-14	5991	protein_coding	HGNC Symbol	12	regulatory factor X3 [Source:HGNC Symbol;Acc:HGNC:9984]	10.8247	12.5229	10.8694	9.4899	14.1099	8.46214	20.4695	30.5367	31.1109
ENSG00000177025	C19orf18	16.2176	2.15667	0.699044	3.08518	4.45885	0.00203432	0.00532606	147685	protein_coding	HGNC Symbol	1	chromosome 19 open reading frame 18 [Source:HGNC Symbol;Acc:HGNC:28642]	0.215265	0.0491093	0.194327	0.467483	0.264726	0.16352	0.454878	0.439167	0.25459
ENSG00000164045	CDC25A	1282.98	2.15668	0.160476	13.4392	4.45886	3.56e-41	4.72e-39	993	protein_coding	HGNC Symbol	5	cell division cycle 25A [Source:HGNC Symbol;Acc:HGNC:1725]	12.8236	11.7862	11.7892	12.1701	9.75516	8.25774	36.1529	31.1809	23.3459
ENSG00000095574	IKZF5	1262.13	2.15762	0.277169	7.78447	4.46177	7e-15	1.06e-13	64376	protein_coding	HGNC Symbol	5	IKAROS family zinc finger 5 [Source:HGNC Symbol;Acc:HGNC:14283]	13.6539	10.935	11.2321	11.8273	12.1112	8.68698	20.8651	32.9375	31.8492
ENSG00000065361	ERBB3	12.0631	2.16675	0.715636	3.02772	4.4901	0.00246406	0.00634742	2065	protein_coding	HGNC Symbol	23	erb-b2 receptor tyrosine kinase 3 [Source:HGNC Symbol;Acc:HGNC:3431]	0.0615042	0.130958	0.142507	0.296072	0.172072	0.24528	0.29666	0.292778	0.25459
ENSG00000177302	TOP3A	2832.27	2.18402	0.188659	11.5766	4.54418	5.42e-31	3.56e-29	7156	protein_coding	HGNC Symbol	20	DNA topoisomerase III alpha [Source:HGNC Symbol;Acc:HGNC:11992]	30.0755	23.1796	25.9621	31.7265	26.777	22.5862	63.1292	69.6519	63.9531
ENSG00000178773	CPNE7	149.797	2.18835	0.449603	4.86729	4.55783	1.13e-06	5.63e-06	27132	protein_coding	HGNC Symbol	9	copine 7 [Source:HGNC Symbol;Acc:HGNC:2320]	0.799554	1.37506	1.94327	1.23104	1.16479	0.797158	2.11617	4.65517	3.36059
ENSG00000154640	BTG3	1716.24	2.18839	0.153532	14.2537	4.55797	4.25e-46	7.43e-44	10950	protein_coding	HGNC Symbol	6	BTG anti-proliferation factor 3 [Source:HGNC Symbol;Acc:HGNC:1132]	18.5743	14.2417	15.1316	22.4236	14.3879	12.2435	52.3703	35.0162	35.2353
ENSG00000005961	ITGA2B	25.8267	2.19492	0.582401	3.76874	4.57863	0.000164074	0.000539878	3674	protein_coding	HGNC Symbol	10	integrin subunit alpha 2b [Source:HGNC Symbol;Acc:HGNC:6138]	0.138384	0.311026	0.259103	0.358403	0.145599	0.2044	0.672428	0.819778	0.330967
ENSG00000163082	SGPP2	12.6991	2.21749	0.971607	2.28229	4.65083	0.0224723	0.04483	130367	protein_coding	HGNC Symbol	1	sphingosine-1-phosphate phosphatase 2 [Source:HGNC Symbol;Acc:HGNC:19953]	0.0461281	0.163698	0.142507	0.124662	0.145599	0	0.791092	0.0585556	0.152754
ENSG00000130803	ZNF317	3444.12	2.21794	0.227606	9.74468	4.6523	1.94e-22	6.16e-21	57693	protein_coding	HGNC Symbol	6	zinc finger protein 317 [Source:HGNC Symbol;Acc:HGNC:13507]	32.9662	31.6755	29.6932	42.1669	39.828	33.5215	65.7793	86.6916	85.0077
ENSG00000163348	PYGO2	3011.79	2.22175	0.297435	7.46969	4.66459	8.04e-14	1.07e-12	90780	protein_coding	HGNC Symbol	3	pygopus family PHD finger 2 [Source:HGNC Symbol;Acc:HGNC:30257]	32.9047	24.4073	25.2367	20.8653	23.2694	13.9196	46.4173	78.8158	79.8395
ENSG00000179988	PSTK	217.018	2.22545	0.310475	7.16789	4.67657	7.62e-13	8.8e-12	118672	protein_coding	HGNC Symbol	9	phosphoseryl-tRNA kinase [Source:HGNC Symbol;Acc:HGNC:28578]	1.84513	2.17718	1.91736	1.34012	1.65454	0.940238	8.91956	3.57189	3.61518
ENSG00000053702	NRIP2	63.8631	2.23501	0.403279	5.54209	4.70767	2.99e-08	1.9e-07	83714	protein_coding	HGNC Symbol	3	nuclear receptor interacting protein 2 [Source:HGNC Symbol;Acc:HGNC:23078]	0.599666	0.654791	0.466386	0.888217	0.688288	0.694959	1.08775	1.66883	1.62938
ENSG00000010818	HIVEP2	1606.36	2.23909	0.154508	14.4918	4.721	1.37e-47	2.61e-45	3097	protein_coding	HGNC Symbol	5	human immunodeficiency virus type I enhancer binding protein 2 [Source:HGNC Symbol;Acc:HGNC:4921]	17.3134	13.4232	12.8645	44.2083	37.1278	28.0027	44.3407	35.3676	34.5988
ENSG00000167994	RAB3IL1	190.328	2.23934	0.263192	8.50839	4.7218	1.76e-17	3.42e-16	5866	protein_coding	HGNC Symbol	6	RAB3A interacting protein like 1 [Source:HGNC Symbol;Acc:HGNC:9780]	2.2449	1.35869	1.55462	5.71887	3.33555	4.00623	4.529	4.62589	4.2262
ENSG00000165494	PCF11	3246.6	2.2434	0.291894	7.68565	4.73511	1.52e-14	2.19e-13	51585	protein_coding	HGNC Symbol	7	PCF11, cleavage and polyadenylation factor subunit [Source:HGNC Symbol;Acc:HGNC:30097]	34.9805	27.2557	25.6512	44.8783	45.3476	28.7999	51.243	87.1307	83.5565
ENSG00000008300	CELSR3	81.8082	2.24742	0.365615	6.14696	4.74834	7.9e-10	6.19e-09	1951	protein_coding	HGNC Symbol	4	cadherin EGF LAG seven-pass G-type receptor 3 [Source:HGNC Symbol;Acc:HGNC:3230]	0.753426	0.589312	0.842086	0.638893	0.701524	0.838038	1.81951	2.51789	1.40025
ENSG00000008405	CRY1	2340.3	2.24843	0.199358	11.2784	4.75165	1.68e-29	9.85e-28	1407	protein_coding	HGNC Symbol	5	cryptochrome circadian regulator 1 [Source:HGNC Symbol;Acc:HGNC:2384]	23.4792	19.9711	19.6141	20.6783	17.7102	12.6115	49.819	57.2088	56.1372
ENSG00000164841	TMEM74	11.894	2.25665	0.794107	2.84175	4.7788	0.00448672	0.0108508	157753	protein_coding	HGNC Symbol	2	transmembrane protein 74 [Source:HGNC Symbol;Acc:HGNC:26409]	0.15376	0.0327396	0.129552	0.155828	0	0.0408799	0.237328	0.234222	0.356426
ENSG00000163638	ADAMTS9	4660.59	2.25919	0.24844	9.0935	4.78722	9.59e-20	2.47e-18	56999	protein_coding	HGNC Symbol	10	ADAM metallopeptidase with thrombospondin type 1 motif 9 [Source:HGNC Symbol;Acc:HGNC:13202]	29.276	46.8176	47.8564	155.983	184.752	143.468	158.456	83.3539	97.6099
ENSG00000179094	AC129492.1	3019.33	2.25926	0.267171	8.45621	4.78744	2.76e-17	5.23e-16	5187	protein_coding	Clone-based (Ensembl) gene	19	period circadian regulator 1 [Source:NCBI gene;Acc:5187]	31.8592	24.4073	24.7055	68.1434	63.1637	44.1503	52.0539	79.3428	76.428
ENSG00000163374	YY1AP1	4929.99	2.26531	0.287676	7.87452	4.80757	3.42e-15	5.27e-14	55249	protein_coding	HGNC Symbol	25	YY1 associated protein 1 [Source:HGNC Symbol;Acc:HGNC:30935]	48.3577	40.6134	42.6095	38.7387	37.3926	27.2669	77.0524	136.171	124.469
ENSG00000088356	PDRG1	1691.29	2.26591	0.168453	13.4513	4.80958	3.02e-41	4.07e-39	81572	protein_coding	HGNC Symbol	1	p53 and DNA damage regulated 1 [Source:HGNC Symbol;Acc:HGNC:16119]	15.2069	14.9292	14.8855	12.2013	7.71677	6.78607	39.4557	40.1399	39.3851
ENSG00000117000	RLF	2326.31	2.26638	0.275493	8.22662	4.81115	1.93e-16	3.38e-15	6018	protein_coding	HGNC Symbol	1	rearranged L-myc fusion [Source:HGNC Symbol;Acc:HGNC:10025]	15.6067	23.4743	22.5549	20.4757	25.7711	16.4133	43.4112	61.337	56.3154
ENSG00000110721	CHKA	1084.83	2.27084	0.15803	14.3697	4.82605	8.02e-47	1.43e-44	1119	protein_coding	HGNC Symbol	8	choline kinase alpha [Source:HGNC Symbol;Acc:HGNC:1937]	10.0098	9.21619	9.57386	12.4506	12.1245	9.40238	26.9762	26.4086	23.3968
ENSG00000154099	DNAAF1	13.899	2.28165	0.75318	3.02935	4.86233	0.00245079	0.00631972	123872	protein_coding	HGNC Symbol	10	dynein axonemal assembly factor 1 [Source:HGNC Symbol;Acc:HGNC:30539]	0.0768802	0.0982187	0.181372	0.062331	0.10589	0.0613199	0.237328	0.497723	0.229131
ENSG00000065491	TBC1D22B	2544.35	2.2845	0.220276	10.3711	4.87195	3.36e-25	1.44e-23	55633	protein_coding	HGNC Symbol	1	TBC1 domain family member 22B [Source:HGNC Symbol;Acc:HGNC:21602]	26.5852	19.9384	20.7283	19.1824	17.0484	12.8772	52.2714	63.767	61.6109
ENSG00000175518	UBQLNL	18.3135	2.3011	0.677388	3.39702	4.92834	0.00068123	0.00198368	143630	protein_coding	HGNC Symbol	1	ubiquilin like [Source:HGNC Symbol;Acc:HGNC:28294]	0.123008	0.163698	0.181372	0.17141	0.423562	0.24528	0.21755	0.468445	0.560099
ENSG00000109670	FBXW7	1845.07	2.31162	0.232631	9.93686	4.9644	2.88e-23	9.97e-22	55294	protein_coding	HGNC Symbol	17	F-box and WD repeat domain containing 7 [Source:HGNC Symbol;Acc:HGNC:16712]	17.0367	15.5349	15.326	26.2881	27.836	18.9683	35.8563	43.214	49.5942
ENSG00000265107	GJA5	249.395	2.31554	0.90593	2.55598	4.97791	0.0105889	0.0232283	2702	protein_coding	HGNC Symbol	3	gap junction protein alpha 5 [Source:HGNC Symbol;Acc:HGNC:4279]	0.430529	2.94656	2.97969	8.05628	15.8836	4.53767	3.48081	4.45023	9.11433
ENSG00000111011	RSRC2	4842.5	2.3213	0.22452	10.339	4.99784	4.7e-25	1.98e-23	65117	protein_coding	HGNC Symbol	20	arginine and serine rich coiled-coil 2 [Source:HGNC Symbol;Acc:HGNC:30559]	47.3121	38.5181	39.3837	49.522	40.4766	27.2465	95.5046	123.582	119.403
ENSG00000119121	TRPM6	7.0979	2.32297	0.981594	2.36653	5.0036	0.017956	0.036979	140803	protein_coding	HGNC Symbol	5	transient receptor potential cation channel subfamily M member 6 [Source:HGNC Symbol;Acc:HGNC:17995]	0.0307521	0.0982187	0.0518206	0.249324	0.211781	0.18396	0.118664	0.117111	0.25459
ENSG00000040731	CDH10	12.42	2.32855	0.718148	3.24243	5.02299	0.00118513	0.00327175	1008	protein_coding	HGNC Symbol	4	cadherin 10 [Source:HGNC Symbol;Acc:HGNC:1749]	0.0615042	0.0982187	0.155462	0	0.132363	0	0.355991	0.234222	0.305508
ENSG00000166478	ZNF143	1341.95	2.33119	0.181986	12.8098	5.03221	1.45e-37	1.56e-35	7702	protein_coding	HGNC Symbol	18	zinc finger protein 143 [Source:HGNC Symbol;Acc:HGNC:12928]	11.409	12.2446	10.7398	12.1078	10.3773	9.44326	31.0701	32.3227	31.6201
ENSG00000047634	SCML1	929.677	2.33226	0.23644	9.86406	5.03594	5.96e-23	2e-21	6322	protein_coding	HGNC Symbol	7	Scm polycomb group protein like 1 [Source:HGNC Symbol;Acc:HGNC:10580]	8.31844	7.67743	7.82492	13.1674	11.9789	8.9527	18.0171	24.0956	22.8877
ENSG00000167377	ZNF23	43.7316	2.34385	0.522142	4.48892	5.07656	7.16e-06	3.11e-05	7571	protein_coding	HGNC Symbol	12	zinc finger protein 23 [Source:HGNC Symbol;Acc:HGNC:13023]	0.384401	0.196437	0.518206	0.342821	0.450034	0.388359	0.692206	1.14183	1.19657
ENSG00000177453	NIM1K	22.0736	2.34653	0.602466	3.89487	5.086	9.83e-05	0.000339188	167359	protein_coding	HGNC Symbol	5	NIM1 serine/threonine protein kinase [Source:HGNC Symbol;Acc:HGNC:28646]	0.246017	0.196437	0.116596	0.155828	0.277962	0.0408799	0.355991	0.614834	0.560099
ENSG00000156113	KCNMA1	149.384	2.34749	0.374081	6.27534	5.08937	3.49e-10	2.88e-09	3778	protein_coding	HGNC Symbol	93	potassium calcium-activated channel subfamily M alpha 1 [Source:HGNC Symbol;Acc:HGNC:6284]	1.29159	1.09678	1.3862	0.919382	1.33687	1.30816	2.1755	4.09889	4.02253
ENSG00000049246	PER3	546.167	2.34832	0.333102	7.04987	5.09232	1.79e-12	1.98e-11	8863	protein_coding	HGNC Symbol	9	period circadian regulator 3 [Source:HGNC Symbol;Acc:HGNC:8847]	3.78251	5.50025	4.52135	2.47766	2.68697	1.79872	8.30647	14.961	14.4353
ENSG00000075073	TACR2	41.2008	2.35772	0.451717	5.21947	5.12561	1.79e-07	1.02e-06	6865	protein_coding	HGNC Symbol	3	tachykinin receptor 2 [Source:HGNC Symbol;Acc:HGNC:11527]	0.307521	0.343765	0.3757	0.592145	0.489743	0.531439	0.73176	1.02472	1.1202
ENSG00000121039	RDH10	920.22	2.36187	0.176041	13.4166	5.14035	4.84e-41	6.3e-39	157506	protein_coding	HGNC Symbol	5	retinol dehydrogenase 10 [Source:HGNC Symbol;Acc:HGNC:19975]	7.79565	7.12085	8.23948	29.7007	20.9266	18.4777	22.5066	22.9831	20.189
ENSG00000184985	SORCS2	14.6391	2.36334	0.648319	3.64534	5.14562	0.000267036	0.000839649	57537	protein_coding	HGNC Symbol	4	sortilin related VPS10 domain containing receptor 2 [Source:HGNC Symbol;Acc:HGNC:16698]	0.0768802	0.147328	0.142507	1.34012	1.53541	1.30816	0.435101	0.322056	0.305508
ENSG00000182759	MAFA	9.27564	2.37115	1.02119	2.32194	5.17353	0.0202361	0.0409257	389692	protein_coding	HGNC Symbol	2	MAF bZIP transcription factor A [Source:HGNC Symbol;Acc:HGNC:23145]	0.0922563	0.0982187	0.0388655	0.233741	0.145599	0.12264	0.0395546	0.351334	0.229131
ENSG00000110723	EXPH5	11.4717	2.37558	0.723143	3.28508	5.18946	0.00101953	0.00285585	23086	protein_coding	HGNC Symbol	6	exophilin 5 [Source:HGNC Symbol;Acc:HGNC:30578]	0.0922563	0.114588	0.077731	0.186993	0.238254	0.14308	0.237328	0.292778	0.280049
ENSG00000087494	PTHLH	223.04	2.3778	0.32912	7.22472	5.19742	5.02e-13	5.92e-12	5744	protein_coding	HGNC Symbol	9	parathyroid hormone like hormone [Source:HGNC Symbol;Acc:HGNC:9607]	1.29159	2.12807	2.1376	6.3266	4.77831	5.29395	8.89979	4.01106	3.84431
ENSG00000178184	PARD6G	333.759	2.38399	0.330994	7.20252	5.21978	5.91e-13	6.92e-12	84552	protein_coding	HGNC Symbol	3	par-6 family cell polarity regulator gamma [Source:HGNC Symbol;Acc:HGNC:16076]	1.69136	3.40491	3.13515	4.58133	4.22238	2.39148	6.76384	7.87573	8.8852
ENSG00000155918	RAET1L	7.66523	2.38642	0.854994	2.79116	5.2286	0.00525195	0.0124666	154064	protein_coding	HGNC Symbol	2	retinoic acid early transcript 1L [Source:HGNC Symbol;Acc:HGNC:16798]	0.0615042	0.0491093	0.077731	0.405152	0.529452	0.265719	0.197773	0.175667	0.178213
ENSG00000059728	MXD1	1098.08	2.39207	0.195953	12.2074	5.24911	2.84e-34	2.26e-32	4084	protein_coding	HGNC Symbol	6	MAX dimerization protein 1 [Source:HGNC Symbol;Acc:HGNC:6761]	11.2706	7.85749	8.16175	48.3377	46.6183	33.3171	26.7191	25.9401	25.8918
ENSG00000178233	TMEM151B	15.3792	2.39385	0.648232	3.6929	5.2556	0.000221713	0.000711024	441151	protein_coding	HGNC Symbol	2	transmembrane protein 151B [Source:HGNC Symbol;Acc:HGNC:21315]	0.0922563	0.114588	0.168417	0.140245	0.0529452	0.0408799	0.375769	0.292778	0.432804
ENSG00000111679	PTPN6	41.9374	2.39682	0.623981	3.84117	5.2664	0.000122448	0.000415392	5777	protein_coding	HGNC Symbol	23	protein tyrosine phosphatase, non-receptor type 6 [Source:HGNC Symbol;Acc:HGNC:9658]	0.707298	0.147328	0.194327	1.16871	1.29716	1.41036	0.771315	1.25895	0.916525
ENSG00000091106	NLRC4	15.7592	2.39718	0.816206	2.93697	5.26771	0.00331431	0.00829272	58484	protein_coding	HGNC Symbol	5	NLR family CARD domain containing 4 [Source:HGNC Symbol;Acc:HGNC:16412]	0.292145	0.0654791	0.0388655	0.109079	0.277962	0.0613199	0.355991	0.409889	0.356426
ENSG00000110693	SOX6	15.9671	2.40402	0.753008	3.19256	5.29276	0.00141018	0.00383505	55553	protein_coding	HGNC Symbol	17	SRY-box 6 [Source:HGNC Symbol;Acc:HGNC:16421]	0.138384	0.212807	0.0518206	0.28049	0.344144	0.286159	0.73176	0.234222	0.25459
ENSG00000121577	POPDC2	21.7607	2.43142	0.832797	2.91958	5.39424	0.00350499	0.00870207	64091	protein_coding	HGNC Symbol	9	popeye domain containing 2 [Source:HGNC Symbol;Acc:HGNC:17648]	0.246017	0.229177	0.0518206	0.109079	0.10589	0.286159	0.138441	0.644112	0.687394
ENSG00000054967	RELT	935.509	2.43172	0.25442	9.55791	5.39537	1.2e-21	3.52e-20	84957	protein_coding	HGNC Symbol	7	RELT, TNF receptor [Source:HGNC Symbol;Acc:HGNC:13764]	6.07354	7.89023	8.56336	11.1261	8.20651	6.64299	19.006	23.6565	23.626
ENSG00000118997	DNAH7	9.55497	2.44305	0.889704	2.74591	5.43791	0.00603424	0.0141074	56171	protein_coding	HGNC Symbol	8	dynein axonemal heavy chain 7 [Source:HGNC Symbol;Acc:HGNC:18661]	0.0307521	0.130958	0.0647758	0.0934965	0.172072	0.0817598	0.158218	0.204945	0.305508
ENSG00000158079	PTPDC1	734.261	2.44734	0.194662	12.5723	5.4541	3e-36	2.8e-34	138639	protein_coding	HGNC Symbol	5	protein tyrosine phosphatase domain containing 1 [Source:HGNC Symbol;Acc:HGNC:30184]	6.05816	5.81127	5.778	6.685	7.04172	5.78451	26.2445	14.434	14.1298
ENSG00000176406	RIMS2	114.301	2.45005	0.362955	6.7503	5.46436	1.48e-11	1.44e-10	9699	protein_coding	HGNC Symbol	14	regulating synaptic membrane exocytosis 2 [Source:HGNC Symbol;Acc:HGNC:17283]	1.27621	0.75301	0.712534	0.747972	0.622106	0.388359	2.15573	3.07417	2.85141
ENSG00000157680	DGKI	24.5436	2.4516	0.612365	4.00349	5.47022	6.24e-05	0.000222677	9162	protein_coding	HGNC Symbol	13	diacylglycerol kinase iota [Source:HGNC Symbol;Acc:HGNC:2855]	0.138384	0.180068	0.272058	0.420734	1.04567	0.22484	1.10753	0.292778	0.483722
ENSG00000097096	SYDE2	159.225	2.46165	0.299532	8.21834	5.50848	2.06e-16	3.6e-15	84144	protein_coding	HGNC Symbol	2	synapse defective Rho GTPase homolog 2 [Source:HGNC Symbol;Acc:HGNC:25841]	1.35309	1.21136	1.20483	1.8076	1.28392	0.694959	3.20392	4.68445	3.43697
ENSG00000070182	SPTB	64.3294	2.46895	0.462897	5.33369	5.53639	9.62e-08	5.66e-07	6710	protein_coding	HGNC Symbol	9	spectrin beta, erythrocytic [Source:HGNC Symbol;Acc:HGNC:11274]	0.276769	0.605682	0.621848	0.358403	1.74719	0.981118	1.3053	1.22967	2.03672
ENSG00000085563	ABCB1	294.911	2.47411	0.2871	8.6176	5.55626	6.84e-18	1.38e-16	5243	protein_coding	HGNC Symbol	11	ATP binding cassette subfamily B member 1 [Source:HGNC Symbol;Acc:HGNC:40]	3.24435	2.24266	1.54166	10.5495	7.8756	6.02979	10.1062	6.20689	5.6519
ENSG00000131620	ANO1	28.2788	2.47822	0.539731	4.59158	5.57209	4.4e-06	1.96e-05	55107	protein_coding	HGNC Symbol	10	anoctamin 1 [Source:HGNC Symbol;Acc:HGNC:21625]	0.184513	0.294656	0.181372	0.747972	0.529452	1.08332	0.51421	0.644112	0.840148
ENSG00000156206	CFAP161	17.3823	2.48917	0.63595	3.9141	5.61456	9.07e-05	0.000315118	161502	protein_coding	HGNC Symbol	3	cilia and flagella associated protein 161 [Source:HGNC Symbol;Acc:HGNC:26782]	0.138384	0.163698	0.103641	1.37128	1.38981	0.613199	0.355991	0.322056	0.560099
ENSG00000117595	IRF6	1083.27	2.49121	0.316028	7.88287	5.62248	3.2e-15	4.95e-14	3664	protein_coding	HGNC Symbol	5	interferon regulatory factor 6 [Source:HGNC Symbol;Acc:HGNC:6121]	13.8999	6.4988	5.22093	5.53188	4.47387	4.00623	33.0874	23.4515	23.3205
ENSG00000176749	CDK5R1	465.401	2.49528	0.2714	9.19412	5.63837	3.78e-20	1.02e-18	8851	protein_coding	HGNC Symbol	3	cyclin dependent kinase 5 regulatory subunit 1 [Source:HGNC Symbol;Acc:HGNC:1775]	2.5678	3.79779	4.40476	5.4228	5.00332	2.77983	10.6204	12.0625	10.7946
ENSG00000184368	MAP7D2	60.6689	2.49576	0.345125	7.23147	5.64025	4.78e-13	5.65e-12	256714	protein_coding	HGNC Symbol	5	MAP7 domain containing 2 [Source:HGNC Symbol;Acc:HGNC:25899]	0.399777	0.458354	0.544117	0.155828	0.277962	0.286159	1.58218	1.40533	1.42571
ENSG00000120217	CD274	2126.1	2.49791	0.33587	7.43712	5.64865	1.03e-13	1.35e-12	29126	protein_coding	HGNC Symbol	5	CD274 molecule [Source:HGNC Symbol;Acc:HGNC:17635]	22.4336	14.0616	13.3438	15.7542	12.7069	9.34106	98.2932	35.3676	31.2128
ENSG00000164330	EBF1	11.9723	2.50513	1.03565	2.4189	5.67702	0.0155677	0.0326001	1879	protein_coding	HGNC Symbol	11	EBF transcription factor 1 [Source:HGNC Symbol;Acc:HGNC:3126]	0	0.196437	0.077731	0.560979	1.0192	0.654079	0.276882	0.175667	0.407345
ENSG00000122176	FMOD	43.0274	2.50522	0.589018	4.25322	5.67738	2.11e-05	8.34e-05	2331	protein_coding	HGNC Symbol	4	fibromodulin [Source:HGNC Symbol;Acc:HGNC:3774]	0.461281	0.311026	0.246148	0.514231	0.50298	0.367919	2.33372	0.468445	0.611017
ENSG00000084674	APOB	21.6196	2.51763	0.594789	4.23281	5.72639	2.31e-05	9.06e-05	338	protein_coding	HGNC Symbol	2	apolipoprotein B [Source:HGNC Symbol;Acc:HGNC:603]	0.107632	0.212807	0.181372	0.483065	1.0192	0.572319	0.889979	0.351334	0.407345
ENSG00000163602	RYBP	2344.79	2.52469	0.244991	10.3053	5.75451	6.67e-25	2.78e-23	23429	protein_coding	HGNC Symbol	1	RING1 and YY1 binding protein [Source:HGNC Symbol;Acc:HGNC:10480]	18.0053	19.0544	16.6344	32.8484	34.5997	22.6475	44.4594	61.8933	60.5416
ENSG00000143398	PIP5K1A	9500.6	2.5256	0.195739	12.9029	5.75811	4.34e-38	4.95e-36	8394	protein_coding	HGNC Symbol	17	phosphatidylinositol-4-phosphate 5-kinase type 1 alpha [Source:HGNC Symbol;Acc:HGNC:8994]	80.0784	67.7709	70.0745	103.282	100.98	72.3983	207.523	235.833	239.417
ENSG00000065320	NTN1	90.2602	2.53223	0.465421	5.44073	5.78466	5.31e-08	3.27e-07	9423	protein_coding	HGNC Symbol	2	netrin 1 [Source:HGNC Symbol;Acc:HGNC:8029]	0.276769	1.06404	0.699579	3.35029	3.40173	1.55344	2.49194	1.69811	2.41861
ENSG00000177098	SCN4B	37.9196	2.54548	0.430171	5.91736	5.83802	3.27e-09	2.38e-08	6330	protein_coding	HGNC Symbol	6	sodium voltage-gated channel beta subunit 4 [Source:HGNC Symbol;Acc:HGNC:10592]	0.307521	0.245547	0.310924	2.353	1.83985	0.878918	1.38441	0.790501	0.687394
ENSG00000175206	NPPA	11.9106	2.55059	1.05829	2.4101	5.85873	0.015948	0.0333285	4878	protein_coding	HGNC Symbol	3	natriuretic peptide A [Source:HGNC Symbol;Acc:HGNC:7939]	0.0768802	0.0818489	0.103641	0.0934965	0.132363	0.0408799	0.0197773	0.556278	0.229131
ENSG00000174500	GCSAM	5.89231	2.55515	1.05327	2.42593	5.87728	0.0152693	0.0320241	257144	protein_coding	HGNC Symbol	7	germinal center associated signaling and motility [Source:HGNC Symbol;Acc:HGNC:20253]	0.0615042	0.0327396	0.0388655	0.28049	0.132363	0.0817598	0.138441	0.0585556	0.229131
ENSG00000183598	HIST2H3D	11.3759	2.56587	0.84235	3.04608	5.92111	0.00231843	0.00601619	653604	protein_coding	HGNC Symbol	1	histone cluster 2 H3 family member d [Source:HGNC Symbol;Acc:HGNC:25311]	0.123008	0.0163698	0.116596	0.0155828	0.0794178	0.02044	0.435101	0.175667	0.25459
ENSG00000143367	TUFT1	592.279	2.5707	0.176574	14.5588	5.94097	5.14e-48	1e-45	7286	protein_coding	HGNC Symbol	7	tuftelin 1 [Source:HGNC Symbol;Acc:HGNC:12422]	5.1356	3.94512	4.14565	4.81507	4.12973	4.47635	16.0592	14.756	12.7041
ENSG00000112249	ASCC3	12014.7	2.57333	0.252929	10.1741	5.95182	2.59e-24	1.01e-22	10973	protein_coding	HGNC Symbol	7	activating signal cointegrator 1 complex subunit 3 [Source:HGNC Symbol;Acc:HGNC:18697]	73.3284	100.838	92.3444	97.0026	134.971	91.244	235.389	317.606	307.902
ENSG00000130592	LSP1	5.30849	2.58071	1.06023	2.4341	5.98233	0.0149287	0.0314142	4046	protein_coding	HGNC Symbol	17	lymphocyte specific protein 1 [Source:HGNC Symbol;Acc:HGNC:6707]	0.0307521	0.0327396	0.0518206	0.358403	0.172072	0.16352	0.138441	0.175667	0.0763771
ENSG00000130477	UNC13A	11.7217	2.58241	0.815956	3.16489	5.98941	0.00155141	0.00417214	23025	protein_coding	HGNC Symbol	7	unc-13 homolog A [Source:HGNC Symbol;Acc:HGNC:23150]	0.0307521	0.147328	0.077731	2.08809	0.383853	0.510999	0.237328	0.351334	0.25459
ENSG00000064270	ATP2C2	13.7577	2.60402	0.697904	3.73121	6.0798	0.000190565	0.000618865	9914	protein_coding	HGNC Symbol	15	ATPase secretory pathway Ca2+ transporting 2 [Source:HGNC Symbol;Acc:HGNC:29103]	0.123008	0.0982187	0.077731	0.498648	0.529452	0.286159	0.257105	0.322056	0.407345
ENSG00000009413	REV3L	7227.3	2.60828	0.23999	10.8683	6.09775	1.63e-27	8.49e-26	5980	protein_coding	HGNC Symbol	14	REV3 like, DNA directed polymerase zeta catalytic subunit [Source:HGNC Symbol;Acc:HGNC:9968]	53.3549	56.9832	47.2345	65.7748	88.4582	48.2792	141.151	201.461	176.94
ENSG00000108506	INTS2	1460.24	2.60926	0.280818	9.29163	6.10191	1.52e-20	4.22e-19	57508	protein_coding	HGNC Symbol	10	integrator complex subunit 2 [Source:HGNC Symbol;Acc:HGNC:29241]	10.3942	11.0332	10.3512	10.8456	13.1437	8.9527	25.0183	42.6578	36.4828
ENSG00000156959	LHFPL4	8.16715	2.60964	0.997056	2.61734	6.1035	0.00886171	0.0198152	375323	protein_coding	HGNC Symbol	3	LHFPL tetraspan subfamily member 4 [Source:HGNC Symbol;Acc:HGNC:29568]	0.0922563	0.0327396	0.0518206	0.218159	0.450034	0.12264	0.0988865	0.117111	0.356426
ENSG00000164440	TXLNB	24.2645	2.6201	0.524052	4.99969	6.14793	5.74e-07	3e-06	167838	protein_coding	HGNC Symbol	2	taxilin beta [Source:HGNC Symbol;Acc:HGNC:21617]	0.199889	0.114588	0.207283	0.670058	0.397089	0.12264	0.652651	0.527	0.611017
ENSG00000108679	LGALS3BP	90.8245	2.62283	0.471483	5.56293	6.15956	2.65e-08	1.71e-07	3959	protein_coding	HGNC Symbol	19	galectin 3 binding protein [Source:HGNC Symbol;Acc:HGNC:6564]	0.968691	0.507463	0.492296	1.58944	1.54865	1.47168	1.20642	2.57645	2.62228
ENSG00000121895	TMEM156	136.969	2.62556	0.380987	6.89148	6.17126	5.52e-12	5.73e-11	80008	protein_coding	HGNC Symbol	4	transmembrane protein 156 [Source:HGNC Symbol;Acc:HGNC:26260]	0.999443	0.834859	1.10119	2.39974	1.31039	1.51256	2.25461	4.59661	2.92779
ENSG00000086730	LAT2	97.4451	2.62693	0.371321	7.07456	6.17712	1.5e-12	1.67e-11	7462	protein_coding	HGNC Symbol	11	linker for activation of T cells family member 2 [Source:HGNC Symbol;Acc:HGNC:12749]	0.722674	0.556573	0.80322	1.12196	0.873596	0.551879	1.7404	2.75211	2.49499
ENSG00000155966	AFF2	40.2584	2.62909	0.641829	4.09625	6.18636	4.2e-05	0.000155275	2334	protein_coding	HGNC Symbol	5	AF4/FMR2 family member 2 [Source:HGNC Symbol;Acc:HGNC:3776]	0.138384	0.523833	0.194327	1.07521	1.16479	0.613199	0.553765	1.37606	0.916525
ENSG00000165917	RAPSN	23.6351	2.64259	0.61634	4.28755	6.24452	1.81e-05	7.26e-05	5913	protein_coding	HGNC Symbol	5	receptor associated protein of the synapse [Source:HGNC Symbol;Acc:HGNC:9863]	0.215265	0.114588	0.168417	0.296072	0.582397	0.408799	0.336214	0.731945	0.611017
ENSG00000135604	STX11	2094.29	2.64658	0.151759	17.4394	6.26183	4.15e-68	1.31e-65	8676	protein_coding	HGNC Symbol	1	syntaxin 11 [Source:HGNC Symbol;Acc:HGNC:11429]	14.0383	14.4873	16.0385	26.4284	21.7737	18.1302	58.1651	45.5563	51.4272
ENSG00000083799	CYLD	2768.59	2.64867	0.234398	11.2999	6.2709	1.31e-29	7.82e-28	1540	protein_coding	HGNC Symbol	16	CYLD lysine 63 deubiquitinase [Source:HGNC Symbol;Acc:HGNC:2584]	25.1552	17.221	16.8288	37.009	33.9776	25.4273	59.8857	73.8386	67.4155
ENSG00000174808	BTC	7.14515	2.65634	1.16201	2.28599	6.3043	0.0222551	0.0444182	685	protein_coding	HGNC Symbol	2	betacellulin [Source:HGNC Symbol;Acc:HGNC:1121]	0.123008	0.0327396	0	0.124662	0.0264726	0.0817598	0.197773	0.204945	0.127295
ENSG00000090382	LYZ	10.322	2.65882	1.06663	2.49273	6.31517	0.0126765	0.0272117	4069	protein_coding	HGNC Symbol	3	lysozyme [Source:HGNC Symbol;Acc:HGNC:6740]	0.123008	0.0982187	0	0.0311655	0	0	0.138441	0.234222	0.356426
ENSG00000052850	ALX4	8.07087	2.66648	1.01711	2.62162	6.34878	0.00875122	0.0195895	60529	protein_coding	HGNC Symbol	2	ALX homeobox 4 [Source:HGNC Symbol;Acc:HGNC:450]	0.0307521	0.0327396	0.103641	0.467483	0.0794178	0.367919	0.237328	0.0585556	0.305508
ENSG00000007062	PROM1	13.7022	2.67459	0.955176	2.8001	6.38458	0.00510861	0.0121544	8842	protein_coding	HGNC Symbol	20	prominin 1 [Source:HGNC Symbol;Acc:HGNC:9454]	0.0307521	0.229177	0.0259103	0.124662	0.238254	0.0408799	0.29666	0.497723	0.203672
ENSG00000078725	BRINP1	5.6738	2.68112	1.08042	2.48155	6.41354	0.0130814	0.0279275	1620	protein_coding	HGNC Symbol	3	BMP/retinoic acid inducible neural specific 1 [Source:HGNC Symbol;Acc:HGNC:2687]	0.0307521	0.0654791	0.0259103	0	0.10589	0.0613199	0.257105	0.0585556	0.127295
ENSG00000100078	PLA2G3	8.62761	2.6825	0.892635	3.00515	6.41969	0.0026545	0.00677905	50487	protein_coding	HGNC Symbol	1	phospholipase A2 group III [Source:HGNC Symbol;Acc:HGNC:17934]	0.0615042	0.0491093	0.0647758	0	0.0529452	0.0408799	0.118664	0.292778	0.203672
ENSG00000183682	BMP8A	11.0418	2.68323	0.827641	3.24202	6.42293	0.00118684	0.00327537	353500	protein_coding	HGNC Symbol	1	bone morphogenetic protein 8a [Source:HGNC Symbol;Acc:HGNC:21650]	0.0307521	0.0654791	0.129552	0.218159	0.119127	0.02044	0.316437	0.175667	0.330967
ENSG00000174137	FAM53A	184.233	2.68457	0.257409	10.4292	6.4289	1.82e-25	8.1e-24	152877	protein_coding	HGNC Symbol	7	family with sequence similarity 53 member A [Source:HGNC Symbol;Acc:HGNC:31860]	1.55298	1.08041	1.23074	1.12196	0.767706	0.776719	6.6254	3.86467	3.56426
ENSG00000112562	SMOC2	7.88945	2.69297	1.12467	2.39446	6.46643	0.0166447	0.0346171	64094	protein_coding	HGNC Symbol	6	SPARC related modular calcium binding 2 [Source:HGNC Symbol;Acc:HGNC:20323]	0.015376	0.0163698	0.129552	7.12132	7.09466	9.50458	0.415323	0.117111	0.101836
ENSG00000135547	HEY2	22.5885	2.71741	0.821456	3.30804	6.5769	0.000939521	0.00265164	23493	protein_coding	HGNC Symbol	2	hes related family bHLH transcription factor with YRPW motif 2 [Source:HGNC Symbol;Acc:HGNC:4881]	0.0461281	0.196437	0.207283	2.69582	2.09134	1.41036	0.158218	0.702667	0.712853
ENSG00000111087	GLI1	16.7971	2.72594	0.653063	4.17409	6.61593	2.99e-05	0.000113811	2735	protein_coding	HGNC Symbol	8	GLI family zinc finger 1 [Source:HGNC Symbol;Acc:HGNC:4317]	0.0922563	0.130958	0.116596	0.701224	0.35738	0.286159	0.415323	0.2635	0.560099
ENSG00000278828	HIST1H3H	141.662	2.73437	0.393154	6.95495	6.65467	3.53e-12	3.75e-11	8357	protein_coding	HGNC Symbol	1	histone cluster 1 H3 family member h [Source:HGNC Symbol;Acc:HGNC:4775]	1.55298	0.687531	0.647758	0.483065	0.370617	0.24528	2.88749	3.54261	3.89523
ENSG00000008735	MAPK8IP2	84.2583	2.73933	0.479661	5.71097	6.67758	1.12e-08	7.66e-08	23542	protein_coding	HGNC Symbol	2	mitogen-activated protein kinase 8 interacting protein 2 [Source:HGNC Symbol;Acc:HGNC:6883]	0.799554	0.540203	0.362745	0.249324	0.185308	0.16352	1.12731	2.45934	2.41861
ENSG00000184205	TSPYL2	2946.81	2.74422	0.193696	14.1677	6.70027	1.45e-45	2.49e-43	64061	protein_coding	HGNC Symbol	6	TSPY like 2 [Source:HGNC Symbol;Acc:HGNC:24358]	23.3562	18.8089	17.2304	77.5242	80.6223	62.485	69.9721	76.8542	70.5215
ENSG00000175175	PPM1E	32.3304	2.74423	0.52852	5.19229	6.70031	2.08e-07	1.17e-06	22843	protein_coding	HGNC Symbol	1	protein phosphatase, Mg2+/Mn2+ dependent 1E [Source:HGNC Symbol;Acc:HGNC:19322]	0.199889	0.294656	0.155462	0.405152	0.317671	0.12264	0.711983	0.585556	1.06928
ENSG00000078900	TP73	51.1057	2.76217	0.462706	5.96961	6.78418	2.38e-09	1.76e-08	7161	protein_coding	HGNC Symbol	14	tumor protein p73 [Source:HGNC Symbol;Acc:HGNC:12003]	0.353649	0.261916	0.388655	1.68294	2.46195	2.39148	0.850424	1.28822	1.553
ENSG00000164972	C9orf24	31.7048	2.76383	0.792453	3.48769	6.79195	0.000487219	0.00146255	84688	protein_coding	HGNC Symbol	7	chromosome 9 open reading frame 24 [Source:HGNC Symbol;Acc:HGNC:19919]	0.0768802	0.360135	0.181372	0.342821	0.132363	0.1022	0.237328	1.37606	0.611017
ENSG00000185008	ROBO2	118.264	2.77128	0.301751	9.184	6.82715	4.15e-20	1.11e-18	6092	protein_coding	HGNC Symbol	13	roundabout guidance receptor 2 [Source:HGNC Symbol;Acc:HGNC:10250]	0.722674	0.622052	0.971637	1.37128	2.01192	1.45124	2.98637	3.162	2.64774
ENSG00000164342	TLR3	424.171	2.77282	0.343583	8.0703	6.83441	7.01e-16	1.17e-14	7098	protein_coding	HGNC Symbol	5	toll like receptor 3 [Source:HGNC Symbol;Acc:HGNC:11849]	4.58206	2.25903	1.63235	16.4866	14.8644	11.4055	10.304	10.54	10.5655
ENSG00000142449	FBN3	14.9067	2.77682	0.700531	3.96388	6.85338	7.37e-05	0.000260158	84467	protein_coding	HGNC Symbol	9	fibrillin 3 [Source:HGNC Symbol;Acc:HGNC:18794]	0.123008	0.0491093	0.116596	0.062331	0.119127	0.0408799	0.29666	0.439167	0.356426
ENSG00000179698	WDR97	48.0808	2.77922	0.468936	5.92666	6.86483	3.09e-09	2.26e-08	340390	protein_coding	HGNC Symbol	6	WD repeat domain 97 [Source:HGNC Symbol;Acc:HGNC:26959]	0.184513	0.441984	0.310924	0.436317	0.370617	0.327039	1.0482	1.08328	1.40025
ENSG00000110031	LPXN	1686.54	2.78649	0.256511	10.8631	6.89951	1.73e-27	8.93e-26	9404	protein_coding	HGNC Symbol	5	leupaxin [Source:HGNC Symbol;Acc:HGNC:14061]	7.21136	11.7699	13.8361	16.9852	16.3865	15.8001	48.1775	41.9258	36.6865
ENSG00000174010	KLHL15	618.402	2.79545	0.242187	11.5425	6.94248	8.05e-31	5.25e-29	80311	protein_coding	HGNC Symbol	1	kelch like family member 15 [Source:HGNC Symbol;Acc:HGNC:29347]	4.24379	4.2234	3.57562	15.4269	12.323	7.44015	12.8552	16.3663	16.141
ENSG00000178607	ERN1	3549.82	2.82384	0.227315	12.4226	7.08046	1.97e-35	1.65e-33	2081	protein_coding	HGNC Symbol	8	endoplasmic reticulum to nucleus signaling 1 [Source:HGNC Symbol;Acc:HGNC:3449]	27.2771	19.9384	21.0003	32.6615	29.5567	21.3393	77.5666	83.3832	100.792
ENSG00000109758	HGFAC	12.7198	2.84083	0.798078	3.55958	7.1643	0.000371445	0.00113959	3083	protein_coding	HGNC Symbol	4	HGF activator [Source:HGNC Symbol;Acc:HGNC:4894]	0.0307521	0.130958	0.077731	0.218159	0.291199	0.12264	0.375769	0.409889	0.178213
ENSG00000135502	SLC26A10	6.26613	2.84425	1.26526	2.24795	7.18131	0.0245796	0.0484921	65012	protein_coding	HGNC Symbol	10	solute carrier family 26 member 10 [Source:HGNC Symbol;Acc:HGNC:14470]	0.107632	0.0163698	0	0.0311655	0.145599	0.0408799	0.276882	0.117111	0.101836
ENSG00000119737	GPR75	229.307	2.8446	0.480622	5.91858	7.18307	3.25e-09	2.37e-08	10936	protein_coding	HGNC Symbol	1	G protein-coupled receptor 75 [Source:HGNC Symbol;Acc:HGNC:4526]	0.907187	1.83342	1.55462	2.2595	3.03111	2.30972	2.39305	7.67078	6.26292
ENSG00000074966	TXK	40.4065	2.84643	0.508671	5.59581	7.19218	2.2e-08	1.43e-07	7294	protein_coding	HGNC Symbol	6	TXK tyrosine kinase [Source:HGNC Symbol;Acc:HGNC:12434]	0.15376	0.327396	0.272058	0.841469	0.622106	0.16352	0.909756	1.37606	0.712853
ENSG00000112599	GUCA1B	18.5064	2.849	0.656236	4.34143	7.20503	1.42e-05	5.8e-05	2979	protein_coding	HGNC Symbol	1	guanylate cyclase activator 1B [Source:HGNC Symbol;Acc:HGNC:4679]	0.0922563	0.180068	0.077731	0.124662	0.145599	0.16352	0.533987	0.585556	0.280049
ENSG00000130032	PRRG3	6.85037	2.85045	1.00288	2.84226	7.21224	0.00447946	0.0108397	79057	protein_coding	HGNC Symbol	6	proline rich and Gla domain 3 [Source:HGNC Symbol;Acc:HGNC:30798]	0.0768802	0.0163698	0.0388655	0.202576	0.158836	0.265719	0.29666	0.117111	0.127295
ENSG00000174564	IL20RB	49.1312	2.85098	0.372627	7.65102	7.21488	1.99e-14	2.83e-13	53833	protein_coding	HGNC Symbol	5	interleukin 20 receptor subunit beta [Source:HGNC Symbol;Acc:HGNC:6004]	0.353649	0.261916	0.310924	2.82048	1.40305	1.38992	1.50308	1.11256	1.1202
ENSG00000110851	PRDM4	8786.05	2.86336	0.285589	10.0262	7.27709	1.17e-23	4.35e-22	11108	protein_coding	HGNC Symbol	6	PR/SET domain 4 [Source:HGNC Symbol;Acc:HGNC:9348]	57.5372	52.7107	54.1396	81.1861	74.8381	71.7647	145.383	242.772	250.695
ENSG00000137449	CPEB2	1941.27	2.87091	0.302353	9.4952	7.31524	2.2e-21	6.36e-20	132864	protein_coding	HGNC Symbol	9	cytoplasmic polyadenylation element binding protein 2 [Source:HGNC Symbol;Acc:HGNC:21745]	13.0389	12.3428	10.7787	15.2088	18.2264	12.3253	31.0899	56.6525	53.2858
ENSG00000074211	PPP2R2C	26.0552	2.87176	0.698306	4.11246	7.31956	3.91e-05	0.000145612	5522	protein_coding	HGNC Symbol	9	protein phosphatase 2 regulatory subunit Bgamma [Source:HGNC Symbol;Acc:HGNC:9306]	0.0307521	0.294656	0.155462	0.186993	0.754469	0.470119	0.830647	0.702667	0.458263
ENSG00000175105	ZNF654	1888.23	2.87303	0.291005	9.87279	7.32601	5.46e-23	1.84e-21	55279	protein_coding	HGNC Symbol	4	zinc finger protein 654 [Source:HGNC Symbol;Acc:HGNC:25612]	12.6237	12.1627	10.3382	16.1437	14.6526	9.17754	31.6832	52.5244	53.3112
ENSG00000175600	SUGCT	122.723	2.8748	0.322326	8.9189	7.335	4.71e-19	1.12e-17	79783	protein_coding	HGNC Symbol	9	succinyl-CoA:glutarate-CoA transferase [Source:HGNC Symbol;Acc:HGNC:16001]	0.476657	0.916708	0.867996	1.02846	0.688288	0.981118	3.52036	3.07417	2.69866
ENSG00000057019	DCBLD2	15837.4	2.8774	0.244617	11.7629	7.34823	6.06e-32	4.26e-30	131566	protein_coding	HGNC Symbol	10	discoidin, CUB and LCCL domain containing 2 [Source:HGNC Symbol;Acc:HGNC:24627]	66.3323	109.596	115.858	121.499	136.03	109.456	418.745	406.054	366.05
ENSG00000135679	MDM2	24002.6	2.88577	0.224735	12.8408	7.39099	9.69e-38	1.08e-35	4193	protein_coding	HGNC Symbol	34	MDM2 proto-oncogene [Source:HGNC Symbol;Acc:HGNC:6973]	134.925	162.896	144.061	208.622	227.916	143.325	514.388	589.801	671.94
ENSG00000165105	RASEF	8.82136	2.89262	1.21271	2.38525	7.42616	0.0170675	0.0353526	158158	protein_coding	HGNC Symbol	2	RAS and EF-hand domain containing [Source:HGNC Symbol;Acc:HGNC:26464]	0.0307521	0.130958	0	0.358403	0.476507	0.347479	0.0791092	0.292778	0.25459
ENSG00000130783	CCDC62	24.9169	2.89308	0.620879	4.65965	7.42856	3.17e-06	1.45e-05	84660	protein_coding	HGNC Symbol	6	coiled-coil domain containing 62 [Source:HGNC Symbol;Acc:HGNC:30723]	0.138384	0.114588	0.194327	0.0934965	0.0661815	0.0408799	0.375769	0.878334	0.560099
ENSG00000006652	IFRD1	2542.58	2.89657	0.228062	12.7008	7.44652	5.85e-37	6.01e-35	3475	protein_coding	HGNC Symbol	17	interferon related developmental regulator 1 [Source:HGNC Symbol;Acc:HGNC:5456]	16.9905	13.7997	15.8442	52.1087	45.5858	38.652	52.9636	68.6564	66.3972
ENSG00000163235	TGFA	54.5177	2.90168	0.592094	4.9007	7.47294	9.55e-07	4.8e-06	7039	protein_coding	HGNC Symbol	9	transforming growth factor alpha [Source:HGNC Symbol;Acc:HGNC:11765]	0.15376	0.360135	0.479341	2.41533	2.32959	1.49212	2.88749	0.644112	0.916525
ENSG00000164100	NDST3	16.6028	2.90831	0.703586	4.13355	7.50737	3.57e-05	0.000133961	9348	protein_coding	HGNC Symbol	2	N-deacetylase and N-sulfotransferase 3 [Source:HGNC Symbol;Acc:HGNC:7682]	0.0615042	0.130958	0.103641	0.342821	0.60887	0.306599	0.276882	0.556278	0.381885
ENSG00000142675	CNKSR1	12.3529	2.91332	0.78371	3.71734	7.53348	0.000201332	0.00065023	10256	protein_coding	HGNC Symbol	14	connector enhancer of kinase suppressor of Ras 1 [Source:HGNC Symbol;Acc:HGNC:19700]	0.0461281	0.0818489	0.0906861	0.109079	0.0264726	0.0817598	0.197773	0.322056	0.381885
ENSG00000075213	SEMA3A	1774.79	2.91528	0.259242	11.2454	7.54371	2.44e-29	1.42e-27	10371	protein_coding	HGNC Symbol	7	semaphorin 3A [Source:HGNC Symbol;Acc:HGNC:10723]	11.5013	10.182	10.4807	37.757	46.9492	36.0357	33.2654	51.0605	46.2336
ENSG00000175003	SLC22A1	5.2304	2.92157	1.23488	2.36588	7.5767	0.0179874	0.0370252	6580	protein_coding	HGNC Symbol	8	solute carrier family 22 member 1 [Source:HGNC Symbol;Acc:HGNC:10963]	0.0307521	0.0654791	0	0.0934965	0.0926541	0.0613199	0.118664	0.117111	0.152754
ENSG00000137975	CLCA2	10.4015	2.93806	0.851432	3.45072	7.66378	0.000559083	0.0016523	9635	protein_coding	HGNC Symbol	3	chloride channel accessory 2 [Source:HGNC Symbol;Acc:HGNC:2016]	0.0615042	0.0327396	0.0906861	0.560979	0.330908	0.14308	0.355991	0.117111	0.330967
ENSG00000131379	C3orf20	15.0682	2.94719	0.983148	2.99771	7.71244	0.00272021	0.00693391	84077	protein_coding	HGNC Symbol	4	chromosome 3 open reading frame 20 [Source:HGNC Symbol;Acc:HGNC:25320]	0.015376	0.114588	0.129552	0.0311655	0.0397089	0.0408799	0.0791092	0.527	0.458263
ENSG00000156042	CFAP70	29.3204	2.94896	0.584103	5.0487	7.72193	4.45e-07	2.37e-06	118491	protein_coding	HGNC Symbol	8	cilia and flagella associated protein 70 [Source:HGNC Symbol;Acc:HGNC:30726]	0.169136	0.163698	0.181372	0.436317	0.450034	0.24528	0.454878	0.614834	1.06928
ENSG00000108950	FAM20A	12.7387	2.95133	1.14496	2.57768	7.73461	0.00994668	0.0219484	54757	protein_coding	HGNC Symbol	7	FAM20A, golgi associated secretory pathway pseudokinase [Source:HGNC Symbol;Acc:HGNC:23015]	0.015376	0.196437	0.0129552	0.296072	0.238254	0.12264	0.158218	0.146389	0.611017
ENSG00000175564	UCP3	62.2195	2.95576	0.450962	6.55434	7.75839	5.59e-11	5.1e-10	7352	protein_coding	HGNC Symbol	4	uncoupling protein 3 [Source:HGNC Symbol;Acc:HGNC:12519]	0.307521	0.229177	0.557072	1.18429	0.688288	0.674519	2.49194	1.37606	1.04382
ENSG00000183091	NEB	533.094	2.96687	0.360635	8.22678	7.81838	1.92e-16	3.38e-15	4703	protein_coding	HGNC Symbol	20	nebulin [Source:HGNC Symbol;Acc:HGNC:7720]	1.73749	4.12518	3.40721	3.67753	6.51226	4.61943	10.2446	14.1997	14.9699
ENSG00000163491	NEK10	96.4607	2.98359	0.421776	7.07388	7.90953	1.51e-12	1.68e-11	152110	protein_coding	HGNC Symbol	13	NIMA related kinase 10 [Source:HGNC Symbol;Acc:HGNC:18592]	0.799554	0.294656	0.582982	0.4519	0.714761	0.0817598	2.01729	2.108	3.05508
ENSG00000181026	AEN	7174.63	3.00173	0.287158	10.4532	8.00962	1.42e-25	6.39e-24	64782	protein_coding	HGNC Symbol	6	apoptosis enhancing nuclease [Source:HGNC Symbol;Acc:HGNC:25722]	37.1793	42.3159	43.4905	42.9928	44.6858	41.4114	122.263	203.481	202.348
ENSG00000049130	KITLG	2640.25	3.00305	0.171813	17.4786	8.01693	2.08e-68	7.13e-66	4254	protein_coding	HGNC Symbol	7	KIT ligand [Source:HGNC Symbol;Acc:HGNC:6343]	12.6545	15.8132	16.6992	77.6021	66.8036	44.5387	79.2477	64.0013	59.3705
ENSG00000006837	CDKL3	111.107	3.00438	0.374315	8.02634	8.02433	1e-15	1.64e-14	51265	protein_coding	HGNC Symbol	10	cyclin dependent kinase like 3 [Source:HGNC Symbol;Acc:HGNC:15483]	0.645794	0.638421	0.608893	3.41262	3.61351	3.82227	1.89862	3.33767	2.95325
ENSG00000177238	TRIM72	5.04849	3.02242	1.21501	2.48757	8.12527	0.0128618	0.0275304	493829	protein_coding	HGNC Symbol	2	tripartite motif containing 72 [Source:HGNC Symbol;Acc:HGNC:32671]	0.0307521	0.0163698	0.0388655	0.109079	0.0529452	0.0408799	0.237328	0.146389	0.025459
ENSG00000164761	TNFRSF11B	19.1524	3.02796	0.990403	3.0573	8.15657	0.00223337	0.00581017	4982	protein_coding	HGNC Symbol	3	TNF receptor superfamily member 11b [Source:HGNC Symbol;Acc:HGNC:11909]	0.184513	0.0982187	0.0518206	1.12196	0.569161	0.470119	1.46352	0.117111	0.101836
ENSG00000181634	TNFSF15	3021.8	3.04431	0.382913	7.95039	8.24952	1.86e-15	2.95e-14	9966	protein_coding	HGNC Symbol	2	TNF superfamily member 15 [Source:HGNC Symbol;Acc:HGNC:11931]	13.085	19.0217	18.2538	10.9079	8.40505	6.80651	162.569	42.2479	44.9606
ENSG00000042062	RIPOR3	39.7172	3.04543	0.549556	5.54163	8.25595	3e-08	1.9e-07	140876	protein_coding	HGNC Symbol	6	RIPOR family member 3 [Source:HGNC Symbol;Acc:HGNC:16168]	0.15376	0.376505	0.142507	0.373986	0.780942	0.2044	1.7404	0.702667	0.738312
ENSG00000100055	CYTH4	7.31516	3.04879	1.07555	2.83463	8.2752	0.00458788	0.0110759	27128	protein_coding	HGNC Symbol	11	cytohesin 4 [Source:HGNC Symbol;Acc:HGNC:9505]	0.0307521	0.0491093	0.0388655	0.420734	0.410326	0.347479	0.0791092	0.351334	0.101836
ENSG00000117525	F3	67.0545	3.05056	0.383581	7.95285	8.28534	1.82e-15	2.9e-14	2152	protein_coding	HGNC Symbol	4	coagulation factor III, tissue factor [Source:HGNC Symbol;Acc:HGNC:3541]	0.430529	0.294656	0.40161	2.68023	2.48843	2.08488	2.72927	1.20039	1.40025
ENSG00000175592	FOSL1	14499.1	3.06556	0.305965	10.0193	8.37193	1.25e-23	4.64e-22	8061	protein_coding	HGNC Symbol	5	FOS like 1, AP-1 transcription factor subunit [Source:HGNC Symbol;Acc:HGNC:13718]	52.2017	84.6645	100.985	75.4049	62.568	64.7742	287.997	395.104	398.765
ENSG00000137691	CFAP300	5.63898	3.07633	1.24897	2.46309	8.43465	0.0137745	0.0292627	85016	protein_coding	HGNC Symbol	5	cilia and flagella associated protein 300 [Source:HGNC Symbol;Acc:HGNC:28188]	0.0307521	0.0654791	0	0	0.0926541	0.0817598	0.237328	0.0585556	0.152754
ENSG00000131080	EDA2R	395.223	3.08162	0.223412	13.7935	8.46566	2.79e-43	4.09e-41	60401	protein_coding	HGNC Symbol	4	ectodysplasin A2 receptor [Source:HGNC Symbol;Acc:HGNC:17756]	1.89125	2.25903	2.28011	2.353	3.2826	1.79872	9.76999	10.6571	9.5726
ENSG00000069764	PLA2G10	15.6827	3.09488	0.73236	4.2259	8.54382	2.38e-05	9.32e-05	8399	protein_coding	HGNC Symbol	2	phospholipase A2 group X [Source:HGNC Symbol;Acc:HGNC:9029]	0.0461281	0.0982187	0.103641	0.218159	0.132363	0.0408799	0.257105	0.497723	0.407345
ENSG00000165244	ZNF367	1017.22	3.09502	0.188964	16.3789	8.54467	2.71e-60	6.95e-58	195828	protein_coding	HGNC Symbol	1	zinc finger protein 367 [Source:HGNC Symbol;Acc:HGNC:18320]	4.4898	5.86038	6.08893	8.10303	4.92391	4.08799	33.127	23.715	22.3276
ENSG00000181523	SGSH	18745.7	3.10482	0.320657	9.6827	8.6029	3.57e-22	1.1e-20	6448	protein_coding	HGNC Symbol	17	N-sulfoglucosamine sulfohydrolase [Source:HGNC Symbol;Acc:HGNC:10818]	112.414	94.3554	95.933	420.984	378.016	424.374	278.029	525.068	576.418
ENSG00000163545	NUAK2	446.262	3.12496	0.978817	3.19259	8.7238	0.00141005	0.00383505	81788	protein_coding	HGNC Symbol	1	NUAK family kinase 2 [Source:HGNC Symbol;Acc:HGNC:29558]	3.75175	1.98074	1.45098	3.72428	1.33687	1.4308	31.9799	2.72284	4.27712
ENSG00000165868	HSPA12A	8.23906	3.12515	0.979764	3.18969	8.72495	0.00142424	0.00386305	259217	protein_coding	HGNC Symbol	7	heat shock protein family A (Hsp70) member 12A [Source:HGNC Symbol;Acc:HGNC:19022]	0.015376	0.0327396	0.077731	0.218159	0.25149	0.14308	0.177996	0.292778	0.152754
ENSG00000143375	CGN	220.459	3.13103	0.376033	8.32647	8.7606	8.33e-17	1.51e-15	57530	protein_coding	HGNC Symbol	8	cingulin [Source:HGNC Symbol;Acc:HGNC:17429]	0.784178	1.50602	1.17892	2.39974	2.54137	2.71851	4.05435	5.12361	7.25582
ENSG00000143442	POGZ	13151.3	3.13551	0.297783	10.5295	8.78784	6.32e-26	3e-24	23126	protein_coding	HGNC Symbol	21	pogo transposable element derived with ZNF domain [Source:HGNC Symbol;Acc:HGNC:18801]	68.8385	72.1744	66.8486	116.715	106.01	143.448	212.962	374.434	386.901
ENSG00000273079	GRIN2B	9.47174	3.14318	0.902002	3.48467	8.8347	0.000492739	0.00147588	2904	protein_coding	HGNC Symbol	9	glutamate ionotropic receptor NMDA type subunit 2B [Source:HGNC Symbol;Acc:HGNC:4586]	0.0615042	0.0327396	0.0518206	0.140245	0.10589	0.1022	0.177996	0.380611	0.152754
ENSG00000135436	FAM186B	28.3194	3.16587	0.708194	4.47034	8.97474	7.81e-06	3.36e-05	84070	protein_coding	HGNC Symbol	5	family with sequence similarity 186 member B [Source:HGNC Symbol;Acc:HGNC:25296]	0.0768802	0.311026	0.0518206	0.17141	0.35738	0.347479	0.573542	0.790501	0.763771
ENSG00000164303	ENPP6	3.98895	3.17541	1.37536	2.30878	9.0343	0.0209558	0.0421323	133121	protein_coding	HGNC Symbol	4	ectonucleotide pyrophosphatase/phosphodiesterase 6 [Source:HGNC Symbol;Acc:HGNC:23409]	0	0.0491093	0.0129552	0.0311655	0	0	0.118664	0.0878334	0.101836
ENSG00000136040	PLXNC1	12.186	3.17586	0.78986	4.02079	9.03711	5.8e-05	0.000208848	10154	protein_coding	HGNC Symbol	11	plexin C1 [Source:HGNC Symbol;Acc:HGNC:9106]	0.0615042	0.0654791	0.0647758	0.436317	0.25149	0.24528	0.593319	0.175667	0.229131
ENSG00000253598	SLC10A5	11.1285	3.17677	0.830952	3.82305	9.04282	0.00013181	0.000443854	347051	protein_coding	HGNC Symbol	1	solute carrier family 10 member 5 [Source:HGNC Symbol;Acc:HGNC:22981]	0.0307521	0.0327396	0.103641	0.155828	0.158836	0	0.355991	0.234222	0.280049
ENSG00000177363	LRRN4CL	12.0654	3.18408	0.956818	3.32778	9.08873	0.000875415	0.00248954	221091	protein_coding	HGNC Symbol	1	LRRN4 C-terminal like [Source:HGNC Symbol;Acc:HGNC:33724]	0.123008	0	0.0647758	0.0934965	0.10589	0.0613199	0.533987	0.292778	0.152754
ENSG00000130766	SESN2	6013.02	3.20094	0.291577	10.978	9.1956	4.87e-28	2.62e-26	83667	protein_coding	HGNC Symbol	1	sestrin 2 [Source:HGNC Symbol;Acc:HGNC:20746]	34.6422	28.2051	28.6309	128.386	101.35	83.8447	101.359	169.401	177.577
ENSG00000167755	KLK6	44.7517	3.20214	0.647027	4.94901	9.20325	7.46e-07	3.82e-06	5653	protein_coding	HGNC Symbol	7	kallikrein related peptidase 6 [Source:HGNC Symbol;Acc:HGNC:6367]	0.0922563	0.425614	0.155462	3.72428	6.0887	4.80339	0.692206	0.995445	1.62938
ENSG00000180176	TH	3.99843	3.2076	1.36681	2.34678	9.23814	0.0189366	0.0386498	7054	protein_coding	HGNC Symbol	11	tyrosine hydroxylase [Source:HGNC Symbol;Acc:HGNC:11782]	0	0.0327396	0.0259103	0.109079	0.0529452	0.0817598	0.0791092	0.146389	0.0763771
ENSG00000184408	KCND2	3.8059	3.22255	1.34993	2.3872	9.33434	0.0169774	0.0352198	3751	protein_coding	HGNC Symbol	3	potassium voltage-gated channel subfamily D member 2 [Source:HGNC Symbol;Acc:HGNC:6238]	0.0307521	0	0.0259103	0.124662	0.0264726	0.0408799	0.138441	0.0878334	0.0763771
ENSG00000110169	HPX	55.6158	3.22409	0.470728	6.84915	9.34431	7.43e-12	7.59e-11	3263	protein_coding	HGNC Symbol	13	hemopexin [Source:HGNC Symbol;Acc:HGNC:5171]	0.261393	0.261916	0.297969	0.124662	0.330908	0.0613199	0.909756	1.8445	1.40025
ENSG00000142609	CFAP74	3.90944	3.2314	1.28642	2.51193	9.39176	0.0120072	0.0259513	85452	protein_coding	HGNC Symbol	10	cilia and flagella associated protein 74 [Source:HGNC Symbol;Acc:HGNC:29368]	0.015376	0.0163698	0.0259103	0.0467483	0.0132363	0.0408799	0.118664	0.0585556	0.127295
ENSG00000165646	SLC18A2	83.4993	3.24912	0.337873	9.61639	9.50786	6.82e-22	2.05e-20	6571	protein_coding	HGNC Symbol	3	solute carrier family 18 member A2 [Source:HGNC Symbol;Acc:HGNC:10935]	0.461281	0.474724	0.297969	0.342821	0.25149	0.2044	2.1755	2.16656	2.08764
ENSG00000165617	DACT1	28.3811	3.25427	0.586794	5.54586	9.54188	2.93e-08	1.86e-07	51339	protein_coding	HGNC Symbol	6	dishevelled binding antagonist of beta catenin 1 [Source:HGNC Symbol;Acc:HGNC:17748]	0.246017	0.0982187	0.077731	0.467483	0.238254	0.16352	0.73176	0.585556	0.865607
ENSG00000155629	PIK3AP1	15.8147	3.26356	0.779797	4.18514	9.60348	2.85e-05	0.000109224	118788	protein_coding	HGNC Symbol	6	phosphoinositide-3-kinase adaptor protein 1 [Source:HGNC Symbol;Acc:HGNC:30034]	0.0615042	0.0327396	0.129552	0.249324	0.383853	0.449679	0.276882	0.351334	0.560099
ENSG00000182687	GALR2	36.0908	3.27612	0.517006	6.33672	9.6875	2.35e-10	1.98e-09	8811	protein_coding	HGNC Symbol	1	galanin receptor 2 [Source:HGNC Symbol;Acc:HGNC:4133]	0.0922563	0.147328	0.272058	1.07521	0.873596	0.674519	1.02842	0.966167	0.814689
ENSG00000157388	CACNA1D	5.98989	3.277	1.15735	2.83147	9.69337	0.00463343	0.011176	776	protein_coding	HGNC Symbol	31	calcium voltage-gated channel subunit alpha1 D [Source:HGNC Symbol;Acc:HGNC:1391]	0.0307521	0.0327396	0.0259103	0.0467483	0.10589	0.0817598	0.316437	0.0292778	0.152754
ENSG00000163501	IHH	8.57139	3.31259	1.22444	2.70539	9.93548	0.00682247	0.0157485	3549	protein_coding	HGNC Symbol	1	Indian hedgehog signaling molecule [Source:HGNC Symbol;Acc:HGNC:5956]	0	0.0654791	0.0518206	0.0779138	0.0397089	0.1022	0.0395546	0.351334	0.229131
ENSG00000167588	GPD1	7.48084	3.31976	0.967268	3.4321	9.98498	0.000598931	0.00176246	2819	protein_coding	HGNC Symbol	7	glycerol-3-phosphate dehydrogenase 1 [Source:HGNC Symbol;Acc:HGNC:4455]	0.0461281	0.0327396	0.0259103	0.0467483	0.0926541	0.0408799	0.158218	0.234222	0.178213
ENSG00000165731	RET	5.10331	3.32612	1.28286	2.59274	10.0291	0.00952151	0.0211123	5979	protein_coding	HGNC Symbol	7	ret proto-oncogene [Source:HGNC Symbol;Acc:HGNC:9967]	0.015376	0.0327396	0.0259103	0.4519	0.489743	0.388359	0.336214	0.0292778	0.0763771
ENSG00000131242	RAB11FIP4	26.6162	3.32887	0.613205	5.42865	10.0482	5.68e-08	3.49e-07	84440	protein_coding	HGNC Symbol	11	RAB11 family interacting protein 4 [Source:HGNC Symbol;Acc:HGNC:30267]	0.199889	0.0982187	0.077731	1.09079	0.780942	0.674519	0.593319	0.497723	0.941984
ENSG00000180667	YOD1	1514.24	3.33364	0.218286	15.2719	10.0815	1.18e-52	2.48e-50	55432	protein_coding	HGNC Symbol	2	YOD1 deubiquitinase [Source:HGNC Symbol;Acc:HGNC:25035]	7.04223	7.21907	6.86624	25.5401	23.1106	15.7388	33.7401	41.2524	40.8363
ENSG00000156427	FGF18	32.6306	3.33524	0.523495	6.3711	10.0927	1.88e-10	1.61e-09	8817	protein_coding	HGNC Symbol	1	fibroblast growth factor 18 [Source:HGNC Symbol;Acc:HGNC:3674]	0.15376	0.229177	0.077731	1.23104	1.32363	1.10376	0.929533	0.849056	0.763771
ENSG00000182902	SLC25A18	111.973	3.34843	0.383124	8.7398	10.1854	2.34e-18	5.02e-17	83733	protein_coding	HGNC Symbol	6	solute carrier family 25 member 18 [Source:HGNC Symbol;Acc:HGNC:10988]	0.476657	0.474724	0.582982	0.810303	0.555925	0.347479	1.97773	3.19128	3.28422
ENSG00000270672	MTRNR2L6	5.38476	3.36051	1.16486	2.8849	10.271	0.00391539	0.00963365	100463482	protein_coding	HGNC Symbol	1	MT-RNR2 like 6 [Source:HGNC Symbol;Acc:HGNC:37163]	0.015376	0.0327396	0.0259103	0.186993	0.185308	0	0.158218	0.0585556	0.203672
ENSG00000118308	LRMP	4.33364	3.37676	1.42664	2.36693	10.3874	0.0179362	0.0369569	4033	protein_coding	HGNC Symbol	21	lymphoid restricted membrane protein [Source:HGNC Symbol;Acc:HGNC:6690]	0.0307521	0	0.0259103	0.062331	0.0264726	0	0.0395546	0.204945	0.0763771
ENSG00000155754	C2CD6	7.80812	3.38658	1.02263	3.31165	10.4583	0.000927462	0.00262483	151254	protein_coding	HGNC Symbol	5	C2 calcium dependent domain containing 6 [Source:HGNC Symbol;Acc:HGNC:14438]	0.015376	0.0491093	0.0388655	0.062331	0.0529452	0.0817598	0.177996	0.322056	0.101836
ENSG00000163492	CCDC141	5.16896	3.40219	1.43896	2.36433	10.5721	0.0180625	0.0371611	285025	protein_coding	HGNC Symbol	6	coiled-coil domain containing 141 [Source:HGNC Symbol;Acc:HGNC:26821]	0	0	0.0647758	0.062331	0.0264726	0	0.0988865	0.117111	0.178213
ENSG00000060566	CREB3L3	3.32428	3.40395	1.49839	2.27174	10.585	0.0231024	0.0459529	84699	protein_coding	HGNC Symbol	5	cAMP responsive element binding protein 3 like 3 [Source:HGNC Symbol;Acc:HGNC:18855]	0.0307521	0	0.0129552	0.0311655	0.0397089	0.0613199	0.0593319	0.117111	0.0763771
ENSG00000075891	PAX2	4.41711	3.40463	1.24752	2.72912	10.59	0.00635036	0.0147708	5076	protein_coding	HGNC Symbol	9	paired box 2 [Source:HGNC Symbol;Acc:HGNC:8616]	0.015376	0.0163698	0.0259103	0.0155828	0.0397089	0	0.0988865	0.0878334	0.152754
ENSG00000111913	RIPOR2	7.64221	3.40669	1.0064	3.38504	10.6051	0.000711686	0.00206321	9750	protein_coding	HGNC Symbol	18	RHO family interacting cell polarization regulator 2 [Source:HGNC Symbol;Acc:HGNC:13872]	0.0307521	0.0163698	0.0518206	4.20734	2.85904	2.67763	0.158218	0.146389	0.280049
ENSG00000175489	LRRC25	4.3277	3.42419	1.33008	2.57442	10.7345	0.0100408	0.0221502	126364	protein_coding	HGNC Symbol	2	leucine rich repeat containing 25 [Source:HGNC Symbol;Acc:HGNC:29806]	0	0.0163698	0.0388655	0.062331	0.0926541	0.0817598	0.158218	0.0878334	0.101836
ENSG00000179165	PXT1	6.5633	3.45309	1.11848	3.08729	10.9517	0.00201987	0.00529331	222659	protein_coding	HGNC Symbol	2	peroxisomal testis enriched protein 1 [Source:HGNC Symbol;Acc:HGNC:18312]	0.0307521	0	0.0518206	0.0934965	0.0794178	0	0.197773	0.117111	0.203672
ENSG00000083857	FAT1	1261.44	3.46881	0.431375	8.04129	11.0718	8.89e-16	1.46e-14	2195	protein_coding	HGNC Symbol	12	FAT atypical cadherin 1 [Source:HGNC Symbol;Acc:HGNC:3595]	2.1834	8.03756	5.76505	44.7069	87.4655	54.3294	22.7043	36.3923	36.8138
ENSG00000177614	PGBD5	7.24245	3.46915	1.19603	2.90055	11.0744	0.00372506	0.00919566	79605	protein_coding	HGNC Symbol	3	piggyBac transposable element derived 5 [Source:HGNC Symbol;Acc:HGNC:19405]	0	0.0818489	0.0129552	0.28049	0.0264726	0.16352	0.316437	0.175667	0.101836
ENSG00000165124	SVEP1	22.963	3.46958	0.570853	6.07788	11.0776	1.22e-09	9.37e-09	79987	protein_coding	HGNC Symbol	5	sushi, von Willebrand factor type A, EGF and pentraxin domain containing 1 [Source:HGNC Symbol;Acc:HGNC:15985]	0.0922563	0.0818489	0.116596	0.576562	0.383853	0.265719	0.632874	0.556278	0.611017
ENSG00000111886	GABRR2	27.8083	3.47184	0.534616	6.49408	11.095	8.35e-11	7.47e-10	2570	protein_coding	HGNC Symbol	3	gamma-aminobutyric acid type A receptor rho2 subunit [Source:HGNC Symbol;Acc:HGNC:4091]	0.15376	0.130958	0.077731	0.747972	0.516216	0.327039	1.00864	0.614834	0.611017
ENSG00000099834	CDHR5	26.9446	3.47552	0.596525	5.82627	11.1233	5.67e-09	4.01e-08	53841	protein_coding	HGNC Symbol	10	cadherin related family member 5 [Source:HGNC Symbol;Acc:HGNC:7521]	0.123008	0.114588	0.103641	0.670058	0.688288	0.572319	0.632874	1.02472	0.432804
ENSG00000165995	CACNB2	17.6724	3.48417	0.731121	4.76551	11.1902	1.88e-06	9.02e-06	783	protein_coding	HGNC Symbol	28	calcium voltage-gated channel auxiliary subunit beta 2 [Source:HGNC Symbol;Acc:HGNC:1402]	0.0307521	0.0982187	0.0906861	0.0779138	0.0529452	0	0.316437	0.468445	0.560099
ENSG00000091010	POU4F3	9.82863	3.48554	1.05775	3.29523	11.2009	0.000983409	0.00276317	5459	protein_coding	HGNC Symbol	1	POU class 4 homeobox 3 [Source:HGNC Symbol;Acc:HGNC:9220]	0	0.0982187	0.0259103	0	0.0794178	0.14308	0.177996	0.2635	0.305508
ENSG00000135678	CPM	155.93	3.49328	0.352273	9.91642	11.2612	3.53e-23	1.22e-21	1368	protein_coding	HGNC Symbol	13	carboxypeptidase M [Source:HGNC Symbol;Acc:HGNC:2311]	0.369025	0.982187	0.608893	0.607727	0.873596	0.470119	4.66744	3.77684	3.86977
ENSG00000007174	DNAH9	16.8663	3.49841	0.744646	4.69808	11.3012	2.63e-06	1.23e-05	1770	protein_coding	HGNC Symbol	15	dynein axonemal heavy chain 9 [Source:HGNC Symbol;Acc:HGNC:2953]	0.0615042	0.130958	0.0259103	0.545396	0.516216	0.367919	0.692206	0.351334	0.330967
ENSG00000182324	KCNJ14	113.066	3.49865	0.434023	8.06097	11.3031	7.57e-16	1.26e-14	3770	protein_coding	HGNC Symbol	2	potassium voltage-gated channel subfamily J member 14 [Source:HGNC Symbol;Acc:HGNC:6260]	0.276769	0.556573	0.570027	0.17141	0.370617	0.347479	2.03706	3.83539	2.74958
ENSG00000163485	ADORA1	14.468	3.50741	0.734713	4.77385	11.372	1.81e-06	8.7e-06	134	protein_coding	HGNC Symbol	9	adenosine A1 receptor [Source:HGNC Symbol;Acc:HGNC:262]	0.0768802	0.0818489	0.0259103	1.65177	0.979487	1.36948	0.435101	0.351334	0.356426
ENSG00000164181	ELOVL7	7.16601	3.53615	1.18425	2.98599	11.6008	0.00282664	0.00717181	79993	protein_coding	HGNC Symbol	7	ELOVL fatty acid elongase 7 [Source:HGNC Symbol;Acc:HGNC:26292]	0.0615042	0	0.0259103	0.109079	0	0	0.158218	0.322056	0.0763771
ENSG00000021488	SLC7A9	7.85615	3.54457	1.40999	2.5139	11.6686	0.0119405	0.0258411	11136	protein_coding	HGNC Symbol	6	solute carrier family 7 member 9 [Source:HGNC Symbol;Acc:HGNC:11067]	0	0.0982187	0	0.0311655	0.0529452	0.0817598	0.395546	0.0585556	0.203672
ENSG00000181392	SYNE4	10.6484	3.55457	1.12754	3.15251	11.7499	0.00161872	0.00433329	163183	protein_coding	HGNC Symbol	8	spectrin repeat containing nuclear envelope family member 4 [Source:HGNC Symbol;Acc:HGNC:26703]	0	0.0327396	0.0906861	0.155828	0.158836	0.388359	0.0988865	0.234222	0.458263
ENSG00000182578	CSF1R	15.3268	3.5563	0.886691	4.01075	11.7639	6.05e-05	0.000216789	1436	protein_coding	HGNC Symbol	9	colony stimulating factor 1 receptor [Source:HGNC Symbol;Acc:HGNC:2433]	0.0922563	0.0982187	0	0	0.132363	0.14308	0.355991	0.322056	0.509181
ENSG00000155265	GOLGA7B	12.7361	3.55687	0.941723	3.77698	11.7686	0.000158742	0.000523805	401647	protein_coding	HGNC Symbol	3	golgin A7 family member B [Source:HGNC Symbol;Acc:HGNC:31668]	0.0922563	0.0654791	0	0.17141	0.291199	0.0817598	0.237328	0.380611	0.356426
ENSG00000157766	ACAN	10.1686	3.56623	1.04454	3.41416	11.8452	0.000639785	0.00187395	176	protein_coding	HGNC Symbol	9	aggrecan [Source:HGNC Symbol;Acc:HGNC:319]	0.0307521	0.0654791	0.0259103	0.0934965	0.0397089	0.16352	0.0988865	0.146389	0.509181
ENSG00000137501	SYTL2	121.897	3.57386	0.326932	10.9315	11.908	8.15e-28	4.29e-26	54843	protein_coding	HGNC Symbol	30	synaptotagmin like 2 [Source:HGNC Symbol;Acc:HGNC:15585]	0.322897	0.638421	0.492296	2.58674	3.865	2.37104	3.34236	3.24984	3.00417
ENSG00000142182	DNMT3L	6.45955	3.57768	1.27386	2.80853	11.9396	0.00497675	0.0118763	29947	protein_coding	HGNC Symbol	4	DNA methyltransferase 3 like [Source:HGNC Symbol;Acc:HGNC:2980]	0	0.0654791	0.0129552	0.0155828	0.0926541	0.02044	0.197773	0.0585556	0.25459
ENSG00000273542	HIST1H4K	60.4981	3.58359	0.534547	6.70398	11.9886	2.03e-11	1.93e-10	8362	protein_coding	HGNC Symbol	1	histone cluster 1 H4 family member k [Source:HGNC Symbol;Acc:HGNC:4784]	0.369025	0.130958	0.220238	0.155828	0.25149	0.0817598	0.909756	1.63956	2.03672
ENSG00000130182	ZSCAN10	5.91077	3.60563	1.43069	2.52021	12.1731	0.0117284	0.0254292	84891	protein_coding	HGNC Symbol	10	zinc finger and SCAN domain containing 10 [Source:HGNC Symbol;Acc:HGNC:12997]	0	0	0.0647758	0.202576	0.198545	0.24528	0.118664	0.2635	0.0763771
ENSG00000054356	PTPRN	7.88335	3.61461	1.16483	3.10311	12.2491	0.00191496	0.00504898	5798	protein_coding	HGNC Symbol	19	protein tyrosine phosphatase, receptor type N [Source:HGNC Symbol;Acc:HGNC:9676]	0.015376	0.0491093	0.0259103	0.062331	0.10589	0.0408799	0.0395546	0.234222	0.305508
ENSG00000109063	MYH3	52.4719	3.61538	0.508362	7.11182	12.2557	1.15e-12	1.3e-11	4621	protein_coding	HGNC Symbol	5	myosin heavy chain 3 [Source:HGNC Symbol;Acc:HGNC:7573]	0.215265	0.114588	0.272058	0.919382	0.582397	0.306599	0.949311	1.75667	1.32387
ENSG00000087074	PPP1R15A	18871.2	3.61838	0.217144	16.6635	12.2812	2.41e-62	7.34e-60	23645	protein_coding	HGNC Symbol	2	protein phosphatase 1 regulatory subunit 15A [Source:HGNC Symbol;Acc:HGNC:14375]	70.8989	71.4541	77.3682	103.734	81.4827	77.6719	419.516	519.593	526.06
ENSG00000163359	COL6A3	10.2882	3.62359	0.900347	4.02466	12.3256	5.71e-05	0.000205988	1293	protein_coding	HGNC Symbol	14	collagen type VI alpha 3 chain [Source:HGNC Symbol;Acc:HGNC:2213]	0.015376	0.0491093	0.0518206	0.202576	0.119127	0.14308	0.21755	0.351334	0.229131
ENSG00000143365	RORC	5.3764	3.62363	1.30793	2.77051	12.326	0.00559686	0.0131937	6097	protein_coding	HGNC Symbol	8	RAR related orphan receptor C [Source:HGNC Symbol;Acc:HGNC:10260]	0	0.0491093	0.0129552	0.109079	0.0529452	0.0613199	0.0791092	0.175667	0.152754
ENSG00000109321	AREG	20.6217	3.63281	0.652161	5.57042	12.4047	2.54e-08	1.64e-07	374	protein_coding	HGNC Symbol	3	amphiregulin [Source:HGNC Symbol;Acc:HGNC:651]	0.0922563	0.0982187	0.0518206	1.43361	0.423562	0.531439	0.791092	0.585556	0.305508
ENSG00000163092	XIRP2	139.146	3.6776	0.315396	11.6603	12.7958	2.03e-31	1.39e-29	129446	protein_coding	HGNC Symbol	7	xin actin binding repeat containing 2 [Source:HGNC Symbol;Acc:HGNC:14303]	0.476657	0.556573	0.518206	0.825886	0.688288	0.572319	3.14459	3.83539	3.86977
ENSG00000117400	MPL	13.3668	3.68208	0.884753	4.1617	12.8356	3.16e-05	0.000119775	4352	protein_coding	HGNC Symbol	4	MPL proto-oncogene, thrombopoietin receptor [Source:HGNC Symbol;Acc:HGNC:7217]	0.0307521	0.0654791	0.0518206	0.124662	0.119127	0.0817598	0.237328	0.175667	0.611017
ENSG00000253309	SERPINE3	24.082	3.69544	0.669062	5.52331	12.955	3.33e-08	2.1e-07	647174	protein_coding	HGNC Symbol	4	serpin family E member 3 [Source:HGNC Symbol;Acc:HGNC:24774]	0.0922563	0.0654791	0.103641	0.0311655	0.132363	0.14308	0.375769	0.907612	0.560099
ENSG00000057657	PRDM1	280.533	3.70196	0.256456	14.4351	13.0137	3.11e-47	5.68e-45	639	protein_coding	HGNC Symbol	10	PR/SET domain 1 [Source:HGNC Symbol;Acc:HGNC:9346]	0.73805	1.27684	1.07528	2.77373	2.31635	1.77828	9.59199	6.79245	6.28838
ENSG00000174600	CMKLR1	43.3908	3.7047	0.508124	7.29094	13.0385	3.08e-13	3.7e-12	1240	protein_coding	HGNC Symbol	6	chemerin chemokine-like receptor 1 [Source:HGNC Symbol;Acc:HGNC:2121]	0.138384	0.245547	0.103641	8.55493	5.90339	3.72007	1.87884	0.878334	0.840148
ENSG00000050730	TNIP3	48.6742	3.70758	0.986643	3.75778	13.0645	0.00017143	0.000560493	79931	protein_coding	HGNC Symbol	7	TNFAIP3 interacting protein 3 [Source:HGNC Symbol;Acc:HGNC:19315]	0.353649	0.0654791	0.129552	1.41803	0.436798	0.470119	4.0939	0.117111	0.305508
ENSG00000120149	MSX2	29.3366	3.72879	0.585445	6.36916	13.258	1.9e-10	1.62e-09	4488	protein_coding	HGNC Symbol	2	msh homeobox 2 [Source:HGNC Symbol;Acc:HGNC:7392]	0.0922563	0.180068	0.0518206	0.872634	0.767706	0.490559	0.988865	0.819778	0.560099
ENSG00000167011	NAT16	6.47748	3.735	1.18236	3.15893	13.3152	0.00158351	0.00424736	375607	protein_coding	HGNC Symbol	4	N-acetyltransferase 16 (putative) [Source:HGNC Symbol;Acc:HGNC:22030]	0.015376	0	0.0518206	0.0311655	0.0661815	0.0408799	0.257105	0.175667	0.101836
ENSG00000056558	TRAF1	706.148	3.73621	0.884142	4.2258	13.3263	2.38e-05	9.32e-05	7185	protein_coding	HGNC Symbol	3	TNF receptor associated factor 1 [Source:HGNC Symbol;Acc:HGNC:12031]	5.01259	1.71883	1.03641	3.81777	0.86036	1.30816	44.2418	7.52439	10.2091
ENSG00000042832	TG	44.2255	3.74221	0.548551	6.82199	13.3819	8.98e-12	9.07e-11	7038	protein_coding	HGNC Symbol	20	thyroglobulin [Source:HGNC Symbol;Acc:HGNC:11764]	0.199889	0.130958	0.142507	0.296072	0.542689	0.265719	0.692206	1.11256	1.57846
ENSG00000175920	DOK7	14.1142	3.74778	0.866842	4.32349	13.4336	1.54e-05	6.25e-05	285489	protein_coding	HGNC Symbol	7	docking protein 7 [Source:HGNC Symbol;Acc:HGNC:26594]	0.0307521	0.0654791	0.0518206	0.0467483	0.291199	0.12264	0.158218	0.527	0.381885
ENSG00000136002	ARHGEF4	46.613	3.74971	0.650031	5.7685	13.4516	8e-09	5.54e-08	50649	protein_coding	HGNC Symbol	18	Rho guanine nucleotide exchange factor 4 [Source:HGNC Symbol;Acc:HGNC:684]	0.184513	0.196437	0.116596	0.732389	0.661815	1.00156	0.395546	1.66883	1.42571
ENSG00000081985	IL12RB2	17.5044	3.75733	0.806834	4.65688	13.5229	3.21e-06	1.47e-05	3595	protein_coding	HGNC Symbol	7	interleukin 12 receptor subunit beta 2 [Source:HGNC Symbol;Acc:HGNC:5972]	0.0307521	0.130958	0.0259103	0.0155828	0.145599	0.0817598	0.336214	0.585556	0.432804
ENSG00000142513	ACP4	15.9527	3.75734	0.86327	4.35245	13.523	1.35e-05	5.54e-05	93650	protein_coding	HGNC Symbol	1	acid phosphatase 4 [Source:HGNC Symbol;Acc:HGNC:14376]	0.0461281	0.0982187	0.0259103	0.202576	0.0264726	0.12264	0.177996	0.439167	0.585558
ENSG00000111405	ENDOU	16.6733	3.76564	0.771611	4.88023	13.601	1.06e-06	5.29e-06	8909	protein_coding	HGNC Symbol	4	endonuclease, poly(U) specific [Source:HGNC Symbol;Acc:HGNC:14369]	0.015376	0.0654791	0.0906861	0.0779138	0.0794178	0.02044	0.355991	0.409889	0.53464
ENSG00000181378	CFAP65	4.26061	3.78892	1.41843	2.67121	13.8222	0.00755777	0.0172279	255101	protein_coding	HGNC Symbol	13	cilia and flagella associated protein 65 [Source:HGNC Symbol;Acc:HGNC:25325]	0.0307521	0	0.0129552	0.0311655	0.0264726	0.0408799	0.0791092	0.175667	0.0763771
ENSG00000095587	TLL2	47.0762	3.79546	0.512064	7.41207	13.885	1.24e-13	1.6e-12	7093	protein_coding	HGNC Symbol	3	tolloid like 2 [Source:HGNC Symbol;Acc:HGNC:11844]	0.123008	0.163698	0.194327	0.28049	0.595634	0.490559	0.830647	1.40533	1.40025
ENSG00000163497	FEV	8.05284	3.82032	1.27724	2.99107	14.1263	0.00277999	0.00706513	54738	protein_coding	HGNC Symbol	2	FEV, ETS transcription factor [Source:HGNC Symbol;Acc:HGNC:18562]	0	0	0.077731	0.062331	0.0661815	0.14308	0.29666	0.2635	0.101836
ENSG00000090339	ICAM1	9615.93	3.82273	0.748257	5.10886	14.15	3.24e-07	1.76e-06	3383	protein_coding	HGNC Symbol	5	intercellular adhesion molecule 1 [Source:HGNC Symbol;Acc:HGNC:5344]	61.6426	19.2509	18.9404	339.47	163.124	146.268	553.191	126.48	155.351
ENSG00000111452	ADGRD1	4.03978	3.82638	1.54661	2.47404	14.1859	0.0133593	0.0284766	283383	protein_coding	HGNC Symbol	16	adhesion G protein-coupled receptor D1 [Source:HGNC Symbol;Acc:HGNC:19893]	0	0	0.0388655	0.0155828	0.0132363	0	0.177996	0.0585556	0.101836
ENSG00000007314	SCN4A	30.6749	3.82664	0.677024	5.65216	14.1884	1.58e-08	1.06e-07	6329	protein_coding	HGNC Symbol	3	sodium voltage-gated channel alpha subunit 4 [Source:HGNC Symbol;Acc:HGNC:10591]	0.169136	0.0654791	0.077731	0.592145	0.582397	0.388359	0.395546	0.819778	1.1202
ENSG00000012124	CD22	2.94777	3.86108	1.67999	2.29827	14.5312	0.0215465	0.043193	933	protein_coding	HGNC Symbol	34	CD22 molecule [Source:HGNC Symbol;Acc:HGNC:1643]	0.015376	0	0.0129552	0.155828	0.119127	0.2044	0.0395546	0.0585556	0.127295
ENSG00000162998	FRZB	25.9124	3.86798	0.653839	5.9158	14.6009	3.3e-09	2.4e-08	2487	protein_coding	HGNC Symbol	1	frizzled related protein [Source:HGNC Symbol;Acc:HGNC:3959]	0.107632	0.0982187	0.0518206	0.218159	0.185308	0.0408799	0.435101	0.673389	0.891066
ENSG00000120659	TNFSF11	5.46988	3.87102	1.46693	2.63886	14.6317	0.00831862	0.0187184	8600	protein_coding	HGNC Symbol	5	TNF superfamily member 11 [Source:HGNC Symbol;Acc:HGNC:11926]	0	0	0.0518206	0	0.0264726	0	0.316437	0.0585556	0.101836
ENSG00000158517	NCF1	8.65533	3.88053	1.24969	3.10521	14.7284	0.00190146	0.00501661	653361	protein_coding	HGNC Symbol	11	neutrophil cytosolic factor 1 [Source:HGNC Symbol;Acc:HGNC:7660]	0.0307521	0	0.0518206	0.0779138	0.0529452	0	0.118664	0.0585556	0.483722
ENSG00000108576	SLC6A4	17.2776	3.88625	1.13614	3.42058	14.7869	0.00062488	0.00183356	6532	protein_coding	HGNC Symbol	6	solute carrier family 6 member 4 [Source:HGNC Symbol;Acc:HGNC:11050]	0.107632	0	0.0647758	0.202576	0.317671	0.0817598	1.08775	0.0292778	0.407345
ENSG00000143552	NUP210L	9.10704	3.89429	1.01134	3.85061	14.8696	0.000117824	0.000401197	91181	protein_coding	HGNC Symbol	3	nucleoporin 210 like [Source:HGNC Symbol;Acc:HGNC:29915]	0.0307521	0.0327396	0.0259103	0.0779138	0.185308	0.0817598	0.257105	0.0878334	0.381885
ENSG00000166016	ABTB2	160.089	3.9203	0.379057	10.3422	15.14	4.54e-25	1.92e-23	25841	protein_coding	HGNC Symbol	2	ankyrin repeat and BTB domain containing 2 [Source:HGNC Symbol;Acc:HGNC:23842]	0.276769	0.605682	0.634803	8.43027	7.45204	7.35839	3.67858	3.9525	4.98997
ENSG00000165805	C12orf50	4.69228	3.92202	1.65214	2.3739	15.1581	0.0176011	0.0363303	160419	protein_coding	HGNC Symbol	5	chromosome 12 open reading frame 50 [Source:HGNC Symbol;Acc:HGNC:26665]	0.0461281	0	0	0.0155828	0	0	0.0395546	0.0585556	0.25459
ENSG00000157423	HYDIN	18.9344	3.92793	0.937031	4.19189	15.2204	2.77e-05	0.000106318	54768	protein_coding	HGNC Symbol	23	HYDIN, axonemal central pair apparatus protein [Source:HGNC Symbol;Acc:HGNC:19368]	0	0.0982187	0.077731	0.124662	0.10589	0.0408799	0.21755	0.819778	0.407345
ENSG00000182308	DCAF4L1	16.8948	3.96089	1.04345	3.79595	15.5721	0.000147079	0.000488854	285429	protein_coding	HGNC Symbol	1	DDB1 and CUL4 associated factor 4 like 1 [Source:HGNC Symbol;Acc:HGNC:27723]	0	0.130958	0.0259103	0.155828	0.0661815	0.12264	0.158218	0.585556	0.53464
ENSG00000118513	MYB	15.5414	3.96351	0.751582	5.27356	15.6004	1.34e-07	7.74e-07	4602	protein_coding	HGNC Symbol	42	MYB proto-oncogene, transcription factor [Source:HGNC Symbol;Acc:HGNC:7545]	0.0615042	0.0327396	0.0518206	1.34012	0.86036	0.572319	0.672428	0.351334	0.280049
ENSG00000183729	NPBWR1	21.2749	3.97086	0.907601	4.37512	15.6801	1.21e-05	5.02e-05	2831	protein_coding	HGNC Symbol	1	neuropeptides B and W receptor 1 [Source:HGNC Symbol;Acc:HGNC:4522]	0	0.0327396	0.155462	0.202576	0.264726	0.18396	0.454878	0.790501	0.432804
ENSG00000155714	PDZD9	3.48817	3.97411	1.76684	2.24928	15.7154	0.0244948	0.0483711	255762	protein_coding	HGNC Symbol	3	PDZ domain containing 9 [Source:HGNC Symbol;Acc:HGNC:28740]	0	0.0327396	0	0	0.0264726	0.02044	0.0395546	0.175667	0.0509181
ENSG00000142185	TRPM2	8.19437	3.97591	1.04172	3.81668	15.7351	0.000135259	0.000453525	7226	protein_coding	HGNC Symbol	8	transient receptor potential cation channel subfamily M member 2 [Source:HGNC Symbol;Acc:HGNC:12339]	0.0307521	0.0327396	0.0129552	0.124662	0.119127	0.02044	0.158218	0.175667	0.305508
ENSG00000137709	POU2F3	6.97082	3.99677	1.31691	3.03496	15.9643	0.0024057	0.00622105	25833	protein_coding	HGNC Symbol	7	POU class 2 homeobox 3 [Source:HGNC Symbol;Acc:HGNC:19864]	0	0.0654791	0	0.124662	0.119127	0.0408799	0.177996	0.146389	0.229131
ENSG00000137460	FHDC1	52.2535	4.02491	0.574541	7.00544	16.2786	2.46e-12	2.67e-11	85462	protein_coding	HGNC Symbol	2	FH2 domain containing 1 [Source:HGNC Symbol;Acc:HGNC:29363]	0.184513	0.180068	0.103641	4.45667	2.92522	2.26884	0.672428	1.581	1.75667
ENSG00000176049	JAKMIP2	7.03509	4.03203	1.19549	3.3727	16.3592	0.00074434	0.00214576	9832	protein_coding	HGNC Symbol	6	janus kinase and microtubule interacting protein 2 [Source:HGNC Symbol;Acc:HGNC:29067]	0.015376	0.0491093	0	0.0934965	0.410326	0.306599	0.138441	0.234222	0.178213
ENSG00000182175	RGMA	67.2021	4.03729	0.421185	9.58555	16.4189	9.2e-22	2.73e-20	56963	protein_coding	HGNC Symbol	13	repulsive guidance molecule BMP co-receptor a [Source:HGNC Symbol;Acc:HGNC:30308]	0.184513	0.229177	0.181372	0.825886	0.622106	0.286159	1.54263	1.63956	2.13856
ENSG00000136881	BAAT	14.7186	4.03918	1.28133	3.15233	16.4405	0.00161971	0.00433452	570	protein_coding	HGNC Symbol	2	bile acid-CoA:amino acid N-acyltransferase [Source:HGNC Symbol;Acc:HGNC:932]	0	0.130958	0	0	0	0	0.118664	0.380611	0.611017
ENSG00000176160	HSF5	6.42682	4.06316	1.42928	2.84281	16.716	0.00447177	0.0108274	124535	protein_coding	HGNC Symbol	1	heat shock transcription factor 5 [Source:HGNC Symbol;Acc:HGNC:26862]	0	0	0.0518206	0.140245	0.10589	0.02044	0.0593319	0.175667	0.25459
ENSG00000119888	EPCAM	92.2919	4.06472	0.426696	9.52602	16.7341	1.63e-21	4.78e-20	4072	protein_coding	HGNC Symbol	6	epithelial cell adhesion molecule [Source:HGNC Symbol;Acc:HGNC:11529]	0.292145	0.180068	0.323879	1.16871	0.926541	1.28772	1.76018	2.54717	2.92779
ENSG00000174607	UGT8	3.6803	4.06713	1.70955	2.37907	16.7621	0.0173565	0.0358975	7368	protein_coding	HGNC Symbol	3	UDP glycosyltransferase 8 [Source:HGNC Symbol;Acc:HGNC:12555]	0	0.0327396	0	0.202576	0.330908	0.16352	0.0593319	0.175667	0.0509181
ENSG00000179603	GRM8	28.7829	4.08409	0.726484	5.62172	16.9603	1.89e-08	1.25e-07	2918	protein_coding	HGNC Symbol	15	glutamate metabotropic receptor 8 [Source:HGNC Symbol;Acc:HGNC:4600]	0.0307521	0.196437	0.0259103	0.0311655	0.0661815	0.0613199	1.06797	0.673389	0.636476
ENSG00000130649	CYP2E1	13.8856	4.09847	0.86371	4.74519	17.1302	2.08e-06	9.86e-06	1571	protein_coding	HGNC Symbol	10	cytochrome P450 family 2 subfamily E member 1 [Source:HGNC Symbol;Acc:HGNC:2631]	0.0307521	0.0327396	0.0518206	0.28049	0.264726	0.0613199	0.316437	0.585556	0.203672
ENSG00000164778	EN2	7.15758	4.10685	1.31779	3.11647	17.23	0.00183031	0.00485383	2020	protein_coding	HGNC Symbol	1	engrailed homeobox 2 [Source:HGNC Symbol;Acc:HGNC:3343]	0	0.0327396	0.0259103	0.327238	0.291199	0.14308	0.0395546	0.322056	0.178213
ENSG00000175161	CADM2	8.90404	4.11379	1.05321	3.90593	17.313	9.39e-05	0.000325135	253559	protein_coding	HGNC Symbol	5	cell adhesion molecule 2 [Source:HGNC Symbol;Acc:HGNC:29849]	0.0461281	0.0327396	0	0.28049	0.330908	0.24528	0.355991	0.234222	0.152754
ENSG00000057468	MSH4	16.2595	4.16898	1.10975	3.75668	17.9882	0.000172182	0.000562726	4438	protein_coding	HGNC Symbol	1	mutS homolog 4 [Source:HGNC Symbol;Acc:HGNC:7327]	0.107632	0	0.0259103	0.0311655	0.0794178	0.0408799	0.0791092	0.585556	0.560099
ENSG00000130294	KIF1A	49.9653	4.18015	0.584886	7.14695	18.128	8.87e-13	1.02e-11	547	protein_coding	HGNC Symbol	31	kinesin family member 1A [Source:HGNC Symbol;Acc:HGNC:888]	0.0307521	0.212807	0.155462	1.37128	1.03243	0.940238	1.06797	1.25895	1.62938
ENSG00000183160	TMEM119	5.41587	4.19039	1.48989	2.81255	18.2571	0.00491511	0.0117546	338773	protein_coding	HGNC Symbol	4	transmembrane protein 119 [Source:HGNC Symbol;Acc:HGNC:27884]	0.0461281	0	0	0.0934965	0.0132363	0.0408799	0.316437	0.0585556	0.101836
ENSG00000143333	RGS16	5.74149	4.19516	1.31491	3.19046	18.3176	0.00142045	0.00385531	6004	protein_coding	HGNC Symbol	1	regulator of G protein signaling 16 [Source:HGNC Symbol;Acc:HGNC:9997]	0	0.0327396	0.0129552	0.545396	0.304435	0.327039	0.118664	0.234222	0.101836
ENSG00000091831	ESR1	31.7111	4.21463	0.76207	5.5305	18.5665	3.19e-08	2.02e-07	2099	protein_coding	HGNC Symbol	15	estrogen receptor 1 [Source:HGNC Symbol;Acc:HGNC:3467]	0.0461281	0.0818489	0.116596	0.514231	0.238254	0.449679	0.257105	1.14183	1.01836
ENSG00000174844	DNAH12	25.0343	4.21858	0.817001	5.16349	18.6173	2.42e-07	1.35e-06	201625	protein_coding	HGNC Symbol	9	dynein axonemal heavy chain 12 [Source:HGNC Symbol;Acc:HGNC:2943]	0.107632	0.0654791	0.0259103	0.311655	0.25149	0	0.21755	0.878334	0.814689
ENSG00000069696	DRD4	23.0279	4.22032	0.810923	5.20435	18.6399	1.95e-07	1.1e-06	1815	protein_coding	HGNC Symbol	2	dopamine receptor D4 [Source:HGNC Symbol;Acc:HGNC:3025]	0	0.130958	0.0518206	3.41262	1.04567	1.6352	0.909756	0.351334	0.661935
ENSG00000278570	NR2E3	25.2091	4.22608	0.929814	4.54508	18.7145	5.49e-06	2.41e-05	10002	protein_coding	HGNC Symbol	4	nuclear receptor subfamily 2 group E member 3 [Source:HGNC Symbol;Acc:HGNC:7974]	0.0307521	0.0163698	0.142507	0.264907	0.238254	0.408799	0.177996	1.054	0.687394
ENSG00000095397	WHRN	268.492	4.26262	0.428343	9.95144	19.1945	2.49e-23	8.69e-22	25861	protein_coding	HGNC Symbol	5	whirlin [Source:HGNC Symbol;Acc:HGNC:16361]	0.415153	0.605682	1.0105	4.05152	4.26209	4.08799	4.35101	7.99284	8.65607
ENSG00000164796	CSMD3	31.77	4.3344	0.808825	5.35889	20.1737	8.37e-08	5.01e-07	114788	protein_coding	HGNC Symbol	10	CUB and Sushi multiple domains 3 [Source:HGNC Symbol;Acc:HGNC:19291]	0	0.180068	0.0518206	0.389569	0.688288	0.1022	0.632874	0.761223	1.1202
ENSG00000155530	LRGUK	10.4513	4.35062	0.959115	4.53608	20.4018	5.73e-06	2.51e-05	136332	protein_coding	HGNC Symbol	3	leucine rich repeats and guanylate kinase domain containing [Source:HGNC Symbol;Acc:HGNC:21964]	0.0307521	0.0327396	0.0129552	0.249324	0.185308	0.14308	0.237328	0.292778	0.305508
ENSG00000085465	OVGP1	182.101	4.35349	0.450407	9.66569	20.4423	4.22e-22	1.3e-20	5016	protein_coding	HGNC Symbol	3	oviductal glycoprotein 1 [Source:HGNC Symbol;Acc:HGNC:8524]	0.338273	0.540203	0.42752	1.12196	0.847124	0.715399	2.47216	6.38256	5.32094
ENSG00000178171	AMER3	2.26392	4.35601	1.93953	2.24591	20.4781	0.0247097	0.0487135	205147	protein_coding	HGNC Symbol	4	APC membrane recruitment protein 3 [Source:HGNC Symbol;Acc:HGNC:26771]	0	0.0163698	0	0.0311655	0	0.02044	0.0395546	0.0878334	0.0509181
ENSG00000112394	SLC16A10	15.6065	4.36098	1.11495	3.91135	20.5487	9.18e-05	0.000318331	117247	protein_coding	HGNC Symbol	6	solute carrier family 16 member 10 [Source:HGNC Symbol;Acc:HGNC:17027]	0.015376	0.0982187	0	0.17141	0.185308	0.24528	0.138441	0.702667	0.356426
ENSG00000080573	COL5A3	7.85075	4.36249	1.28364	3.39852	20.5703	0.00067751	0.00197459	50509	protein_coding	HGNC Symbol	2	collagen type V alpha 3 chain [Source:HGNC Symbol;Acc:HGNC:14864]	0	0	0.0518206	0.0311655	0.10589	0.0817598	0.138441	0.175667	0.305508
ENSG00000049249	TNFRSF9	76.555	4.36331	0.635803	6.86267	20.582	6.76e-12	6.95e-11	3604	protein_coding	HGNC Symbol	4	TNF receptor superfamily member 9 [Source:HGNC Symbol;Acc:HGNC:11924]	0.246017	0.196437	0.116596	0.545396	0	0.1022	5.10254	0.731945	1.09474
ENSG00000070729	CNGB1	4.17986	4.37598	1.51076	2.89653	20.7635	0.00377312	0.0093031	1258	protein_coding	HGNC Symbol	9	cyclic nucleotide gated channel beta 1 [Source:HGNC Symbol;Acc:HGNC:2151]	0.015376	0.0163698	0	0.545396	0.185308	0.24528	0.197773	0.0585556	0.101836
ENSG00000117983	MUC5B	18.9687	4.38591	0.780767	5.61744	20.907	1.94e-08	1.28e-07	727897	protein_coding	HGNC Symbol	5	mucin 5B, oligomeric mucus/gel-forming [Source:HGNC Symbol;Acc:HGNC:7516]	0.0922563	0.0327396	0.0129552	0.373986	0.330908	0.265719	0.593319	0.351334	0.611017
ENSG00000181291	TMEM132E	4.14485	4.42278	1.74821	2.52989	21.4481	0.0114098	0.0248366	124842	protein_coding	HGNC Symbol	3	transmembrane protein 132E [Source:HGNC Symbol;Acc:HGNC:26991]	0	0	0.0259103	0.155828	0.330908	0.16352	0.0197773	0.117111	0.178213
ENSG00000154153	RETREG1	95.395	4.43726	0.494495	8.97332	21.6644	2.88e-19	7.01e-18	54463	protein_coding	HGNC Symbol	6	reticulophagy regulator 1 [Source:HGNC Symbol;Acc:HGNC:25964]	0.15376	0.376505	0.129552	4.08268	2.43548	2.49368	4.54878	2.19583	1.47662
ENSG00000110925	CSRNP2	16623.3	4.44923	0.352189	12.6331	21.845	1.39e-36	1.37e-34	81566	protein_coding	HGNC Symbol	8	cysteine and serine rich nuclear protein 2 [Source:HGNC Symbol;Acc:HGNC:16006]	40.0546	36.7502	35.9247	86.235	86.2742	95.4955	230.663	499.04	568.093
ENSG00000143119	CD53	6.42312	4.46193	1.36785	3.262	22.0381	0.00110628	0.00306646	963	protein_coding	HGNC Symbol	6	CD53 molecule [Source:HGNC Symbol;Acc:HGNC:1686]	0.015376	0	0.0259103	0	0.0529452	0	0.118664	0.0585556	0.330967
ENSG00000174567	GOLT1A	8.73071	4.50147	1.09004	4.12965	22.6506	3.63e-05	0.000136005	127845	protein_coding	HGNC Symbol	2	golgi transport 1A [Source:HGNC Symbol;Acc:HGNC:24766]	0.0307521	0	0.0259103	0.0311655	0.0794178	0.0408799	0.395546	0.175667	0.178213
ENSG00000137473	TTC29	38.3086	4.52021	0.558689	8.09075	22.9467	5.93e-16	9.98e-15	83894	protein_coding	HGNC Symbol	9	tetratricopeptide repeat domain 29 [Source:HGNC Symbol;Acc:HGNC:29936]	0.107632	0.0654791	0.077731	0.4519	0.291199	0.0817598	1.7404	0.731945	0.814689
ENSG00000143458	GABPB2	3427.85	4.53392	0.328862	13.7867	23.1658	3.06e-43	4.42e-41	126626	protein_coding	HGNC Symbol	6	GA binding protein transcription factor subunit beta 2 [Source:HGNC Symbol;Acc:HGNC:28441]	7.79565	7.39914	6.77555	43.1175	35.7116	45.5607	53.5372	103.38	112.809
ENSG00000060718	COL11A1	8.70014	4.53582	1.22954	3.68905	23.1963	0.00022509	0.000721007	1301	protein_coding	HGNC Symbol	14	collagen type XI alpha 1 chain [Source:HGNC Symbol;Acc:HGNC:2186]	0	0	0.0518206	0.109079	0.0794178	0.14308	0.336214	0.117111	0.280049
ENSG00000181786	ACTL9	4.84318	4.54093	1.47209	3.08469	23.2786	0.00203763	0.00533021	284382	protein_coding	HGNC Symbol	2	actin like 9 [Source:HGNC Symbol;Acc:HGNC:28494]	0.015376	0.0163698	0	0.0467483	0.0264726	0.0408799	0.0791092	0.175667	0.127295
ENSG00000164082	GRM2	51.4101	4.545	0.713861	6.36679	23.3443	1.93e-10	1.65e-09	2912	protein_coding	HGNC Symbol	8	glutamate metabotropic receptor 2 [Source:HGNC Symbol;Acc:HGNC:4594]	0.138384	0.196437	0	0.389569	0.172072	0.18396	1.3053	0.995445	1.85851
ENSG00000163806	SPDYA	47.7913	4.55272	0.645658	7.05128	23.4696	1.77e-12	1.96e-11	245711	protein_coding	HGNC Symbol	7	speedy/RINGO cell cycle regulator family member A [Source:HGNC Symbol;Acc:HGNC:30613]	0.015376	0.180068	0.103641	0.264907	0.370617	0.16352	0.870201	1.52245	1.40025
ENSG00000156920	ADGRG4	16.5884	4.56697	0.836458	5.45989	23.7025	4.76e-08	2.95e-07	139378	protein_coding	HGNC Symbol	3	adhesion G protein-coupled receptor G4 [Source:HGNC Symbol;Acc:HGNC:18992]	0	0.0654791	0.0388655	0.124662	0.172072	0.0408799	0.632874	0.380611	0.381885
ENSG00000143355	LHX9	7.61684	4.5916	1.29489	3.54595	24.1107	0.000391198	0.0011935	56956	protein_coding	HGNC Symbol	8	LIM homeobox 9 [Source:HGNC Symbol;Acc:HGNC:14222]	0	0.0491093	0	0.140245	0.0529452	0.0408799	0.237328	0.2635	0.127295
ENSG00000143627	PKLR	4.80836	4.5927	1.56218	2.93992	24.129	0.00328294	0.00822788	5313	protein_coding	HGNC Symbol	3	pyruvate kinase L/R [Source:HGNC Symbol;Acc:HGNC:9020]	0.0307521	0	0	0.0311655	0.0264726	0	0.177996	0.175667	0.0509181
ENSG00000068976	PYGM	50.6659	4.59836	0.540773	8.50329	24.2238	1.84e-17	3.55e-16	5837	protein_coding	HGNC Symbol	5	glycogen phosphorylase, muscle associated [Source:HGNC Symbol;Acc:HGNC:9726]	0.138384	0.0654791	0.103641	0.155828	0.370617	0.14308	0.969088	1.69811	1.37479
ENSG00000183273	CCDC60	4.92439	4.61022	1.69959	2.71255	24.4239	0.00667681	0.0154426	160777	protein_coding	HGNC Symbol	5	coiled-coil domain containing 60 [Source:HGNC Symbol;Acc:HGNC:28610]	0.0307521	0	0	0.0311655	0.10589	0	0.0395546	0.0585556	0.280049
ENSG00000179913	B3GNT3	9.72399	4.61391	1.0679	4.32054	24.4865	1.56e-05	6.32e-05	10331	protein_coding	HGNC Symbol	4	UDP-GlcNAc:betaGal beta-1,3-N-acetylglucosaminyltransferase 3 [Source:HGNC Symbol;Acc:HGNC:13528]	0	0.0327396	0.0259103	0.997296	1.2045	0.510999	0.375769	0.292778	0.152754
ENSG00000099822	HCN2	1897.72	4.61812	0.416639	11.0842	24.558	1.5e-28	8.3e-27	610	protein_coding	HGNC Symbol	1	hyperpolarization activated cyclic nucleotide gated potassium and sodium channel 2 [Source:HGNC Symbol;Acc:HGNC:4846]	1.62986	4.99278	4.74159	277.498	236.4	310.033	34.5312	57.648	58.6831
ENSG00000163376	KBTBD8	645.4	4.6542	0.305946	15.2125	25.18	2.92e-52	6e-50	84541	protein_coding	HGNC Symbol	5	kelch repeat and BTB domain containing 8 [Source:HGNC Symbol;Acc:HGNC:30691]	1.55298	0.916708	1.34734	8.1342	7.31968	7.74675	13.2508	20.4652	18.025
ENSG00000166426	CRABP1	4.86898	4.66724	1.55559	3.0003	25.4085	0.00269716	0.00687943	1381	protein_coding	HGNC Symbol	3	cellular retinoic acid binding protein 1 [Source:HGNC Symbol;Acc:HGNC:2338]	0	0	0.0259103	0.0311655	0.0264726	0.02044	0.0988865	0.0878334	0.203672
ENSG00000154736	ADAMTS5	5.27815	4.68569	1.70754	2.74412	25.7356	0.00606738	0.0141687	11096	protein_coding	HGNC Symbol	2	ADAM metallopeptidase with thrombospondin type 1 motif 5 [Source:HGNC Symbol;Acc:HGNC:221]	0	0.0327396	0	3.5217	1.89279	0.592759	0.415323	0.0292778	0.0509181
ENSG00000089693	MLF2	90842.7	4.71852	0.341718	13.8082	26.3279	2.27e-43	3.46e-41	8079	protein_coding	HGNC Symbol	11	myeloid leukemia factor 2 [Source:HGNC Symbol;Acc:HGNC:7126]	173.749	166.317	174.441	1510.05	1265.74	1432.9	1314.66	2862.7	2980.49
ENSG00000056487	PHF21B	20.961	4.72651	0.728399	6.4889	26.4741	8.65e-11	7.73e-10	112885	protein_coding	HGNC Symbol	12	PHD finger protein 21B [Source:HGNC Symbol;Acc:HGNC:25161]	0.015376	0.0491093	0.0518206	0.0934965	0.0397089	0.12264	0.672428	0.585556	0.483722
ENSG00000131480	AOC2	241.106	4.72835	0.421655	11.2138	26.5078	3.49e-29	2.02e-27	314	protein_coding	HGNC Symbol	2	amine oxidase, copper containing 2 [Source:HGNC Symbol;Acc:HGNC:549]	0.338273	0.474724	0.531162	2.04134	0.992723	0.981118	3.77747	9.1054	6.212
ENSG00000118004	COLEC11	15.8641	4.73122	1.02077	4.63493	26.5607	3.57e-06	1.62e-05	78989	protein_coding	HGNC Symbol	13	collectin subfamily member 11 [Source:HGNC Symbol;Acc:HGNC:17213]	0.0922563	0	0	0.062331	0.158836	0.1022	0.435101	0.380611	0.483722
ENSG00000180914	OXTR	55.3354	4.73485	0.488488	9.69288	26.6276	3.23e-22	1.01e-20	5021	protein_coding	HGNC Symbol	4	oxytocin receptor [Source:HGNC Symbol;Acc:HGNC:8529]	0.0922563	0.0818489	0.129552	0.950548	1.25745	1.2264	1.34486	1.72739	1.42571
ENSG00000158296	SLC13A3	56.3863	4.75434	0.469033	10.1365	26.9897	3.81e-24	1.46e-22	64849	protein_coding	HGNC Symbol	11	solute carrier family 13 member 3 [Source:HGNC Symbol;Acc:HGNC:14430]	0.15376	0.0818489	0.077731	1.02846	1.13832	0.817598	1.60196	1.61028	1.42571
ENSG00000122224	LY9	12.6158	4.77433	1.15674	4.1274	27.3664	3.67e-05	0.000137151	4063	protein_coding	HGNC Symbol	11	lymphocyte antigen 9 [Source:HGNC Symbol;Acc:HGNC:6730]	0	0	0.0647758	0.0934965	0.0397089	0	0.692206	0.146389	0.280049
ENSG00000143340	FAM163A	10.3437	4.78845	1.216	3.93787	27.6354	8.22e-05	0.000287557	148753	protein_coding	HGNC Symbol	1	family with sequence similarity 163 member A [Source:HGNC Symbol;Acc:HGNC:28274]	0	0	0.0518206	0.483065	0.10589	0.12264	0.435101	0.351334	0.101836
ENSG00000076641	PAG1	27.8772	4.79915	0.795144	6.03557	27.8411	1.58e-09	1.2e-08	55824	protein_coding	HGNC Symbol	4	phosphoprotein membrane anchor with glycosphingolipid microdomains 1 [Source:HGNC Symbol;Acc:HGNC:30043]	0.0307521	0.0654791	0.0518206	4.02035	4.71213	3.06599	0.355991	0.556278	1.27295
ENSG00000166863	TAC3	5.26354	4.80349	1.91648	2.50641	27.9251	0.0121965	0.0263051	6866	protein_coding	HGNC Symbol	11	tachykinin 3 [Source:HGNC Symbol;Acc:HGNC:11521]	0	0	0.0259103	0	0.0264726	0.02044	0	0.117111	0.280049
ENSG00000137860	SLC28A2	10.65	4.81022	1.21952	3.94434	28.0556	8e-05	0.000280971	9153	protein_coding	HGNC Symbol	4	solute carrier family 28 member 2 [Source:HGNC Symbol;Acc:HGNC:11002]	0	0	0.0518206	0.140245	0.0661815	0.12264	0.138441	0.292778	0.407345
ENSG00000184613	NELL2	17.3083	4.84157	1.02984	4.70127	28.6719	2.59e-06	1.21e-05	4753	protein_coding	HGNC Symbol	20	neural EGFL like 2 [Source:HGNC Symbol;Acc:HGNC:7751]	0.0307521	0.0327396	0.0259103	0.28049	0.476507	0.286159	0.0791092	0.585556	0.661935
ENSG00000184313	MROH7	3.0991	4.84387	1.77591	2.72754	28.7178	0.00638078	0.0148373	374977	protein_coding	HGNC Symbol	13	maestro heat like repeat family member 7 [Source:HGNC Symbol;Acc:HGNC:24802]	0.015376	0	0	0.0311655	0.158836	0.0817598	0.0593319	0.0878334	0.101836
ENSG00000182771	GRID1	15.2716	4.8507	1.07899	4.49558	28.854	6.94e-06	3.01e-05	2894	protein_coding	HGNC Symbol	3	glutamate ionotropic receptor delta type subunit 1 [Source:HGNC Symbol;Acc:HGNC:4575]	0	0.0818489	0	0.0934965	0.119127	0.429239	0.316437	0.556278	0.356426
ENSG00000164185	ZNF474	11.407	4.86844	1.04628	4.65309	29.211	3.27e-06	1.49e-05	133923	protein_coding	HGNC Symbol	3	zinc finger protein 474 [Source:HGNC Symbol;Acc:HGNC:23245]	0.0307521	0	0.0259103	0.062331	0.0926541	0.12264	0.257105	0.234222	0.432804
ENSG00000154319	FAM167A	45.8132	4.86911	0.523805	9.29565	29.2246	1.46e-20	4.07e-19	83648	protein_coding	HGNC Symbol	8	family with sequence similarity 167 member A [Source:HGNC Symbol;Acc:HGNC:15549]	0.123008	0.0327396	0.077731	2.50882	0.767706	1.30816	1.50308	1.22967	1.09474
ENSG00000002746	HECW1	3.17988	4.88606	1.83529	2.66228	29.5699	0.00776134	0.017638	23072	protein_coding	HGNC Symbol	11	HECT, C2 and WW domain containing E3 ubiquitin protein ligase 1 [Source:HGNC Symbol;Acc:HGNC:22195]	0	0	0.0129552	0.062331	0.0661815	0	0.0395546	0.0585556	0.152754
ENSG00000143217	NECTIN4	14.6116	4.88625	0.973329	5.02014	29.5739	5.16e-07	2.72e-06	81607	protein_coding	HGNC Symbol	2	nectin cell adhesion molecule 4 [Source:HGNC Symbol;Acc:HGNC:19688]	0	0.0327396	0.0388655	0.327238	0.185308	0.14308	0.29666	0.292778	0.585558
ENSG00000111981	ULBP1	1615.49	4.90003	0.255707	19.1627	29.8578	7.58e-82	3.46e-79	80329	protein_coding	HGNC Symbol	1	UL16 binding protein 1 [Source:HGNC Symbol;Acc:HGNC:14893]	4.0439	1.96437	2.16351	37.4298	20.4766	16.5564	49.8388	41.1939	43.1531
ENSG00000174827	PDZK1	38.5945	4.90127	0.593776	8.25442	29.8834	1.53e-16	2.7e-15	5174	protein_coding	HGNC Symbol	7	PDZ domain containing 1 [Source:HGNC Symbol;Acc:HGNC:8821]	0.0307521	0.0818489	0.077731	0.342821	0.344144	0.0408799	0.909756	1.08328	1.14566
ENSG00000073282	TP63	5.81765	4.91815	1.62584	3.02499	30.235	0.00248638	0.00639945	8626	protein_coding	HGNC Symbol	14	tumor protein p63 [Source:HGNC Symbol;Acc:HGNC:15979]	0.0307521	0	0	0.062331	0.0794178	0.12264	0.435101	0.0585556	0.0509181
ENSG00000166866	MYO1A	9.31162	4.93593	1.16791	4.22631	30.61	2.38e-05	9.3e-05	4640	protein_coding	HGNC Symbol	9	myosin IA [Source:HGNC Symbol;Acc:HGNC:7595]	0	0.0327396	0.0129552	0	0.0397089	0.02044	0.177996	0.2635	0.305508
ENSG00000182326	C1S	109.272	4.9554	0.374247	13.241	31.026	5.09e-40	6.33e-38	716	protein_coding	HGNC Symbol	21	complement C1s [Source:HGNC Symbol;Acc:HGNC:1247]	0.107632	0.163698	0.246148	2.7114	0.60887	0.878918	3.34236	3.04489	2.69866
ENSG00000117013	KCNQ4	30.5219	4.95616	0.793029	6.24966	31.0422	4.11e-10	3.37e-09	9132	protein_coding	HGNC Symbol	5	potassium voltage-gated channel subfamily Q member 4 [Source:HGNC Symbol;Acc:HGNC:6298]	0	0.0654791	0.077731	0.124662	0.185308	0.12264	0.553765	0.614834	1.27295
ENSG00000048052	HDAC9	618.34	4.96044	0.413372	12	31.1345	3.55e-33	2.65e-31	9734	protein_coding	HGNC Symbol	29	histone deacetylase 9 [Source:HGNC Symbol;Acc:HGNC:14065]	0.830306	0.965817	1.16596	2.7114	2.17075	1.57388	8.02959	22.7488	18.025
ENSG00000175697	GPR156	45.1291	4.97085	0.65845	7.54932	31.36	4.38e-14	6.01e-13	165829	protein_coding	HGNC Symbol	5	G protein-coupled receptor 156 [Source:HGNC Symbol;Acc:HGNC:20844]	0.0922563	0	0.116596	0.342821	0.397089	0.592759	1.00864	1.66883	0.992902
ENSG00000075223	SEMA3C	45.3692	4.97709	0.860513	5.78386	31.4958	7.3e-09	5.08e-08	10512	protein_coding	HGNC Symbol	9	semaphorin 3C [Source:HGNC Symbol;Acc:HGNC:10725]	0	0.0654791	0.142507	6.57592	4.4474	3.49523	0.375769	1.75667	1.40025
ENSG00000118503	TNFAIP3	2932.95	4.98566	0.317485	15.7036	31.6835	1.43e-55	3.17e-53	7128	protein_coding	HGNC Symbol	11	TNF alpha induced protein 3 [Source:HGNC Symbol;Acc:HGNC:11896]	7.27287	3.48676	3.27766	36.0897	9.98018	10.4653	131.638	61.1028	61.2035
ENSG00000058866	DGKG	6.46369	4.98993	1.47764	3.37697	31.7775	0.000732883	0.00211496	1608	protein_coding	HGNC Symbol	11	diacylglycerol kinase gamma [Source:HGNC Symbol;Acc:HGNC:2853]	0	0.0327396	0	0.109079	0.132363	0.0408799	0.29666	0.0585556	0.203672
ENSG00000006283	CACNA1G	35.9955	4.99539	0.755754	6.6098	31.8979	3.85e-11	3.58e-10	8913	protein_coding	HGNC Symbol	34	calcium voltage-gated channel subunit alpha1 G [Source:HGNC Symbol;Acc:HGNC:1394]	0.0615042	0.0982187	0.0129552	1.19987	0.833887	1.00156	0.474655	1.37606	0.992902
ENSG00000061455	PRDM6	24.9309	5.00662	0.8943	5.59836	32.1471	2.16e-08	1.41e-07	93166	protein_coding	HGNC Symbol	4	PR/SET domain 6 [Source:HGNC Symbol;Acc:HGNC:9350]	0	0.0327396	0.077731	0.638893	0.450034	0.347479	0.29666	0.878334	0.78923
ENSG00000180245	RRH	12.2467	5.01775	1.20065	4.17919	32.3961	2.93e-05	0.000111829	10692	protein_coding	HGNC Symbol	3	retinal pigment epithelium-derived rhodopsin homolog [Source:HGNC Symbol;Acc:HGNC:10450]	0	0	0.0518206	0.373986	0.211781	0.0408799	0.257105	0.585556	0.152754
ENSG00000143199	ADCY10	16.6687	5.03304	0.963099	5.22588	32.7414	1.73e-07	9.87e-07	55811	protein_coding	HGNC Symbol	5	adenylate cyclase 10 [Source:HGNC Symbol;Acc:HGNC:21285]	0.0461281	0.0327396	0	0.186993	0.291199	0.18396	0.257105	0.585556	0.483722
ENSG00000118271	TTR	3.51736	5.04669	1.70634	2.95762	33.0526	0.00310028	0.00781131	7276	protein_coding	HGNC Symbol	6	transthyretin [Source:HGNC Symbol;Acc:HGNC:12405]	0	0	0.0129552	0	0.0264726	0.0408799	0.0988865	0.117111	0.0763771
ENSG00000096088	PGC	1.78387	5.05838	2.2015	2.29769	33.3214	0.0215794	0.0432272	5225	protein_coding	HGNC Symbol	4	progastricsin [Source:HGNC Symbol;Acc:HGNC:8890]	0	0	0	0.0779138	0	0.02044	0.0395546	0.0585556	0.0509181
ENSG00000119508	NR4A3	148.746	5.0717	0.366273	13.8468	33.6305	1.33e-43	2.06e-41	8013	protein_coding	HGNC Symbol	4	nuclear receptor subfamily 4 group A member 3 [Source:HGNC Symbol;Acc:HGNC:7982]	0.184513	0.278286	0.207283	2.6179	1.97221	1.49212	6.54629	3.36695	2.95325
ENSG00000055732	MCOLN3	6.69557	5.09071	1.39053	3.66099	34.0767	0.000251247	0.000795793	55283	protein_coding	HGNC Symbol	6	mucolipin 3 [Source:HGNC Symbol;Acc:HGNC:13358]	0.0307521	0	0	0.062331	0.10589	0	0.237328	0.175667	0.152754
ENSG00000137204	SLC22A7	1.79603	5.10241	2.20643	2.31252	34.3542	0.020749	0.0418188	10864	protein_coding	HGNC Symbol	9	solute carrier family 22 member 7 [Source:HGNC Symbol;Acc:HGNC:10971]	0	0	0	0.0155828	0.0264726	0	0.0791092	0.0292778	0.0509181
ENSG00000179148	ALOXE3	47.0421	5.13224	0.817758	6.27599	35.0718	3.47e-10	2.87e-09	59344	protein_coding	HGNC Symbol	4	arachidonate lipoxygenase 3 [Source:HGNC Symbol;Acc:HGNC:13743]	0.0461281	0.0327396	0.116596	4.00477	2.84581	2.98423	0.316437	2.22511	1.1202
ENSG00000178199	ZC3H12D	26.7878	5.13324	0.830851	6.17829	35.0962	6.48e-10	5.13e-09	340152	protein_coding	HGNC Symbol	5	zinc finger CCCH-type containing 12D [Source:HGNC Symbol;Acc:HGNC:21175]	0.0307521	0	0.077731	0.0311655	0.211781	0.0408799	0.454878	0.673389	1.01836
ENSG00000167880	EVPL	18.0231	5.13665	0.960064	5.35032	35.1793	8.78e-08	5.24e-07	2125	protein_coding	HGNC Symbol	5	envoplakin [Source:HGNC Symbol;Acc:HGNC:3503]	0.015376	0.0654791	0	0.202576	0.132363	0.18396	0.435101	0.322056	0.712853
ENSG00000141946	ZIM3	1.91944	5.15311	2.22643	2.31451	35.5828	0.0206397	0.0416087	114026	protein_coding	HGNC Symbol	1	zinc finger imprinted 3 [Source:HGNC Symbol;Acc:HGNC:16366]	0	0	0	0	0	0.02044	0.0197773	0.0585556	0.0763771
ENSG00000005471	ABCB4	10.6565	5.15532	1.10438	4.66807	35.6373	3.04e-06	1.4e-05	5244	protein_coding	HGNC Symbol	13	ATP binding cassette subfamily B member 4 [Source:HGNC Symbol;Acc:HGNC:45]	0	0.0327396	0.0129552	0.747972	0.264726	0.16352	0.316437	0.2635	0.305508
ENSG00000165556	CDX2	6.98002	5.22107	1.42057	3.67533	37.299	0.000237539	0.000756518	1045	protein_coding	HGNC Symbol	2	caudal type homeobox 2 [Source:HGNC Symbol;Acc:HGNC:1806]	0	0	0.0259103	0	0	0	0.336214	0.175667	0.101836
ENSG00000184144	CNTN2	4.05966	5.23869	1.81156	2.89182	37.7575	0.00383022	0.00944106	6900	protein_coding	HGNC Symbol	33	contactin 2 [Source:HGNC Symbol;Acc:HGNC:2172]	0	0	0.0129552	0.124662	0.0397089	0.0817598	0.0197773	0.117111	0.178213
ENSG00000069188	SDK2	4.01555	5.24247	1.65384	3.16987	37.8565	0.00152508	0.00410672	54549	protein_coding	HGNC Symbol	5	sidekick cell adhesion molecule 2 [Source:HGNC Symbol;Acc:HGNC:19308]	0	0.0163698	0	0.358403	0.198545	0.306599	0.118664	0.0878334	0.127295
ENSG00000166558	SLC38A8	2.02039	5.24272	2.15407	2.43387	37.863	0.0149385	0.0314266	146167	protein_coding	HGNC Symbol	4	solute carrier family 38 member 8 [Source:HGNC Symbol;Acc:HGNC:32434]	0	0	0	0.0934965	0.132363	0.0613199	0.0593319	0.0878334	0.025459
ENSG00000073861	TBX21	4.11621	5.26416	1.69238	3.1105	38.4299	0.00186772	0.00493868	30009	protein_coding	HGNC Symbol	2	T-box 21 [Source:HGNC Symbol;Acc:HGNC:11599]	0	0	0.0129552	0.0467483	0	0.02044	0.0593319	0.117111	0.152754
ENSG00000166920	C15orf48	4.07211	5.27683	1.64638	3.20511	38.7689	0.00135009	0.00369363	84419	protein_coding	HGNC Symbol	4	chromosome 15 open reading frame 48 [Source:HGNC Symbol;Acc:HGNC:29898]	0	0.0163698	0	0.0311655	0	0	0.158218	0.0878334	0.101836
ENSG00000163624	CDS1	7.6762	5.28537	1.36664	3.8674	38.999	0.000110001	0.000376118	1040	protein_coding	HGNC Symbol	2	CDP-diacylglycerol synthase 1 [Source:HGNC Symbol;Acc:HGNC:1800]	0.015376	0	0.0129552	0.124662	0.0529452	0.02044	0.118664	0.292778	0.203672
ENSG00000176601	MAP3K19	7.46337	5.29195	1.38453	3.8222	39.1774	0.000132265	0.00044502	80122	protein_coding	HGNC Symbol	14	mitogen-activated protein kinase kinase kinase 19 [Source:HGNC Symbol;Acc:HGNC:26249]	0	0	0.0259103	0.109079	0.119127	0.0408799	0.237328	0.2635	0.127295
ENSG00000121853	GHSR	2.11157	5.30043	2.09958	2.52452	39.4084	0.0115857	0.0251662	2693	protein_coding	HGNC Symbol	2	growth hormone secretagogue receptor [Source:HGNC Symbol;Acc:HGNC:4267]	0	0	0	0	0	0	0.0395546	0.0585556	0.0763771
ENSG00000070886	EPHA8	11.6697	5.30371	1.14106	4.64805	39.498	3.35e-06	1.53e-05	2046	protein_coding	HGNC Symbol	2	EPH receptor A8 [Source:HGNC Symbol;Acc:HGNC:3391]	0.0461281	0	0	0.140245	0.0264726	0.0817598	0.316437	0.292778	0.356426
ENSG00000184678	HIST2H2BE	1858.29	5.31021	0.244393	21.7282	39.6765	1.11e-104	7.02e-102	8349	protein_coding	HGNC Symbol	1	histone cluster 2 H2B family member e [Source:HGNC Symbol;Acc:HGNC:4760]	3.29047	2.02985	1.80077	1.88551	1.95897	1.022	50.2541	51.9681	51.58
ENSG00000130287	NCAN	20.1515	5.3325	0.849028	6.28071	40.2941	3.37e-10	2.78e-09	1463	protein_coding	HGNC Symbol	4	neurocan [Source:HGNC Symbol;Acc:HGNC:2465]	0.015376	0.0491093	0.0129552	0.124662	0.0529452	0.0408799	0.51421	0.585556	0.560099
ENSG00000135744	AGT	2.16813	5.36032	2.05113	2.61335	41.0786	0.00896604	0.0200158	183	protein_coding	HGNC Symbol	1	angiotensinogen [Source:HGNC Symbol;Acc:HGNC:333]	0	0	0	0	0.0132363	0	0.0791092	0.0585556	0.0509181
ENSG00000086159	AQP6	16.1459	5.36244	0.983506	5.45237	41.1392	4.97e-08	3.07e-07	363	protein_coding	HGNC Symbol	5	aquaporin 6 [Source:HGNC Symbol;Acc:HGNC:639]	0.0461281	0	0.0129552	0.0467483	0.119127	0	0.336214	0.468445	0.509181
ENSG00000055957	ITIH1	4.47883	5.39536	1.64381	3.28222	42.0885	0.00102993	0.0028791	3697	protein_coding	HGNC Symbol	12	inter-alpha-trypsin inhibitor heavy chain 1 [Source:HGNC Symbol;Acc:HGNC:6166]	0	0.0163698	0	0	0.0132363	0	0.0988865	0.0878334	0.178213
ENSG00000164093	PITX2	161.169	5.40251	0.427614	12.6341	42.2978	1.37e-36	1.37e-34	5308	protein_coding	HGNC Symbol	16	paired like homeodomain 2 [Source:HGNC Symbol;Acc:HGNC:9005]	0.215265	0.163698	0.194327	1.30895	0.807415	0.776719	2.9666	4.45023	5.60099
ENSG00000163362	INAVA	8.49951	5.42375	1.35367	4.00671	42.9251	6.16e-05	0.000220145	55765	protein_coding	HGNC Symbol	7	innate immunity activator [Source:HGNC Symbol;Acc:HGNC:25599]	0.0307521	0	0	0.0155828	0.0132363	0.0408799	0.197773	0.322056	0.178213
ENSG00000142224	IL19	2.26908	5.43343	2.41649	2.24848	43.2141	0.0245459	0.0484371	29949	protein_coding	HGNC Symbol	4	interleukin 19 [Source:HGNC Symbol;Acc:HGNC:5990]	0	0	0	0	0	0	0.118664	0.0878334	0
ENSG00000176635	HORMAD2	2.3037	5.43543	2.0204	2.69027	43.274	0.00713939	0.0163879	150280	protein_coding	HGNC Symbol	4	HORMA domain containing 2 [Source:HGNC Symbol;Acc:HGNC:28383]	0	0	0	0.0311655	0	0	0.0593319	0.0585556	0.0763771
ENSG00000178789	CD300LB	4.63366	5.44001	1.6486	3.29978	43.4115	0.000967619	0.00272346	124599	protein_coding	HGNC Symbol	2	CD300 molecule like family member b [Source:HGNC Symbol;Acc:HGNC:30811]	0	0	0.0129552	0.0155828	0	0	0.0988865	0.204945	0.0763771
ENSG00000136931	NR5A1	4.63605	5.4443	1.64073	3.31822	43.5408	0.000905916	0.0025665	2516	protein_coding	HGNC Symbol	4	nuclear receptor subfamily 5 group A member 1 [Source:HGNC Symbol;Acc:HGNC:7983]	0	0	0.0129552	0.062331	0.0264726	0.0817598	0.0791092	0.117111	0.178213
ENSG00000164404	GDF9	52.3835	5.44475	0.630273	8.63871	43.5544	5.68e-18	1.16e-16	2661	protein_coding	HGNC Symbol	7	growth differentiation factor 9 [Source:HGNC Symbol;Acc:HGNC:4224]	0.0615042	0.0982187	0.0259103	0.4519	0.291199	0.1022	0.949311	1.52245	1.75667
ENSG00000143536	CRNN	2.3481	5.45685	2.01676	2.70575	43.9214	0.00681507	0.0157358	49860	protein_coding	HGNC Symbol	1	cornulin [Source:HGNC Symbol;Acc:HGNC:1230]	0	0	0	0.311655	0.264726	0.286159	0.0593319	0.0878334	0.0509181
ENSG00000154914	USP43	8.73842	5.467	1.33336	4.10018	44.2315	4.13e-05	0.000152795	124739	protein_coding	HGNC Symbol	6	ubiquitin specific peptidase 43 [Source:HGNC Symbol;Acc:HGNC:20072]	0.0307521	0	0	0.0155828	0.0264726	0.1022	0.197773	0.2635	0.25459
ENSG00000157851	DPYSL5	13.446	5.48834	1.10596	4.9625	44.8904	6.96e-07	3.59e-06	56896	protein_coding	HGNC Symbol	7	dihydropyrimidinase like 5 [Source:HGNC Symbol;Acc:HGNC:20637]	0	0.0327396	0.0129552	0.202576	0.185308	0.16352	0.257105	0.322056	0.509181
ENSG00000163749	CCDC158	2.39488	5.48854	2.10682	2.60513	44.8969	0.00918389	0.020441	339965	protein_coding	HGNC Symbol	5	coiled-coil domain containing 158 [Source:HGNC Symbol;Acc:HGNC:26374]	0	0	0	0.0311655	0	0.0613199	0.0395546	0.0292778	0.127295
ENSG00000120471	TP53AIP1	4.80415	5.49311	1.60385	3.42496	45.0392	0.000614899	0.00180524	63970	protein_coding	HGNC Symbol	6	tumor protein p53 regulated apoptosis inducing protein 1 [Source:HGNC Symbol;Acc:HGNC:29984]	0	0.0163698	0	0	0	0.0408799	0.118664	0.175667	0.101836
ENSG00000091181	IL5RA	2.43928	5.50814	2.03114	2.71185	45.511	0.00669081	0.0154706	3568	protein_coding	HGNC Symbol	11	interleukin 5 receptor subunit alpha [Source:HGNC Symbol;Acc:HGNC:6017]	0	0	0	0.0155828	0.0132363	0	0.0395546	0.0585556	0.101836
ENSG00000182348	ZNF804B	2.40465	5.51057	2.0443	2.69558	45.5875	0.00702671	0.0161473	219578	protein_coding	HGNC Symbol	2	zinc finger protein 804B [Source:HGNC Symbol;Acc:HGNC:21958]	0	0	0	0.218159	0.0926541	0.16352	0.0988865	0.0878334	0.025459
ENSG00000117601	SERPINC1	22.2314	5.51157	0.935238	5.89322	45.6191	3.79e-09	2.73e-08	462	protein_coding	HGNC Symbol	4	serpin family C member 1 [Source:HGNC Symbol;Acc:HGNC:775]	0.0461281	0	0.0259103	0.420734	0.423562	0.449679	0.316437	0.878334	0.585558
ENSG00000111249	CUX2	41.3246	5.51905	0.71445	7.72489	45.8565	1.12e-14	1.63e-13	23316	protein_coding	HGNC Symbol	3	cut like homeobox 2 [Source:HGNC Symbol;Acc:HGNC:19347]	0.0307521	0.0818489	0.0259103	0.342821	0.211781	0.490559	0.672428	1.17111	1.47662
ENSG00000163347	CLDN1	596.013	5.53129	1.08586	5.09393	46.2471	3.51e-07	1.9e-06	9076	protein_coding	HGNC Symbol	2	claudin 1 [Source:HGNC Symbol;Acc:HGNC:2032]	1.29159	0.360135	0.336834	4.98648	1.66777	1.533	47.3271	5.24073	4.42987
ENSG00000117154	IGSF21	2.45144	5.53909	2.03138	2.72676	46.4978	0.00639593	0.0148557	84966	protein_coding	HGNC Symbol	4	immunoglobin superfamily member 21 [Source:HGNC Symbol;Acc:HGNC:28246]	0	0	0	0	0.0132363	0.02044	0.0791092	0.0292778	0.101836
ENSG00000157703	SVOPL	4.82827	5.54652	1.60932	3.4465	46.7378	0.000567909	0.00167497	136306	protein_coding	HGNC Symbol	7	SVOP like [Source:HGNC Symbol;Acc:HGNC:27034]	0.015376	0	0	0.0467483	0.0529452	0.0408799	0.237328	0.0878334	0.101836
ENSG00000154655	L3MBTL4	18.2349	5.55062	0.966574	5.74257	46.8708	9.33e-09	6.41e-08	91133	protein_coding	HGNC Symbol	8	L3MBTL4, histone methyl-lysine binding protein [Source:HGNC Symbol;Acc:HGNC:26677]	0.0307521	0	0.0259103	0.389569	0.450034	0.817598	0.336214	0.556278	0.585558
ENSG00000168079	SCARA5	2.49583	5.55919	1.96352	2.83123	47.15	0.0046369	0.0111811	286133	protein_coding	HGNC Symbol	4	scavenger receptor class A member 5 [Source:HGNC Symbol;Acc:HGNC:28701]	0	0	0	0.0467483	0.0794178	0.02044	0.0791092	0.0585556	0.0763771
ENSG00000178623	GPR35	69.3184	5.56172	0.536414	10.3683	47.233	3.45e-25	1.48e-23	2859	protein_coding	HGNC Symbol	5	G protein-coupled receptor 35 [Source:HGNC Symbol;Acc:HGNC:4492]	0.0768802	0.0654791	0.077731	0.373986	0.344144	0.24528	1.46352	1.90306	2.29131
ENSG00000166569	CPLX4	9.4773	5.57811	1.3054	4.2731	47.7725	1.93e-05	7.67e-05	339302	protein_coding	HGNC Symbol	2	complexin 4 [Source:HGNC Symbol;Acc:HGNC:24330]	0.015376	0.0163698	0	0	0.0264726	0	0.257105	0.146389	0.381885
ENSG00000164175	SLC45A2	2.61686	5.60532	2.42014	2.31611	48.6821	0.020552	0.0414625	51151	protein_coding	HGNC Symbol	5	solute carrier family 45 member 2 [Source:HGNC Symbol;Acc:HGNC:16472]	0	0	0	0	0	0	0.0395546	0.175667	0
ENSG00000007237	GAS7	44.6564	5.64423	0.846067	6.67114	50.0131	2.54e-11	2.4e-10	8522	protein_coding	HGNC Symbol	19	growth arrest specific 7 [Source:HGNC Symbol;Acc:HGNC:4169]	0	0.0818489	0.0518206	1.30895	1.99868	1.24684	0.395546	1.69811	1.42571
ENSG00000176928	GCNT4	5.30923	5.64881	1.70002	3.32279	50.172	0.000891215	0.00252834	51301	protein_coding	HGNC Symbol	2	glucosaminyl (N-acetyl) transferase 4 [Source:HGNC Symbol;Acc:HGNC:17973]	0.015376	0	0	1.37128	0.767706	0.776719	0.158218	0.2635	0.025459
ENSG00000182583	VCX	2.60894	5.65372	2.02978	2.78538	50.3429	0.00534648	0.0126617	26609	protein_coding	HGNC Symbol	3	variable charge X-linked [Source:HGNC Symbol;Acc:HGNC:12667]	0	0	0	0	0	0	0.158218	0.0585556	0.025459
ENSG00000155886	SLC24A2	2.72259	5.67297	2.06136	2.75205	51.0191	0.00592242	0.0138657	25769	protein_coding	HGNC Symbol	2	solute carrier family 24 member 2 [Source:HGNC Symbol;Acc:HGNC:10976]	0	0	0	0.0311655	0.0264726	0.0817598	0.0395546	0.0292778	0.152754
ENSG00000177202	SPACA4	2.68796	5.67314	1.92013	2.95455	51.0253	0.00313122	0.00787986	171169	protein_coding	HGNC Symbol	1	sperm acrosome associated 4 [Source:HGNC Symbol;Acc:HGNC:16441]	0	0	0	0	0.0529452	0	0.0988865	0.0585556	0.0763771
ENSG00000130487	KLHDC7B	2.76698	5.69007	1.98233	2.87039	51.6276	0.00409965	0.0100299	113730	protein_coding	HGNC Symbol	3	kelch domain containing 7B [Source:HGNC Symbol;Acc:HGNC:25145]	0	0	0	0.062331	0.0529452	0.18396	0.0395546	0.0585556	0.127295
ENSG00000178722	C5orf64	2.76698	5.69007	1.98233	2.87039	51.6276	0.00409965	0.0100299	285668	processed_transcript	HGNC Symbol	6	chromosome 5 open reading frame 64 [Source:HGNC Symbol;Acc:HGNC:26744]	0	0	0	0	0.0264726	0	0.0395546	0.0585556	0.127295
ENSG00000092345	DAZL	2.73236	5.69124	1.91807	2.96718	51.6695	0.00300546	0.00759971	1618	protein_coding	HGNC Symbol	3	deleted in azoospermia like [Source:HGNC Symbol;Acc:HGNC:2685]	0	0	0	0	0	0.02044	0.0988865	0.0878334	0.0509181
ENSG00000079215	SLC1A3	5.46434	5.69554	1.93516	2.9432	51.8238	0.00324843	0.00815632	6507	protein_coding	HGNC Symbol	16	solute carrier family 1 member 3 [Source:HGNC Symbol;Acc:HGNC:10941]	0	0.0163698	0	2.89839	3.97089	3.37259	0.0791092	0	0.356426
ENSG00000165548	TMEM63C	25.4807	5.70223	0.851819	6.69417	52.0644	2.17e-11	2.06e-10	57156	protein_coding	HGNC Symbol	8	transmembrane protein 63C [Source:HGNC Symbol;Acc:HGNC:23787]	0.0307521	0.0163698	0.0259103	0.0155828	0.0794178	0.0408799	0.474655	0.702667	0.891066
ENSG00000164393	ADGRF2	2.81138	5.70756	1.95063	2.926	52.2572	0.00343346	0.0085515	222611	protein_coding	HGNC Symbol	4	adhesion G protein-coupled receptor F2 [Source:HGNC Symbol;Acc:HGNC:18991]	0	0	0	0	0	0.0408799	0.0395546	0.0878334	0.101836
ENSG00000120645	IQSEC3	10.5133	5.73068	1.50985	3.79553	53.1014	0.000147328	0.000489484	440073	protein_coding	HGNC Symbol	5	IQ motif and Sec7 domain 3 [Source:HGNC Symbol;Acc:HGNC:29193]	0.0307521	0	0	0.062331	0.185308	0	0.118664	0.644112	0.0763771
ENSG00000112149	CD83	499.128	5.74136	0.243502	23.5783	53.4962	6.44e-123	7.55e-120	9308	protein_coding	HGNC Symbol	2	CD83 molecule [Source:HGNC Symbol;Acc:HGNC:1703]	0.645794	0.392875	0.388655	4.83065	1.86632	1.2264	16.7118	11.8282	13.7733
ENSG00000174792	ODAPH	2.91233	5.76897	1.90151	3.03389	54.5297	0.00241425	0.00623922	152816	protein_coding	HGNC Symbol	5	odontogenesis associated phosphoprotein [Source:HGNC Symbol;Acc:HGNC:26300]	0	0	0	0.0311655	0.0529452	0	0.0791092	0.117111	0.0509181
ENSG00000164287	CDC20B	10.6719	5.78786	1.2755	4.53772	55.2484	5.69e-06	2.49e-05	166979	protein_coding	HGNC Symbol	5	cell division cycle 20B [Source:HGNC Symbol;Acc:HGNC:24222]	0.0307521	0	0	0.0311655	0	0.1022	0.435101	0.234222	0.25459
ENSG00000112539	C6orf118	2.99135	5.78964	2.00431	2.8886	55.3167	0.00386964	0.0095325	168090	protein_coding	HGNC Symbol	3	chromosome 6 open reading frame 118 [Source:HGNC Symbol;Acc:HGNC:21233]	0	0	0	0	0.0132363	0.0817598	0.0197773	0.117111	0.101836
ENSG00000163395	IGFN1	3.08014	5.82762	2.04274	2.85285	56.7921	0.00433291	0.0105441	91156	protein_coding	HGNC Symbol	6	immunoglobulin-like and fibronectin type III domain containing 1 [Source:HGNC Symbol;Acc:HGNC:24607]	0	0	0	0	0.0132363	0	0.0197773	0.175667	0.0509181
ENSG00000135409	AMHR2	17.0294	5.8317	1.0792	5.40374	56.953	6.53e-08	3.97e-07	269	protein_coding	HGNC Symbol	7	anti-Mullerian hormone receptor type 2 [Source:HGNC Symbol;Acc:HGNC:465]	0.0307521	0.0163698	0	0.140245	0.25149	0.14308	0.276882	0.614834	0.483722
ENSG00000157765	SLC34A2	2.98104	5.83549	1.94904	2.99403	57.1028	0.00275321	0.00700934	10568	protein_coding	HGNC Symbol	7	solute carrier family 34 member 2 [Source:HGNC Symbol;Acc:HGNC:11020]	0	0	0	0.109079	0	0	0.158218	0.0878334	0.025459
ENSG00000181016	LSMEM1	151.33	5.84906	0.512907	11.4037	57.6423	4.01e-30	2.49e-28	286006	protein_coding	HGNC Symbol	5	leucine rich single-pass membrane protein 1 [Source:HGNC Symbol;Acc:HGNC:22036]	0.123008	0.130958	0.142507	0.529814	0.50298	0.429239	2.09639	4.71373	5.32094
ENSG00000079931	MOXD1	3.09469	5.8519	1.94576	3.00752	57.7559	0.0026339	0.00673272	26002	protein_coding	HGNC Symbol	4	monooxygenase DBH like 1 [Source:HGNC Symbol;Acc:HGNC:21063]	0	0	0	0.186993	0	0	0.0395546	0.0585556	0.152754
ENSG00000183423	LRIT3	11.7843	5.854	1.32499	4.41815	57.8403	9.95e-06	4.18e-05	345193	protein_coding	HGNC Symbol	2	leucine rich repeat, Ig-like and transmembrane domains 3 [Source:HGNC Symbol;Acc:HGNC:24783]	0	0.0327396	0	0.155828	0.10589	0	0.197773	0.527	0.229131
ENSG00000182782	HCAR2	3.10446	5.86781	1.86221	3.15099	58.3966	0.00162716	0.00435305	338442	protein_coding	HGNC Symbol	1	hydroxycarboxylic acid receptor 2 [Source:HGNC Symbol;Acc:HGNC:24827]	0	0	0	0	0.0397089	0	0.0988865	0.117111	0.0509181
ENSG00000143195	ILDR2	6.15854	5.87837	1.55377	3.78329	58.8254	0.000154767	0.000511716	387597	protein_coding	HGNC Symbol	9	immunoglobulin like domain containing receptor 2 [Source:HGNC Symbol;Acc:HGNC:18131]	0	0	0.0129552	0.498648	0.211781	0.490559	0.21755	0.234222	0.0763771
ENSG00000163508	EOMES	3.18348	5.88344	1.89722	3.10109	59.0326	0.00192813	0.00507554	8320	protein_coding	HGNC Symbol	3	eomesodermin [Source:HGNC Symbol;Acc:HGNC:3372]	0	0	0	0.0779138	0.0264726	0.1022	0.0395546	0.117111	0.101836
ENSG00000143512	HHIPL2	3.11901	5.89258	2.21134	2.66471	59.4078	0.00770556	0.0175355	79802	protein_coding	HGNC Symbol	4	HHIP like 2 [Source:HGNC Symbol;Acc:HGNC:25842]	0	0	0	0.17141	0.172072	0.02044	0.118664	0	0.152754
ENSG00000165076	PRSS37	3.22787	5.90037	1.90685	3.0943	59.7296	0.0019728	0.00518317	136242	protein_coding	HGNC Symbol	4	serine protease 37 [Source:HGNC Symbol;Acc:HGNC:29211]	0	0	0	0.0311655	0.0397089	0.0408799	0.0395546	0.146389	0.0763771
ENSG00000135925	WNT10A	24.6602	5.9247	1.04789	5.65392	60.7451	1.57e-08	1.05e-07	80326	protein_coding	HGNC Symbol	4	Wnt family member 10A [Source:HGNC Symbol;Acc:HGNC:13829]	0.015376	0.0491093	0	0.264907	0.370617	0.22484	0.21755	0.761223	0.967443
ENSG00000164122	ASB5	3.28682	5.94412	1.87974	3.1622	61.5683	0.00156582	0.00420951	140458	protein_coding	HGNC Symbol	5	ankyrin repeat and SOCS box containing 5 [Source:HGNC Symbol;Acc:HGNC:17180]	0	0	0	0.0155828	0	0	0.0593319	0.0585556	0.152754
ENSG00000089116	LHX5	6.37499	5.95054	1.55056	3.83768	61.8432	0.000124204	0.000420656	64211	protein_coding	HGNC Symbol	2	LIM homeobox 5 [Source:HGNC Symbol;Acc:HGNC:14216]	0	0	0.0129552	0.202576	0.0397089	0.18396	0.316437	0.175667	0.0763771
ENSG00000070190	DAPP1	3.33121	5.95855	1.84211	3.23464	62.1875	0.00121797	0.00335341	27071	protein_coding	HGNC Symbol	4	dual adaptor of phosphotyrosine and 3-phosphoinositides 1 [Source:HGNC Symbol;Acc:HGNC:16500]	0	0	0	0	0.0132363	0	0.0593319	0.0878334	0.127295
ENSG00000168135	KCNJ4	3.33121	5.95855	1.84211	3.23464	62.1875	0.00121797	0.00335341	3761	protein_coding	HGNC Symbol	1	potassium voltage-gated channel subfamily J member 4 [Source:HGNC Symbol;Acc:HGNC:6265]	0	0	0	0.17141	0.0132363	0	0.0593319	0.0878334	0.127295
ENSG00000182601	HS3ST4	11.9698	5.96882	1.25726	4.74747	62.6317	2.06e-06	9.77e-06	9951	protein_coding	HGNC Symbol	2	heparan sulfate-glucosamine 3-sulfotransferase 4 [Source:HGNC Symbol;Acc:HGNC:5200]	0	0	0.0259103	0.249324	0.198545	0.429239	0.316437	0.351334	0.330967
ENSG00000137745	MMP13	3.51118	6.02588	1.86	3.23972	65.1585	0.00119645	0.00329747	4322	protein_coding	HGNC Symbol	3	matrix metallopeptidase 13 [Source:HGNC Symbol;Acc:HGNC:7159]	0	0	0	0	0	0	0.0395546	0.117111	0.127295
ENSG00000183379	SYNDIG1L	25.0678	6.02767	0.91998	6.55196	65.2394	5.68e-11	5.17e-10	646658	protein_coding	HGNC Symbol	3	synapse differentiation inducing 1 like [Source:HGNC Symbol;Acc:HGNC:32388]	0.0307521	0.0163698	0.0129552	0.966131	0.595634	0.24528	1.10753	0.322056	0.763771
ENSG00000180532	ZSCAN4	3.47895	6.03138	1.83203	3.29219	65.4075	0.000994099	0.00279034	201516	protein_coding	HGNC Symbol	2	zinc finger and SCAN domain containing 4 [Source:HGNC Symbol;Acc:HGNC:23709]	0	0	0	0.218159	0.10589	0	0.0791092	0.0585556	0.152754
ENSG00000175985	PLEKHD1	25.5486	6.03495	0.944148	6.39195	65.5692	1.64e-10	1.41e-09	400224	protein_coding	HGNC Symbol	2	pleckstrin homology and coiled-coil domain containing D1 [Source:HGNC Symbol;Acc:HGNC:20148]	0.0461281	0	0.0129552	0.514231	0.304435	0.22484	0.435101	0.849056	0.78923
ENSG00000155897	ADCY8	3.49111	6.052	1.87345	3.2304	66.3488	0.00123617	0.0034001	114	protein_coding	HGNC Symbol	3	adenylate cyclase 8 [Source:HGNC Symbol;Acc:HGNC:239]	0	0	0	0	0.0132363	0.0408799	0.118664	0.0292778	0.152754
ENSG00000181143	MUC16	19.8028	6.08957	1.06725	5.70583	68.0995	1.16e-08	7.86e-08	94025	protein_coding	HGNC Symbol	5	mucin 16, cell surface associated [Source:HGNC Symbol;Acc:HGNC:15582]	0.0307521	0	0.0129552	0.373986	0.25149	0.531439	0.355991	0.439167	0.814689
ENSG00000165168	CYBB	3.61399	6.1186	2.17433	2.81402	69.4835	0.00489268	0.0117119	1536	protein_coding	HGNC Symbol	2	cytochrome b-245 beta chain [Source:HGNC Symbol;Acc:HGNC:2578]	0	0	0	0.062331	0.0529452	0	0.257105	0.0878334	0
ENSG00000277481	PKD1L3	61.5473	6.12997	1.7406	3.52176	70.0334	0.000428697	0.00129635	342372	protein_coding	HGNC Symbol	1	polycystin 1 like 3, transient receptor potential channel interacting [Source:HGNC Symbol;Acc:HGNC:21716]	0	0	0.129552	0.0779138	0.145599	0.12264	0.909756	2.43006	1.62938
ENSG00000142149	HUNK	21.3563	6.13392	1.10157	5.56837	70.2253	2.57e-08	1.66e-07	30811	protein_coding	HGNC Symbol	4	hormonally up-regulated Neu-associated kinase [Source:HGNC Symbol;Acc:HGNC:13326]	0	0.0491093	0	2.57115	1.42952	1.3286	0.29666	0.731945	0.687394
ENSG00000117594	HSD11B1	3.64861	6.13483	1.80065	3.40701	70.2698	0.000656778	0.0019203	3290	protein_coding	HGNC Symbol	4	hydroxysteroid 11-beta dehydrogenase 1 [Source:HGNC Symbol;Acc:HGNC:5208]	0	0	0	0.0934965	0.0529452	0.12264	0.197773	0.0585556	0.0763771
ENSG00000118160	SLC8A2	55.0027	6.15498	0.840944	7.31913	71.2582	2.5e-13	3.07e-12	6543	protein_coding	HGNC Symbol	7	solute carrier family 8 member A2 [Source:HGNC Symbol;Acc:HGNC:11069]	0	0.0491093	0.0647758	0.202576	0.225017	0.0408799	0.474655	2.04945	1.83305
ENSG00000174145	NWD2	7.4945	6.15829	1.48395	4.14993	71.4217	3.33e-05	0.000125467	57495	protein_coding	HGNC Symbol	1	NACHT and WD repeat domain containing 2 [Source:HGNC Symbol;Acc:HGNC:29229]	0	0.0163698	0	0.0934965	0.238254	0.1022	0.197773	0.146389	0.280049
ENSG00000109991	P2RX3	3.77203	6.16117	1.73951	3.5419	71.5645	0.000397258	0.00120885	5024	protein_coding	HGNC Symbol	4	purinergic receptor P2X 3 [Source:HGNC Symbol;Acc:HGNC:8534]	0	0	0	0.109079	0.211781	0.2044	0.138441	0.0878334	0.101836
ENSG00000121075	TBX4	3.78419	6.18052	1.76842	3.49493	72.5309	0.000474183	0.0014255	9496	protein_coding	HGNC Symbol	9	T-box 4 [Source:HGNC Symbol;Acc:HGNC:11603]	0	0	0	0.0311655	0	0.0408799	0.177996	0.0585556	0.101836
ENSG00000122254	HS3ST2	3.91551	6.18428	2.19713	2.81471	72.72	0.00488206	0.0116933	9956	protein_coding	HGNC Symbol	2	heparan sulfate-glucosamine 3-sulfotransferase 2 [Source:HGNC Symbol;Acc:HGNC:5195]	0	0	0	0	0.0264726	0	0	0.204945	0.101836
ENSG00000166405	RIC3	3.82858	6.19395	1.7493	3.54082	73.209	0.000398891	0.00121337	79608	protein_coding	HGNC Symbol	12	RIC3 acetylcholine receptor chaperone [Source:HGNC Symbol;Acc:HGNC:30338]	0	0	0	0.0155828	0.0397089	0.02044	0.177996	0.0878334	0.0763771
ENSG00000060709	RIMBP2	4.1222	6.26328	1.83563	3.41206	76.813	0.000644737	0.00188778	23504	protein_coding	HGNC Symbol	9	RIMS binding protein 2 [Source:HGNC Symbol;Acc:HGNC:30339]	0	0	0	0.747972	0.410326	0.347479	0.0395546	0.0878334	0.203672
ENSG00000177324	BEND2	4.13436	6.27856	1.79088	3.50585	77.6309	0.000455155	0.00137081	139105	protein_coding	HGNC Symbol	2	BEN domain containing 2 [Source:HGNC Symbol;Acc:HGNC:28509]	0	0	0	0	0	0	0.0791092	0.0585556	0.203672
ENSG00000163817	SLC6A20	4.06511	6.27933	1.75401	3.57999	77.6725	0.000343607	0.00106132	54716	protein_coding	HGNC Symbol	7	solute carrier family 6 member 20 [Source:HGNC Symbol;Acc:HGNC:30927]	0	0	0	0.0934965	0.0529452	0.0408799	0.197773	0.117111	0.0509181
ENSG00000154227	CERS3	4.2797	6.33052	1.68576	3.75529	80.4781	0.000173143	0.000565418	204219	protein_coding	HGNC Symbol	8	ceramide synthase 3 [Source:HGNC Symbol;Acc:HGNC:23752]	0	0	0	0.0155828	0.0529452	0.0408799	0.118664	0.117111	0.127295
ENSG00000180828	BHLHE22	4.2797	6.33052	1.68576	3.75529	80.4781	0.000173143	0.000565418	27319	protein_coding	HGNC Symbol	1	basic helix-loop-helix family member e22 [Source:HGNC Symbol;Acc:HGNC:11963]	0	0	0	0.0155828	0.0264726	0	0.118664	0.117111	0.127295
ENSG00000181092	ADIPOQ	4.3241	6.34213	1.68657	3.76037	81.128	0.000169664	0.000555381	9370	protein_coding	HGNC Symbol	2	adiponectin, C1Q and collagen domain containing [Source:HGNC Symbol;Acc:HGNC:13633]	0	0	0	0.062331	0.185308	0.0817598	0.118664	0.146389	0.101836
ENSG00000118432	CNR1	4.3764	6.34529	2.22499	2.85183	81.306	0.00434681	0.0105748	1268	protein_coding	HGNC Symbol	7	cannabinoid receptor 1 [Source:HGNC Symbol;Acc:HGNC:2159]	0	0	0	0.592145	0.436798	0.265719	0	0.292778	0.0509181
ENSG00000164691	TAGAP	65.2073	6.35695	0.718858	8.84313	81.966	9.31e-19	2.14e-17	117289	protein_coding	HGNC Symbol	4	T cell activation RhoGTPase activating protein [Source:HGNC Symbol;Acc:HGNC:15669]	0.0615042	0.0654791	0	0.654476	0.489743	0.367919	1.06797	2.34222	1.88397
ENSG00000176945	MUC20	32.8099	6.39495	0.922671	6.9309	84.1532	4.18e-12	4.4e-11	200958	protein_coding	HGNC Symbol	8	mucin 20, cell surface associated [Source:HGNC Symbol;Acc:HGNC:23282]	0.0615042	0	0	0.264907	0.277962	0.0408799	0.652651	0.995445	1.04382
ENSG00000163623	NKX6-1	4.47183	6.39835	1.66337	3.84663	84.3521	0.000119755	0.000407097	4825	protein_coding	HGNC Symbol	2	NK6 homeobox 1 [Source:HGNC Symbol;Acc:HGNC:7839]	0	0	0	0.0934965	0.0529452	0.0817598	0.138441	0.117111	0.127295
ENSG00000158406	HIST1H4H	723.652	6.40903	0.287709	22.2761	84.9788	6.3e-110	5.18e-107	8365	protein_coding	HGNC Symbol	4	histone cluster 1 H4 family member h [Source:HGNC Symbol;Acc:HGNC:4788]	0.384401	0.474724	0.440476	0.436317	0.635343	0.408799	17.2063	21.285	21.5638
ENSG00000043039	BARX2	4.68404	6.44304	1.70802	3.77222	87.0056	0.000161798	0.000533032	8538	protein_coding	HGNC Symbol	2	BARX homeobox 2 [Source:HGNC Symbol;Acc:HGNC:956]	0	0	0	0	0.0529452	0	0.0791092	0.204945	0.101836
ENSG00000165972	CCDC38	17.0906	6.44575	1.22866	5.24617	87.1693	1.55e-07	8.9e-07	120935	protein_coding	HGNC Symbol	8	coiled-coil domain containing 38 [Source:HGNC Symbol;Acc:HGNC:26843]	0.015376	0.0163698	0	0.062331	0.0397089	0.0613199	0.415323	0.2635	0.738312
ENSG00000175267	VWA3A	33.7549	6.44843	0.873156	7.38519	87.3313	1.52e-13	1.94e-12	146177	protein_coding	HGNC Symbol	8	von Willebrand factor A domain containing 3A [Source:HGNC Symbol;Acc:HGNC:27088]	0.0461281	0	0.0129552	0.109079	0.10589	0.0817598	0.988865	1.20039	0.661935
ENSG00000130226	DPP6	16.5736	6.4681	1.24764	5.18427	88.5302	2.17e-07	1.21e-06	1804	protein_coding	HGNC Symbol	16	dipeptidyl peptidase like 6 [Source:HGNC Symbol;Acc:HGNC:3010]	0	0	0.0259103	0.062331	0.0264726	0.0817598	0.711983	0.204945	0.53464
ENSG00000183454	GRIN2A	4.75275	6.48439	1.66567	3.89297	89.5358	9.9e-05	0.000341427	2903	protein_coding	HGNC Symbol	15	glutamate ionotropic receptor NMDA type subunit 2A [Source:HGNC Symbol;Acc:HGNC:4585]	0	0	0	0.0155828	0.0529452	0.0408799	0.158218	0.175667	0.0763771
ENSG00000164309	CMYA5	125.239	6.51231	0.652191	9.98529	91.2855	1.77e-23	6.33e-22	202333	protein_coding	HGNC Symbol	3	cardiomyopathy associated 5 [Source:HGNC Symbol;Acc:HGNC:14305]	0.123008	0.0654791	0.0259103	0.810303	1.12509	0.633639	1.40419	4.18673	4.42987
ENSG00000015520	NPC1L1	44.8043	6.52926	0.762754	8.56012	92.3643	1.13e-17	2.22e-16	29881	protein_coding	HGNC Symbol	4	NPC1 like intracellular cholesterol transporter 1 [Source:HGNC Symbol;Acc:HGNC:7898]	0.0615042	0.0163698	0	0.202576	0.158836	0.12264	1.42397	1.08328	1.29841
ENSG00000117407	ARTN	4.93511	6.53375	1.64495	3.97202	92.6523	7.13e-05	0.000251855	9048	protein_coding	HGNC Symbol	11	artemin [Source:HGNC Symbol;Acc:HGNC:727]	0	0	0	0.311655	0.145599	0.14308	0.118664	0.117111	0.178213
ENSG00000162992	NEUROD1	4.93511	6.53375	1.64495	3.97202	92.6523	7.13e-05	0.000251855	4760	protein_coding	HGNC Symbol	2	neuronal differentiation 1 [Source:HGNC Symbol;Acc:HGNC:7762]	0	0	0	0	0.0132363	0.0408799	0.118664	0.117111	0.178213
ENSG00000168243	GNG4	55.1016	6.57465	0.705297	9.32182	95.3164	1.14e-20	3.22e-19	2786	protein_coding	HGNC Symbol	5	G protein subunit gamma 4 [Source:HGNC Symbol;Acc:HGNC:4407]	0	0.0327396	0.0518206	0.342821	0.238254	0.24528	1.56241	1.75667	1.32387
ENSG00000100156	SLC16A8	301.91	6.60584	0.499677	13.2202	97.3996	6.71e-40	8.22e-38	23539	protein_coding	HGNC Symbol	3	solute carrier family 16 member 8 [Source:HGNC Symbol;Acc:HGNC:16270]	0.169136	0.163698	0.142507	1.48036	1.28392	2.02356	3.8368	8.90045	11.5329
ENSG00000009709	PAX7	48.5216	6.63831	0.821283	8.08285	99.6164	6.33e-16	1.06e-14	5081	protein_coding	HGNC Symbol	3	paired box 7 [Source:HGNC Symbol;Acc:HGNC:8621]	0.015376	0.0327396	0.0259103	0.498648	0.582397	0.531439	0.751538	1.581	1.60392
ENSG00000050030	NEXMIF	53.1182	6.65481	1.5193	4.38019	100.762	1.19e-05	4.91e-05	340533	protein_coding	HGNC Symbol	4	neurite extension and migration factor [Source:HGNC Symbol;Acc:HGNC:29433]	0	0.0818489	0	0.545396	0.516216	0.429239	0.791092	1.72739	1.78213
ENSG00000070985	TRPM5	10.5987	6.65726	1.4307	4.65314	100.933	3.27e-06	1.49e-05	29850	protein_coding	HGNC Symbol	4	transient receptor potential cation channel subfamily M member 5 [Source:HGNC Symbol;Acc:HGNC:14323]	0	0	0.0129552	0.062331	0.0529452	0.0817598	0.197773	0.2635	0.407345
ENSG00000158014	SLC30A2	5.40816	6.66767	1.5952	4.17983	101.664	2.92e-05	0.000111596	7780	protein_coding	HGNC Symbol	3	solute carrier family 30 member 2 [Source:HGNC Symbol;Acc:HGNC:11013]	0	0	0	0.28049	0.0926541	0.0613199	0.158218	0.175667	0.127295
ENSG00000087589	CASS4	29.0089	6.67168	1.02266	6.52382	101.947	6.85e-11	6.18e-10	57091	protein_coding	HGNC Symbol	3	Cas scaffold protein family member 4 [Source:HGNC Symbol;Acc:HGNC:15878]	0	0	0.0388655	0.483065	0.582397	0.449679	0.632874	0.644112	1.1202
ENSG00000061337	LZTS1	5.78504	6.76984	1.77249	3.81939	109.125	0.000133783	0.000449208	11178	protein_coding	HGNC Symbol	4	leucine zipper tumor suppressor 1 [Source:HGNC Symbol;Acc:HGNC:13861]	0	0	0	0.311655	0.264726	0.306599	0.118664	0.0292778	0.330967
ENSG00000137558	PI15	5.88912	6.77254	1.75416	3.86084	109.33	0.000113	0.00038573	51050	protein_coding	HGNC Symbol	3	peptidase inhibitor 15 [Source:HGNC Symbol;Acc:HGNC:8946]	0	0	0	0	0.0264726	0	0.0791092	0.351334	0.0509181
ENSG00000050628	PTGER3	21.5373	6.78958	1.15245	5.89144	110.629	3.83e-09	2.75e-08	5733	protein_coding	HGNC Symbol	12	prostaglandin E receptor 3 [Source:HGNC Symbol;Acc:HGNC:9595]	0	0.0327396	0	0.062331	0.0264726	0	0.830647	0.527	0.509181
ENSG00000167851	CD300A	6.16027	6.83424	1.75844	3.88653	114.107	0.000101687	0.000349878	11314	protein_coding	HGNC Symbol	7	CD300a molecule [Source:HGNC Symbol;Acc:HGNC:19319]	0	0	0	0	0.0132363	0	0.0395546	0.351334	0.101836
ENSG00000137462	TLR2	5.89762	6.83552	1.68398	4.05914	114.208	4.93e-05	0.000179864	7097	protein_coding	HGNC Symbol	9	toll like receptor 2 [Source:HGNC Symbol;Acc:HGNC:11848]	0	0	0	1.19987	0.0264726	0.0408799	0.395546	0.0585556	0.101836
ENSG00000130675	MNX1	6.10796	6.83882	1.55897	4.38675	114.469	1.15e-05	4.78e-05	3110	protein_coding	HGNC Symbol	8	motor neuron and pancreas homeobox 1 [Source:HGNC Symbol;Acc:HGNC:4979]	0	0	0	0.0311655	0.0661815	0.0817598	0.158218	0.204945	0.152754
ENSG00000109158	GABRA4	6.13229	6.86439	1.54806	4.43419	116.516	9.24e-06	3.92e-05	2557	protein_coding	HGNC Symbol	5	gamma-aminobutyric acid type A receptor alpha4 subunit [Source:HGNC Symbol;Acc:HGNC:4078]	0	0	0	0	0	0	0.237328	0.146389	0.152754
ENSG00000074047	GLI2	50.7607	6.98988	0.916092	7.6301	127.105	2.35e-14	3.32e-13	2736	protein_coding	HGNC Symbol	13	GLI family zinc finger 2 [Source:HGNC Symbol;Acc:HGNC:4318]	0	0.0654791	0	2.85164	1.7869	1.49212	0.791092	1.75667	1.57846
ENSG00000119715	ESRRB	51.7757	7.056	0.812535	8.68394	133.066	3.82e-18	7.99e-17	2103	protein_coding	HGNC Symbol	8	estrogen related receptor beta [Source:HGNC Symbol;Acc:HGNC:3473]	0.0307521	0.0327396	0	0.296072	0.304435	0.22484	1.46352	1.37606	1.52754
ENSG00000166592	RRAD	594.729	7.09454	0.3255	21.7958	136.669	2.54e-105	1.74e-102	6236	protein_coding	HGNC Symbol	5	RRAD, Ras related glycolysis inhibitor and calcium channel regulator [Source:HGNC Symbol;Acc:HGNC:10446]	0.107632	0.327396	0.233193	1.96343	0.450034	0.674519	16.7514	15.5465	17.8722
ENSG00000176988	FMR1NB	7.35193	7.12159	1.49127	4.77553	139.256	1.79e-06	8.63e-06	158521	protein_coding	HGNC Symbol	2	FMR1 neighbor [Source:HGNC Symbol;Acc:HGNC:26372]	0	0	0	0.0155828	0	0	0.257105	0.175667	0.203672
ENSG00000137699	TRIM29	7.56652	7.15031	1.50973	4.73616	142.056	2.18e-06	1.03e-05	23650	protein_coding	HGNC Symbol	21	tripartite motif containing 29 [Source:HGNC Symbol;Acc:HGNC:17274]	0	0	0	0.109079	0.185308	0.22484	0.177996	0.175667	0.280049
ENSG00000012504	NR1H4	7.4225	7.16624	1.62012	4.42328	143.632	9.72e-06	4.1e-05	9971	protein_coding	HGNC Symbol	11	nuclear receptor subfamily 1 group H member 4 [Source:HGNC Symbol;Acc:HGNC:7967]	0	0	0	0.0155828	0.0132363	0	0.51421	0.0878334	0.101836
ENSG00000110436	SLC1A2	7.84558	7.19112	1.73872	4.13588	146.131	3.54e-05	0.000132852	6506	protein_coding	HGNC Symbol	50	solute carrier family 1 member 2 [Source:HGNC Symbol;Acc:HGNC:10940]	0	0	0	0.17141	0.132363	0.16352	0.0197773	0.292778	0.305508
ENSG00000110203	FOLR3	7.94414	7.20361	1.61698	4.45498	147.402	8.39e-06	3.59e-05	2352	protein_coding	HGNC Symbol	6	folate receptor 3 [Source:HGNC Symbol;Acc:HGNC:3795]	0	0	0	0.0934965	0	0.2044	0.0791092	0.409889	0.152754
ENSG00000179674	ARL14	7.89183	7.20772	1.48514	4.85321	147.822	1.21e-06	6.03e-06	80117	protein_coding	HGNC Symbol	1	ADP ribosylation factor like GTPase 14 [Source:HGNC Symbol;Acc:HGNC:22974]	0	0	0	0.062331	0.0529452	0.0408799	0.197773	0.2635	0.203672
ENSG00000043355	ZIC2	8.57156	7.33977	1.45237	5.05364	161.991	4.33e-07	2.31e-06	7546	protein_coding	HGNC Symbol	5	Zic family member 2 [Source:HGNC Symbol;Acc:HGNC:12873]	0	0	0	0.202576	0.158836	0.12264	0.276882	0.204945	0.25459
ENSG00000166148	AVPR1A	9.07738	7.40118	1.56642	4.72491	169.035	2.3e-06	1.08e-05	552	protein_coding	HGNC Symbol	2	arginine vasopressin receptor 1A [Source:HGNC Symbol;Acc:HGNC:895]	0	0	0	0	0	0	0.0791092	0.292778	0.356426
ENSG00000158525	CPA5	9.13155	7.40803	1.50666	4.91685	169.84	8.79e-07	4.46e-06	93979	protein_coding	HGNC Symbol	11	carboxypeptidase A5 [Source:HGNC Symbol;Acc:HGNC:15722]	0	0	0	0.747972	0.542689	0.470119	0.138441	0.380611	0.229131
ENSG00000143921	ABCG8	9.01424	7.44046	1.5086	4.93202	173.701	8.14e-07	4.15e-06	64241	protein_coding	HGNC Symbol	4	ATP binding cassette subfamily G member 8 [Source:HGNC Symbol;Acc:HGNC:13887]	0	0	0	0.0934965	0.0529452	0	0.533987	0.146389	0.152754
ENSG00000265190	ANXA8	9.44709	7.45569	1.54174	4.83589	175.544	1.33e-06	6.53e-06	653145	protein_coding	HGNC Symbol	8	annexin A8 [Source:HGNC Symbol;Acc:HGNC:546]	0	0	0	0.0934965	0.10589	0.0817598	0.0988865	0.409889	0.25459
ENSG00000165186	PTCHD1	9.76635	7.5351	1.46386	5.14743	185.477	2.64e-07	1.46e-06	139411	protein_coding	HGNC Symbol	2	patched domain containing 1 [Source:HGNC Symbol;Acc:HGNC:26392]	0	0	0	0.28049	0.0529452	0.12264	0.415323	0.322056	0.127295
ENSG00000162897	FCAMR	9.78515	7.55705	1.56385	4.83233	188.321	1.35e-06	6.63e-06	83953	protein_coding	HGNC Symbol	7	Fc fragment of IgA and IgM receptor [Source:HGNC Symbol;Acc:HGNC:24692]	0	0	0	0	0	0	0.593319	0.0585556	0.25459
ENSG00000047662	FAM184B	220.619	7.58272	0.539502	14.055	191.702	7.17e-45	1.18e-42	27146	protein_coding	HGNC Symbol	1	family with sequence similarity 184 member B [Source:HGNC Symbol;Acc:HGNC:29235]	0.0307521	0.0654791	0.077731	0.17141	0.198545	0.2044	4.46967	6.324	7.43404
ENSG00000090402	SI	10.3657	7.59724	1.45843	5.20918	193.64	1.9e-07	1.07e-06	6476	protein_coding	HGNC Symbol	3	sucrase-isomaltase [Source:HGNC Symbol;Acc:HGNC:10856]	0	0	0	0.155828	0.211781	0.327039	0.177996	0.292778	0.381885
ENSG00000269502	DMRTC1	10.5798	7.63529	1.40794	5.42301	198.816	5.86e-08	3.59e-07	63947	protein_coding	HGNC Symbol	4	DMRT like family C1 [Source:HGNC Symbol;Acc:HGNC:13910]	0	0	0	0.296072	0.0926541	0.1022	0.29666	0.322056	0.280049
ENSG00000158486	DNAH3	212.47	7.66609	0.581226	13.1895	203.106	1.01e-39	1.22e-37	55567	protein_coding	HGNC Symbol	6	dynein axonemal heavy chain 3 [Source:HGNC Symbol;Acc:HGNC:2949]	0.0768802	0.0327396	0.0518206	0.514231	0.529452	0.470119	11.6686	3.9525	3.71702
ENSG00000163046	ANKRD30BL	11.3811	7.72957	1.47894	5.22642	212.243	1.73e-07	9.84e-07	554226	protein_coding	HGNC Symbol	6	ankyrin repeat domain 30B like [Source:HGNC Symbol;Acc:HGNC:35167]	0	0	0	0.373986	0.463271	0.347479	0.138441	0.351334	0.432804
ENSG00000180316	PNPLA1	21.8421	7.74061	1.33105	5.81541	213.872	6.05e-09	4.25e-08	285848	protein_coding	HGNC Symbol	5	patatin like phospholipase domain containing 1 [Source:HGNC Symbol;Acc:HGNC:21246]	0	0.0163698	0	0.062331	0.0794178	0.0408799	1.10753	0.322056	0.53464
ENSG00000176887	SOX11	11.4273	7.74712	1.39278	5.56235	214.841	2.66e-08	1.71e-07	6664	protein_coding	HGNC Symbol	1	SRY-box 11 [Source:HGNC Symbol;Acc:HGNC:11191]	0	0	0	0.576562	0.661815	0.388359	0.316437	0.322056	0.330967
ENSG00000072657	TRHDE	11.6054	7.75614	1.49384	5.19207	216.187	2.08e-07	1.17e-06	29953	protein_coding	HGNC Symbol	7	thyrotropin releasing hormone degrading enzyme [Source:HGNC Symbol;Acc:HGNC:30748]	0	0	0	0.0311655	0	0.02044	0.118664	0.409889	0.407345
ENSG00000177103	DSCAML1	25.4813	7.93252	1.32634	5.98077	244.303	2.22e-09	1.65e-08	57453	protein_coding	HGNC Symbol	5	DS cell adhesion molecule like 1 [Source:HGNC Symbol;Acc:HGNC:14656]	0.015376	0	0	0.311655	0.198545	0.367919	0.454878	0.644112	0.992902
ENSG00000164270	HTR4	13.5516	7.98636	1.44086	5.54276	253.59	2.98e-08	1.89e-07	3360	protein_coding	HGNC Symbol	13	5-hydroxytryptamine receptor 4 [Source:HGNC Symbol;Acc:HGNC:5299]	0	0	0	0.0779138	0.158836	0.0613199	0.197773	0.322056	0.585558
ENSG00000184302	SIX6	13.3	8.00034	1.57487	5.07999	256.06	3.77e-07	2.03e-06	4990	protein_coding	HGNC Symbol	1	SIX homeobox 6 [Source:HGNC Symbol;Acc:HGNC:10892]	0	0	0	0.389569	0.370617	0.449679	0.988865	0.0585556	0.229131
ENSG00000177551	NHLH2	26.6969	8.01583	1.29214	6.20354	258.824	5.52e-10	4.44e-09	4808	protein_coding	HGNC Symbol	3	nescient helix-loop-helix 2 [Source:HGNC Symbol;Acc:HGNC:7818]	0	0.0163698	0	0.420734	0.158836	0.14308	0.909756	0.468445	0.916525
ENSG00000118307	CASC1	13.8867	8.0192	1.38628	5.7847	259.43	7.26e-09	5.06e-08	55259	protein_coding	HGNC Symbol	13	cancer susceptibility 1 [Source:HGNC Symbol;Acc:HGNC:29599]	0	0	0	0.0934965	0.0661815	0	0.276882	0.468445	0.407345
ENSG00000130035	GALNT8	13.7498	8.03307	1.44734	5.55022	261.935	2.85e-08	1.82e-07	3742	protein_coding	HGNC Symbol	6	polypeptide N-acetylgalactosaminyltransferase 8 [Source:HGNC Symbol;Acc:HGNC:4130]	0	0	0	0.124662	0.10589	0.0408799	0.553765	0.117111	0.53464
ENSG00000130035.1	GALNT8	13.7498	8.03307	1.44734	5.55022	261.935	2.85e-08	1.82e-07	26290	protein_coding	HGNC Symbol	6	polypeptide N-acetylgalactosaminyltransferase 8 [Source:HGNC Symbol;Acc:HGNC:4130]	0	0	0	0.124662	0.10589	0.0408799	0.553765	0.117111	0.53464
ENSG00000158055	GRHL3	53.091	8.12336	1.15541	7.03074	278.852	2.05e-12	2.26e-11	57822	protein_coding	HGNC Symbol	9	grainyhead like transcription factor 3 [Source:HGNC Symbol;Acc:HGNC:25839]	0	0	0.0259103	0.607727	0.754469	0.735839	0.810869	1.61028	1.90943
ENSG00000070193	FGF10	15.4462	8.17562	1.3611	6.00661	289.14	1.89e-09	1.42e-08	2255	protein_coding	HGNC Symbol	2	fibroblast growth factor 10 [Source:HGNC Symbol;Acc:HGNC:3666]	0	0	0	0.0779138	0.132363	0.408799	0.336214	0.468445	0.483722
ENSG00000163606	CD200R1	15.7197	8.20194	1.39341	5.88623	294.463	3.95e-09	2.83e-08	131450	protein_coding	HGNC Symbol	5	CD200 receptor 1 [Source:HGNC Symbol;Acc:HGNC:24235]	0	0	0	0.218159	0.185308	0.18396	0.276882	0.380611	0.636476
ENSG00000092607	TBX15	15.7144	8.20958	1.36513	6.01379	296.026	1.81e-09	1.36e-08	6913	protein_coding	HGNC Symbol	3	T-box 15 [Source:HGNC Symbol;Acc:HGNC:11594]	0	0	0	0.872634	0.35738	0.24528	0.51421	0.585556	0.25459
ENSG00000130695	CEP85	65456.4	8.24526	0.312704	26.3676	303.439	3.22e-153	8.82e-150	64793	protein_coding	HGNC Symbol	8	centrosomal protein 85 [Source:HGNC Symbol;Acc:HGNC:25309]	12.0856	10.0838	11.1544	934.342	737.54	645.31	1116.61	2174.46	2078.81
ENSG00000089101	CFAP61	60.249	8.27339	1.10355	7.49703	309.412	6.53e-14	8.8e-13	26074	protein_coding	HGNC Symbol	21	cilia and flagella associated protein 61 [Source:HGNC Symbol;Acc:HGNC:15872]	0	0.0327396	0	0.202576	0.0926541	0.18396	1.26575	1.87378	1.85851
ENSG00000142583	SLC2A5	125.629	8.36117	0.816837	10.236	328.823	1.37e-24	5.51e-23	6518	protein_coding	HGNC Symbol	10	solute carrier family 2 member 5 [Source:HGNC Symbol;Acc:HGNC:11010]	0	0.0163698	0.0388655	0.436317	0.701524	0.633639	2.53149	3.71828	4.14982
ENSG00000084093	REST	325626	8.36791	0.342008	24.467	330.363	3.32e-132	4.54e-129	5978	protein_coding	HGNC Symbol	12	RE1 silencing transcription factor [Source:HGNC Symbol;Acc:HGNC:9966]	54.9386	48.5037	48.8539	4582.79	3929.86	5106.92	4872.48	10859.3	10821.7
ENSG00000277893	SRD5A2	17.9999	8.391	1.44243	5.81727	335.692	5.98e-09	4.21e-08	6716	protein_coding	HGNC Symbol	1	steroid 5 alpha-reductase 2 [Source:HGNC Symbol;Acc:HGNC:11285]	0	0	0	0.0311655	0.0264726	0	0.197773	0.878334	0.381885
ENSG00000137766	UNC13C	18.955	8.46917	1.34145	6.31345	354.383	2.73e-10	2.28e-09	440279	protein_coding	HGNC Symbol	6	unc-13 homolog C [Source:HGNC Symbol;Acc:HGNC:23149]	0	0	0	0.0467483	0.0397089	0.0817598	0.395546	0.673389	0.509181
ENSG00000183421	RIPK4	18.9762	8.48628	1.34601	6.30478	358.611	2.89e-10	2.4e-09	54101	protein_coding	HGNC Symbol	2	receptor interacting serine/threonine kinase 4 [Source:HGNC Symbol;Acc:HGNC:496]	0	0	0	0.825886	0.304435	0.22484	0.553765	0.322056	0.738312
ENSG00000143107	FNDC7	71.1172	8.53364	1.10568	7.71802	370.579	1.18e-14	1.72e-13	163479	protein_coding	HGNC Symbol	2	fibronectin type III domain containing 7 [Source:HGNC Symbol;Acc:HGNC:26668]	0.015376	0	0.0129552	0	0	0	1.40419	2.34222	2.13856
ENSG00000179915	NRXN1	23.1478	8.76787	1.29038	6.79479	435.906	1.08e-11	1.08e-10	9378	protein_coding	HGNC Symbol	67	neurexin 1 [Source:HGNC Symbol;Acc:HGNC:8008]	0	0	0	0.327238	0.264726	0.347479	0.692206	0.673389	0.611017
ENSG00000277586	NEFL	24.6964	8.877	1.30252	6.81527	470.157	9.41e-12	9.48e-11	4747	protein_coding	HGNC Symbol	4	neurofilament light [Source:HGNC Symbol;Acc:HGNC:7739]	0	0	0	0.436317	0.317671	0.408799	1.08775	0.673389	0.432804
ENSG00000156194	PPEF2	53.0828	9.0017	1.23864	7.26742	512.604	3.66e-13	4.37e-12	5470	protein_coding	HGNC Symbol	8	protein phosphatase with EF-hand domain 2 [Source:HGNC Symbol;Acc:HGNC:9244]	0	0.0163698	0	0.062331	0	0	1.50308	1.3175	1.6803
ENSG00000135638	EMX1	274.885	9.17251	0.689674	13.2998	577.031	2.32e-40	2.93e-38	2016	protein_coding	HGNC Symbol	6	empty spiracles homeobox 1 [Source:HGNC Symbol;Acc:HGNC:3340]	0	0.0327396	0.0388655	0.810303	0.569161	0.408799	10.8182	7.49512	5.75374
ENSG00000086570	FAT2	7419.42	9.19131	0.35679	25.7611	584.6	2.42e-146	4.97e-143	2196	protein_coding	HGNC Symbol	2	FAT atypical cadherin 2 [Source:HGNC Symbol;Acc:HGNC:3596]	0.461281	0.818489	0.673668	216.678	211.159	401.339	130.688	234.837	244.916
ENSG00000118514	ALDH8A1	31.324	9.19811	1.32626	6.93538	587.363	4.05e-12	4.27e-11	64577	protein_coding	HGNC Symbol	6	aldehyde dehydrogenase 8 family member A1 [Source:HGNC Symbol;Acc:HGNC:15471]	0	0	0	0.17141	0.132363	0.12264	0.494433	0.849056	1.22203
ENSG00000176769	TCERG1L	32.9366	9.27727	1.26144	7.35452	620.493	1.92e-13	2.41e-12	256536	protein_coding	HGNC Symbol	2	transcription elongation regulator 1 like [Source:HGNC Symbol;Acc:HGNC:23533]	0	0	0	0.311655	0.264726	0.408799	1.00864	0.995445	0.814689
ENSG00000111181	SLC6A12	34.6602	9.34236	1.29437	7.21769	649.127	5.29e-13	6.2e-12	6539	protein_coding	HGNC Symbol	16	solute carrier family 6 member 12 [Source:HGNC Symbol;Acc:HGNC:11045]	0	0	0	0.233741	0.0661815	0.0613199	0.652651	1.17111	1.04382
ENSG00000137270	GCM1	34.9805	9.37312	1.27185	7.36964	663.115	1.71e-13	2.17e-12	8521	protein_coding	HGNC Symbol	1	glial cells missing transcription factor 1 [Source:HGNC Symbol;Acc:HGNC:4197]	0	0	0	0.514231	0.185308	0.24528	1.20642	0.644112	1.17112
ENSG00000165325	DEUP1	37.9816	9.47545	1.29776	7.30139	711.86	2.85e-13	3.46e-12	159989	protein_coding	HGNC Symbol	12	deuterosome assembly protein 1 [Source:HGNC Symbol;Acc:HGNC:26344]	0	0	0	0.0311655	0.0264726	0.0408799	0.652651	1.20039	1.27295
ENSG00000137648	TMPRSS4	140.394	9.5019	1.09787	8.65485	725.029	4.94e-18	1.02e-16	56649	protein_coding	HGNC Symbol	20	transmembrane serine protease 4 [Source:HGNC Symbol;Acc:HGNC:11878]	0	0.0327396	0	0.79472	1.15156	1.3286	2.43261	4.24528	4.86268
ENSG00000179520	SLC17A8	39.2697	9.54183	1.29289	7.38026	745.38	1.58e-13	2.01e-12	246213	protein_coding	HGNC Symbol	4	solute carrier family 17 member 8 [Source:HGNC Symbol;Acc:HGNC:20151]	0	0	0	0.124662	0	0.0408799	1.72063	1.25895	0.509181
ENSG00000142611	PRDM16	874.82	9.85593	0.98553	10.0006	926.684	1.51e-23	5.55e-22	63976	protein_coding	HGNC Symbol	10	PR/SET domain 16 [Source:HGNC Symbol;Acc:HGNC:14000]	0.123008	0	0.0259103	2.41533	2.3693	2.3506	46.6349	18.4157	14.5116
ENSG00000182795	C1orf116	246.621	10.3266	1.06315	9.71321	1284.14	2.65e-22	8.37e-21	79098	protein_coding	HGNC Symbol	2	chromosome 1 open reading frame 116 [Source:HGNC Symbol;Acc:HGNC:28667]	0.015376	0.0163698	0	0.4519	0.0397089	0.0408799	5.7552	8.28562	6.61935
ENSG00000087116	ADAMTS2	405.746	10.4694	0.900475	11.6265	1417.75	3.02e-31	2.05e-29	9509	protein_coding	HGNC Symbol	5	ADAM metallopeptidase with thrombospondin type 1 motif 2 [Source:HGNC Symbol;Acc:HGNC:218]	0.0307521	0	0.0129552	5.50071	5.44012	3.65875	7.79226	12.3845	13.3915
ENSG00000163618	CADPS	287.684	11.4447	1.27616	8.9681	2787.48	3.02e-19	7.33e-18	8618	protein_coding	HGNC Symbol	20	calcium dependent secretion activator [Source:HGNC Symbol;Acc:HGNC:1426]	0	0	0.0129552	0.155828	0.25149	0.22484	3.16437	9.25178	10.8201
ENSG00000143373	ZNF687	2.64522e+06	11.8609	0.336876	35.2085	3719.5	1.48e-271	6.09e-268	57592	protein_coding	HGNC Symbol	7	zinc finger protein 687 [Source:HGNC Symbol;Acc:HGNC:29277]	37.9019	33.5417	38.6452	38322	32088.9	44791.3	40816	86783.9	88956.7
ENSG00000010379	SLC6A13	210.217	11.9532	1.25606	9.51643	3965.17	1.79e-21	5.22e-20	6540	protein_coding	HGNC Symbol	12	solute carrier family 6 member 13 [Source:HGNC Symbol;Acc:HGNC:11046]	0	0	0	0.358403	0.225017	0.22484	3.14459	6.324	7.71409
ENSG00000177556	ATOX1	1.13386e+07	12.3935	0.280288	44.217	5380.38	0	0	475	protein_coding	HGNC Symbol	7	antioxidant 1 copper chaperone [Source:HGNC Symbol;Acc:HGNC:798]	102.497	97.9568	125.263	312643	307125	445780	225069	361019	354397
ENSG00000165300	SLITRK5	5957.03	12.868	1.05153	12.2374	7475.51	1.96e-34	1.58e-32	26050	protein_coding	HGNC Symbol	1	SLIT and NTRK like family member 5 [Source:HGNC Symbol;Acc:HGNC:20295]	0	0.0982187	0.0259103	30.7292	29.1596	47.0324	89.2154	191.652	206.167
ENSG00000109819	PPARGC1A	2126.8	15.2954	1.22455	12.4907	40214.6	8.39e-36	7.49e-34	10891	protein_coding	HGNC Symbol	18	PPARG coactivator 1 alpha [Source:HGNC Symbol;Acc:HGNC:9237]	0	0	0	17.515	16.9954	28.7181	38.6449	66.4313	70.4706
