# Supplementary material for: Whole-Transcriptome Sequencing Analyses of Nuclear Antixoxidant-1 in Endothelial Cells: Role in Inflammation and Atherosclerosis
Source: Cells. 2022 Sep 18;11(18):2919. doi: 10.3390/cells11182919 (PMC9496719; doi:10.3390/cells11182919)
Supplement: Supplementary file 1 [file cells-11-02919-s001.zip › Supplementary Table S3 - Atox1_GO_BP pathway.xlsx]

## Sheet: Atox1_GO_BP
Supplementary Table S3. Related to Supp. Fig. S1A. Gene Oncology (Biological Pathway) analysis of genes listed in Supplementary Tables S1 and S2
ID	Description	GeneRatio	BgRatio	pvalue	p.adjust	qvalue	geneID	Count
GO:0000280	nuclear division	61/1235	407/18670	1.52139e-09	5.2851e-06	4.48147e-06	150280/64793/83990/23397/991/1063/701/5347/23126/10274/24137/4438/9928/4926/9665/10615/9918/8877/81929/151246/9232/4361/332/26993/11200/245711/11065/54456/995/54820/29893/6683/79866/5888/7153/286151/64151/7290/685/11004/83540/10403/54443/9700/8086/51203/9493/7039/84861/9319/4488/4751/6790/126731/284071/10460/79075/1618/9212/29947/26271	61
GO:0048285	organelle fission	65/1235	449/18670	1.86687e-09	5.2851e-06	4.48147e-06	150280/64793/83990/23397/991/1063/701/5347/23126/10274/89866/23259/24137/4438/9928/4926/9665/10615/9918/8877/81929/151246/9232/4361/332/26993/11200/245711/11065/54456/10891/995/54820/29893/6683/79866/5888/7153/286151/64151/7290/685/11004/83540/10403/54443/9700/8086/51203/9493/8800/7039/84861/9319/4488/4751/6790/126731/284071/10460/79075/1618/9212/29947/26271	65
GO:0140014	mitotic nuclear division	45/1235	264/18670	4.09774e-09	7.7338e-06	6.55782e-06	64793/23397/991/1063/701/5347/23126/10274/24137/9928/4926/10615/9918/8877/81929/9232/332/26993/11200/11065/995/54820/6683/79866/64151/7290/685/11004/83540/10403/54443/9700/8086/51203/9493/7039/84861/9319/4751/6790/126731/10460/79075/9212/26271	45
GO:0000819	sister chromatid segregation	36/1235	189/18670	7.42278e-09	1.05069e-05	8.90929e-06	150280/23397/991/1063/701/5347/23126/10274/24137/9928/4926/10615/9918/81929/151246/9232/4361/26993/55294/7153/64151/7290/11004/83540/116028/10403/9700/51203/9493/84861/9319/4751/10460/79075/9212/26271	36
GO:0000070	mitotic sister chromatid segregation	29/1235	151/18670	1.74516e-07	0.000197622	0.000167572	23397/991/1063/701/5347/23126/24137/9928/4926/10615/9918/81929/9232/26993/64151/7290/11004/83540/10403/9700/51203/9493/84861/9319/4751/10460/79075/9212/26271	29
GO:0007059	chromosome segregation	47/1235	321/18670	2.33934e-07	0.000220756	0.000187188	150280/64793/83990/23397/991/1063/701/5347/23126/10274/24137/4438/9928/4926/57082/7156/10615/9918/81929/220134/151246/9232/157313/4361/332/26993/55294/54820/7153/64151/7290/11004/83540/221150/116028/10403/9700/51203/9493/84861/9319/4751/284071/10460/79075/9212/26271	47
GO:0098813	nuclear chromosome segregation	40/1235	262/18670	6.142e-07	0.0004968	0.000421258	150280/83990/23397/991/1063/701/5347/23126/10274/24137/4438/9928/4926/57082/10615/9918/81929/151246/9232/4361/26993/55294/7153/64151/7290/11004/83540/116028/10403/9700/51203/9493/84861/9319/4751/284071/10460/79075/9212/26271	40
GO:1902850	microtubule cytoskeleton organization involved in mitosis	25/1235	131/18670	1.36914e-06	0.000969006	0.000821662	3925/991/5347/10274/24137/4926/25886/29899/332/11200/54820/6683/79866/2255/83540/10403/9700/8086/51203/9493/4751/6790/126731/10460/9212	25
GO:0048568	embryonic organ development	55/1235	428/18670	1.68341e-06	0.00105905	0.000898014	123872/57822/4254/8521/1301/7042/7054/4647/2535/10194/6664/55764/5311/9750/22846/2736/9423/639/57453/2735/7043/6692/5930/2487/7855/7020/28996/25861/144455/6913/2255/8320/9132/161882/9394/23493/157506/3142/5076/8013/220/2702/60529/1045/10653/8463/3549/6899/3815/4188/129880/4760/55897/2020/5459	55
GO:0045787	positive regulation of cell cycle	51/1235	389/18670	2.22261e-06	0.00122122	0.00103552	64094/8444/9928/7042/8061/4926/7023/10615/84440/8877/4193/8318/25886/5311/29899/2735/6532/8851/11200/245711/993/11065/995/144455/6683/79915/23476/7161/685/2255/51514/10403/8013/51512/85459/894/9700/51203/9493/7039/905/4488/7051/6790/284071/2852/1618/9212/1490/26271/4303	51
GO:0048863	stem cell differentiation	38/1235	257/18670	2.57704e-06	0.00122122	0.00103552	4254/10500/3911/5708/9221/7042/8829/2/6664/56920/57556/10371/10512/5979/55553/4005/2487/84541/8626/5978/2099/5308/4602/7161/80326/8320/2103/3720/157506/5076/57715/8463/4072/6899/3815/4488/29947/4303	38
GO:0048732	gland development	55/1235	434/18670	2.58824e-06	0.00122122	0.00103552	123872/9914/9480/90780/9095/462/3911/7049/1435/7042/8829/7421/634/5311/1436/10371/5423/445/10512/2736/128239/9423/55679/2735/59277/4939/7043/9133/5021/2487/8626/55294/2099/5308/7038/2516/144455/3664/38/80326/2255/3720/3142/374/220/9076/570/3549/6899/8600/4488/6790/8543/7128/55897	55
GO:0022612	gland morphogenesis	23/1235	120/18670	3.31495e-06	0.00144379	0.00122425	3911/1435/7042/8829/7421/634/1436/10371/5423/10512/2736/9423/55679/2735/59277/7043/8626/55294/2099/2255/374/4488/7128	23
GO:0048871	multicellular organismal homeostasis	59/1235	486/18670	4.48221e-06	0.00181273	0.00153709	4982/9696/57822/3925/353500/1258/57482/1435/134/4588/1240/11096/32/9370/166379/84059/1436/29887/2055/114/5733/64127/387597/84283/7275/56890/7226/376497/5021/23228/25937/8626/10891/8842/112609/25861/55765/5608/63976/50507/1268/5027/2103/53833/8013/216/9076/947/51320/3549/8600/5166/59344/7128/4069/4760/1490/338773/153	59
GO:0007052	mitotic spindle organization	21/1235	106/18670	5.08043e-06	0.00189364	0.0016057	3925/991/5347/10274/24137/4926/25886/29899/332/11200/6683/79866/83540/10403/8086/9493/4751/6790/126731/10460/9212	21
GO:0042476	odontogenesis	24/1235	132/18670	5.35116e-06	0.00189364	0.0016057	4982/7286/3911/1435/7042/11096/6331/152816/29887/2736/1277/54757/363/7043/8626/7020/5308/80326/2255/947/6899/8600/4488/93650	24
GO:0050804	modulation of chemical synaptic transmission	54/1235	436/18670	6.30761e-06	0.0021008	0.00178136	6900/991/23316/4130/23025/2903/776/2983/9627/9162/134/1815/2904/440279/1949/4355/9254/9370/9699/114/57338/27345/9378/783/2894/5024/784/6532/5021/23228/2912/23542/57537/9465/11178/6507/4983/79772/27253/2918/6865/6543/1268/5913/339302/57616/25769/3815/183/348/2852/93650/4900/2693	54
GO:0099177	regulation of trans-synaptic signaling	54/1235	437/18670	6.74648e-06	0.00212214	0.00179946	6900/991/23316/4130/23025/2903/776/2983/9627/9162/134/1815/2904/440279/1949/4355/9254/9370/9699/114/57338/27345/9378/783/2894/5024/784/6532/5021/23228/2912/23542/57537/9465/11178/6507/4983/79772/27253/2918/6865/6543/1268/5913/339302/57616/25769/3815/183/348/2852/93650/4900/2693	54
GO:0086012	membrane depolarization during cardiac muscle cell action potential	9/1235	23/18670	8.2436e-06	0.00245659	0.00208305	8913/776/6331/783/55800/7871/2702/6330/610	9
GO:0051090	regulation of DNA-binding transcription factor activity	53/1235	432/18670	1.00646e-05	0.00284929	0.00241603	9971/1540/23411/91662/58484/7292/6717/7185/11213/5587/9969/4808/8061/1240/2535/8877/54101/10293/5311/7098/114/64127/3383/26471/10891/5292/23118/2099/28996/5607/1191/7097/56998/83860/8320/7188/5588/8399/3728/219790/4601/3815/8600/7546/4488/4188/60401/183/340061/7128/4760/2307/4825	53
GO:0030517	negative regulation of axon extension	12/1235	42/18670	1.14674e-05	0.00307808	0.00261003	10500/3475/8829/56920/57556/51265/10371/10512/9423/8851/57715/65078	12
GO:0007409	axonogenesis	56/1235	468/18670	1.196e-05	0.00307808	0.00261003	6900/10154/3925/9048/6708/8301/4130/10500/6498/10090/3475/56896/4747/2046/8829/26050/6710/1949/3798/1951/56920/6092/57556/51265/1436/10371/10439/10512/2736/9423/26053/9378/56956/5979/57453/59277/2817/8851/1943/57688/26999/4983/6683/5588/8399/2549/5076/8013/23011/57715/2115/348/65078/7070/5459/4825	56
GO:0007411	axon guidance	38/1235	276/18670	1.40405e-05	0.00345641	0.00293084	6900/10154/9048/6708/10500/56896/2046/8829/6710/1949/3798/1951/56920/6092/57556/1436/10371/10512/2736/9423/9378/56956/5979/57453/59277/2817/8851/1943/57688/26999/4983/5588/8399/2549/8013/57715/2115/5459	38
GO:0097485	neuron projection guidance	38/1235	277/18670	1.52589e-05	0.00350796	0.00297455	6900/10154/9048/6708/10500/56896/2046/8829/6710/1949/3798/1951/56920/6092/57556/1436/10371/10512/2736/9423/9378/56956/5979/57453/59277/2817/8851/1943/57688/26999/4983/5588/8399/2549/8013/57715/2115/5459	38
GO:0090068	positive regulation of cell cycle process	40/1235	298/18670	1.5489e-05	0.00350796	0.00297455	8444/9928/4926/10615/84440/8877/4193/8318/25886/5311/29899/2735/8851/11200/993/11065/995/144455/6683/79915/23476/7161/685/2255/51514/10403/51512/85459/894/9700/51203/9493/7039/4488/6790/1618/9212/1490/26271/4303	40
GO:0051783	regulation of nuclear division	29/1235	188/18670	1.70598e-05	0.0035775	0.00303352	64793/991/1063/701/5347/10274/4926/8877/9232/11065/995/79866/286151/685/10403/54443/9700/51203/7039/84861/9319/4488/4751/6790/126731/10460/1618/9212/26271	29
GO:1903046	meiotic cell cycle process	29/1235	188/18670	1.70598e-05	0.0035775	0.00303352	150280/83990/23397/991/701/5347/4438/9665/9918/151246/9232/4361/245711/993/54456/995/29893/5888/7153/286151/83540/9700/9319/4488/6790/284071/1618/29947/26271	29
GO:0014033	neural crest cell differentiation	18/1235	90/18670	2.06173e-05	0.00402534	0.00341326	4254/10500/3911/9221/8829/6664/56920/57556/10371/10512/5979/2487/84541/5308/80326/157506/57715/6899	18
GO:0051304	chromosome separation	18/1235	90/18670	2.06173e-05	0.00402534	0.00341326	23397/991/1063/701/5347/4438/4926/7156/9918/9232/7153/10403/9700/84861/9319/10460/9212/26271	18
GO:0051590	positive regulation of neurotransmitter transport	11/1235	38/18670	2.31758e-05	0.00437404	0.00370894	23025/776/1815/783/6532/6865/1268/5027/8600/2852/4878	11
GO:0032535	regulation of cellular component size	46/1235	370/18670	2.73082e-05	0.00498771	0.0042293	6900/6708/8301/54551/4703/10500/57482/3475/7248/4747/3778/8829/6710/9535/56920/9026/57556/51265/10371/2055/10439/10512/128239/9423/3383/6558/5979/53841/8851/79822/55604/7111/51334/286527/5027/123720/23011/57715/8800/10677/50853/348/65078/11013/23645/4825	46
GO:0007088	regulation of mitotic nuclear division	26/1235	164/18670	2.82149e-05	0.00499227	0.00423316	64793/991/1063/701/5347/10274/4926/8877/9232/11065/995/79866/685/10403/54443/9700/51203/7039/84861/9319/4751/6790/126731/10460/9212/26271	26
GO:0014031	mesenchymal cell development	17/1235	85/18670	3.47185e-05	0.00595685	0.00505107	4254/10500/3911/9221/8829/6664/56920/57556/10371/10512/5979/84541/5308/23493/157506/57715/6899	17
GO:0072331	signal transduction by p53 class mediator	36/1235	267/18670	3.67995e-05	0.00611101	0.00518179	83990/23411/8444/161742/64782/7023/7156/4839/4193/7862/83667/4361/26471/8851/11200/8626/995/28996/6873/144455/9156/54700/79915/7161/83860/8550/116028/51512/666/60401/6790/1870/387893/8148/50484/9212	36
GO:0033044	regulation of chromosome organization	43/1235	342/18670	3.77756e-05	0.00611101	0.00518179	991/90780/1063/23411/701/5347/29028/5587/9733/4926/6830/4302/9757/54454/1789/8318/9232/26053/56254/4361/26993/10891/4602/4524/5081/7153/23476/144108/7290/142/5588/79829/8550/116028/10403/3720/9700/84861/9319/4751/10460/9212/26271	43
GO:0016571	histone methylation	23/1235	139/18670	4.0366e-05	0.00634867	0.00538331	9971/6018/90780/23411/93166/58508/51742/11108/6830/4302/9757/1789/26053/56254/6304/4602/4524/5081/23476/23512/63976/3720/387893	23
GO:0061098	positive regulation of protein tyrosine kinase activity	13/1235	55/18670	4.63456e-05	0.00671039	0.00569003	2065/51704/134/1436/1741/57091/55294/50507/7039/285489/9094/183/653361	13
GO:0006836	neurotransmitter transport	36/1235	270/18670	4.67056e-05	0.00671039	0.00569003	6571/83733/93664/23025/776/9627/9162/7054/1815/440279/28968/246213/2055/9699/27345/9378/783/6506/6532/8618/6507/79772/6533/3382/6865/1268/6539/6540/5027/339302/8676/54716/8600/6580/2852/4878	36
GO:0061458	reproductive system development	51/1235	434/18670	4.67804e-05	0.00671039	0.00569003	83990/23411/4254/8521/51742/4438/7042/8061/54477/7421/3294/8531/9757/5798/23598/6092/5311/7098/10371/22846/51665/2736/639/9667/3383/6716/91181/56956/2735/6692/26471/7855/8204/8626/2661/2099/2516/144455/2255/8320/9394/23493/157506/1045/10653/666/3815/4188/8743/269/2693	51
GO:0048640	negative regulation of developmental growth	20/1235	113/18670	4.74065e-05	0.00671039	0.00569003	10500/3475/8829/7093/53335/4211/56920/57556/51265/10371/10512/9423/6532/8851/7161/3720/57715/65078/221476/153	20
GO:0001894	tissue homeostasis	32/1235	229/18670	4.86594e-05	0.00671974	0.00569796	4982/9696/1258/57482/1435/4588/166379/84059/1436/29887/2055/64127/387597/7275/56890/25937/8842/25861/55765/50507/5027/2103/53833/947/3549/8600/5166/7128/4069/4760/1490/338773	32
GO:0007051	spindle organization	26/1235	170/18670	5.29718e-05	0.00714111	0.00605525	3925/991/5347/55857/10274/24137/4926/10615/25886/29899/332/11200/6683/79866/83540/10403/9700/8086/9493/54930/4751/6790/126731/10460/9212/26271	26
GO:0008016	regulation of heart contraction	34/1235	251/18670	5.44712e-05	0.00717247	0.00608184	5142/8913/3770/6717/776/134/7042/7054/552/4193/6331/9254/10371/3751/1193/783/55800/784/3781/64091/6543/6548/3728/23493/2702/481/6330/30845/183/59285/3761/1490/4878/153	34
GO:0001508	action potential	22/1235	133/18670	5.91774e-05	0.00761505	0.00645713	8913/6717/776/6331/3751/27345/783/5024/55800/784/7871/3781/1268/6548/3728/2702/481/6330/610/6329/2852/2859	22
GO:1901385	regulation of voltage-gated calcium channel activity	10/1235	35/18670	6.17174e-05	0.00764301	0.00648083	5142/6717/1815/783/784/10681/6236/30845/4878/2859	10
GO:0048545	response to steroid hormone	46/1235	383/18670	6.41304e-05	0.00764301	0.00648083	9971/23411/4747/5069/7042/7054/8061/117144/7421/552/7023/4193/1789/9370/445/1277/9667/3383/114907/7043/10002/5187/5021/8204/8626/10891/5978/167465/2099/2516/1536/7352/7097/153222/1407/142/2103/374/8013/9076/10266/6097/2852/1490/58/2693	46
GO:0050953	sensory perception of light stimulus	31/1235	222/18670	6.42802e-05	0.00764301	0.00648083	3983/1258/50939/1301/6004/7054/4647/51151/84059/2055/6103/1277/10692/783/10002/5470/345193/25861/2918/339302/2570/157506/25769/5076/314/7546/9094/129880/2979/4990/5459	31
GO:0140013	meiotic nuclear division	26/1235	172/18670	6.47941e-05	0.00764301	0.00648083	150280/83990/23397/991/701/5347/4438/9665/151246/9232/4361/245711/54456/29893/5888/7153/286151/83540/9700/9319/4488/6790/284071/1618/29947/26271	26
GO:0032355	response to estradiol	22/1235	134/18670	6.64566e-05	0.00767913	0.00651146	7054/338/1788/1789/445/1277/6532/5021/8204/10891/2099/84660/2255/374/3549/2678/4488/10266/183/2852/1490/2693	22
GO:0014032	neural crest cell development	16/1235	81/18670	6.85204e-05	0.00775925	0.0065794	4254/10500/3911/9221/8829/6664/56920/57556/10371/10512/5979/84541/5308/157506/57715/6899	16
GO:1903522	regulation of blood circulation	38/1235	297/18670	7.19485e-05	0.0079877	0.00677311	5142/8913/3770/6717/776/134/7042/7054/552/4193/6331/9254/10371/3751/1193/27345/3383/783/143872/55800/784/5021/3781/64091/6543/6548/3728/23493/2702/481/6330/30845/183/59285/3761/1490/4878/153	38
GO:0048608	reproductive structure development	50/1235	431/18670	7.67731e-05	0.00835941	0.0070883	83990/23411/4254/8521/51742/4438/7042/8061/7421/3294/8531/9757/5798/23598/6092/5311/7098/10371/22846/51665/2736/639/9667/3383/6716/91181/56956/2735/6692/26471/7855/8204/8626/2661/2099/2516/144455/2255/8320/9394/23493/157506/1045/10653/666/3815/4188/8743/269/2693	50
GO:0035637	multicellular organismal signaling	29/1235	204/18670	7.90971e-05	0.00844996	0.00716508	8913/3770/6717/776/552/6331/9254/3751/27345/783/5024/55800/784/3781/6543/6548/3728/2702/481/6330/30845/183/6329/59285/3761/2852/4878/2693/2859	29
GO:0048562	embryonic organ morphogenesis	37/1235	288/18670	8.16883e-05	0.00856517	0.00726277	123872/57822/1301/7054/4647/2535/10194/6664/5311/9750/2736/9423/57453/2735/7043/2487/7855/7020/28996/25861/6913/2255/9132/157506/3142/5076/8013/220/60529/8463/3549/6899/4188/129880/4760/55897/5459	37
GO:0060485	mesenchyme development	36/1235	279/18670	9.26766e-05	0.00954063	0.00808991	2065/4254/10500/3911/7049/9221/7042/8829/6664/4193/56920/6092/5311/57556/10371/10439/10512/1277/5979/7043/2487/84541/25937/5308/80326/2255/8320/23493/157506/5076/57715/8463/6899/4488/55897/58	36
GO:0033046	negative regulation of sister chromatid segregation	11/1235	44/18670	0.000102345	0.00984746	0.00835008	991/1063/701/5347/9232/10403/9700/84861/9319/9212/26271	11
GO:0031076	embryonic camera-type eye development	10/1235	37/18670	0.000103726	0.00984746	0.00835008	7054/6664/7855/7020/28996/2255/157506/5076/220/3549	10
GO:0086010	membrane depolarization during action potential	10/1235	37/18670	0.000103726	0.00984746	0.00835008	8913/776/6331/783/55800/7871/2702/6330/610/6329	10
GO:0045926	negative regulation of growth	33/1235	249/18670	0.000106875	0.00984746	0.00835008	56649/23411/10500/3475/2786/7042/8829/7093/53335/4211/23677/56920/57556/51265/10371/6595/64061/10512/9423/83667/6532/8851/2487/131566/2661/7161/3720/57715/183/65078/221476/4878/153	33
GO:0051321	meiotic cell cycle	33/1235	249/18670	0.000106875	0.00984746	0.00835008	150280/83990/23397/991/701/5347/4438/4926/9665/7156/9918/151246/9232/4361/245711/993/54456/995/29893/9156/5888/7153/286151/83540/9700/9319/4488/4751/6790/284071/1618/29947/26271	33
GO:0034765	regulation of ion transmembrane transport	54/1235	483/18670	0.000107826	0.00984746	0.00835008	3786/5142/8913/3770/6717/2903/776/4747/3778/1815/117144/2904/3742/6331/9254/5311/3751/1741/1193/57338/8811/5243/783/29850/55800/784/10681/6236/23542/7871/10891/23072/1804/1536/3781/9132/6548/5027/3772/2702/481/6330/5777/610/30845/183/6329/59285/3761/2852/7070/5174/4878/2859	54
GO:0003015	heart process	37/1235	292/18670	0.000108974	0.00984746	0.00835008	5142/8913/3770/6717/776/134/7042/7054/552/4193/6331/9254/10371/3751/1193/783/55800/784/25937/5608/3781/64091/50507/6543/6548/3728/23493/2702/481/6330/30845/183/59285/3761/1490/4878/153	37
GO:0007601	visual perception	30/1235	218/18670	0.000109571	0.00984746	0.00835008	3983/1258/50939/1301/6004/7054/4647/51151/84059/2055/6103/1277/10692/783/10002/5470/345193/2918/339302/2570/157506/25769/5076/314/7546/9094/129880/2979/4990/5459	30
GO:0035176	social behavior	12/1235	52/18670	0.000115657	0.0102321	0.00867621	7054/1815/552/2055/1620/139411/9378/2894/6532/5021/23542/6899	12
GO:0060249	anatomical structure homeostasis	50/1235	439/18670	0.000121573	0.0104572	0.00886708	4982/9696/4130/1258/57482/776/1435/134/4588/166379/84059/1436/29887/2055/201516/64127/387597/783/7275/4361/56890/25937/8842/25861/55765/9156/5888/4753/50507/1268/142/5588/8550/5027/2103/53833/947/3549/8600/4751/5166/7128/4069/9212/4760/1490/8361/338773/8365/8362	50
GO:0071229	cellular response to acid chemical	29/1235	209/18670	0.000122273	0.0104572	0.00886708	9971/7292/5244/552/338/1788/53335/23677/5311/19/1620/445/1277/83667/5979/4313/6532/10891/1536/4602/7525/6470/5076/9076/8463/6899/84861/5166/1291	29
GO:0048864	stem cell development	16/1235	85/18670	0.000125016	0.0104572	0.00886708	4254/10500/3911/9221/8829/6664/56920/57556/10371/10512/5979/84541/5308/157506/57715/6899	16
GO:0007143	female meiotic nuclear division	9/1235	31/18670	0.000125595	0.0104572	0.00886708	23397/5347/9665/7153/9319/6790/284071/1618/26271	9
GO:0051985	negative regulation of chromosome segregation	11/1235	45/18670	0.000127436	0.0104572	0.00886708	991/1063/701/5347/9232/10403/9700/84861/9319/9212/26271	11
GO:1901796	regulation of signal transduction by p53 class mediator	26/1235	180/18670	0.000139389	0.0112746	0.00956018	83990/23411/8444/161742/7156/4839/4193/7862/4361/8851/11200/8626/28996/6873/9156/54700/79915/7161/83860/8550/116028/6790/387893/8148/50484/9212	26
GO:0050771	negative regulation of axonogenesis	14/1235	69/18670	0.000142187	0.0113389	0.00961473	10500/3475/8829/1949/56920/57556/51265/10371/10512/9423/8851/57715/65078/7070	14
GO:2000816	negative regulation of mitotic sister chromatid separation	10/1235	39/18670	0.000167712	0.0131261	0.0111302	991/1063/701/5347/9232/10403/84861/9319/9212/26271	10
GO:0051703	intraspecies interaction between organisms	12/1235	54/18670	0.000170025	0.0131261	0.0111302	7054/1815/552/2055/1620/139411/9378/2894/6532/5021/23542/6899	12
GO:1905818	regulation of chromosome separation	13/1235	62/18670	0.000172233	0.0131261	0.0111302	991/1063/701/5347/4926/9232/10403/9700/84861/9319/10460/9212/26271	13
GO:0001101	response to acid chemical	41/1235	343/18670	0.000173871	0.0131261	0.0111302	9971/7292/5244/7049/7054/552/3294/338/1788/53335/23677/9370/5311/19/1620/445/1277/3383/83667/5979/1571/6506/4313/6532/10891/1536/4602/7525/1592/4524/7097/6470/84918/5076/9076/8463/6899/84861/5166/1490/1291	41
GO:0007611	learning or memory	33/1235	256/18670	0.000181644	0.0134289	0.011387	6900/8301/23316/4130/23259/2903/9162/7054/8061/2904/9757/2055/114/1620/2334/57338/8811/9378/6532/5021/23542/7097/6865/6543/1268/25769/8086/3815/183/348/10882/4900/2693	33
GO:0050770	regulation of axonogenesis	26/1235	183/18670	0.000182911	0.0134289	0.011387	6900/10154/10500/6498/10090/3475/4747/8829/1949/56920/6092/57556/51265/10371/10439/10512/9423/5979/8851/57688/23011/57715/348/65078/7070/4825	26
GO:0060560	developmental growth involved in morphogenesis	31/1235	235/18670	0.000185622	0.0134289	0.011387	10500/3475/23025/1435/8829/53335/56920/57556/51265/10371/9699/10439/10512/9423/26053/8851/26999/2099/55083/2255/2016/157506/374/23011/57715/6790/348/65078/55897/5459/4825	31
GO:0001822	kidney development	35/1235	278/18670	0.00018737	0.0134289	0.011387	90780/1063/3911/7248/342372/7042/8829/7704/4854/6664/6092/9370/5311/445/2736/5979/25937/51301/8842/7020/55083/1592/285/38/7161/56998/2255/4091/23210/157506/5076/947/4072/183/50484	35
GO:0048596	embryonic camera-type eye morphogenesis	8/1235	26/18670	0.000191048	0.0135214	0.0114654	7054/6664/7855/7020/28996/5076/220/3549	8
GO:0071902	positive regulation of protein serine/threonine kinase activity	40/1235	334/18670	0.000199325	0.0139331	0.0118145	2081/23411/4254/142679/134/60370/1815/9043/9370/5311/1436/64127/128239/54757/5979/9802/7043/8851/376497/245711/152110/7855/200958/23118/5607/55765/5608/7161/50507/2255/7164/8550/5027/8817/894/9020/7039/905/3815/8600	40
GO:0043954	cellular component maintenance	12/1235	55/18670	0.00020454	0.0141232	0.0119757	144100/2904/6830/1436/1741/6832/25861/4983/55765/4524/348/10882	12
GO:1905819	negative regulation of chromosome separation	10/1235	40/18670	0.000210485	0.0143586	0.0121753	991/1063/701/5347/9232/10403/84861/9319/9212/26271	10
GO:0060603	mammary gland duct morphogenesis	9/1235	33/18670	0.00021309	0.0143633	0.0121793	1435/7421/1436/2736/9423/2099/2255/374/4488	9
GO:0042472	inner ear morphogenesis	17/1235	98/18670	0.000220202	0.014668	0.0124377	57822/1301/4647/2535/9750/2736/9423/2487/7020/25861/2255/9132/5076/8013/220/6899/5459	17
GO:0061180	mammary gland epithelium development	14/1235	72/18670	0.000228249	0.0147303	0.0124905	9914/90780/1435/7421/1436/2736/128239/9423/2099/3664/2255/374/8600/4488	14
GO:0036293	response to decreased oxygen levels	43/1235	370/18670	0.000228291	0.0147303	0.0124905	83990/4352/23411/5708/7248/3778/7049/134/7042/7054/1788/4193/1789/9370/132864/3751/1387/3383/5024/784/7043/4313/6532/5021/10891/5978/28996/1536/4602/4524/7352/7097/285/51129/50507/6548/6513/481/947/10266/5313/1490/4878	43
GO:0010639	negative regulation of organelle organization	45/1235	393/18670	0.000230982	0.0147303	0.0124905	3925/991/6708/1063/23411/701/5347/57482/29028/6710/255027/140775/6830/4302/9535/54454/1789/9026/9232/56890/26586/26471/79822/10891/55604/7111/1191/7153/157922/286151/395/286527/142/10403/3720/9700/10677/666/84861/50853/9319/4751/9212/11013/26271	45
GO:0002063	chondrocyte development	11/1235	48/18670	0.000236261	0.0147303	0.0124905	1301/1293/1292/25886/176/8817/51320/4488/51435/1291/5744	11
GO:0030308	negative regulation of cell growth	26/1235	186/18670	0.000238108	0.0147303	0.0124905	23411/10500/3475/2786/7042/8829/53335/23677/56920/57556/51265/10371/6595/64061/10512/9423/83667/8851/2487/131566/2661/57715/183/65078/221476/4878	26
GO:0086070	SA node cell to atrial cardiac muscle cell communication	5/1235	10/18670	0.000239051	0.0147303	0.0124905	8913/776/6331/55800/2702	5
GO:0061337	cardiac conduction	22/1235	146/18670	0.000240468	0.0147303	0.0124905	8913/3770/6717/776/6331/9254/3751/783/55800/784/3781/6543/6548/3728/2702/481/6330/30845/183/59285/3761/4878	22
GO:0070482	response to oxygen levels	45/1235	394/18670	0.000244513	0.0147303	0.0124905	83990/4352/23411/5708/7248/3778/7049/134/7042/7054/1788/4193/1789/9370/132864/3751/5423/1387/1277/3383/5024/784/7043/4313/6532/5021/10891/5978/28996/1536/4602/4524/7352/7097/285/51129/50507/6548/6513/481/947/10266/5313/1490/4878	45
GO:1901841	regulation of high voltage-gated calcium channel activity	6/1235	15/18670	0.000246421	0.0147303	0.0124905	5142/6717/783/784/6236/4878	6
GO:0060047	heart contraction	35/1235	282/18670	0.000247153	0.0147303	0.0124905	5142/8913/3770/6717/776/134/7042/7054/552/4193/6331/9254/10371/3751/1193/783/55800/784/5608/3781/64091/6543/6548/3728/23493/2702/481/6330/30845/183/59285/3761/1490/4878/153	35
GO:0006814	sodium ion transport	29/1235	218/18670	0.000255481	0.0150681	0.0127769	1815/4302/389015/64849/246213/6331/5311/6558/29850/55800/6553/146167/5187/7226/7871/23072/10568/6543/9962/6548/5027/125206/25769/481/6330/6520/610/6329/347051	29
GO:0007435	salivary gland morphogenesis	9/1235	34/18670	0.000272939	0.0159318	0.0135092	3911/7042/8829/10371/5423/10512/59277/7043/2255	9
GO:0031060	regulation of histone methylation	13/1235	65/18670	0.000282979	0.0162595	0.0137871	90780/23411/6830/4302/9757/1789/26053/56254/4602/4524/5081/23476/3720	13
GO:0001755	neural crest cell migration	12/1235	57/18670	0.000291716	0.0162595	0.0137871	4254/10500/3911/8829/56920/57556/10371/10512/5979/5308/57715/6899	12
GO:0010965	regulation of mitotic sister chromatid separation	12/1235	57/18670	0.000291716	0.0162595	0.0137871	991/1063/701/5347/9232/10403/9700/84861/9319/10460/9212/26271	12
GO:0050806	positive regulation of synaptic transmission	24/1235	168/18670	0.000292911	0.0162595	0.0137871	23316/23025/2903/776/134/1815/2904/4355/9699/114/9378/783/784/5021/6507/6865/6543/1268/5913/57616/25769/348/2852/4900	24
GO:1990138	neuron projection extension	24/1235	168/18670	0.000292911	0.0162595	0.0137871	10500/3475/23025/8829/53335/56920/57556/51265/10371/9699/10439/10512/9423/26053/8851/26999/2016/23011/57715/6790/348/65078/5459/4825	24
GO:0048762	mesenchymal cell differentiation	29/1235	220/18670	0.000298603	0.0164145	0.0139185	4254/10500/3911/7049/9221/7042/8829/6664/56920/57556/10371/10439/10512/1277/5979/7043/2487/84541/25937/5308/80326/2255/8320/23493/157506/5076/57715/6899/4488	29
GO:0050890	cognition	36/1235	296/18670	0.000301891	0.0164357	0.0139365	6900/8301/23316/4130/9980/23259/2903/9162/134/7054/8061/2904/9757/2055/114/1620/139411/2334/57338/8811/9378/6532/5021/23542/7097/6865/6543/1268/25769/8086/3815/183/348/10882/4900/2693	36
GO:0009612	response to mechanical stimulus	28/1235	210/18670	0.000311597	0.0168025	0.0142476	342372/1301/8061/5493/5311/7098/84059/9750/1277/9378/5024/784/6507/25861/285/6548/5027/3728/84918/6513/9020/3549/3815/2115/183/8795/4878/58	28
GO:0070588	calcium ion transmembrane transport	38/1235	319/18670	0.000316442	0.0168968	0.0143275	9914/5142/8913/6717/2903/342372/776/1815/117144/2904/9254/5311/1193/140803/57338/783/29850/784/10681/6236/7226/55013/6543/55283/6548/159371/5027/25769/481/5777/30845/24145/79568/59285/2852/7070/4878/2859	38
GO:0002027	regulation of heart rate	17/1235	101/18670	0.000319315	0.0168968	0.0143275	8913/6717/776/552/4193/6331/10371/783/55800/64091/3728/23493/2702/6330/183/4878/153	17
GO:0033048	negative regulation of mitotic sister chromatid segregation	10/1235	42/18670	0.000323766	0.0169737	0.0143928	991/1063/701/5347/9232/10403/84861/9319/9212/26271	10
GO:0046942	carboxylic acid transport	39/1235	331/18670	0.000331856	0.0172383	0.0146171	83733/9971/11136/5172/5244/134/118980/1815/552/253512/634/64849/246213/32/117247/2055/6506/65012/146167/376497/2912/200931/6507/5608/6533/9962/6539/6540/5027/8399/6520/23539/54716/8600/1468/183/348/50487/2352	39
GO:0050858	negative regulation of antigen receptor-mediated signaling pathway	8/1235	28/18670	0.000337576	0.0173759	0.0147338	634/23228/11126/9404/5777/11314/933/7070	8
GO:0043433	negative regulation of DNA-binding transcription factor activity	24/1235	170/18670	0.000350226	0.017755	0.0150552	9971/1540/23411/91662/7292/6717/11213/9969/1240/10293/5311/26471/5292/2099/5607/56998/83860/8320/8399/4601/4488/4188/7128/2307	24
GO:0035725	sodium ion transmembrane transport	21/1235	140/18670	0.000351211	0.017755	0.0150552	1815/389015/6331/5311/6558/29850/55800/6553/7226/7871/23072/10568/6543/6548/125206/25769/481/6330/6520/610/6329	21
GO:0003281	ventricular septum development	14/1235	75/18670	0.000355749	0.0178252	0.0151148	7049/7042/2535/6664/4052/4193/6092/639/129446/4091/161882/23493/2702/8543	14
GO:0044839	cell cycle G2/M phase transition	33/1235	266/18670	0.000369374	0.0183456	0.015556	1063/5347/5708/8444/9928/22897/1112/5243/4361/9133/26993/11200/152110/993/995/6873/9833/54820/7465/79866/79915/23476/7164/51514/2103/51512/84142/54930/4751/6790/9212/26271/4303	33
GO:0015849	organic acid transport	39/1235	333/18670	0.000374626	0.0184446	0.01564	83733/9971/11136/5172/5244/134/118980/1815/552/253512/634/64849/246213/32/117247/2055/6506/65012/146167/376497/2912/200931/6507/5608/6533/9962/6539/6540/5027/8399/6520/23539/54716/8600/1468/183/348/50487/2352	39
GO:0048588	developmental cell growth	30/1235	234/18670	0.000383772	0.018732	0.0158837	10500/3475/23025/8829/53335/56920/8470/57556/51265/10371/9699/10439/10512/9423/26053/8851/2661/26999/2016/23011/57715/51320/6790/183/348/65078/221476/4878/5459/4825	30
GO:0003279	cardiac septum development	18/1235	112/18670	0.000387837	0.0187687	0.0159148	7049/7042/8829/2535/6664/4052/4193/6092/10512/639/129446/4091/161882/23493/2702/6899/4488/8543	18
GO:0090596	sensory organ morphogenesis	32/1235	256/18670	0.000393569	0.0188846	0.0160131	57822/2195/1301/7054/4647/2535/10194/6664/4211/55764/9750/2736/9423/639/10002/54549/2487/7855/8842/7020/5308/28996/25861/2255/9132/5076/8013/220/3549/6899/7070/5459	32
GO:0051983	regulation of chromosome segregation	17/1235	103/18670	0.000405065	0.0192319	0.0163075	991/1063/701/5347/4926/10615/9232/11004/116028/10403/9700/84861/9319/4751/10460/9212/26271	17
GO:0060411	cardiac septum morphogenesis	14/1235	76/18670	0.000409958	0.0192319	0.0163075	7049/7042/8829/2535/6664/4193/6092/10512/4091/161882/23493/2702/6899/4488	14
GO:0086016	AV node cell action potential	5/1235	11/18670	0.000414392	0.0192319	0.0163075	8913/6331/783/2702/6330	5
GO:0086027	AV node cell to bundle of His cell signaling	5/1235	11/18670	0.000414392	0.0192319	0.0163075	8913/6331/783/2702/6330	5
GO:0045841	negative regulation of mitotic metaphase/anaphase transition	9/1235	36/18670	0.000434598	0.0200057	0.0169637	991/1063/701/5347/10403/84861/9319/9212/26271	9
GO:0035265	organ growth	27/1235	204/18670	0.00044494	0.0203165	0.0172273	7049/7042/4322/8531/4211/1293/1292/32/9254/25886/8470/2735/6532/5292/2099/7161/2255/3720/23493/3142/4488/51435/183/221476/55897/4878/1291	27
GO:0033047	regulation of mitotic sister chromatid segregation	13/1235	68/18670	0.000449481	0.0203597	0.0172638	991/1063/701/5347/4926/9232/10403/9700/84861/9319/10460/9212/26271	13
GO:0051306	mitotic sister chromatid separation	12/1235	60/18670	0.000480373	0.0215718	0.0182916	991/1063/701/5347/9232/10403/9700/84861/9319/10460/9212/26271	12
GO:0030225	macrophage differentiation	10/1235	44/18670	0.00048386	0.0215718	0.0182916	23411/1435/9370/133396/1436/7097/146433/375387/142/27102	10
GO:0072001	renal system development	35/1235	293/18670	0.000508525	0.0224943	0.0190739	90780/1063/3911/7248/342372/7042/8829/7704/4854/6664/6092/9370/5311/445/2736/5979/25937/51301/8842/7020/55083/1592/285/38/7161/56998/2255/4091/23210/157506/5076/947/4072/183/50484	35
GO:0006352	DNA-templated transcription, initiation	31/1235	249/18670	0.000515805	0.0226395	0.019197	2965/9971/9969/8061/7421/51773/4854/1387/2959/10002/25937/10891/2099/6873/2516/54700/56998/83860/2103/23493/8013/8463/1810/1870/6097/8148/1490/8361/4878/8365/8362	31
GO:0060537	muscle tissue development	45/1235	408/18670	0.000524908	0.0226878	0.019238	1063/2065/4703/56999/3475/7248/7049/1301/7042/7093/9318/8531/6664/4211/5311/8470/9750/9734/10512/55553/129446/2735/2817/26471/10891/5292/5081/64091/7161/50507/8320/6548/161882/3720/23493/3142/2702/905/3549/6899/183/221476/55897/4878/58	45
GO:0030516	regulation of axon extension	16/1235	96/18670	0.000530379	0.0226878	0.019238	10500/3475/8829/56920/57556/51265/10371/10439/10512/9423/8851/23011/57715/348/65078/4825	16
GO:0008406	gonad development	28/1235	217/18670	0.00053282	0.0226878	0.019238	83990/23411/4254/51742/4438/7042/8531/9757/5798/23598/6092/7098/10371/9667/3383/6716/91181/56956/26471/8204/2661/2099/2516/157506/666/3815/8743/269	28
GO:0072332	intrinsic apoptotic signaling pathway by p53 class mediator	14/1235	78/18670	0.000539744	0.0226878	0.019238	23411/64782/4193/26471/11200/8626/28996/54700/79915/7161/666/60401/1870/50484	14
GO:0007431	salivary gland development	9/1235	37/18670	0.00054095	0.0226878	0.019238	3911/7042/8829/10371/5423/10512/59277/7043/2255	9
GO:1902100	negative regulation of metaphase/anaphase transition of cell cycle	9/1235	37/18670	0.00054095	0.0226878	0.019238	991/1063/701/5347/10403/84861/9319/9212/26271	9
GO:0048705	skeletal system morphogenesis	30/1235	239/18670	0.000549056	0.0228585	0.0193827	158326/1301/4322/4665/6664/1293/1292/25886/1112/1277/57453/7043/4313/9496/7020/6913/8538/5027/176/8817/157506/60529/3549/6899/4488/4188/51435/1490/338773/1291	30
GO:0061082	myeloid leukocyte cytokine production	8/1235	30/18670	0.000564723	0.0231061	0.0195926	23411/51704/11213/7042/7043/8013/9188/3815	8
GO:0001889	liver development	20/1235	135/18670	0.000565684	0.0231061	0.0195926	123872/9480/7049/634/5311/445/55679/2735/2487/55294/144455/38/3720/3142/9076/570/3549/6790/7128/55897	20
GO:0007605	sensory perception of sound	21/1235	145/18670	0.000567246	0.0231061	0.0195926	4640/5172/776/1301/7054/7007/4647/246213/84059/9750/1277/3383/7275/332/7020/6507/25861/9132/6899/3815/5459	21
GO:0007517	muscle organ development	45/1235	410/18670	0.000582586	0.0235615	0.0199788	1063/23411/2065/22801/4703/10290/3911/6717/7049/1301/7042/7093/9318/2535/8531/6664/4211/1293/9750/9734/445/55553/129446/2735/2817/26471/51460/5292/4621/5081/64091/7161/8320/161882/3720/23493/3142/60529/493829/905/6899/2115/221476/58/4303	45
GO:0006816	calcium ion transport	47/1235	434/18670	0.000597234	0.0239826	0.0203358	9914/5142/8913/6717/2903/342372/776/283229/1815/117144/2904/7421/9254/5311/1193/140803/57338/3383/783/29850/5024/784/10681/6236/7226/55013/6543/55283/6548/159371/5027/25769/481/6520/5777/9454/30845/10266/183/24145/79568/59285/2852/7070/1490/4878/2859	47
GO:0048167	regulation of synaptic plasticity	25/1235	187/18670	0.00061269	0.0242504	0.0205629	6900/991/4130/23025/2903/9162/134/2904/440279/4355/9699/114/57338/5024/57537/11178/79772/6543/57616/25769/3815/183/348/93650/4900	25
GO:0001655	urogenital system development	38/1235	330/18670	0.000614029	0.0242504	0.0205629	90780/1063/3911/7248/342372/7042/8829/7704/4854/6664/6092/9370/5311/445/2736/5979/2735/25937/8626/51301/8842/7020/2099/55083/1592/285/38/7161/56998/2255/4091/23210/157506/5076/947/4072/183/50484	38
GO:0003151	outflow tract morphogenesis	14/1235	79/18670	0.000616753	0.0242504	0.0205629	7049/7042/8829/2535/6664/6092/10512/5308/4091/161882/23493/2702/6899/4488	14
GO:0006367	transcription initiation from RNA polymerase II promoter	25/1235	188/18670	0.000663309	0.0258744	0.02194	2965/9971/9969/7421/4854/1387/2959/10002/25937/10891/2099/6873/2516/56998/83860/2103/23493/8013/8463/1810/1870/6097/8148/1490/4878	25
GO:0045494	photoreceptor cell maintenance	9/1235	38/18670	0.000667712	0.0258744	0.02194	9696/1258/166379/84059/2055/7275/56890/8842/2103	9
GO:0086067	AV node cell to bundle of His cell communication	5/1235	12/18670	0.000671765	0.0258744	0.02194	8913/6331/783/2702/6330	5
GO:2000027	regulation of animal organ morphogenesis	31/1235	253/18670	0.000676516	0.0258813	0.0219459	4982/57822/5708/1952/1435/7042/7421/2535/634/1951/6092/152816/10512/166336/55679/2735/59277/51339/7855/55294/7020/5292/2099/80326/2255/5076/947/6899/183/7128/55897	31
GO:0001505	regulation of neurotransmitter levels	40/1235	355/18670	0.00068956	0.0258877	0.0219513	6571/93664/23025/2903/776/9627/9162/7054/1815/440279/5311/2055/9699/445/27345/3383/9378/783/6506/6532/8618/6507/79772/1191/1119/7097/6865/133121/1268/5027/6470/26227/339302/26002/570/8676/947/7915/183/2852	40
GO:1901019	regulation of calcium ion transmembrane transporter activity	15/1235	89/18670	0.000693673	0.0258877	0.0219513	5142/6717/1815/5311/1193/57338/783/784/10681/6236/6548/481/30845/4878/2859	15
GO:0062009	secondary palate development	7/1235	24/18670	0.000694514	0.0258877	0.0219513	7049/7042/2535/10194/6664/7043/6899	7
GO:0007091	metaphase/anaphase transition of mitotic cell cycle	11/1235	54/18670	0.000694971	0.0258877	0.0219513	991/1063/701/5347/10403/9700/84861/9319/10460/9212/26271	11
GO:0033045	regulation of sister chromatid segregation	14/1235	80/18670	0.000702876	0.0259061	0.0219669	991/1063/701/5347/4926/9232/116028/10403/9700/84861/9319/10460/9212/26271	14
GO:0022602	ovulation cycle process	10/1235	46/18670	0.000704617	0.0259061	0.0219669	23411/7042/5798/6092/7043/8204/2661/2099/2516/5608	10
GO:0051225	spindle assembly	17/1235	108/18670	0.0007109	0.0259685	0.0220198	991/5347/10274/24137/4926/10615/29899/332/11200/8086/9493/54930/4751/6790/126731/9212/26271	17
GO:0032147	activation of protein kinase activity	38/1235	333/18670	0.000729651	0.0261328	0.0221591	2081/51704/142679/9928/134/7042/60370/1815/9043/80122/7098/114/64127/128239/5979/7043/8851/245711/200958/23118/5607/55765/5608/79866/9966/7161/133619/2255/8550/5027/9020/7039/3815/8600/183/9618/11314/8795	38
GO:0042471	ear morphogenesis	18/1235	118/18670	0.000736774	0.0261328	0.0221591	57822/1301/4647/2535/10194/9750/2736/9423/2487/7020/25861/2255/9132/5076/8013/220/6899/5459	18
GO:0006479	protein methylation	24/1235	179/18670	0.00074784	0.0261328	0.0221591	9971/6018/90780/23411/93166/58508/51742/11108/6830/4302/9757/1789/26053/56254/6304/4602/4524/5081/23476/2107/23512/63976/3720/387893	24
GO:0008213	protein alkylation	24/1235	179/18670	0.00074784	0.0261328	0.0221591	9971/6018/90780/23411/93166/58508/51742/11108/6830/4302/9757/1789/26053/56254/6304/4602/4524/5081/23476/2107/23512/63976/3720/387893	24
GO:0008361	regulation of cell size	24/1235	179/18670	0.00074784	0.0261328	0.0221591	10500/3475/7248/3778/8829/56920/57556/51265/10371/2055/10439/10512/128239/9423/6558/5979/8851/51334/5027/23011/57715/348/65078/4825	24
GO:0001708	cell fate specification	16/1235	99/18670	0.000751456	0.0261328	0.0221591	9095/8829/2736/55553/9496/6913/8320/5076/30009/3549/6899/8543/3110/55897/54738/4825	16
GO:0008584	male gonad development	20/1235	138/18670	0.000752323	0.0261328	0.0221591	83990/4254/51742/7042/8531/23598/7098/10371/9667/3383/6716/91181/56956/26471/2099/2516/666/3815/8743/269	20
GO:0061008	hepaticobiliary system development	20/1235	138/18670	0.000752323	0.0261328	0.0221591	123872/9480/7049/634/5311/445/55679/2735/2487/55294/144455/38/3720/3142/9076/570/3549/6790/7128/55897	20
GO:0031667	response to nutrient levels	52/1235	499/18670	0.000771492	0.0266353	0.0225852	4982/9971/83990/353500/462/23411/3360/93664/7248/167359/5587/81788/7054/7421/81929/1788/64241/53335/4193/1789/32/9370/19/445/64127/1277/3383/83667/5024/784/6532/10891/5292/1536/1592/4524/7352/38/1268/5027/594/84918/5076/6513/5166/5313/24145/348/27102/2693/153/4303	52
GO:0110110	positive regulation of animal organ morphogenesis	14/1235	81/18670	0.000798955	0.0274163	0.0232474	1435/7042/7421/6092/152816/10512/7020/5292/2255/5076/947/183/7128/55897	14
GO:0045137	development of primary sexual characteristics	28/1235	223/18670	0.000822068	0.0279821	0.0237272	83990/23411/4254/51742/4438/7042/8531/9757/5798/23598/6092/7098/10371/9667/3383/6716/91181/56956/26471/8204/2661/2099/2516/157506/666/3815/8743/269	28
GO:0046546	development of primary male sexual characteristics	20/1235	139/18670	0.000825328	0.0279821	0.0237272	83990/4254/51742/7042/8531/23598/7098/10371/9667/3383/6716/91181/56956/26471/2099/2516/666/3815/8743/269	20
GO:0022600	digestive system process	16/1235	100/18670	0.000840746	0.0283351	0.0240266	57482/4588/7421/64241/389015/9026/29887/5733/64127/29881/5021/55765/2255/6518/4760/2693	16
GO:0046661	male sex differentiation	22/1235	160/18670	0.00086881	0.0289365	0.0245365	83990/4254/51742/7042/8531/23598/7098/10371/51665/9667/3383/6716/91181/56956/26471/2099/2516/2255/666/3815/8743/269	22
GO:2000241	regulation of reproductive process	22/1235	160/18670	0.00086881	0.0289365	0.0245365	991/5016/8521/10371/26471/5021/993/2661/995/2099/136242/2516/286151/6865/1268/9319/4488/2683/6790/284071/1618/26271	22
GO:0008608	attachment of spindle microtubules to kinetochore	8/1235	32/18670	0.000901765	0.0294176	0.0249444	57082/10615/81929/11004/83540/10403/4751/9212	8
GO:0051385	response to mineralocorticoid	8/1235	32/18670	0.000901765	0.0294176	0.0249444	4747/7054/8061/552/1536/142/2852/1490	8
GO:0086019	cell-cell signaling involved in cardiac conduction	8/1235	32/18670	0.000901765	0.0294176	0.0249444	8913/776/6331/783/55800/3781/2702/6330	8
GO:0048839	inner ear development	25/1235	192/18670	0.000904037	0.0294176	0.0249444	57822/1301/7042/4647/2535/246213/84059/9750/2736/9423/7043/2487/7020/25861/2255/55283/9132/2103/23493/5076/8013/220/6899/4760/5459	25
GO:0043405	regulation of MAP kinase activity	38/1235	337/18670	0.000913517	0.0295562	0.025062	2081/4254/142679/11213/134/60370/1815/161742/9043/1844/9370/64127/128239/5979/7043/152110/7855/200958/5470/23118/5607/55765/5608/7161/50507/2255/7164/80824/8550/5027/8817/5777/9020/7039/3815/8600/11314/348	38
GO:0044784	metaphase/anaphase transition of cell cycle	11/1235	56/18670	0.000957579	0.0304596	0.025828	991/1063/701/5347/10403/9700/84861/9319/10460/9212/26271	11
GO:0086065	cell communication involved in cardiac conduction	11/1235	56/18670	0.000957579	0.0304596	0.025828	8913/6717/776/6331/783/55800/3781/3728/2702/481/6330	11
GO:0090307	mitotic spindle assembly	11/1235	56/18670	0.000957579	0.0304596	0.025828	991/5347/10274/24137/332/11200/8086/9493/4751/126731/9212	11
GO:0051098	regulation of binding	41/1235	373/18670	0.000971094	0.030717	0.0260462	1540/3925/90780/6708/5347/6717/7049/8829/9044/51773/4140/7023/6664/285381/9026/9370/9750/1193/2959/51339/79822/23228/55294/28996/5081/56998/142/161882/23493/8600/4488/4188/4751/6790/9618/348/4242/340061/3433/9212/4760	41
GO:0048675	axon extension	18/1235	121/18670	0.000994852	0.0312936	0.0265352	10500/3475/8829/56920/57556/51265/10371/10439/10512/9423/26053/8851/23011/57715/348/65078/5459/4825	18
GO:0031960	response to corticosteroid	22/1235	162/18670	0.00102671	0.0321173	0.0272336	4747/5069/7054/8061/552/7023/1789/9370/445/1277/3383/114907/5978/1536/7352/153222/142/374/9076/2852/1490/2693	22
GO:0086003	cardiac muscle cell contraction	13/1235	74/18670	0.00103766	0.0321268	0.0272417	5142/8913/6717/776/134/6331/783/55800/3781/6548/3728/2702/6330	13
GO:0051260	protein homooligomerization	39/1235	351/18670	0.001042	0.0321268	0.0272417	58484/440193/3742/4355/9043/7083/32/9370/5311/9750/3751/286133/114/158158/6506/5024/7450/6532/7226/8626/200958/1191/6683/5888/38/51129/6470/23210/220/9076/10938/493829/30845/8600/7915/2683/6580/348/974	39
GO:0002367	cytokine production involved in immune response	16/1235	102/18670	0.0010466	0.0321268	0.0272417	23411/51704/7292/11213/7042/7098/64127/7043/7855/55765/11126/7097/8013/9188/30009/3815	16
GO:0045165	cell fate commitment	32/1235	271/18670	0.00105077	0.0321268	0.0272417	1540/9480/9095/8521/3475/4063/9580/8829/4854/2736/639/55553/57453/9496/5081/80326/6913/2255/8320/161882/23493/5076/30009/3549/6899/8543/6097/3110/4760/55897/54738/4825	32
GO:0006936	muscle contraction	40/1235	363/18670	0.00106106	0.0321268	0.0272417	5142/8913/4703/6717/776/3778/134/8877/6331/1193/5733/8811/783/5024/143872/55800/23336/5021/7871/7111/4621/5608/3781/6865/6548/3728/2702/481/6330/493829/30845/3815/183/6329/2852/10174/1490/4878/58/2693	40
GO:0018108	peptidyl-tyrosine phosphorylation	40/1235	363/18670	0.00106106	0.0321268	0.0272417	2065/4254/51704/8444/22853/2046/134/8829/9370/133396/1436/1741/3595/3383/5979/3263/57091/64092/55294/9833/5607/5608/7525/5168/7465/10420/50507/2255/374/5777/7039/285489/7294/3815/9094/183/11314/653361/7070/1195	40
GO:0000075	cell cycle checkpoint	27/1235	216/18670	0.00107947	0.032424	0.0274937	83990/991/1063/701/5347/51322/6664/4193/8318/1112/65975/4361/11200/995/144455/7465/7153/1407/51514/10403/51512/84861/84142/9319/6790/9212/4303	27
GO:0009914	hormone transport	36/1235	317/18670	0.00108233	0.032424	0.0274937	91608/9971/353500/6717/776/134/55107/6664/5798/9254/9370/117247/9699/114/387597/338442/5978/2661/4602/3382/6865/1407/1268/5991/6513/8425/8600/183/2852/7276/4760/388581/4878/2693/4825/389692	36
GO:0040001	establishment of mitotic spindle localization	8/1235	33/18670	0.00112214	0.0334398	0.028355	5347/4926/29899/54820/2255/10403/9700/51203	8
GO:0051091	positive regulation of DNA-binding transcription factor activity	31/1235	261/18670	0.00113428	0.0335975	0.0284888	58484/7185/11213/5587/4808/8061/2535/8877/54101/7098/114/64127/3383/10891/23118/2099/28996/1191/7097/7188/5588/3728/219790/3815/8600/7546/60401/183/340061/4760/4825	31
GO:0051492	regulation of stress fiber assembly	14/1235	84/18670	0.00115615	0.0335975	0.0284888	3925/22843/22998/7248/8829/55616/7043/79822/55604/395/50507/6548/10174/1490	14
GO:0021700	developmental maturation	33/1235	284/18670	0.00116482	0.0335975	0.0284888	6900/991/8301/23025/4747/2046/9928/7042/440279/53335/5798/84966/9378/84283/5979/59277/4313/8851/7855/5991/23787/5076/79670/5064/3549/9319/4488/6790/10882/1618/54738/26271/4825	33
GO:0016049	cell growth	50/1235	484/18670	0.00116536	0.0335975	0.0284888	23411/10500/3475/23025/2786/9928/7042/8829/552/8877/634/53335/23677/56920/8470/57556/51265/10371/9699/6595/10439/64061/10512/9423/26053/83667/6832/8851/2487/131566/2661/26999/5607/6548/5588/2016/23011/57715/51320/8425/84861/6790/183/348/65078/221476/27346/4878/5459/4825	50
GO:0003012	muscle system process	49/1235	472/18670	0.00116997	0.0335975	0.0284888	5142/8913/4703/6717/776/3778/134/8877/6331/8470/1193/5733/8811/114907/783/5024/143872/55800/23336/5021/29995/7871/10891/7111/4621/5608/3781/6865/6548/142/3728/3720/23493/8013/2702/481/6330/493829/30845/3815/183/6329/2852/221476/10174/1490/4878/58/2693	49
GO:0003171	atrioventricular valve development	7/1235	26/18670	0.0011749	0.0335975	0.0284888	7042/4193/10439/4091/161882/23493/2702	7
GO:0048843	negative regulation of axon extension involved in axon guidance	7/1235	26/18670	0.0011749	0.0335975	0.0284888	10500/8829/56920/57556/10371/10512/57715	7
GO:0060706	cell differentiation involved in embryonic placenta development	7/1235	26/18670	0.0011749	0.0335975	0.0284888	8521/639/7855/144455/8320/10653/4188	7
GO:0001763	morphogenesis of a branching structure	25/1235	196/18670	0.00121719	0.0346318	0.0293658	3911/8521/1435/8829/7421/53335/5311/10371/10512/2736/639/59277/6692/7855/8626/2099/56998/2255/157506/5076/374/10653/3549/4488/183	25
GO:0018212	peptidyl-tyrosine modification	40/1235	366/18670	0.00124025	0.0351115	0.0297725	2065/4254/51704/8444/22853/2046/134/8829/9370/133396/1436/1741/3595/3383/5979/3263/57091/64092/55294/9833/5607/5608/7525/5168/7465/10420/50507/2255/374/5777/7039/285489/7294/3815/9094/183/11314/653361/7070/1195	40
GO:0014706	striated muscle tissue development	42/1235	390/18670	0.00126754	0.0357055	0.0302762	1063/2065/4703/56999/3475/7248/7049/1301/7042/7093/9318/8531/6664/4211/8470/9750/9734/10512/55553/129446/2735/2817/26471/5292/5081/64091/7161/50507/8320/6548/161882/3720/23493/3142/2702/905/6899/183/221476/55897/4878/58	42
GO:0050954	sensory perception of mechanical stimulus	22/1235	165/18670	0.00130966	0.0364772	0.0309305	4640/5172/776/1301/7054/7007/4647/246213/84059/9750/1277/3383/7275/784/332/7020/6507/25861/9132/6899/3815/5459	22
GO:0034968	histone lysine methylation	17/1235	114/18670	0.00132083	0.0364772	0.0309305	6018/90780/23411/93166/58508/51742/6830/4302/9757/1789/26053/4602/23476/23512/63976/3720/387893	17
GO:0046717	acid secretion	18/1235	124/18670	0.00132638	0.0364772	0.0309305	5244/134/1815/552/389015/9026/29887/5733/6506/5021/2912/200931/6507/5608/5027/8399/8600/50487	18
GO:0007584	response to nutrient	27/1235	219/18670	0.00132714	0.0364772	0.0309305	4982/9971/83990/462/7421/1788/64241/53335/4193/1789/9370/19/445/64127/1277/5024/6532/5292/1536/1592/4524/7352/1268/5027/594/5313/24145	27
GO:0043583	ear development	27/1235	219/18670	0.00132714	0.0364772	0.0309305	57822/1301/7042/4647/2535/10194/246213/84059/9750/2736/9423/7043/2487/7020/25861/2255/55283/9132/2103/23493/157506/5076/8013/220/6899/4760/5459	27
GO:0043270	positive regulation of ion transport	32/1235	275/18670	0.00133973	0.0366452	0.031073	9914/6717/776/5244/134/1815/552/4302/6331/5311/8811/5243/783/5024/55800/784/6532/5608/6865/6548/5027/8399/481/6330/30845/8600/183/348/2852/7070/5174/4878	32
GO:0007094	mitotic spindle assembly checkpoint	8/1235	34/18670	0.00138343	0.0367747	0.0311828	991/1063/701/5347/10403/84861/9319/9212	8
GO:0019228	neuronal action potential	8/1235	34/18670	0.00138343	0.0367747	0.0311828	8913/6331/3751/27345/5024/6329/2852/2859	8
GO:0031577	spindle checkpoint	8/1235	34/18670	0.00138343	0.0367747	0.0311828	991/1063/701/5347/10403/84861/9319/9212	8
GO:0048048	embryonic eye morphogenesis	8/1235	34/18670	0.00138343	0.0367747	0.0311828	7054/6664/7855/7020/28996/5076/220/3549	8
GO:0071173	spindle assembly checkpoint	8/1235	34/18670	0.00138343	0.0367747	0.0311828	991/1063/701/5347/10403/84861/9319/9212	8
GO:0071174	mitotic spindle checkpoint	8/1235	34/18670	0.00138343	0.0367747	0.0311828	991/1063/701/5347/10403/84861/9319/9212	8
GO:0060976	coronary vasculature development	10/1235	50/18670	0.00139586	0.0369316	0.0313159	7049/8829/161742/4052/639/4091/23493/6899/2852/55897	10
GO:0007612	learning	20/1235	145/18670	0.00140428	0.0369816	0.0313582	6900/4130/23259/2903/9162/7054/8061/2055/57338/9378/23542/7097/6865/6543/25769/8086/3815/183/10882/4900	20
GO:0030099	myeloid cell differentiation	44/1235	416/18670	0.00141175	0.0370061	0.0313791	4352/23411/4254/58508/8444/7049/1435/116071/7704/3674/9757/634/4211/9370/7098/133396/1436/29887/1387/26523/55553/1943/55294/28962/28996/7097/8357/56998/146433/375387/3930/142/5588/161882/23210/8013/5777/3815/8600/27102/653604/8361/8365/8362	44
GO:1903825	organic acid transmembrane transport	19/1235	135/18670	0.00143711	0.0373253	0.0316498	83733/11136/253512/64849/246213/32/117247/2055/6506/146167/6507/6533/9962/6539/6520/23539/54716/1468/183	19
GO:1905039	carboxylic acid transmembrane transport	19/1235	135/18670	0.00143711	0.0373253	0.0316498	83733/11136/253512/64849/246213/32/117247/2055/6506/146167/6507/6533/9962/6539/6520/23539/54716/1468/183	19
GO:0046660	female sex differentiation	17/1235	115/18670	0.00145656	0.0376577	0.0319316	23411/4254/4438/9757/5798/6092/3383/56956/26471/8204/8626/2661/2099/2516/2255/3815/269	17
GO:0003148	outflow tract septum morphogenesis	7/1235	27/18670	0.00149657	0.0385164	0.0326597	7042/8829/6092/10512/4091/6899/4488	7
GO:1901386	negative regulation of voltage-gated calcium channel activity	5/1235	14/18670	0.00151891	0.0386507	0.0327736	1815/784/10681/6236/2859	5
GO:2000345	regulation of hepatocyte proliferation	5/1235	14/18670	0.00151891	0.0386507	0.0327736	634/55679/2735/55294/7128	5
GO:2001251	negative regulation of chromosome organization	20/1235	146/18670	0.00152843	0.0386507	0.0327736	991/1063/23411/701/5347/29028/6830/4302/54454/1789/9232/7153/142/10403/3720/9700/84861/9319/9212/26271	20
GO:0006835	dicarboxylic acid transport	15/1235	96/18670	0.00154275	0.0386507	0.0327736	83733/5172/134/552/253512/64849/246213/2055/6506/65012/2912/6507/5027/1468/2352	15
GO:0008585	female gonad development	15/1235	96/18670	0.00154275	0.0386507	0.0327736	23411/4254/4438/9757/5798/6092/3383/56956/26471/8204/2661/2099/2516/3815/269	15
GO:0030219	megakaryocyte differentiation	15/1235	96/18670	0.00154275	0.0386507	0.0327736	58508/3674/9757/4211/26523/8357/5588/161882/8013/5777/3815/653604/8361/8365/8362	15
GO:0007292	female gamete generation	19/1235	136/18670	0.00156934	0.0391436	0.0331916	23397/23411/5347/4438/8061/9665/9757/54852/8204/2661/7153/79670/3549/9319/6790/284071/1618/10017/26271	19
GO:0001666	response to hypoxia	39/1235	359/18670	0.0015821	0.0392888	0.0333146	83990/4352/23411/5708/3778/7049/134/7042/7054/1788/4193/1789/9370/132864/3751/1387/3383/5024/7043/4313/6532/10891/5978/28996/1536/4602/4524/7352/7097/285/51129/50507/6548/6513/481/947/10266/5313/4878	39
GO:0070838	divalent metal ion transport	49/1235	479/18670	0.00159582	0.0394564	0.0334568	9914/5142/8913/6717/2903/342372/776/283229/1815/117144/2904/7421/9254/5311/1193/140803/57338/3383/783/29850/5024/784/10681/6236/7226/55013/6543/55283/6548/159371/5027/25769/481/6520/5777/9454/30845/152519/10266/183/24145/79568/59285/2852/7780/7070/1490/4878/2859	49
GO:0010769	regulation of cell morphogenesis involved in differentiation	34/1235	301/18670	0.00160538	0.0395202	0.0335109	6900/10154/4352/23316/10500/6498/10090/3475/4747/8829/1949/56920/6092/57556/51265/10371/10439/10512/9423/5979/55679/57091/26039/8851/57688/55604/23072/11178/23011/57715/348/65078/7070/4825	34
GO:0030071	regulation of mitotic metaphase/anaphase transition	10/1235	51/18670	0.00163512	0.0400781	0.033984	991/1063/701/5347/10403/9700/84861/9319/9212/26271	10
GO:0070997	neuron death	38/1235	348/18670	0.00164472	0.0401396	0.0340361	23411/8301/2065/7248/4747/1435/9928/134/7042/8829/2904/10936/116986/5423/7043/26471/8851/8626/10891/5978/55294/7020/28996/23321/4602/1191/6548/142/5913/54463/8013/131450/947/5966/666/348/2020/5459	38
GO:0051293	establishment of spindle localization	9/1235	43/18670	0.00171453	0.0416639	0.0353286	5347/4926/3993/29899/54820/2255/10403/9700/51203	9
GO:0051784	negative regulation of nuclear division	11/1235	60/18670	0.00172996	0.0418592	0.0354942	991/1063/701/5347/9232/286151/10403/84861/9319/9212/26271	11
GO:0098656	anion transmembrane transport	33/1235	291/18670	0.00174792	0.0419353	0.0355588	83733/11136/5172/9635/55107/253512/389015/64849/246213/32/117247/2055/19/1193/6558/5243/6506/65012/6553/146167/6507/2557/6533/9962/6548/6539/2570/25769/6520/23539/54716/1468/183	33
GO:0042698	ovulation cycle	12/1235	69/18670	0.00174792	0.0419353	0.0355588	23411/4808/7042/5798/6092/7043/5021/8204/2661/2099/2516/5608	12
GO:0061097	regulation of protein tyrosine kinase activity	14/1235	88/18670	0.0018323	0.0437741	0.037118	2065/51704/134/1436/1741/57091/55294/50507/7039/285489/9094/183/653361/7070	14
GO:1902668	negative regulation of axon guidance	7/1235	28/18670	0.00188291	0.0444231	0.0376682	10500/8829/56920/57556/10371/10512/57715	7
GO:0001956	positive regulation of neurotransmitter secretion	6/1235	21/18670	0.00189534	0.0444231	0.0376682	23025/776/783/6865/1268/2852	6
GO:0030038	contractile actin filament bundle assembly	15/1235	98/18670	0.00190471	0.0444231	0.0376682	3925/22843/22998/7248/8829/85462/55616/7043/79822/55604/395/50507/6548/10174/1490	15
GO:0043149	stress fiber assembly	15/1235	98/18670	0.00190471	0.0444231	0.0376682	3925/22843/22998/7248/8829/85462/55616/7043/79822/55604/395/50507/6548/10174/1490	15
GO:0045839	negative regulation of mitotic nuclear division	10/1235	52/18670	0.00190654	0.0444231	0.0376682	991/1063/701/5347/9232/10403/84861/9319/9212/26271	10
GO:0050885	neuromuscular process controlling balance	10/1235	52/18670	0.00190654	0.0444231	0.0376682	4747/4647/2055/57338/9378/6507/8013/220/2307/5459	10
GO:0007548	sex differentiation	31/1235	270/18670	0.00195205	0.0452571	0.0383755	83990/23411/4254/51742/4438/7042/8531/9757/5798/23598/6092/7098/10371/51665/9667/3383/6716/91181/56956/26471/8204/8626/2661/2099/2516/2255/157506/666/3815/8743/269	31
GO:0014074	response to purine-containing compound	20/1235	149/18670	0.00195832	0.0452571	0.0383755	8061/2819/5798/1789/9370/5311/445/1277/5024/53905/5187/6532/7226/10891/50507/5027/374/610/5313/24145	20
GO:0022604	regulation of cell morphogenesis	49/1235	484/18670	0.00197803	0.0453597	0.0384625	6900/10154/4352/6708/23316/10500/6498/10090/3475/23025/4747/8829/1949/53335/56920/6092/57556/51265/1436/10371/9699/10439/10512/9423/3383/5979/55679/57091/26039/8851/57688/55604/23072/11178/5168/157922/752/54873/118987/54764/161176/23011/57715/5064/3815/348/65078/7070/4825	49
GO:0050731	positive regulation of peptidyl-tyrosine phosphorylation	24/1235	192/18670	0.00198552	0.0453597	0.0384625	2065/4254/51704/134/8829/9370/133396/1436/1741/3383/3263/57091/55294/7525/5168/50507/2255/374/7039/285489/3815/9094/183/653361	24
GO:0016266	O-glycan processing	11/1235	61/18670	0.00198679	0.0453597	0.0384625	94025/84002/4588/727897/200958/51301/26290/117248/50614/10331/374907	11
GO:0007586	digestion	19/1235	139/18670	0.00202953	0.0461494	0.0391321	57482/4588/7421/64241/389015/9026/29887/5733/64127/29881/5021/6476/10891/55765/2255/6518/4760/2693/5225	19
GO:0032733	positive regulation of interleukin-10 production	8/1235	36/18670	0.00204972	0.0462372	0.0392065	7292/29126/64127/55765/7097/53833/947/9308	8
GO:1901020	negative regulation of calcium ion transmembrane transporter activity	8/1235	36/18670	0.00204972	0.0462372	0.0392065	6717/1815/5311/1193/784/10681/6236/2859	8
GO:0061138	morphogenesis of a branching epithelium	23/1235	182/18670	0.00211245	0.0472729	0.0400847	3911/8521/1435/8829/7421/5311/10371/10512/2736/59277/6692/7855/8626/2099/56998/2255/157506/5076/374/10653/3549/4488/183	23
GO:0016331	morphogenesis of embryonic epithelium	20/1235	150/18670	0.00212262	0.0472729	0.0400847	57822/3911/7248/7042/2535/6664/55764/2736/5979/6692/8626/7020/4524/2255/157506/5076/220/10653/8463/8543	20
GO:0061982	meiosis I cell cycle process	17/1235	119/18670	0.00212318	0.0472729	0.0400847	83990/5347/4438/9232/4361/993/54456/995/29893/5888/7153/9700/9319/6790/284071/29947/26271	17
GO:1901654	response to ketone	24/1235	193/18670	0.00212903	0.0472729	0.0400847	23411/7292/5244/4747/7049/7042/7054/8061/117144/552/7023/1789/114/445/3383/114907/7043/5021/1536/7097/142/9076/10266/2693	24
GO:0072511	divalent inorganic cation transport	49/1235	486/18670	0.00215198	0.0474806	0.0402608	9914/5142/8913/6717/2903/342372/776/283229/1815/117144/2904/7421/9254/5311/1193/140803/57338/3383/783/29850/5024/784/10681/6236/7226/55013/6543/55283/6548/159371/5027/25769/481/6520/5777/9454/30845/152519/10266/183/24145/79568/59285/2852/7780/7070/1490/4878/2859	49
GO:0034616	response to laminar fluid shear stress	5/1235	15/18670	0.00215516	0.0474806	0.0402608	19/445/7043/5607/4091	5
GO:0071560	cellular response to transforming growth factor beta stimulus	29/1235	249/18670	0.0021665	0.0475454	0.0403158	9480/23411/57530/6498/54778/7049/7042/6664/4052/1387/1277/55553/7043/10891/2661/28996/7525/63976/80326/50507/9958/375387/142/4091/9076/2331/23592/8425/269	29
GO:0060048	cardiac muscle contraction	19/1235	140/18670	0.00220621	0.0481959	0.0408674	5142/8913/6717/776/134/6331/1193/783/55800/5608/3781/6548/3728/2702/481/6330/30845/1490/4878	19
GO:1902099	regulation of metaphase/anaphase transition of cell cycle	10/1235	53/18670	0.00221316	0.0481959	0.0408674	991/1063/701/5347/10403/9700/84861/9319/9212/26271	10
GO:0003231	cardiac ventricle development	18/1235	130/18670	0.00227549	0.0490287	0.0415736	7049/1301/7042/2535/6664/4052/4193/6331/6092/10512/639/129446/4091/161882/23493/2702/8543/55897	18
GO:0006997	nucleus organization	18/1235	130/18670	0.00227549	0.0490287	0.0415736	23345/90780/4928/5347/57602/8444/9221/4926/81929/2334/9133/26993/28996/6683/54700/23592/23141/2852	18
GO:0045132	meiotic chromosome segregation	14/1235	90/18670	0.00227739	0.0490287	0.0415736	150280/83990/23397/701/5347/4438/151246/9232/4361/7153/83540/9700/9319/284071	14
GO:0055088	lipid homeostasis	20/1235	151/18670	0.00229842	0.0492941	0.0417986	9971/23411/116285/9969/5244/134/57476/338/64241/9734/19/6296/83667/55294/51129/285848/8399/10938/348/27346	20
GO:0061448	connective tissue development	31/1235	273/18670	0.00231931	0.0495544	0.0420193	9971/353500/23411/1301/1435/4322/7704/389084/1293/1292/25886/64764/2736/1277/55553/2487/10891/5081/38/8538/176/8817/947/51320/3549/4488/51435/6097/1490/1291/5744	31
GO:0034331	cell junction maintenance	7/1235	29/18670	0.00234221	0.0496606	0.0421093	144100/1436/1741/25861/4983/55765/10882	7
GO:0061387	regulation of extent of cell growth	16/1235	110/18670	0.00234734	0.0496606	0.0421093	10500/3475/8829/56920/57556/51265/10371/10439/10512/9423/8851/23011/57715/348/65078/4825	16
GO:0046879	hormone secretion	34/1235	308/18670	0.00235059	0.0496606	0.0421093	91608/9971/353500/6717/776/134/55107/6664/5798/9254/9370/9699/114/387597/338442/5978/2661/4602/3382/6865/1407/1268/5991/6513/8425/8600/183/2852/4760/388581/4878/2693/4825/389692	34
GO:0007018	microtubule-based movement	32/1235	285/18670	0.0023812	0.0501202	0.0424991	123872/56171/55811/4130/55567/201625/24137/4747/9928/117144/23224/1770/3798/26074/55764/166379/6103/547/144132/56992/7275/54768/199223/54820/6683/5991/11004/23011/9493/374654/3797/126731	32
GO:0006865	amino acid transport	19/1235	141/18670	0.00239566	0.0502378	0.0425988	83733/11136/134/118980/552/246213/117247/2055/6506/146167/2912/6507/6533/6539/6540/5027/6520/54716/183	19
GO:0001558	regulation of cell growth	43/1235	416/18670	0.00246006	0.0513663	0.0435557	23411/10500/3475/23025/2786/9928/7042/8829/552/8877/634/53335/23677/56920/57556/51265/10371/9699/6595/10439/64061/10512/9423/83667/6832/8851/2487/131566/2661/5607/6548/5588/23011/57715/8425/84861/183/348/65078/221476/27346/4878/4825	43
GO:0030198	extracellular matrix organization	39/1235	368/18670	0.00246762	0.0513663	0.0435557	4982/64094/22801/50509/54507/3911/56999/3918/1301/8515/7042/7093/4322/2/3674/1463/1293/11096/1292/1277/3383/90993/7450/59277/6692/4313/9509/176/79148/2331/10653/3549/2683/10266/183/4320/7276/1490/1291	39
GO:0000187	activation of MAPK activity	20/1235	152/18670	0.00248632	0.0515283	0.043693	2081/60370/1815/9043/64127/128239/5979/7043/200958/23118/5607/55765/5608/7161/2255/8550/5027/7039/3815/8600	20
GO:0006813	potassium ion transport	28/1235	240/18670	0.0024936	0.0515283	0.043693	3786/3770/7248/776/3778/3782/134/3742/389015/5311/3751/8811/27345/6558/29850/6553/1804/6507/3781/9132/6548/3772/25769/2702/481/610/3761/4878	28
GO:0051899	membrane depolarization	14/1235	91/18670	0.00253133	0.0521177	0.0441929	8913/776/6331/783/55800/784/7871/142/5027/2702/6330/610/666/6329	14
GO:0070252	actin-mediated cell contraction	17/1235	121/18670	0.00254224	0.0521527	0.0442225	5142/8913/4703/6717/776/134/6331/783/55800/7111/4621/3781/6548/3728/2702/6330/58	17
GO:0043392	negative regulation of DNA binding	10/1235	54/18670	0.00255821	0.0522909	0.0443397	6717/51773/7023/6664/55294/56998/23493/4488/4188/4751	10
GO:0046545	development of primary female sexual characteristics	15/1235	101/18670	0.00257821	0.0524294	0.0444572	23411/4254/4438/9757/5798/6092/3383/56956/26471/8204/2661/2099/2516/3815/269	15
GO:0043062	extracellular structure organization	39/1235	369/18670	0.00258842	0.0524294	0.0444572	4982/64094/22801/50509/54507/3911/56999/3918/1301/8515/7042/7093/4322/2/3674/1463/1293/11096/1292/1277/3383/90993/7450/59277/6692/4313/9509/176/79148/2331/10653/3549/2683/10266/183/4320/7276/1490/1291	39
GO:0007062	sister chromatid cohesion	11/1235	63/18670	0.00259344	0.0524294	0.0444572	150280/991/701/5347/23126/10274/151246/4361/55294/9700/79075	11
GO:0045216	cell-cell junction organization	23/1235	185/18670	0.00261129	0.0524294	0.0444572	9971/7042/144100/5817/253559/1436/84552/1010/55679/129446/7043/54549/7855/1008/25861/55765/3728/7368/9076/2702/81607/10266/183	23
GO:1902275	regulation of chromatin organization	23/1235	185/18670	0.00261129	0.0524294	0.0444572	90780/23411/29028/5587/9733/6830/4302/9757/54454/1789/8318/26053/56254/26993/10891/4602/4524/5081/23476/144108/7290/79829/3720	23
GO:0009743	response to carbohydrate	27/1235	230/18670	0.00270039	0.0538762	0.0456839	9971/2081/6717/7054/55107/338/5798/1292/9370/114/387597/3383/83667/5024/10891/5608/285/50507/5076/6518/5313/2852/4760/1490/388581/4825/389692	27
GO:0003333	amino acid transmembrane transport	13/1235	82/18670	0.00271189	0.0538762	0.0456839	83733/11136/246213/117247/2055/6506/146167/6507/6533/6539/6520/54716/183	13
GO:1905954	positive regulation of lipid localization	13/1235	82/18670	0.00271189	0.0538762	0.0456839	23411/5244/338/32/9370/19/4602/5608/5027/8399/10938/8600/348	13
GO:0070507	regulation of microtubule cytoskeleton organization	23/1235	186/18670	0.00279828	0.0541336	0.0459022	1540/3925/64793/4130/5347/10274/4926/10615/220134/25886/29899/56890/26586/8851/6683/79866/157922/221150/85459/4751/6790/126731/10460	23
GO:0014075	response to amine	9/1235	46/18670	0.00280284	0.0541336	0.0459022	6571/2903/7054/1815/9734/445/3383/5021/50484	9
GO:0060443	mammary gland morphogenesis	9/1235	46/18670	0.00280284	0.0541336	0.0459022	1435/7421/1436/2736/9423/2099/2255/374/4488	9
GO:0045833	negative regulation of lipid metabolic process	14/1235	92/18670	0.00280812	0.0541336	0.0459022	9971/23411/134/8877/634/32/338442/376497/5978/55294/1268/113791/348/2852	14
GO:0030048	actin filament-based movement	19/1235	143/18670	0.00281569	0.0541336	0.0459022	5142/8913/4703/6717/776/134/4647/23224/6331/783/55800/7111/4621/3781/6548/3728/2702/6330/58	19
GO:0048638	regulation of developmental growth	37/1235	347/18670	0.00282917	0.0541336	0.0459022	10500/3475/23025/7049/1435/8829/7093/8531/53335/4211/32/9254/56920/57556/51265/10371/9699/10439/10512/9423/2735/6532/8851/5292/7161/3720/23493/3142/23011/57715/348/65078/221476/2307/2693/4825/153	37
GO:0045814	negative regulation of gene expression, epigenetic	15/1235	102/18670	0.00284228	0.0541336	0.0459022	23411/29028/54454/1788/1789/8318/4524/8357/23512/7290/3720/653604/8361/8365/8362	15
GO:0019098	reproductive behavior	7/1235	30/18670	0.00288319	0.0541336	0.0459022	4808/7054/552/1620/5021/23542/153222	7
GO:1902751	positive regulation of cell cycle G2/M phase transition	7/1235	30/18670	0.00288319	0.0541336	0.0459022	8444/993/995/79915/23476/51514/26271	7
GO:0007135	meiosis II	4/1235	10/18670	0.00289694	0.0541336	0.0459022	150280/701/151246/1618	4
GO:0021936	regulation of cerebellar granule cell precursor proliferation	4/1235	10/18670	0.00289694	0.0541336	0.0459022	64211/2736/2735/6532	4
GO:0032308	positive regulation of prostaglandin secretion	4/1235	10/18670	0.00289694	0.0541336	0.0459022	5608/5027/8399/8600	4
GO:0032875	regulation of DNA endoreduplication	4/1235	10/18670	0.00289694	0.0541336	0.0459022	4361/55294/144455/26271	4
GO:0045741	positive regulation of epidermal growth factor-activated receptor activity	4/1235	10/18670	0.00289694	0.0541336	0.0459022	134/55294/7039/653361	4
GO:0051231	spindle elongation	4/1235	10/18670	0.00289694	0.0541336	0.0459022	24137/4926/9493/9212	4
GO:0060371	regulation of atrial cardiac muscle cell membrane depolarization	4/1235	10/18670	0.00289694	0.0541336	0.0459022	8913/6331/55800/2702	4
GO:0060600	dichotomous subdivision of an epithelial terminal unit	4/1235	10/18670	0.00289694	0.0541336	0.0459022	8829/10371/10512/374	4
GO:0061983	meiosis II cell cycle process	4/1235	10/18670	0.00289694	0.0541336	0.0459022	150280/701/151246/1618	4
GO:0009581	detection of external stimulus	18/1235	133/18670	0.00293154	0.0543398	0.0460771	1040/1258/342372/1301/134/55107/58473/5311/84059/10692/784/10002/25861/3728/3815/9094/2979/56925	18
GO:0042770	signal transduction in response to DNA damage	18/1235	133/18670	0.00293154	0.0543398	0.0460771	23411/5347/8444/161742/7023/4193/83667/65975/11200/995/28996/144455/79915/51514/51512/84142/6790/387893	18
GO:0086091	regulation of heart rate by cardiac conduction	8/1235	38/18670	0.00294546	0.0543398	0.0460771	8913/776/6331/783/55800/3728/2702/6330	8
GO:0010934	macrophage cytokine production	5/1235	16/18670	0.00296556	0.0543398	0.0460771	23411/51704/11213/7042/7043	5
GO:0032354	response to follicle-stimulating hormone	5/1235	16/18670	0.00296556	0.0543398	0.0460771	5069/2046/7049/10891/2693	5
GO:0071871	response to epinephrine	5/1235	16/18670	0.00296556	0.0543398	0.0460771	5142/9370/10891/6548/5313	5
GO:0002062	chondrocyte differentiation	17/1235	123/18670	0.00302804	0.0553056	0.046896	1301/7704/1293/1292/25886/64764/2736/55553/176/8817/51320/3549/4488/51435/1490/1291/5744	17
GO:1901214	regulation of neuron death	34/1235	313/18670	0.00305018	0.0553312	0.0469177	23411/8301/2065/7248/4747/1435/9928/134/7042/8829/2904/10936/116986/7043/26471/8851/10891/5978/55294/7020/28996/23321/4602/1191/142/5913/54463/8013/131450/947/5966/666/348/2020	34
GO:0030522	intracellular receptor signaling pathway	31/1235	278/18670	0.00306332	0.0553312	0.0469177	9971/1540/23411/7421/64127/80216/9667/10002/5187/8204/131566/8626/10891/167465/5292/23118/2099/2516/55765/5608/1592/1407/142/2103/8013/6899/6097/340061/2852/59344/7128	31
GO:0071559	response to transforming growth factor beta	29/1235	255/18670	0.00307994	0.0553312	0.0469177	9480/23411/57530/6498/54778/7049/7042/6664/4052/1387/1277/55553/7043/10891/2661/28996/7525/63976/80326/50507/9958/375387/142/4091/9076/2331/23592/8425/269	29
GO:0035249	synaptic transmission, glutamatergic	14/1235	93/18670	0.00310928	0.0553312	0.0469177	23025/9162/134/440279/246213/9378/2894/5021/2912/23542/4983/2918/1268/57616	14
GO:0001701	in utero embryonic development	39/1235	373/18670	0.00312404	0.0553312	0.0469177	90780/57677/6498/8521/8061/9318/3294/6830/8531/338/5311/22846/5423/2736/639/55553/7043/6692/9133/5930/7855/705/144455/10568/54700/84660/8320/2016/9394/201895/23493/157506/1045/10653/26469/3549/4188/4751/4242	39
GO:0010977	negative regulation of neuron projection development	20/1235	155/18670	0.00312923	0.0553312	0.0469177	10500/3475/7248/8829/1949/53335/4193/56920/57556/51265/10371/10512/9423/8851/57715/56963/348/65078/7070/93650	20
GO:0007413	axonal fasciculation	6/1235	23/18670	0.00314671	0.0553312	0.0469177	6900/8829/1951/10371/8851/1268	6
GO:0015740	C4-dicarboxylate transport	6/1235	23/18670	0.00314671	0.0553312	0.0469177	83733/253512/64849/6506/6507/1468	6
GO:0032703	negative regulation of interleukin-2 production	6/1235	23/18670	0.00314671	0.0553312	0.0469177	9971/53833/947/30009/9454/7128	6
GO:0060445	branching involved in salivary gland morphogenesis	6/1235	23/18670	0.00314671	0.0553312	0.0469177	3911/8829/10371/10512/59277/2255	6
GO:0061436	establishment of skin barrier	6/1235	23/18670	0.00314671	0.0553312	0.0469177	57822/3925/84283/8626/9076/59344	6
GO:0106030	neuron projection fasciculation	6/1235	23/18670	0.00314671	0.0553312	0.0469177	6900/8829/1951/10371/8851/1268	6
GO:0042391	regulation of membrane potential	44/1235	434/18670	0.00317722	0.0554416	0.0470113	3786/23316/8913/6717/2903/776/9162/3778/134/1815/2904/4355/6331/3751/9699/27345/9378/783/2894/5024/55800/784/23542/7871/2557/3781/64091/1268/6548/142/5027/3728/2570/2702/481/6330/610/30845/666/6329/2852/4878/2859/153	44
GO:0048565	digestive tract development	18/1235	134/18670	0.00318246	0.0554416	0.0470113	123872/7042/6664/445/2736/639/5979/2735/51339/7043/5021/8626/2255/3142/60529/1045/3549/3815	18
GO:0031032	actomyosin structure organization	24/1235	199/18670	0.00318876	0.0554416	0.0470113	3925/22843/4703/22998/7248/8476/8829/85462/54566/2036/55616/7043/79822/55604/7111/4621/395/50507/6548/54443/9493/10174/1490/58	24
GO:0055074	calcium ion homeostasis	47/1235	471/18670	0.00320036	0.0554416	0.0470113	9914/1258/6717/2903/776/79608/134/1815/2904/7421/552/1240/9170/5311/29887/114/1193/5733/57338/54757/8811/783/5024/784/7226/5021/55013/2099/80045/6543/1268/55283/159371/118987/5027/25769/481/5777/666/8600/3061/183/79568/348/2852/7070/2859	47
GO:0006941	striated muscle contraction	22/1235	177/18670	0.00320458	0.0554416	0.0470113	5142/8913/6717/776/134/6331/1193/783/55800/23336/4621/5608/3781/6548/3728/2702/481/6330/30845/6329/1490/4878	22
GO:0086001	cardiac muscle cell action potential	12/1235	74/18670	0.00321173	0.0554416	0.0470113	8913/776/6331/783/55800/7871/3781/3728/2702/481/6330/610	12
GO:0070192	chromosome organization involved in meiotic cell cycle	11/1235	65/18670	0.00334146	0.0575056	0.0487615	150280/83990/23397/701/4438/9918/151246/4361/5888/9319/284071	11
GO:0060349	bone morphogenesis	16/1235	114/18670	0.00338699	0.0581126	0.0492761	158326/4322/4665/1293/1292/25886/1112/1277/7043/7020/8817/3549/4488/51435/338773/1291	16
GO:0043434	response to peptide hormone	44/1235	436/18670	0.00345885	0.0591661	0.0501695	9971/83990/23411/7248/4747/7049/7054/634/5798/4193/9370/132864/9734/114/445/1277/3383/83667/376497/5021/2516/1536/7352/7097/1407/6548/142/5588/2549/374/8013/6513/493829/5166/5313/183/8743/2852/1490/388581/4878/2693/4825/4303	44
GO:0031062	positive regulation of histone methylation	8/1235	39/18670	0.00349456	0.0595969	0.0505348	23411/1789/26053/56254/4602/5081/23476/3720	8
GO:0045742	positive regulation of epidermal growth factor receptor signaling pathway	7/1235	31/18670	0.00351486	0.0597632	0.0506758	134/9026/55294/7039/183/2852/653361	7
GO:0051961	negative regulation of nervous system development	34/1235	316/18670	0.00355004	0.0601691	0.0510199	6900/10500/3475/7248/340533/8829/1949/4854/6664/53335/4211/4193/56920/6092/55764/57556/51265/10371/1620/10512/9423/6532/8851/5978/7097/7161/57715/56963/26022/348/65078/7070/93650/4825	34
GO:0055123	digestive system development	19/1235	146/18670	0.00355999	0.0601691	0.0510199	123872/7042/6664/9026/445/2736/639/5979/2735/51339/7043/5021/8626/2255/3142/60529/1045/3549/3815	19
GO:0043406	positive regulation of MAP kinase activity	29/1235	258/18670	0.00364789	0.0614712	0.0521241	2081/4254/142679/134/60370/1815/9043/64127/128239/5979/7043/152110/7855/200958/23118/5607/55765/5608/7161/50507/2255/7164/8550/5027/8817/9020/7039/3815/8600	29
GO:0051656	establishment of organelle localization	41/1235	401/18670	0.0037097	0.0623273	0.05285	9696/1063/8301/5347/89866/4747/9928/4926/4647/23224/10615/3993/81929/3798/547/9423/29899/54820/6683/4033/2255/11004/83540/161176/10403/374/8013/9700/51203/9493/90411/7039/3815/7462/3797/129880/284071/11314/79090/50487/4878	41
GO:0009582	detection of abiotic stimulus	18/1235	136/18670	0.00373801	0.0626172	0.0530958	1040/1258/342372/1301/134/55107/58473/5311/84059/10692/784/10002/25861/3728/3815/9094/2979/56925	18
GO:0008038	neuron recognition	9/1235	48/18670	0.0037897	0.0627621	0.0532187	6900/8829/1949/1951/6092/10371/57453/8851/1268	9
GO:0035272	exocrine system development	9/1235	48/18670	0.0037897	0.0627621	0.0532187	3911/7042/8829/10371/5423/10512/59277/7043/2255	9
GO:0051653	spindle localization	9/1235	48/18670	0.0037897	0.0627621	0.0532187	5347/4926/3993/29899/54820/2255/10403/9700/51203	9
GO:0110020	regulation of actomyosin structure organization	14/1235	95/18670	0.003791	0.0627621	0.0532187	3925/22843/22998/7248/8829/55616/7043/79822/55604/395/50507/6548/10174/1490	14
GO:0090257	regulation of muscle system process	29/1235	259/18670	0.00385589	0.0636476	0.0539696	5142/6717/3778/134/8877/6331/1193/114907/143872/5021/29995/10891/6865/6548/142/3728/3720/8013/2702/481/30845/3815/183/6329/2852/221476/1490/4878/2693	29
GO:0009746	response to hexose	24/1235	202/18670	0.00386697	0.0636476	0.0539696	9971/2081/6717/7054/55107/5798/1292/9370/114/387597/3383/83667/10891/285/50507/5076/6518/5313/2852/4760/1490/388581/4825/389692	24
GO:0031589	cell-substrate adhesion	37/1235	354/18670	0.00394847	0.0637552	0.0540608	9480/64094/22801/50509/3911/56999/22998/3918/158326/7248/340533/1435/8515/9928/8829/7007/3674/2196/1277/55679/7450/59277/57091/55604/285613/285/395/10420/6548/4091/123720/3728/8394/947/10174/7070/1490	37
GO:0045665	negative regulation of neuron differentiation	26/1235	225/18670	0.00396047	0.0637552	0.0540608	6900/10500/3475/7248/8829/1949/4854/53335/4211/4193/56920/57556/51265/10371/10512/9423/6532/8851/5978/7161/57715/56963/348/65078/7070/93650	26
GO:0003181	atrioventricular valve morphogenesis	6/1235	24/18670	0.0039641	0.0637552	0.0540608	7042/4193/10439/4091/161882/23493	6
GO:0034505	tooth mineralization	6/1235	24/18670	0.0039641	0.0637552	0.0540608	152816/1277/54757/7020/6899/4488	6
GO:0090103	cochlea morphogenesis	6/1235	24/18670	0.0039641	0.0637552	0.0540608	57822/2535/2736/2487/5076/6899	6
GO:0003184	pulmonary valve morphogenesis	5/1235	17/18670	0.00397485	0.0637552	0.0540608	7042/6092/4091/23493/2702	5
GO:0007076	mitotic chromosome condensation	5/1235	17/18670	0.00397485	0.0637552	0.0540608	23397/9918/26993/64151/51203	5
GO:0031649	heat generation	5/1235	17/18670	0.00397485	0.0637552	0.0540608	5733/376497/1268/8600/153	5
GO:0048532	anatomical structure arrangement	5/1235	17/18670	0.00397485	0.0637552	0.0540608	9928/8829/10371/7020/5076	5
GO:1903532	positive regulation of secretion by cell	41/1235	403/18670	0.00404704	0.0646459	0.054816	91608/9971/8913/91662/7292/6717/93664/23025/776/7042/55107/23086/552/6664/1436/114/29126/64127/783/338442/7043/6532/5021/7855/8618/4602/5608/11126/7097/6865/1268/5027/8399/947/8600/183/24145/2852/388581/4878/4825	41
GO:0048511	rhythmic process	32/1235	295/18670	0.00405321	0.0646459	0.054816	23411/54551/4808/134/7042/7054/1815/5798/6092/9370/3751/445/1387/8863/7043/5187/6532/8851/5021/8204/10891/55294/2661/2099/2516/5608/80045/7153/1407/51514/9956/6097	32
GO:0032412	regulation of ion transmembrane transporter activity	29/1235	260/18670	0.00407383	0.0647923	0.0549401	5142/6717/2903/776/4747/1815/2904/5311/1741/1193/57338/8811/5243/783/55800/784/10681/6236/23542/7871/10891/23072/6548/481/6330/30845/5174/4878/2859	29
GO:0072330	monocarboxylic acid biosynthetic process	27/1235	237/18670	0.00409399	0.0649305	0.0550573	9971/23411/116285/10090/114880/552/1463/634/84532/32/9370/6296/1571/6507/9524/64577/157506/220/570/79993/4048/80270/1593/5166/5313/59344/122970	27
GO:0071526	semaphorin-plexin signaling pathway	8/1235	40/18670	0.0041197	0.0650738	0.0551788	10154/10500/8829/56920/57556/10371/10512/57715	8
GO:0046394	carboxylic acid biosynthetic process	37/1235	355/18670	0.00413568	0.0650738	0.0551788	9971/23411/116285/55256/10090/114880/552/1463/634/84532/32/9370/10157/445/6296/1571/6507/4524/4258/6470/26227/9524/64577/157506/220/570/79993/4048/80270/2687/2678/1593/5166/5313/59344/29920/122970	37
GO:0051047	positive regulation of secretion	43/1235	428/18670	0.0041375	0.0650738	0.0551788	91608/9971/54843/8913/91662/7292/6717/93664/23025/776/134/7042/55107/23086/552/6664/1436/114/29126/64127/783/338442/7043/6532/5021/7855/8618/4602/5608/11126/7097/6865/1268/5027/8399/947/8600/183/24145/2852/388581/4878/4825	43
GO:0042632	cholesterol homeostasis	14/1235	96/18670	0.00417485	0.0654792	0.0555226	9971/23411/116285/9969/57476/338/64241/9734/19/6296/8399/10938/348/27346	14
GO:0021537	telencephalon development	28/1235	249/18670	0.00420744	0.0655083	0.0555473	6900/7248/4747/9928/7054/552/26050/23224/6331/64211/6092/1436/10371/6506/8851/1943/5021/57688/54820/8320/2016/8013/220/6513/65078/10460/4760/4900	28
GO:0001975	response to amphetamine	7/1235	32/18670	0.00424653	0.0655083	0.0555473	6571/2903/7054/1815/9734/3383/5021	7
GO:0048841	regulation of axon extension involved in axon guidance	7/1235	32/18670	0.00424653	0.0655083	0.0555473	10500/8829/56920/57556/10371/10512/57715	7
GO:0060674	placenta blood vessel development	7/1235	32/18670	0.00424653	0.0655083	0.0555473	8061/5311/22846/6692/7855/9394/23493	7
GO:0005984	disaccharide metabolic process	4/1235	11/18670	0.00431554	0.0655083	0.0555473	673/11181/6513/2683	4
GO:0030309	poly-N-acetyllactosamine metabolic process	4/1235	11/18670	0.00431554	0.0655083	0.0555473	84002/89792/10331/374907	4
GO:0031652	positive regulation of heat generation	4/1235	11/18670	0.00431554	0.0655083	0.0555473	5733/376497/1268/8600	4
GO:0032306	regulation of prostaglandin secretion	4/1235	11/18670	0.00431554	0.0655083	0.0555473	5608/5027/8399/8600	4
GO:0042023	DNA endoreduplication	4/1235	11/18670	0.00431554	0.0655083	0.0555473	4361/55294/144455/26271	4
GO:0042482	positive regulation of odontogenesis	4/1235	11/18670	0.00431554	0.0655083	0.0555473	1435/152816/7020/947	4
GO:0070471	uterine smooth muscle contraction	4/1235	11/18670	0.00431554	0.0655083	0.0555473	5021/6865/183/2852	4
GO:0099624	atrial cardiac muscle cell membrane repolarization	4/1235	11/18670	0.00431554	0.0655083	0.0555473	776/6331/3781/4878	4
GO:0016053	organic acid biosynthetic process	37/1235	356/18670	0.0043304	0.0655409	0.055575	9971/23411/116285/55256/10090/114880/552/1463/634/84532/32/9370/10157/445/6296/1571/6507/4524/4258/6470/26227/9524/64577/157506/220/570/79993/4048/80270/2687/2678/1593/5166/5313/59344/29920/122970	37
GO:0046631	alpha-beta T cell activation	18/1235	138/18670	0.00437144	0.0655409	0.055575	7292/4063/7704/29126/639/6304/4602/11126/8320/5588/161882/3142/26022/30009/3549/9308/6097/11314	18
GO:0016570	histone modification	45/1235	454/18670	0.00437261	0.0655409	0.055575	9971/6018/90780/23411/57602/93166/58508/51742/5587/51322/11108/9733/51773/6830/4302/9757/1789/7862/9734/1387/26053/56254/2959/5187/26993/79885/10891/5978/6304/4602/4524/5081/23476/23512/63976/9958/23429/79829/23210/3720/25862/6790/1810/387893/9212	45
GO:0043124	negative regulation of I-kappaB kinase/NF-kappaB signaling	9/1235	49/18670	0.00437557	0.0655409	0.055575	9971/23411/91662/9370/5187/2099/79931/84270/7128	9
GO:0051445	regulation of meiotic cell cycle	9/1235	49/18670	0.00437557	0.0655409	0.055575	991/993/995/286151/9319/4488/284071/1618/26271	9
GO:0030837	negative regulation of actin filament polymerization	10/1235	58/18670	0.00439146	0.0656054	0.0556297	6708/57482/6710/9026/55604/7111/286527/10677/50853/11013	10
GO:0030900	forebrain development	39/1235	381/18670	0.00448526	0.0668303	0.0566683	6900/9095/7248/4747/9928/7054/8829/552/26050/23224/4854/6331/64211/6092/1436/10371/139411/547/2736/6506/2735/8851/1943/5021/10891/57688/5308/4983/54820/2255/8320/2016/8013/220/6513/65078/10460/4760/4900	39
GO:0003205	cardiac chamber development	21/1235	171/18670	0.00451706	0.0669518	0.0567713	7049/1301/7042/8829/2535/6664/4052/4193/6331/6092/10512/639/129446/4091/161882/23493/2702/6899/4488/8543/55897	21
GO:0006937	regulation of muscle contraction	21/1235	171/18670	0.00451706	0.0669518	0.0567713	5142/6717/3778/134/8877/6331/1193/143872/5021/6865/6548/3728/2702/481/30845/3815/6329/2852/1490/4878/2693	21
GO:0046883	regulation of hormone secretion	29/1235	262/18670	0.004541	0.0671309	0.0569232	91608/9971/353500/6717/776/134/55107/6664/9254/9370/114/338442/5978/2661/4602/3382/6865/1407/1268/5991/6513/8600/183/2852/4760/388581/4878/2693/4825	29
GO:0001892	embryonic placenta development	13/1235	87/18670	0.00458683	0.0671486	0.0569382	8521/5311/22846/639/6692/7855/144455/8320/9394/23493/1045/10653/4188	13
GO:0010771	negative regulation of cell morphogenesis involved in differentiation	14/1235	97/18670	0.00458963	0.0671486	0.0569382	10500/3475/8829/1949/56920/57556/51265/10371/10512/9423/8851/57715/65078/7070	14
GO:0032231	regulation of actin filament bundle assembly	14/1235	97/18670	0.00458963	0.0671486	0.0569382	3925/22843/22998/7248/8829/55616/7043/79822/55604/395/50507/6548/10174/1490	14
GO:0055092	sterol homeostasis	14/1235	97/18670	0.00458963	0.0671486	0.0569382	9971/23411/116285/9969/57476/338/64241/9734/19/6296/8399/10938/348/27346	14
GO:0060562	epithelial tube morphogenesis	34/1235	322/18670	0.00476141	0.0694822	0.058917	123872/57822/3911/7248/1435/7042/8829/7421/2535/6664/55764/5311/1436/2736/9423/5979/6692/2099/55083/4524/56998/2255/157506/5076/374/10653/8463/3549/6899/4488/8543/183/129880/55897	34
GO:0090224	regulation of spindle organization	8/1235	41/18670	0.00482753	0.0700859	0.0594288	5347/10274/4926/10615/29899/79866/126731/10460	8
GO:0140353	lipid export from cell	8/1235	41/18670	0.00482753	0.0700859	0.0594288	2661/4602/5608/1407/5027/8399/8600/183	8
GO:0071805	potassium ion transmembrane transport	25/1235	217/18670	0.00484546	0.0701662	0.059497	3786/3770/776/3778/3782/3742/389015/5311/3751/8811/27345/6558/29850/6553/1804/6507/3781/9132/6548/3772/25769/481/610/3761/4878	25
GO:0002526	acute inflammatory response	15/1235	108/18670	0.00493495	0.0712798	0.0604412	462/7292/134/445/5733/3383/26471/84699/56998/1268/2152/53833/8600/2683/27102	15
GO:0018022	peptidyl-lysine methylation	17/1235	129/18670	0.00496688	0.0715584	0.0606774	6018/90780/23411/93166/58508/51742/6830/4302/9757/1789/26053/4602/23476/23512/63976/3720/387893	17
GO:0009409	response to cold	9/1235	50/18670	0.00502965	0.0720959	0.0611332	8531/5024/376497/10891/2766/7352/6548/84918/153	9
GO:1903793	positive regulation of anion transport	9/1235	50/18670	0.00502965	0.0720959	0.0611332	5244/552/5243/5608/5027/8399/8600/183/348	9
GO:1901186	positive regulation of ERBB signaling pathway	7/1235	33/18670	0.00508771	0.0726032	0.0615633	134/9026/55294/7039/183/2852/653361	7
GO:0060078	regulation of postsynaptic membrane potential	18/1235	140/18670	0.00509068	0.0726032	0.0615633	23316/2903/9162/134/1815/2904/4355/3751/9699/9378/2894/5024/784/23542/2557/5027/2570/153	18
GO:0044782	cilium organization	39/1235	384/18670	0.00511197	0.0727236	0.0616654	1540/123872/9696/9480/56171/3983/5347/3911/22897/23224/26074/1951/25886/55764/199221/5311/166379/85462/29887/154865/138639/6103/85452/7275/54768/199223/25937/54820/136332/5991/10938/30845/10677/54930/4751/3797/129880/50487/352909	39
GO:0032886	regulation of microtubule-based process	25/1235	218/18670	0.00513952	0.0729322	0.0618424	1540/123872/3925/64793/4130/5347/10274/117144/4926/10615/220134/25886/29899/56890/26586/8851/6683/79866/157922/221150/85459/4751/6790/126731/10460	25
GO:0060977	coronary vasculature morphogenesis	5/1235	18/18670	0.00520766	0.0733476	0.0621946	7049/8829/161742/23493/6899	5
GO:0072574	hepatocyte proliferation	5/1235	18/18670	0.00520766	0.0733476	0.0621946	634/55679/2735/55294/7128	5
GO:0072575	epithelial cell proliferation involved in liver morphogenesis	5/1235	18/18670	0.00520766	0.0733476	0.0621946	634/55679/2735/55294/7128	5
GO:0002064	epithelial cell development	24/1235	207/18670	0.00526459	0.0737825	0.0625633	9480/2195/54507/51742/23086/4647/389015/9370/9750/639/3383/91181/84283/54768/8626/2099/7111/25861/5991/9076/10653/3549/2683/4825	24
GO:0034284	response to monosaccharide	24/1235	207/18670	0.00526459	0.0737825	0.0625633	9971/2081/6717/7054/55107/5798/1292/9370/114/387597/3383/83667/10891/285/50507/5076/6518/5313/2852/4760/1490/388581/4825/389692	24
GO:0050673	epithelial cell proliferation	43/1235	434/18670	0.00529213	0.0739853	0.0627353	2081/90780/23411/5587/7049/7042/57608/8829/7421/634/6664/5798/6331/55764/22846/130367/64127/128239/55679/2735/26471/8626/55294/2099/5607/3664/2255/2152/5076/374/8013/947/7039/3549/6899/3815/8600/2683/7051/348/7128/2693/4825	43
GO:0042692	muscle cell differentiation	39/1235	385/18670	0.00533671	0.0744247	0.0631079	23345/23411/4703/10290/93166/3475/7248/963/552/79652/6830/9043/9254/8470/9750/9734/55553/7111/4621/64091/50507/7290/2255/6548/8538/23493/10938/493829/6899/3815/10266/183/2852/221476/55897/4878/58/338773/4303	39
GO:0010948	negative regulation of cell cycle process	37/1235	361/18670	0.00542487	0.0754683	0.0639928	991/1063/701/5347/5708/7023/4193/5311/9232/1112/4361/56890/51339/11200/55294/995/144455/7465/5888/286151/23512/2255/23429/51514/10403/51512/9700/10106/84861/84142/9319/4751/6790/2852/9212/26271/4303	37
GO:0045652	regulation of megakaryocyte differentiation	12/1235	79/18670	0.0055375	0.0768464	0.0651614	58508/3674/9757/26523/8357/5588/161882/8013/653604/8361/8365/8362	12
GO:0098739	import across plasma membrane	16/1235	120/18670	0.00563312	0.0779822	0.0661245	3770/389015/2055/6558/6506/6553/7226/6507/6548/3772/6518/481/6520/610/183/3761	16
GO:0009749	response to glucose	23/1235	197/18670	0.00571399	0.0789088	0.0669102	9971/2081/6717/7054/55107/5798/1292/9370/114/387597/3383/83667/10891/285/50507/5076/5313/2852/4760/1490/388581/4825/389692	23
GO:0045599	negative regulation of fat cell differentiation	9/1235	51/18670	0.00575705	0.0791175	0.0670872	23411/9370/166379/862/25937/161882/4488/4320/2852	9
GO:0051496	positive regulation of stress fiber assembly	9/1235	51/18670	0.00575705	0.0791175	0.0670872	22843/22998/7248/8829/7043/55604/50507/10174/1490	9
GO:0016569	covalent chromatin modification	46/1235	474/18670	0.00587548	0.0805495	0.0683014	9971/6018/90780/23411/57602/93166/58508/51742/5587/51322/11108/9733/51773/6830/4302/9757/1788/1789/7862/9734/1387/26053/56254/2959/5187/26993/79885/10891/5978/6304/4602/4524/5081/23476/23512/63976/9958/23429/79829/23210/3720/25862/6790/1810/387893/9212	46
GO:1902904	negative regulation of supramolecular fiber organization	18/1235	142/18670	0.00590409	0.0805619	0.0683119	3925/6708/57482/6710/9535/9026/26586/79822/55604/7111/1191/157922/395/286527/10677/50853/348/11013	18
GO:0051216	cartilage development	24/1235	209/18670	0.0059303	0.0805619	0.0683119	353500/1301/4322/7704/389084/1293/1292/25886/64764/2736/1277/55553/2487/5081/8538/176/8817/51320/3549/4488/51435/1490/1291/5744	24
GO:0051966	regulation of synaptic transmission, glutamatergic	11/1235	70/18670	0.00598031	0.0805619	0.0683119	23025/9162/134/9378/5021/2912/23542/4983/2918/1268/57616	11
GO:0051235	maintenance of location	33/1235	315/18670	0.00603101	0.0805619	0.0683119	6571/23345/23411/6717/338/4052/32/5311/19/1193/57338/29899/7226/8204/55294/2516/83860/1407/375387/286527/55283/5027/8399/81573/4601/10938/5777/4188/348/2852/7780/7070/11013	33
GO:0060840	artery development	14/1235	100/18670	0.00603752	0.0805619	0.0683119	56999/7042/8829/4854/338/4052/6092/5311/639/4091/23493/2702/6899/348	14
GO:0010765	positive regulation of sodium ion transport	7/1235	34/18670	0.00604807	0.0805619	0.0683119	1815/4302/6331/55800/6548/481/6330	7
GO:0033561	regulation of water loss via skin	6/1235	26/18670	0.00605464	0.0805619	0.0683119	57822/3925/84283/8626/9076/59344	6
GO:0042481	regulation of odontogenesis	6/1235	26/18670	0.00605464	0.0805619	0.0683119	4982/1435/152816/7020/80326/947	6
GO:0002371	dendritic cell cytokine production	4/1235	12/18670	0.00613743	0.0805619	0.0683119	7098/64127/9188/3815	4
GO:0014831	gastro-intestinal system smooth muscle contraction	4/1235	12/18670	0.00613743	0.0805619	0.0683119	5733/6865/3815/2693	4
GO:0032042	mitochondrial DNA metabolic process	4/1235	12/18670	0.00613743	0.0805619	0.0683119	7156/83667/10891/142	4
GO:0045472	response to ether	4/1235	12/18670	0.00613743	0.0805619	0.0683119	5244/7054/4193/10891	4
GO:0050910	detection of mechanical stimulus involved in sensory perception of sound	4/1235	12/18670	0.00613743	0.0805619	0.0683119	1301/84059/25861/3815	4
GO:0060670	branching involved in labyrinthine layer morphogenesis	4/1235	12/18670	0.00613743	0.0805619	0.0683119	8521/6692/7855/10653	4
GO:0060900	embryonic camera-type eye formation	4/1235	12/18670	0.00613743	0.0805619	0.0683119	6664/7020/5076/220	4
GO:0072697	protein localization to cell cortex	4/1235	12/18670	0.00613743	0.0805619	0.0683119	5347/4926/29899/54443	4
GO:1904668	positive regulation of ubiquitin protein ligase activity	4/1235	12/18670	0.00613743	0.0805619	0.0683119	991/5347/166979/11065	4
GO:0045778	positive regulation of ossification	13/1235	90/18670	0.00613847	0.0805619	0.0683119	5587/7042/7704/6664/84059/7043/8626/7020/56998/5027/4488/338773/26271	13
GO:0050730	regulation of peptidyl-tyrosine phosphorylation	28/1235	256/18670	0.00614672	0.0805619	0.0683119	2065/4254/51704/134/8829/9370/133396/1436/1741/3383/3263/57091/64092/55294/7525/5168/50507/2255/374/5777/7039/285489/3815/9094/183/11314/653361/7070	28
GO:0022898	regulation of transmembrane transporter activity	29/1235	268/18670	0.00622089	0.0813456	0.0689764	5142/6717/2903/776/4747/1815/2904/5311/1741/1193/57338/8811/5243/783/55800/784/10681/6236/23542/7871/10891/23072/6548/481/6330/30845/5174/4878/2859	29
GO:0031333	negative regulation of protein-containing complex assembly	17/1235	132/18670	0.00626229	0.0816984	0.0692756	3925/6708/57482/9928/6710/9026/51339/55604/7111/1191/56998/286527/4091/10677/50853/8543/11013	17
GO:0009410	response to xenobiotic stimulus	31/1235	292/18670	0.0063062	0.0819362	0.0694772	6571/116285/2903/5244/7054/1815/26050/7023/1788/4193/1789/9734/114/445/119391/3383/114907/1571/11200/5021/10891/1592/4258/1268/26227/9076/570/314/2678/6097/2693	31
GO:0003170	heart valve development	10/1235	61/18670	0.00634634	0.0819362	0.0694772	56999/7042/4193/6092/10439/639/4091/161882/23493/2702	10
GO:0032370	positive regulation of lipid transport	10/1235	61/18670	0.00634634	0.0819362	0.0694772	23411/5244/9370/19/4602/5608/5027/8399/8600/348	10
GO:0030879	mammary gland development	18/1235	143/18670	0.00634882	0.0819362	0.0694772	9914/90780/462/1435/7421/1436/2736/128239/9423/4939/7043/5021/2099/3664/2255/374/8600/4488	18
GO:0007093	mitotic cell cycle checkpoint	20/1235	165/18670	0.00635288	0.0819362	0.0694772	991/1063/701/5347/4193/1112/65975/4361/11200/995/144455/7465/7153/10403/51512/84861/9319/6790/9212/4303	20
GO:1903170	negative regulation of calcium ion transmembrane transport	8/1235	43/18670	0.00651868	0.0838835	0.0711284	6717/1815/5311/1193/784/10681/6236/2859	8
GO:0003179	heart valve morphogenesis	9/1235	52/18670	0.00656297	0.0840714	0.0712877	56999/7042/4193/6092/10439/4091/161882/23493/2702	9
GO:0048168	regulation of neuronal synaptic plasticity	9/1235	52/18670	0.00656297	0.0840714	0.0712877	6900/23025/57338/79772/6543/3815/183/348/93650	9
GO:0046632	alpha-beta T cell differentiation	14/1235	101/18670	0.00659419	0.0842805	0.0714651	7292/4063/7704/639/6304/4602/8320/161882/3142/26022/30009/3549/9308/6097	14
GO:0001696	gastric acid secretion	5/1235	19/18670	0.00668817	0.0850976	0.0721579	389015/9026/29887/5733/5021	5
GO:0072576	liver morphogenesis	5/1235	19/18670	0.00668817	0.0850976	0.0721579	634/55679/2735/55294/7128	5
GO:1904062	regulation of cation transmembrane transport	35/1235	342/18670	0.0068623	0.0871174	0.0738706	5142/6717/2903/776/4747/1815/2904/6331/5311/1741/1193/57338/8811/783/55800/784/10681/6236/23542/7871/10891/23072/1804/3781/6548/481/6330/5777/30845/183/2852/7070/5174/4878/2859	35
GO:0046777	protein autophosphorylation	26/1235	235/18670	0.0069849	0.0884753	0.075022	2081/91662/11213/5587/22853/2046/4140/9262/9370/1436/65975/4361/11200/152110/5292/9833/7525/8550/7294/3815/4751/6790/27102/7070/9212/1195	26
GO:0000086	G2/M transition of mitotic cell cycle	27/1235	247/18670	0.00709681	0.0896051	0.07598	1063/5347/5708/9928/22897/1112/5243/4361/9133/11200/993/995/6873/9833/54820/7465/79866/23476/7164/51514/2103/54930/4751/6790/9212/26271/4303	27
GO:0045453	bone resorption	10/1235	62/18670	0.00712953	0.0896051	0.07598	4982/1436/29887/50507/5027/3549/8600/5166/7128/338773	10
GO:0051294	establishment of spindle orientation	7/1235	35/18670	0.00713739	0.0896051	0.07598	5347/4926/3993/29899/54820/2255/10403	7
GO:0071312	cellular response to alkaloid	7/1235	35/18670	0.00713739	0.0896051	0.07598	840/7054/4193/114/3383/10891/5888	7
GO:0046683	response to organophosphorus	17/1235	134/18670	0.00726884	0.0910535	0.0772082	8061/2819/5798/9370/5311/445/1277/5024/53905/5187/6532/50507/5027/374/610/5313/24145	17
GO:0050768	negative regulation of neurogenesis	31/1235	295/18670	0.00728587	0.0910654	0.0772182	6900/10500/3475/7248/340533/8829/1949/4854/6664/53335/4211/4193/56920/57556/51265/10371/1620/10512/9423/6532/8851/5978/7161/57715/56963/26022/348/65078/7070/93650/4825	31
GO:0006929	substrate-dependent cell migration	6/1235	27/18670	0.00735695	0.0915167	0.0776009	22801/2046/8829/9423/4983/752	6
GO:0090169	regulation of spindle assembly	6/1235	27/18670	0.00735695	0.0915167	0.0776009	5347/10274/4926/10615/29899/126731	6
GO:0035710	CD4-positive, alpha-beta T cell activation	13/1235	92/18670	0.00738663	0.0915167	0.0776009	7292/4063/29126/6304/4602/11126/5588/161882/3142/26022/30009/9308/6097	13
GO:0019226	transmission of nerve impulse	11/1235	72/18670	0.00740857	0.0915167	0.0776009	8913/552/6331/3751/27345/5024/183/6329/2852/2693/2859	11
GO:0032272	negative regulation of protein polymerization	11/1235	72/18670	0.00740857	0.0915167	0.0776009	3925/6708/57482/6710/9026/55604/7111/286527/10677/50853/11013	11
GO:0055117	regulation of cardiac muscle contraction	12/1235	82/18670	0.00747442	0.0915167	0.0776009	5142/6717/134/6331/1193/6548/3728/2702/481/30845/1490/4878	12
GO:0010721	negative regulation of cell development	35/1235	344/18670	0.00749275	0.0915167	0.0776009	6900/10500/3475/7248/340533/8829/1949/4854/6664/53335/4211/4193/56920/57556/51265/10371/1620/10512/9423/6532/8851/2487/5978/55294/7161/57715/56963/26022/348/65078/221476/7070/93650/4825/5744	35
GO:0043200	response to amino acid	15/1235	113/18670	0.00750791	0.0915167	0.0776009	1788/53335/23677/445/1277/3383/83667/6506/4313/10891/1536/4524/84861/1490/1291	15
GO:0043244	regulation of protein-containing complex disassembly	15/1235	113/18670	0.00750791	0.0915167	0.0776009	6708/4130/57482/11213/6710/140775/26586/57466/55604/7111/6683/157922/2107/10677/50853	15
GO:0050982	detection of mechanical stimulus	8/1235	44/18670	0.00751594	0.0915167	0.0776009	342372/1301/5311/84059/784/25861/3728/3815	8
GO:0060412	ventricular septum morphogenesis	8/1235	44/18670	0.00751594	0.0915167	0.0776009	7049/7042/2535/6664/6092/161882/23493/2702	8
GO:1902667	regulation of axon guidance	8/1235	44/18670	0.00751594	0.0915167	0.0776009	10500/8829/56920/57556/10371/10512/57688/57715	8
GO:0048771	tissue remodeling	21/1235	179/18670	0.00760319	0.0923804	0.0783333	4982/7421/634/4193/1436/29887/10512/7043/4313/1943/64114/50507/2255/5027/2702/3549/8600/5166/183/7128/338773	21
GO:0043122	regulation of I-kappaB kinase/NF-kappaB signaling	26/1235	237/18670	0.00777514	0.0942673	0.0799333	9971/23411/51704/91662/5587/9370/7098/64127/80216/5187/10758/23118/2099/79931/55765/23476/7188/9188/9020/5966/8600/84270/60401/8743/8795/7128	26
GO:0098657	import into cell	22/1235	191/18670	0.00790447	0.0956306	0.0810893	6571/3770/1815/389015/2055/6558/6506/6553/6532/7226/376497/6507/4983/6548/3772/6518/481/6520/610/6580/183/3761	22
GO:0015711	organic anion transport	47/1235	495/18670	0.00800894	0.0961493	0.0815292	83733/9971/11136/10079/5172/5244/134/118980/1815/552/253512/634/64241/64849/246213/32/10864/117247/2055/19/5243/6506/65012/146167/376497/2912/200931/56606/6507/55113/5608/6533/9962/6539/6540/5027/8399/6513/6520/23539/54716/8600/1468/183/348/50487/2352	47
GO:2001257	regulation of cation channel activity	21/1235	180/18670	0.0080876	0.0961493	0.0815292	5142/6717/2903/4747/1815/2904/5311/1741/1193/57338/8811/783/784/10681/6236/23542/7871/10891/30845/4878/2859	21
GO:0007127	meiosis I	15/1235	114/18670	0.0081323	0.0961493	0.0815292	83990/5347/4438/9232/4361/54456/29893/5888/7153/9700/9319/6790/284071/29947/26271	15
GO:0015749	monosaccharide transmembrane transport	15/1235	114/18670	0.0081323	0.0961493	0.0815292	8218/148808/7248/9370/83667/6506/56606/673/7525/9962/125206/8013/6518/6513/388581	15
GO:0060350	endochondral bone morphogenesis	11/1235	73/18670	0.00821572	0.0961493	0.0815292	4322/4665/1293/1292/25886/1277/8817/3549/51435/338773/1291	11
GO:0051100	negative regulation of binding	20/1235	169/18670	0.00823885	0.0961493	0.0815292	3925/6717/9044/51773/7023/6664/9370/9750/51339/79822/55294/56998/161882/23493/4488/4188/4751/6790/3433/9212	20
GO:0006874	cellular calcium ion homeostasis	44/1235	458/18670	0.0082588	0.0961493	0.0815292	9914/1258/6717/2903/776/79608/134/1815/2904/7421/552/1240/9170/5311/114/1193/5733/57338/8811/783/5024/784/7226/5021/55013/2099/80045/6543/1268/55283/159371/118987/5027/25769/481/5777/666/3061/183/79568/348/2852/7070/2859	44
GO:0048880	sensory system development	37/1235	371/18670	0.00832227	0.0961493	0.0815292	57822/2195/90780/6498/7042/7054/8829/4647/84440/6664/4211/246213/55764/10371/2055/639/5979/7275/56890/10002/54549/7855/8842/7020/5308/28996/7111/6297/2255/23210/157506/5076/220/3549/7070/4760/4990	37
GO:0006012	galactose metabolic process	4/1235	13/18670	0.00840634	0.0961493	0.0815292	8534/130589/10891/2683	4
GO:0010838	positive regulation of keratinocyte proliferation	4/1235	13/18670	0.00840634	0.0961493	0.0815292	8626/2255/374/7051	4
GO:0016322	neuron remodeling	4/1235	13/18670	0.00840634	0.0961493	0.0815292	2046/53335/59277/10882	4
GO:0031650	regulation of heat generation	4/1235	13/18670	0.00840634	0.0961493	0.0815292	5733/376497/1268/8600	4
GO:0032488	Cdc42 protein signal transduction	4/1235	13/18670	0.00840634	0.0961493	0.0815292	8829/19/9423/348	4
GO:0042711	maternal behavior	4/1235	13/18670	0.00840634	0.0961493	0.0815292	552/1620/5021/153222	4
GO:0045779	negative regulation of bone resorption	4/1235	13/18670	0.00840634	0.0961493	0.0815292	4982/5027/7128/338773	4
GO:0051315	attachment of mitotic spindle microtubules to kinetochore	4/1235	13/18670	0.00840634	0.0961493	0.0815292	81929/11004/83540/10403	4
GO:0060746	parental behavior	4/1235	13/18670	0.00840634	0.0961493	0.0815292	552/1620/5021/153222	4
GO:0061469	regulation of type B pancreatic cell proliferation	4/1235	13/18670	0.00840634	0.0961493	0.0815292	5798/130367/26471/8013	4
GO:0070208	protein heterotrimerization	4/1235	13/18670	0.00840634	0.0961493	0.0815292	1292/9370/1277/1291	4
GO:0071872	cellular response to epinephrine stimulus	4/1235	13/18670	0.00840634	0.0961493	0.0815292	5142/9370/6548/5313	4
GO:0032663	regulation of interleukin-2 production	9/1235	54/18670	0.00843161	0.0961493	0.0815292	9971/5142/5588/53833/947/30009/9454/9308/7128	9
GO:0045747	positive regulation of Notch signaling pathway	9/1235	54/18670	0.00843161	0.0961493	0.0815292	7042/6092/64127/1387/8626/2255/3815/4242/55897	9
GO:0007389	pattern specification process	43/1235	446/18670	0.00843374	0.0961493	0.0815292	123872/57822/9095/54778/1952/8829/7704/10194/6092/55764/5311/10371/5090/10512/2736/57453/2735/7855/8626/5308/28996/5081/56998/5991/2255/8320/4091/2016/23493/5076/60529/1045/3549/6899/4488/4188/6790/129880/4242/269/4760/55897/4825	43
GO:0023019	signal transduction involved in regulation of gene expression	5/1235	20/18670	0.00843981	0.0961493	0.0815292	142/4072/4488/4760/55897	5
GO:0031061	negative regulation of histone methylation	5/1235	20/18670	0.00843981	0.0961493	0.0815292	23411/6830/4302/1789/3720	5
GO:0034104	negative regulation of tissue remodeling	5/1235	20/18670	0.00843981	0.0961493	0.0815292	4982/5027/183/7128/338773	5
GO:0086014	atrial cardiac muscle cell action potential	5/1235	20/18670	0.00843981	0.0961493	0.0815292	6331/783/55800/3781/2702	5
GO:0086026	atrial cardiac muscle cell to AV node cell signaling	5/1235	20/18670	0.00843981	0.0961493	0.0815292	6331/783/55800/3781/2702	5
GO:0086066	atrial cardiac muscle cell to AV node cell communication	5/1235	20/18670	0.00843981	0.0961493	0.0815292	6331/783/55800/3781/2702	5
GO:0042771	intrinsic apoptotic signaling pathway in response to DNA damage by p53 class mediator	8/1235	45/18670	0.00862375	0.0977647	0.0828989	23411/64782/26471/11200/8626/28996/79915/7161	8
GO:0048483	autonomic nervous system development	8/1235	45/18670	0.00862375	0.0977647	0.0828989	8829/6664/10371/5979/8626/7020/3142/6899	8
GO:0002573	myeloid leukocyte differentiation	23/1235	204/18670	0.00863341	0.0977647	0.0828989	23411/4254/1435/116071/634/9370/7098/133396/1436/29887/1943/55294/28962/7097/56998/146433/375387/3930/142/161882/3815/8600/27102	23
GO:0006022	aminoglycan metabolic process	20/1235	170/18670	0.00877499	0.0991697	0.0840902	5016/84002/10090/51363/8534/1463/9348/2817/6448/3697/5292/89792/6548/176/9956/9394/2331/2683/10331/374907	20
GO:0006029	proteoglycan metabolic process	13/1235	94/18670	0.00882724	0.0993635	0.0842546	10090/1301/51363/1463/9348/2817/6448/89792/9951/176/9956/9394/3549	13
GO:1901216	positive regulation of neuron death	13/1235	94/18670	0.00882724	0.0993635	0.0842546	8301/134/7042/2904/26471/8851/5978/55294/7020/4602/1191/142/5913	13
GO:0034698	response to gonadotropin	6/1235	28/18670	0.00884987	0.0994206	0.084303	5069/2046/7049/3383/10891/2693	6
GO:0050922	negative regulation of chemotaxis	10/1235	64/18670	0.00891817	0.0999894	0.0847853	10500/8829/56920/6092/57556/10371/10512/285/79148/57715	10
GO:0051494	negative regulation of cytoskeleton organization	18/1235	148/18670	0.00899852	0.100691	0.0853802	3925/6708/57482/6710/9535/9026/56890/26586/79822/55604/7111/157922/395/286527/10677/50853/4751/11013	18
GO:0002718	regulation of cytokine production involved in immune response	12/1235	84/18670	0.00903621	0.100913	0.0855687	51704/7292/11213/7042/7098/64127/7043/7855/11126/8013/9188/30009	12
GO:0001895	retina homeostasis	11/1235	74/18670	0.00908944	0.101272	0.0858727	9696/1258/166379/84059/2055/7275/56890/8842/25861/2103/4069	11
GO:0001503	ossification	39/1235	398/18670	0.00910409	0.101272	0.0858727	353500/9923/22801/7286/5587/1301/1435/7042/4322/7704/4665/6664/84059/29887/2736/1277/90993/2735/7043/4313/25937/8626/5978/7020/56998/7290/5027/4091/8817/374/9188/3549/8600/4488/1490/338773/1291/26271/5744	39
GO:0008593	regulation of Notch signaling pathway	14/1235	105/18670	0.00924306	0.102616	0.0870126	7042/3993/4854/6092/64127/1387/8626/55294/2255/23555/23493/3815/4242/55897	14
GO:0034219	carbohydrate transmembrane transport	15/1235	116/18670	0.00950468	0.104921	0.0889672	8218/148808/7248/9370/83667/6506/56606/673/7525/9962/125206/8013/6518/6513/388581	15
GO:0002819	regulation of adaptive immune response	19/1235	160/18670	0.00950628	0.104921	0.0889672	23411/7292/6830/634/5817/29126/3263/7855/64092/8417/11126/79915/5588/5027/53833/3142/5777/30009/7128	19
GO:0021915	neural tube development	19/1235	160/18670	0.00950628	0.104921	0.0889672	57822/7248/7042/2535/6664/55764/5311/10512/2736/51339/6692/6297/4524/5081/26227/5076/10653/8463/8543	19
GO:0001654	eye development	36/1235	362/18670	0.00954915	0.105065	0.0890893	57822/2195/90780/6498/7042/7054/8829/4647/84440/6664/4211/246213/55764/2055/639/5979/7275/56890/10002/54549/7855/8842/7020/5308/28996/7111/6297/2255/23210/157506/5076/220/3549/7070/4760/4990	36
GO:0048592	eye morphogenesis	18/1235	149/18670	0.00962201	0.105065	0.0890893	2195/7054/4647/6664/4211/55764/639/10002/54549/7855/8842/7020/5308/28996/5076/220/3549/7070	18
GO:0051092	positive regulation of NF-kappaB transcription factor activity	18/1235	149/18670	0.00962201	0.105065	0.0890893	58484/7185/11213/5587/8877/54101/7098/64127/3383/23118/1191/7097/7188/5588/219790/8600/60401/183	18
GO:0060041	retina development in camera-type eye	18/1235	149/18670	0.00962201	0.105065	0.0890893	7042/8829/84440/246213/2055/5979/7275/56890/10002/54549/8842/7020/28996/23210/5076/3549/7070/4760	18
GO:2001056	positive regulation of cysteine-type endopeptidase activity	18/1235	149/18670	0.00962201	0.105065	0.0890893	23411/91662/58484/2903/2904/7023/9026/5978/26999/9966/2152/23787/666/8743/2852/8795/1490/10017	18
GO:0050679	positive regulation of epithelial cell proliferation	23/1235	206/18670	0.00966056	0.105065	0.0890893	23411/5587/57608/8829/6664/5798/6331/64127/128239/8626/5607/2255/2152/5076/374/8013/7039/3549/6899/2683/7051/7128/2693	23
GO:0034405	response to fluid shear stress	7/1235	37/18670	0.009742	0.105065	0.0890893	5311/19/445/7043/5607/5027/4091	7
GO:0048846	axon extension involved in axon guidance	7/1235	37/18670	0.009742	0.105065	0.0890893	10500/8829/56920/57556/10371/10512/57715	7
GO:0060236	regulation of mitotic spindle organization	7/1235	37/18670	0.009742	0.105065	0.0890893	5347/10274/4926/29899/79866/126731/10460	7
GO:0060323	head morphogenesis	7/1235	37/18670	0.009742	0.105065	0.0890893	83690/1277/7043/4313/4621/3549/6899	7
GO:1902284	neuron projection extension involved in neuron projection guidance	7/1235	37/18670	0.009742	0.105065	0.0890893	10500/8829/56920/57556/10371/10512/57715	7
GO:2000142	regulation of DNA-templated transcription, initiation	7/1235	37/18670	0.009742	0.105065	0.0890893	8061/2959/2099/54700/56998/23493/1810	7
GO:0001754	eye photoreceptor cell differentiation	8/1235	46/18670	0.0098492	0.105418	0.0893885	7054/4647/639/10002/54549/8842/3549/7070	8
GO:0045776	negative regulation of blood pressure	8/1235	46/18670	0.0098492	0.105418	0.0893885	134/9370/6051/143872/1268/2702/4878/153	8
GO:0050919	negative chemotaxis	8/1235	46/18670	0.0098492	0.105418	0.0893885	10500/56920/6092/57556/10371/10512/9423/57715	8
GO:0060711	labyrinthine layer development	8/1235	46/18670	0.0098492	0.105418	0.0893885	8521/22846/6692/7855/9394/23493/1045/10653	8
GO:0050854	regulation of antigen receptor-mediated signaling pathway	10/1235	65/18670	0.00993212	0.106105	0.089971	1540/634/23228/11126/9404/5777/11314/933/7070/257144	10
GO:0021510	spinal cord development	14/1235	106/18670	0.010021	0.106382	0.0902056	4747/6664/64211/6092/55764/5311/2055/5090/2736/5081/26227/8543/3110/4825	14
GO:1901989	positive regulation of cell cycle phase transition	14/1235	106/18670	0.010021	0.106382	0.0902056	8444/4193/8318/2735/993/11065/995/79915/23476/2255/51514/894/9700/26271	14
GO:0032970	regulation of actin filament-based process	38/1235	388/18670	0.0100233	0.106382	0.0902056	57822/3925/6708/5142/54551/22843/4703/22998/57482/6717/7248/134/8829/6710/9535/6331/9026/1436/3383/55616/7043/8851/7226/79822/55604/7111/395/50507/286527/6548/123720/3728/2702/10677/50853/10174/1490/11013	38
GO:0043242	negative regulation of protein-containing complex disassembly	11/1235	75/18670	0.0100332	0.106382	0.0902056	6708/57482/11213/6710/26586/57466/55604/7111/157922/10677/50853	11
GO:0003002	regionalization	35/1235	351/18670	0.0100912	0.106797	0.0905578	123872/9095/1952/8829/7704/10194/6092/55764/10371/5090/10512/2736/57453/2735/7855/8626/5308/28996/5081/56998/2255/8320/4091/2016/23493/5076/60529/1045/6899/4488/4188/6790/4760/55897/4825	35
GO:0042063	gliogenesis	30/1235	290/18670	0.0101236	0.10694	0.0906786	6900/2065/8521/1435/7042/4665/23224/6664/1436/55553/2817/6692/8851/79885/4602/1191/80045/7097/7161/146433/375387/2255/26227/2016/5076/374/26022/666/25825/4825	30
GO:0002700	regulation of production of molecular mediator of immune response	17/1235	139/18670	0.0103622	0.109054	0.0924712	51704/7292/11213/7042/6830/7098/64127/3263/7043/7855/11126/79915/8013/9188/30009/933/5225	17
GO:0051588	regulation of neurotransmitter transport	17/1235	139/18670	0.0103622	0.109054	0.0924712	23025/776/9627/9162/1815/9699/27345/783/6532/79772/6865/1268/5027/339302/8600/2852/4878	17
GO:0003177	pulmonary valve development	5/1235	21/18670	0.010485	0.109128	0.0925347	7042/6092/4091/23493/2702	5
GO:0003283	atrial septum development	5/1235	21/18670	0.010485	0.109128	0.0925347	7042/4193/161882/23493/2702	5
GO:0014821	phasic smooth muscle contraction	5/1235	21/18670	0.010485	0.109128	0.0925347	5733/5024/6865/3815/2693	5
GO:0030277	maintenance of gastrointestinal epithelium	5/1235	21/18670	0.010485	0.109128	0.0925347	57482/4588/64127/55765/4760	5
GO:0031935	regulation of chromatin silencing	5/1235	21/18670	0.010485	0.109128	0.0925347	23411/29028/54454/8318/7290	5
GO:2000678	negative regulation of transcription regulatory region DNA binding	5/1235	21/18670	0.010485	0.109128	0.0925347	6717/6664/55294/23493/4488	5
GO:0000132	establishment of mitotic spindle orientation	6/1235	29/18670	0.0105475	0.109177	0.0925762	5347/4926/29899/54820/2255/10403	6
GO:0010669	epithelial structure maintenance	6/1235	29/18670	0.0105475	0.109177	0.0925762	9696/57482/4588/64127/55765/4760	6
GO:0033032	regulation of myeloid cell apoptotic process	6/1235	29/18670	0.0105475	0.109177	0.0925762	23411/4254/9370/64127/338442/2693	6
GO:0086002	cardiac muscle cell action potential involved in contraction	9/1235	56/18670	0.0106785	0.110332	0.093555	8913/776/6331/783/55800/3781/3728/2702/6330	9
GO:1902903	regulation of supramolecular fiber organization	35/1235	353/18670	0.0109569	0.111836	0.0948304	3925/6708/54551/4130/22843/22998/57482/7248/8829/4926/6710/9535/9026/3383/55616/26586/7043/8851/79822/55604/7111/1191/6683/157922/395/50507/286527/6548/123720/10677/50853/348/10174/1490/11013	35
GO:0051785	positive regulation of nuclear division	10/1235	66/18670	0.0110315	0.111836	0.0948304	4926/8877/11065/685/9700/51203/7039/4488/6790/1618	10
GO:1904888	cranial skeletal system development	10/1235	66/18670	0.0110315	0.111836	0.0948304	158326/7042/1112/7043/8626/7020/6913/157506/6899/4488	10
GO:0048844	artery morphogenesis	11/1235	76/18670	0.0110504	0.111836	0.0948304	56999/7042/8829/4854/338/5311/639/23493/2702/6899/348	11
GO:0050000	chromosome localization	11/1235	76/18670	0.0110504	0.111836	0.0948304	1063/4928/9928/4926/10615/81929/54820/11004/83540/10403/284071	11
GO:0048593	camera-type eye morphogenesis	15/1235	118/18670	0.0110539	0.111836	0.0948304	2195/7054/6664/4211/55764/54549/7855/8842/7020/5308/28996/5076/220/3549/7070	15
GO:0003206	cardiac chamber morphogenesis	16/1235	129/18670	0.0111254	0.111836	0.0948304	7049/1301/7042/8829/2535/6664/4193/6092/10512/4091/161882/23493/2702/6899/4488/55897	16
GO:0002834	regulation of response to tumor cell	4/1235	14/18670	0.0111613	0.111836	0.0948304	634/5817/29126/11126	4
GO:0002837	regulation of immune response to tumor cell	4/1235	14/18670	0.0111613	0.111836	0.0948304	634/5817/29126/11126	4
GO:0003188	heart valve formation	4/1235	14/18670	0.0111613	0.111836	0.0948304	10439/161882/23493/2702	4
GO:0007100	mitotic centrosome separation	4/1235	14/18670	0.0111613	0.111836	0.0948304	64793/54820/4751/6790	4
GO:0010457	centriole-centriole cohesion	4/1235	14/18670	0.0111613	0.111836	0.0948304	9696/23224/23177/4751	4
GO:0010935	regulation of macrophage cytokine production	4/1235	14/18670	0.0111613	0.111836	0.0948304	51704/11213/7042/7043	4
GO:0032310	prostaglandin secretion	4/1235	14/18670	0.0111613	0.111836	0.0948304	5608/5027/8399/8600	4
GO:0042487	regulation of odontogenesis of dentin-containing tooth	4/1235	14/18670	0.0111613	0.111836	0.0948304	4982/1435/152816/80326	4
GO:0045217	cell-cell junction maintenance	4/1235	14/18670	0.0111613	0.111836	0.0948304	144100/1436/25861/55765	4
GO:2001212	regulation of vasculogenesis	4/1235	14/18670	0.0111613	0.111836	0.0948304	634/23493/947/10266	4
GO:0042551	neuron maturation	8/1235	47/18670	0.0111994	0.111836	0.0948304	6900/2046/53335/5979/59277/23787/10882/54738	8
GO:0060351	cartilage development involved in endochondral bone morphogenesis	8/1235	47/18670	0.0111994	0.111836	0.0948304	4322/1293/1292/25886/1277/3549/51435/1291	8
GO:0150063	visual system development	36/1235	366/18670	0.011229	0.111934	0.0949136	57822/2195/90780/6498/7042/7054/8829/4647/84440/6664/4211/246213/55764/2055/639/5979/7275/56890/10002/54549/7855/8842/7020/5308/28996/7111/6297/2255/23210/157506/5076/220/3549/7070/4760/4990	36
GO:0001825	blastocyst formation	7/1235	38/18670	0.0112767	0.112015	0.0949825	6498/6830/705/8320/1045/26469/4242	7
GO:0051693	actin filament capping	7/1235	38/18670	0.0112767	0.112015	0.0949825	6708/57482/6710/55604/7111/10677/50853	7
GO:0006942	regulation of striated muscle contraction	13/1235	97/18670	0.0113909	0.112754	0.0956092	5142/6717/134/6331/1193/6548/3728/2702/481/30845/6329/1490/4878	13
GO:0051591	response to cAMP	13/1235	97/18670	0.0113909	0.112754	0.0956092	8061/2819/5798/9370/5311/445/1277/53905/5187/50507/374/610/5313	13
GO:0045931	positive regulation of mitotic cell cycle	19/1235	163/18670	0.0114796	0.113434	0.0961852	64094/4926/8877/4193/8318/993/11065/995/23476/685/2255/51514/10403/894/9700/51203/7039/6790/26271	19
GO:1901987	regulation of cell cycle phase transition	45/1235	480/18670	0.0115317	0.11375	0.0964533	991/1063/701/5347/5708/8444/9928/22897/7023/4193/8318/5311/1112/4361/2735/51339/11200/152110/993/11065/55294/995/144455/54820/7465/79915/23476/2255/51514/10403/54443/51512/894/9700/5777/10106/84861/84142/9319/54930/4751/6790/9212/26271/4303	45
GO:0097305	response to alcohol	25/1235	233/18670	0.0116441	0.114659	0.0972244	7292/2903/4747/7049/7054/1815/8061/57476/2904/552/1788/54762/9370/5423/114/19/3383/1571/1536/5888/1268/142/3728/9076/57655	25
GO:1903169	regulation of calcium ion transmembrane transport	18/1235	152/18670	0.0117019	0.114907	0.0974343	5142/6717/1815/5311/1193/57338/783/784/10681/6236/6548/481/5777/30845/2852/7070/4878/2859	18
GO:0071156	regulation of cell cycle arrest	14/1235	108/18670	0.0117301	0.114907	0.0974343	7023/4193/5311/8851/11200/995/144455/7161/2255/51512/6790/2852/4760/4303	14
GO:1904659	glucose transmembrane transport	14/1235	108/18670	0.0117301	0.114907	0.0974343	8218/148808/7248/9370/83667/6506/56606/673/7525/125206/8013/6518/6513/388581	14
GO:0051055	negative regulation of lipid biosynthetic process	9/1235	57/18670	0.0119574	0.116729	0.0989793	9971/23411/8877/634/376497/5978/55294/348/2852	9
GO:0051310	metaphase plate congression	9/1235	57/18670	0.0119574	0.116729	0.0989793	1063/9928/4926/10615/81929/11004/83540/10403/284071	9
GO:0044706	multi-multicellular organism process	24/1235	222/18670	0.0121542	0.118446	0.100435	5016/5069/8061/7421/552/639/7043/4313/6532/5021/705/2099/285/1268/6513/6866/3549/2683/10266/183/8909/4878/2693/5744	24
GO:0043010	camera-type eye development	32/1235	319/18670	0.0124065	0.120152	0.101882	57822/2195/90780/6498/7042/7054/8829/84440/6664/4211/246213/55764/2055/5979/7275/56890/10002/54549/7855/8842/7020/5308/28996/7111/2255/23210/157506/5076/220/3549/7070/4760	32
GO:0003413	chondrocyte differentiation involved in endochondral bone morphogenesis	6/1235	30/18670	0.0124636	0.120152	0.101882	1293/1292/25886/3549/51435/1291	6
GO:0010743	regulation of macrophage derived foam cell differentiation	6/1235	30/18670	0.0124636	0.120152	0.101882	1435/338/9370/19/8399/183	6
GO:0021696	cerebellar cortex morphogenesis	6/1235	30/18670	0.0124636	0.120152	0.101882	9928/64211/2736/2735/25861/4983	6
GO:0021772	olfactory bulb development	6/1235	30/18670	0.0124636	0.120152	0.101882	9928/6092/1436/10371/1943/8320	6
GO:0042133	neurotransmitter metabolic process	18/1235	153/18670	0.0124692	0.120152	0.101882	2903/7054/5311/445/3383/6532/6507/1191/1119/7097/133121/6470/26227/26002/570/947/7915/183	18
GO:0007179	transforming growth factor beta receptor signaling pathway	22/1235	199/18670	0.0124778	0.120152	0.101882	9480/23411/57530/6498/54778/7049/7042/6664/4052/1387/7043/2661/28996/63976/9958/375387/142/4091/2331/23592/8425/269	22
GO:0051261	protein depolymerization	14/1235	109/18670	0.0126657	0.121698	0.103193	3925/6708/4130/57482/6710/26586/55604/7111/6683/157922/11004/10677/50853/126731	14
GO:0045933	positive regulation of muscle contraction	8/1235	48/18670	0.0126813	0.121698	0.103193	8877/5021/6865/3815/2852/1490/4878/2693	8
GO:0032409	regulation of transporter activity	29/1235	283/18670	0.0127757	0.122369	0.103762	5142/6717/2903/776/4747/1815/2904/5311/1741/1193/57338/8811/5243/783/55800/784/10681/6236/23542/7871/10891/23072/6548/481/6330/30845/5174/4878/2859	29
GO:0017015	regulation of transforming growth factor beta receptor signaling pathway	15/1235	120/18670	0.0127945	0.122369	0.103762	9480/23411/6498/54778/7049/6664/4052/1387/7043/28996/63976/375387/4091/23592/8425	15
GO:0044342	type B pancreatic cell proliferation	5/1235	22/18670	0.0128447	0.122435	0.103818	5798/130367/26471/8013/4825	5
GO:1904666	regulation of ubiquitin protein ligase activity	5/1235	22/18670	0.0128447	0.122435	0.103818	991/5347/166979/11065/26271	5
GO:0003007	heart morphogenesis	27/1235	259/18670	0.0128943	0.122702	0.104044	123872/9095/7049/1301/7042/7054/8829/2535/6664/4193/6092/5311/10439/10512/129446/5292/5308/4091/161882/23493/2702/8463/3549/6899/4488/129880/55897	27
GO:0031345	negative regulation of cell projection organization	21/1235	188/18670	0.0129314	0.122848	0.104168	10500/3475/7248/8829/2904/1949/53335/4193/56920/57556/51265/10371/10512/9423/8851/57715/56963/348/65078/7070/93650	21
GO:0055090	acylglycerol homeostasis	7/1235	39/18670	0.012979	0.122889	0.104203	9971/23411/9969/134/83667/51129/348	7
GO:0070328	triglyceride homeostasis	7/1235	39/18670	0.012979	0.122889	0.104203	9971/23411/9969/134/83667/51129/348	7
GO:2000243	positive regulation of reproductive process	11/1235	78/18670	0.0133195	0.125901	0.106757	10371/5021/993/995/136242/2516/6865/4488/6790/284071/1618	11
GO:0035904	aorta development	9/1235	58/18670	0.013347	0.125923	0.106776	56999/7042/4052/6092/5311/639/4091/23493/6899	9
GO:0062014	negative regulation of small molecule metabolic process	13/1235	99/18670	0.0133972	0.125923	0.106776	9971/23411/634/32/9370/26471/10891/5978/1407/1268/142/348/388581	13
GO:0032868	response to insulin	28/1235	272/18670	0.0134521	0.125923	0.106776	9971/23411/7248/634/5798/9370/132864/9734/3383/83667/376497/7352/7097/1407/6548/142/5588/2549/6513/493829/5166/5313/183/8743/388581/4878/2693/4303	28
GO:0002292	T cell differentiation involved in immune response	10/1235	68/18670	0.013504	0.125923	0.106776	7292/7248/4063/4602/8320/161882/3142/26022/30009/6097	10
GO:0003407	neural retina development	10/1235	68/18670	0.013504	0.125923	0.106776	7042/84440/246213/54549/8842/7020/28996/3549/7070/4760	10
GO:0019915	lipid storage	10/1235	68/18670	0.013504	0.125923	0.106776	23411/338/32/19/8204/55294/1407/8399/10938/348	10
GO:0035924	cellular response to vascular endothelial growth factor stimulus	10/1235	68/18670	0.013504	0.125923	0.106776	2081/64094/5587/57608/8829/8877/57556/25960/2549/10266	10
GO:0071230	cellular response to amino acid stimulus	10/1235	68/18670	0.013504	0.125923	0.106776	1788/53335/23677/445/1277/83667/4313/1536/84861/1291	10
GO:0031056	regulation of histone modification	17/1235	143/18670	0.013522	0.125923	0.106776	90780/23411/5587/9733/6830/4302/9757/1789/26053/56254/26993/10891/4602/4524/5081/23476/3720	17
GO:0060021	roof of mouth development	12/1235	89/18670	0.0140541	0.130501	0.110658	90780/7049/7042/2535/10194/6664/7043/7020/3664/63976/60529/6899	12
GO:1902749	regulation of cell cycle G2/M phase transition	23/1235	213/18670	0.0140597	0.130501	0.110658	1063/5347/5708/8444/9928/22897/1112/4361/152110/993/995/54820/79915/23476/51514/51512/84142/54930/4751/6790/9212/26271/4303	23
GO:0110053	regulation of actin filament organization	27/1235	261/18670	0.0141553	0.130781	0.110895	3925/6708/54551/22843/22998/57482/7248/8829/6710/9535/9026/3383/55616/7043/79822/55604/7111/395/50507/286527/6548/123720/10677/50853/10174/1490/11013	27
GO:0010975	regulation of neuron projection development	46/1235	499/18670	0.0142075	0.130781	0.110895	6900/10154/991/23316/10500/6498/10090/3475/114788/7248/23025/5587/4747/8829/1949/53335/4193/56920/6092/57556/51265/10371/64764/9699/10439/10512/5653/9423/5979/26039/8851/57688/23072/11178/54700/1268/23011/57715/56963/10677/183/348/65078/7070/93650/4825	46
GO:0003044	regulation of systemic arterial blood pressure mediated by a chemical signal	8/1235	49/18670	0.014302	0.130781	0.110895	91608/552/1359/5021/6518/2702/183/153	8
GO:0003254	regulation of membrane depolarization	8/1235	49/18670	0.014302	0.130781	0.110895	8913/6331/55800/7871/142/5027/2702/666	8
GO:0048546	digestive tract morphogenesis	8/1235	49/18670	0.014302	0.130781	0.110895	6664/2736/2735/51339/8626/2255/3142/3549	8
GO:0009415	response to water	4/1235	15/18670	0.0144363	0.130781	0.110895	7054/552/5311/84918	4
GO:0014874	response to stimulus involved in regulation of muscle adaptation	4/1235	15/18670	0.0144363	0.130781	0.110895	6331/114907/10891/183	4
GO:0021924	cell proliferation in external granule layer	4/1235	15/18670	0.0144363	0.130781	0.110895	64211/2736/2735/6532	4
GO:0021930	cerebellar granule cell precursor proliferation	4/1235	15/18670	0.0144363	0.130781	0.110895	64211/2736/2735/6532	4
GO:0046851	negative regulation of bone remodeling	4/1235	15/18670	0.0144363	0.130781	0.110895	4982/5027/7128/338773	4
GO:0051299	centrosome separation	4/1235	15/18670	0.0144363	0.130781	0.110895	64793/54820/4751/6790	4
GO:0055089	fatty acid homeostasis	4/1235	15/18670	0.0144363	0.130781	0.110895	9971/23411/134/348	4
GO:0090136	epithelial cell-cell adhesion	4/1235	15/18670	0.0144363	0.130781	0.110895	144100/3728/3549/3815	4
GO:0098719	sodium ion import across plasma membrane	4/1235	15/18670	0.0144363	0.130781	0.110895	389015/6553/6548/610	4
GO:1902969	mitotic DNA replication	4/1235	15/18670	0.0144363	0.130781	0.110895	8318/11200/4175/5888	4
GO:0021988	olfactory lobe development	6/1235	31/18670	0.0146113	0.131734	0.111703	9928/6092/1436/10371/1943/8320	6
GO:0031572	G2 DNA damage checkpoint	6/1235	31/18670	0.0146113	0.131734	0.111703	5347/1112/4361/51514/84142/4303	6
GO:0040020	regulation of meiotic nuclear division	6/1235	31/18670	0.0146113	0.131734	0.111703	991/286151/9319/4488/1618/26271	6
GO:1903844	regulation of cellular response to transforming growth factor beta stimulus	15/1235	122/18670	0.0147415	0.132069	0.111987	9480/23411/6498/54778/7049/6664/4052/1387/7043/28996/63976/375387/4091/23592/8425	15
GO:0015850	organic hydroxy compound transport	27/1235	262/18670	0.0148219	0.132069	0.111987	6571/9971/23411/5244/114880/1815/57476/634/338/64241/54762/9370/19/29881/6532/5021/200931/4602/1191/1268/8399/23539/6580/183/57655/348/2693	27
GO:0000183	rDNA heterochromatin assembly	7/1235	40/18670	0.0148583	0.132069	0.111987	23411/8357/79829/653604/8361/8365/8362	7
GO:0007618	mating	7/1235	40/18670	0.0148583	0.132069	0.111987	4808/7054/552/6532/5021/23542/1268	7
GO:0035315	hair cell differentiation	7/1235	40/18670	0.0148583	0.132069	0.111987	4647/9750/5308/25861/55283/23493/5459	7
GO:0044058	regulation of digestive system process	7/1235	40/18670	0.0148583	0.132069	0.111987	64241/9026/5733/5021/2255/4760/2693	7
GO:0045124	regulation of bone resorption	7/1235	40/18670	0.0148583	0.132069	0.111987	4982/1436/5027/8600/5166/7128/338773	7
GO:0045823	positive regulation of heart contraction	7/1235	40/18670	0.0148583	0.132069	0.111987	7042/552/55800/23493/1490/4878/153	7
GO:0071548	response to dexamethasone	7/1235	40/18670	0.0148583	0.132069	0.111987	7023/1789/445/3383/114907/9076/2693	7
GO:0071300	cellular response to retinoic acid	10/1235	69/18670	0.0148856	0.132081	0.111997	19/1620/1277/5979/6532/4602/7525/5076/8463/6899	10
GO:0046578	regulation of Ras protein signal transduction	25/1235	238/18670	0.0149063	0.132081	0.111997	3925/4254/9162/1435/9928/7042/8829/9828/440073/23101/9750/19/26053/143872/50649/27128/84904/4983/389337/2255/23229/5662/348/65078/2859	25
GO:1905952	regulation of lipid localization	18/1235	156/18670	0.0150115	0.132805	0.112611	23411/5244/338/64241/32/9370/19/55294/2661/4602/5608/1407/5027/8399/10938/8600/183/348	18
GO:0031058	positive regulation of histone modification	12/1235	90/18670	0.0152719	0.134269	0.113852	23411/5587/9733/1789/26053/56254/26993/10891/4602/5081/23476/3720	12
GO:0042475	odontogenesis of dentin-containing tooth	12/1235	90/18670	0.0152719	0.134269	0.113852	4982/3911/1435/6331/152816/2736/54757/8626/80326/2255/6899/4488	12
GO:0045185	maintenance of protein location	12/1235	90/18670	0.0152719	0.134269	0.113852	23345/6717/4052/5311/2516/83860/375387/286527/81573/4601/4188/11013	12
GO:0046849	bone remodeling	12/1235	90/18670	0.0152719	0.134269	0.113852	4982/1436/29887/7043/1943/50507/5027/3549/8600/5166/7128/338773	12
GO:0015813	L-glutamate transmembrane transport	5/1235	23/18670	0.0155386	0.135145	0.114595	83733/246213/2055/6506/6507	5
GO:0032373	positive regulation of sterol transport	5/1235	23/18670	0.0155386	0.135145	0.114595	23411/5244/9370/19/348	5
GO:0032376	positive regulation of cholesterol transport	5/1235	23/18670	0.0155386	0.135145	0.114595	23411/5244/9370/19/348	5
GO:0071157	negative regulation of cell cycle arrest	5/1235	23/18670	0.0155386	0.135145	0.114595	7023/4193/11200/2255/2852	5
GO:0072243	metanephric nephron epithelium development	5/1235	23/18670	0.0155386	0.135145	0.114595	9370/5311/25937/38/5076	5
GO:0089718	amino acid import across plasma membrane	5/1235	23/18670	0.0155386	0.135145	0.114595	2055/6506/6507/6520/183	5
GO:1902254	negative regulation of intrinsic apoptotic signaling pathway by p53 class mediator	5/1235	23/18670	0.0155386	0.135145	0.114595	23411/4193/54700/79915/50484	5
GO:0051402	neuron apoptotic process	25/1235	239/18670	0.0156387	0.135807	0.115156	2065/4747/9928/7042/8829/116986/5423/7043/26471/8851/8626/10891/55294/7020/28996/23321/4602/142/5913/54463/8013/666/348/2020/5459	25
GO:0031532	actin cytoskeleton reorganization	13/1235	101/18670	0.0156643	0.135822	0.115169	8476/8829/9535/1436/221981/26053/57091/7226/2255/123720/8394/2549/3815	13
GO:0002065	columnar/cuboidal epithelial cell differentiation	14/1235	112/18670	0.0158217	0.136351	0.115618	4647/6664/9750/639/8626/25861/5991/55283/2016/23493/1045/4760/5459/4825	14
GO:0008645	hexose transmembrane transport	14/1235	112/18670	0.0158217	0.136351	0.115618	8218/148808/7248/9370/83667/6506/56606/673/7525/125206/8013/6518/6513/388581	14
GO:0015918	sterol transport	14/1235	112/18670	0.0158217	0.136351	0.115618	23411/5244/114880/57476/338/64241/54762/9370/19/29881/1191/8399/57655/348	14
GO:0060419	heart growth	14/1235	112/18670	0.0158217	0.136351	0.115618	7049/7042/4211/32/8470/2735/5292/7161/3720/23493/183/221476/55897/4878	14
GO:0031570	DNA integrity checkpoint	18/1235	157/18670	0.0159435	0.137192	0.116331	83990/5347/51322/4193/8318/1112/65975/4361/11200/995/144455/7153/1407/51514/51512/84142/6790/4303	18
GO:0010171	body morphogenesis	8/1235	50/18670	0.0160681	0.137676	0.116741	83690/55764/1277/7043/4313/4621/3549/6899	8
GO:0086009	membrane repolarization	8/1235	50/18670	0.0160681	0.137676	0.116741	776/6331/784/3781/2702/481/6330/4878	8
GO:0007565	female pregnancy	21/1235	192/18670	0.0160971	0.137676	0.116741	5016/5069/8061/7421/639/7043/4313/5021/705/2099/285/1268/6513/6866/3549/10266/183/8909/4878/2693/5744	21
GO:0044272	sulfur compound biosynthetic process	21/1235	192/18670	0.0160971	0.137676	0.116741	55256/10090/51363/8534/1463/84532/32/119391/9348/4524/38/4258/176/9524/79993/2331/2687/2678/2683/5166/10331	21
GO:0051056	regulation of small GTPase mediated signal transduction	33/1235	338/18670	0.0162587	0.138765	0.117665	3925/4254/117289/84144/9162/1435/9928/7042/8829/2/9828/440073/23101/9750/19/57568/26053/9938/143872/79822/50649/27128/84904/4983/395/389337/2255/23229/9754/5662/348/65078/2859	33
GO:0034764	positive regulation of transmembrane transport	22/1235	204/18670	0.0162734	0.138765	0.117665	8218/6717/1815/9370/5311/8811/5243/783/6506/784/673/6548/5027/8013/481/30845/183/2852/7070/5174/388581/4878	22
GO:0051384	response to glucocorticoid	17/1235	146/18670	0.016352	0.138959	0.117829	4747/5069/7054/8061/552/7023/1789/9370/445/3383/114907/5978/7352/153222/374/9076/2693	17
GO:0003341	cilium movement	10/1235	70/18670	0.0163698	0.138959	0.117829	123872/56171/55811/55567/117144/1770/26074/54768/5991/126731	10
GO:0061515	myeloid cell development	10/1235	70/18670	0.0163698	0.138959	0.117829	4211/55553/55294/7097/375387/161882/23210/5777/3815/8600	10
GO:0060606	tube closure	12/1235	91/18670	0.0165679	0.14043	0.119077	57822/7248/7042/2535/55764/6692/4524/2255/5076/10653/8463/8543	12
GO:0000079	regulation of cyclin-dependent protein serine/threonine kinase activity	13/1235	102/18670	0.016902	0.141785	0.120226	2965/5347/7023/5311/9133/8851/245711/993/57018/995/894/905/7128	13
GO:0007098	centrosome cycle	15/1235	124/18670	0.0169098	0.141785	0.120226	9696/64793/5347/23224/25886/5311/84552/56890/23177/54820/159989/85459/54930/4751/6790	15
GO:0051101	regulation of DNA binding	15/1235	124/18670	0.0169098	0.141785	0.120226	6717/51773/7023/6664/2959/55294/28996/5081/56998/142/23493/4488/4188/4751/4760	15
GO:0006111	regulation of gluconeogenesis	7/1235	41/18670	0.0169235	0.141785	0.120226	23411/9370/83667/57223/10891/1407/388581	7
GO:0030835	negative regulation of actin filament depolymerization	7/1235	41/18670	0.0169235	0.141785	0.120226	6708/57482/6710/55604/7111/10677/50853	7
GO:0035136	forelimb morphogenesis	7/1235	41/18670	0.0169235	0.141785	0.120226	7704/55764/8626/7020/157506/60529/4488	7
GO:0050873	brown fat cell differentiation	7/1235	41/18670	0.0169235	0.141785	0.120226	23411/9370/4329/10891/63976/8800/153	7
GO:0042491	inner ear auditory receptor cell differentiation	6/1235	32/18670	0.0170032	0.141785	0.120226	4647/9750/25861/55283/23493/5459	6
GO:0045987	positive regulation of smooth muscle contraction	6/1235	32/18670	0.0170032	0.141785	0.120226	8877/5021/6865/3815/2852/2693	6
GO:0046685	response to arsenic-containing substance	6/1235	32/18670	0.0170032	0.141785	0.120226	4982/4747/132864/119391/1371/51593	6
GO:0060325	face morphogenesis	6/1235	32/18670	0.0170032	0.141785	0.120226	83690/1277/7043/4313/4621/6899	6
GO:0010876	lipid localization	39/1235	415/18670	0.0171265	0.142603	0.120919	23460/9971/23411/10079/5244/114880/1815/57476/10350/634/338/64241/32/54762/9370/2055/19/29881/5243/376497/8204/200931/55294/2661/55113/4602/5608/1191/1119/1407/118987/5027/8399/10938/8600/183/57655/348/50487	39
GO:0043393	regulation of protein binding	23/1235	217/18670	0.0172122	0.142897	0.121168	1540/3925/6708/5347/7049/8829/4140/9026/9370/9750/51339/23228/28996/56998/161882/8600/6790/9618/348/4242/340061/3433/9212	23
GO:0060348	bone development	23/1235	217/18670	0.0172122	0.142897	0.121168	158326/4322/4665/4211/1293/1292/25886/1112/1277/7043/55294/7020/5308/161882/8817/5777/3549/3815/8600/4488/51435/338773/1291	23
GO:0007269	neurotransmitter secretion	19/1235	170/18670	0.017355	0.143661	0.121816	6571/93664/23025/776/9627/9162/440279/9699/27345/9378/783/8618/79772/6865/1268/5027/339302/8676/2852	19
GO:0099643	signal release from synapse	19/1235	170/18670	0.017355	0.143661	0.121816	6571/93664/23025/776/9627/9162/440279/9699/27345/9378/783/8618/79772/6865/1268/5027/339302/8676/2852	19
GO:0031098	stress-activated protein kinase signaling cascade	31/1235	315/18670	0.0175303	0.1449	0.122867	1540/2081/142679/440193/7042/9043/8877/80122/7098/10371/64127/51339/5187/7855/23542/5470/23118/28996/5607/285613/55765/5608/55872/7164/9020/8600/60401/183/9618/653361/1490	31
GO:0072503	cellular divalent inorganic cation homeostasis	45/1235	493/18670	0.0177488	0.146467	0.124196	9914/1258/6717/2903/776/79608/134/1815/2904/7421/552/1240/9170/5311/114/1193/5733/57338/8811/783/5024/784/7226/5021/55013/2099/80045/6543/1268/55283/159371/118987/5027/25769/481/5777/666/3061/183/79568/348/2852/7780/7070/2859	45
GO:0050678	regulation of epithelial cell proliferation	36/1235	378/18670	0.0177716	0.146467	0.124196	90780/23411/5587/7049/7042/57608/8829/7421/634/6664/5798/6331/55764/22846/130367/64127/128239/55679/2735/26471/8626/55294/5607/2255/2152/5076/374/8013/7039/3549/6899/2683/7051/348/7128/2693	36
GO:0051924	regulation of calcium ion transport	26/1235	254/18670	0.0178963	0.146649	0.12435	9914/5142/6717/776/283229/1815/5311/1193/57338/3383/783/5024/784/10681/6236/6548/5027/481/5777/9454/30845/183/2852/7070/4878/2859	26
GO:0009994	oocyte differentiation	8/1235	51/18670	0.0179864	0.146649	0.12435	9757/2661/79670/9319/6790/284071/1618/26271	8
GO:0021545	cranial nerve development	8/1235	51/18670	0.0179864	0.146649	0.12435	2065/8829/10371/7020/6507/5076/6899/5459	8
GO:0090102	cochlea development	8/1235	51/18670	0.0179864	0.146649	0.12435	57822/2535/246213/2736/2487/23493/5076/6899	8
GO:0097366	response to bronchodilator	8/1235	51/18670	0.0179864	0.146649	0.12435	6571/2903/2983/7054/1815/9734/3383/5021	8
GO:2001258	negative regulation of cation channel activity	8/1235	51/18670	0.0179864	0.146649	0.12435	6717/1815/5311/1193/784/10681/6236/2859	8
GO:0010001	glial cell differentiation	23/1235	218/18670	0.0180812	0.146649	0.12435	6900/2065/8521/4665/6664/55553/2817/6692/79885/1191/80045/7097/7161/146433/375387/2255/26227/2016/5076/26022/666/25825/4825	23
GO:0002287	alpha-beta T cell activation involved in immune response	9/1235	61/18670	0.018234	0.146649	0.12435	7292/4063/4602/8320/161882/3142/26022/30009/6097	9
GO:0002293	alpha-beta T cell differentiation involved in immune response	9/1235	61/18670	0.018234	0.146649	0.12435	7292/4063/4602/8320/161882/3142/26022/30009/6097	9
GO:0032233	positive regulation of actin filament bundle assembly	9/1235	61/18670	0.018234	0.146649	0.12435	22843/22998/7248/8829/7043/55604/50507/10174/1490	9
GO:0010875	positive regulation of cholesterol efflux	4/1235	16/18670	0.0182599	0.146649	0.12435	23411/9370/19/348	4
GO:0021534	cell proliferation in hindbrain	4/1235	16/18670	0.0182599	0.146649	0.12435	64211/2736/2735/6532	4
GO:0032305	positive regulation of icosanoid secretion	4/1235	16/18670	0.0182599	0.146649	0.12435	5608/5027/8399/8600	4
GO:0060413	atrial septum morphogenesis	4/1235	16/18670	0.0182599	0.146649	0.12435	7042/161882/23493/2702	4
GO:0060572	morphogenesis of an epithelial bud	4/1235	16/18670	0.0182599	0.146649	0.12435	2736/8626/2255/157506	4
GO:0072224	metanephric glomerulus development	4/1235	16/18670	0.0182599	0.146649	0.12435	9370/5979/5076/947	4
GO:0097067	cellular response to thyroid hormone stimulus	4/1235	16/18670	0.0182599	0.146649	0.12435	4005/10891/3815/2693	4
GO:1902358	sulfate transmembrane transport	4/1235	16/18670	0.0182599	0.146649	0.12435	5172/253512/65012/1468	4
GO:0035107	appendage morphogenesis	17/1235	148/18670	0.0184799	0.147789	0.125316	7042/7704/6664/55764/10512/2736/1387/9496/8626/7020/4621/2255/157506/2702/60529/3549/4488	17
GO:0035108	limb morphogenesis	17/1235	148/18670	0.0184799	0.147789	0.125316	7042/7704/6664/55764/10512/2736/1387/9496/8626/7020/4621/2255/157506/2702/60529/3549/4488	17
GO:0003418	growth plate cartilage chondrocyte differentiation	5/1235	24/18670	0.0185845	0.147789	0.125316	1293/1292/25886/51435/1291	5
GO:0003433	chondrocyte development involved in endochondral bone morphogenesis	5/1235	24/18670	0.0185845	0.147789	0.125316	1293/1292/25886/51435/1291	5
GO:0036315	cellular response to sterol	5/1235	24/18670	0.0185845	0.147789	0.125316	57476/54762/19/6097/57655	5
GO:0051446	positive regulation of meiotic cell cycle	5/1235	24/18670	0.0185845	0.147789	0.125316	993/995/4488/284071/1618	5
GO:0060343	trabecula formation	5/1235	24/18670	0.0185845	0.147789	0.125316	7049/1277/4313/23493/4488	5
GO:0090287	regulation of cellular response to growth factor stimulus	29/1235	292/18670	0.0188557	0.149546	0.126807	9480/64094/23411/6498/54778/7049/57608/4926/79652/6664/4052/57556/1387/90993/2817/7043/26999/345193/28996/25960/63976/375387/2255/4091/8817/23592/8425/4488/183	29
GO:0009266	response to temperature stimulus	25/1235	243/18670	0.0188583	0.149546	0.126807	23411/4928/134/55107/124535/8531/81929/286133/1387/5024/7226/376497/10891/2766/100101267/7352/6548/84918/947/8086/5313/11168/49860/153/56925	25
GO:0006869	lipid transport	36/1235	380/18670	0.0191121	0.151347	0.128333	23460/9971/23411/10079/5244/114880/1815/57476/10350/634/338/64241/32/54762/9370/2055/19/29881/5243/376497/200931/2661/55113/4602/5608/1191/1119/1407/118987/5027/8399/8600/183/57655/348/50487	36
GO:0006654	phosphatidic acid biosynthetic process	7/1235	42/18670	0.0191832	0.151486	0.128451	9971/23259/2819/51205/376497/254531/8399	7
GO:0099622	cardiac muscle cell membrane repolarization	7/1235	42/18670	0.0191832	0.151486	0.128451	776/6331/3781/2702/481/6330/4878	7
GO:0032874	positive regulation of stress-activated MAPK cascade	19/1235	172/18670	0.0194033	0.152609	0.129404	2081/142679/7042/9043/8877/7098/10371/64127/7855/23542/28996/285613/55765/7164/8600/60401/9618/653361/1490	19
GO:0046634	regulation of alpha-beta T cell activation	12/1235	93/18670	0.0194063	0.152609	0.129404	7292/7704/29126/639/4602/11126/5588/3142/30009/3549/9308/11314	12
GO:1901184	regulation of ERBB signaling pathway	12/1235	93/18670	0.0194063	0.152609	0.129404	134/634/9026/55294/685/374/7039/26469/183/2852/653361/93650	12
GO:0006023	aminoglycan biosynthetic process	14/1235	115/18670	0.0195472	0.152717	0.129495	84002/10090/51363/8534/1463/9348/2817/176/9956/9394/2331/2683/10331/374907	14
GO:0008630	intrinsic apoptotic signaling pathway in response to DNA damage	13/1235	104/18670	0.0195979	0.152717	0.129495	23411/6498/64782/5423/26471/11200/8626/28996/1191/79915/7161/666/10017	13
GO:0019233	sensory perception of pain	13/1235	104/18670	0.0195979	0.152717	0.129495	2903/134/55107/3751/5024/55800/784/1268/6548/5027/54463/59344/56925	13
GO:0010837	regulation of keratinocyte proliferation	6/1235	33/18670	0.0196511	0.152717	0.129495	5587/7421/8626/2255/374/7051	6
GO:0033028	myeloid cell apoptotic process	6/1235	33/18670	0.0196511	0.152717	0.129495	23411/4254/9370/64127/338442/2693	6
GO:0035115	embryonic forelimb morphogenesis	6/1235	33/18670	0.0196511	0.152717	0.129495	55764/8626/7020/157506/60529/4488	6
GO:0070536	protein K63-linked deubiquitination	6/1235	33/18670	0.0196511	0.152717	0.129495	1540/55432/220213/8975/54764/7128	6
GO:1901797	negative regulation of signal transduction by p53 class mediator	6/1235	33/18670	0.0196511	0.152717	0.129495	23411/8444/4193/54700/79915/50484	6
GO:0000281	mitotic cytokinesis	10/1235	72/18670	0.0196628	0.152717	0.129495	3925/5347/24137/26586/6683/54443/9700/51203/9493/9094	10
GO:0071695	anatomical structure maturation	24/1235	232/18670	0.0198588	0.154028	0.130607	6900/2046/9928/7042/53335/84283/5979/59277/4313/8851/7855/5991/23787/5076/79670/3549/9319/4488/6790/10882/1618/54738/26271/4825	24
GO:0010959	regulation of metal ion transport	37/1235	394/18670	0.0200202	0.154978	0.131413	9914/5142/6717/776/134/283229/1815/4302/6331/5311/1193/57338/8811/3383/783/5024/55800/784/10681/6236/5187/7871/23072/1804/3781/6548/5027/481/6330/5777/9454/30845/183/2852/7070/4878/2859	37
GO:0032653	regulation of interleukin-10 production	8/1235	52/18670	0.0200634	0.154978	0.131413	7292/29126/64127/55765/7097/53833/947/9308	8
GO:2000677	regulation of transcription regulatory region DNA binding	8/1235	52/18670	0.0200634	0.154978	0.131413	6717/6664/2959/55294/142/23493/4488/4760	8
GO:0032623	interleukin-2 production	9/1235	62/18670	0.0201197	0.155201	0.131602	9971/5142/5588/53833/947/30009/9454/9308/7128	9
GO:0007249	I-kappaB kinase/NF-kappaB signaling	27/1235	269/18670	0.0202197	0.155761	0.132076	9971/23411/51704/91662/5587/9370/7098/64127/80216/5187/10758/23118/2099/79931/55765/23476/7097/7188/9188/9020/5966/8600/84270/60401/8743/8795/7128	27
GO:0070304	positive regulation of stress-activated protein kinase signaling cascade	19/1235	173/18670	0.0204951	0.157667	0.133693	2081/142679/7042/9043/8877/7098/10371/64127/7855/23542/28996/285613/55765/7164/8600/60401/9618/653361/1490	19
GO:1901879	regulation of protein depolymerization	11/1235	83/18670	0.0205239	0.157675	0.133699	6708/4130/57482/6710/26586/55604/7111/6683/157922/10677/50853	11
GO:1990778	protein localization to cell periphery	31/1235	319/18670	0.0205529	0.157684	0.133707	9914/54843/8301/5347/3911/2903/4926/9370/29899/783/7275/55800/784/285172/64114/7871/112609/8417/1804/163882/23555/5913/3728/8394/54443/481/5064/30845/10266/2852/2693	31
GO:0051480	regulation of cytosolic calcium ion concentration	34/1235	357/18670	0.0207836	0.159164	0.134962	1258/6717/2903/776/79608/134/2904/552/1240/9170/5311/114/1193/5733/57338/8811/783/5024/784/7226/5021/2099/80045/1268/55283/159371/5027/5777/666/3061/183/2852/7070/2859	34
GO:0048738	cardiac muscle tissue development	24/1235	233/18670	0.0208021	0.159164	0.134962	2065/4703/56999/7248/7049/1301/7042/4211/8470/55553/129446/2735/5292/7161/50507/6548/161882/3720/23493/2702/183/221476/55897/4878	24
GO:0045765	regulation of angiogenesis	36/1235	383/18670	0.021273	0.162548	0.137831	64094/23411/56999/5587/7042/57608/8829/161742/8877/634/7098/57556/9734/22846/26523/90993/55294/28996/25960/1536/5607/11126/5168/285/51129/2152/3728/2549/8817/947/10266/1870/183/7128/2693/4303	36
GO:0060968	regulation of gene silencing	16/1235	139/18670	0.021438	0.163588	0.138713	23411/4928/29028/81929/54454/8318/26523/2099/100101267/8357/7290/8086/653604/8361/8365/8362	16
GO:1903524	positive regulation of blood circulation	10/1235	73/18670	0.0214798	0.163629	0.138748	7042/552/3383/55800/5021/23493/2702/1490/4878/153	10
GO:0048872	homeostasis of number of cells	25/1235	246/18670	0.0215983	0.163629	0.138748	1540/4352/6708/5142/4254/6498/8444/7049/1435/55619/5423/387597/55553/338442/9133/51301/28996/54700/5027/161882/23210/2016/53833/3815/7128	25
GO:2001252	positive regulation of chromosome organization	19/1235	174/18670	0.0216335	0.163629	0.138748	23411/5587/9733/4926/1789/26053/56254/4361/26993/10891/4602/5081/23476/5588/8550/3720/9700/4751/9212	19
GO:0010863	positive regulation of phospholipase C activity	7/1235	43/18670	0.0216457	0.163629	0.138748	552/9170/2099/395/7294/3815/183	7
GO:0043616	keratinocyte proliferation	7/1235	43/18670	0.0216457	0.163629	0.138748	5587/7421/8626/3664/2255/374/7051	7
GO:0046473	phosphatidic acid metabolic process	7/1235	43/18670	0.0216457	0.163629	0.138748	9971/23259/2819/51205/376497/254531/8399	7
GO:0051602	response to electrical stimulus	7/1235	43/18670	0.0216457	0.163629	0.138748	7054/10891/5978/6865/6548/5027/5064	7
GO:1901342	regulation of vasculature development	39/1235	422/18670	0.0217668	0.164325	0.139338	64094/23411/56999/5587/7042/57608/8829/161742/8877/634/7098/57556/9734/22846/26523/90993/55294/28996/25960/1536/5607/11126/5168/285/51129/2152/3728/2549/8817/23493/947/3815/10266/1870/183/2852/7128/2693/4303	39
GO:0002683	negative regulation of immune system process	40/1235	435/18670	0.0218757	0.164552	0.139531	4254/7292/11213/134/7042/7704/2/634/6664/4211/9370/7098/133396/9750/55824/29126/7043/23228/64092/55294/11126/1268/161882/79148/53833/3142/131450/9404/5777/30009/3549/11314/933/2852/7128/7070/257144/8361/8365/8362	40
GO:0043523	regulation of neuron apoptotic process	22/1235	210/18670	0.0219677	0.164552	0.139531	2065/4747/9928/7042/8829/116986/7043/26471/8851/10891/55294/7020/28996/23321/4602/142/5913/54463/8013/666/348/2020	22
GO:0051291	protein heterooligomerization	15/1235	128/18670	0.0219707	0.164552	0.139531	1258/7248/2904/1292/9370/5311/1277/8357/3728/9076/64376/8361/1291/8365/8362	15
GO:0007214	gamma-aminobutyric acid signaling pathway	5/1235	25/18670	0.0219985	0.164552	0.139531	6558/23228/165829/2557/2570	5
GO:0031069	hair follicle morphogenesis	5/1235	25/18670	0.0219985	0.164552	0.139531	7042/84283/8626/80326/2255	5
GO:0060444	branching involved in mammary gland duct morphogenesis	5/1235	25/18670	0.0219985	0.164552	0.139531	1435/7421/2099/374/4488	5
GO:0046530	photoreceptor cell differentiation	9/1235	63/18670	0.0221421	0.164552	0.139531	1258/7054/4647/639/10002/54549/8842/3549/7070	9
GO:0045840	positive regulation of mitotic nuclear division	8/1235	53/18670	0.0223053	0.164552	0.139531	4926/8877/11065/685/9700/51203/7039/6790	8
GO:0050702	interleukin-1 beta secretion	8/1235	53/18670	0.0223053	0.164552	0.139531	91662/58484/19/64127/7855/5027/24145/7128	8
GO:0060563	neuroepithelial cell differentiation	8/1235	53/18670	0.0223053	0.164552	0.139531	4647/6664/9750/25861/55283/2016/23493/5459	8
GO:1902475	L-alpha-amino acid transmembrane transport	8/1235	53/18670	0.0223053	0.164552	0.139531	83733/11136/246213/2055/6506/6507/6520/183	8
GO:0007613	memory	14/1235	117/18670	0.0223758	0.164552	0.139531	23316/4130/2903/7054/9757/114/1620/57338/6532/5021/6543/1268/25769/348	14
GO:0032892	positive regulation of organic acid transport	6/1235	34/18670	0.022566	0.164552	0.139531	552/5608/5027/8399/8600/183	6
GO:0048566	embryonic digestive tract development	6/1235	34/18670	0.022566	0.164552	0.139531	7042/6664/2736/2255/3142/3549	6
GO:0070050	neuron cellular homeostasis	6/1235	34/18670	0.022566	0.164552	0.139531	4130/776/134/783/4753/1268	6
GO:0097009	energy homeostasis	6/1235	34/18670	0.022566	0.164552	0.139531	353500/32/10891/112609/8013/51320	6
GO:1904029	regulation of cyclin-dependent protein kinase activity	13/1235	106/18670	0.0226044	0.164552	0.139531	2965/5347/7023/5311/9133/8851/245711/993/57018/995/894/905/7128	13
GO:0002418	immune response to tumor cell	4/1235	17/18670	0.0226552	0.164552	0.139531	634/5817/29126/11126	4
GO:0008272	sulfate transport	4/1235	17/18670	0.0226552	0.164552	0.139531	5172/253512/65012/1468	4
GO:0010744	positive regulation of macrophage derived foam cell differentiation	4/1235	17/18670	0.0226552	0.164552	0.139531	1435/338/8399/183	4
GO:0015732	prostaglandin transport	4/1235	17/18670	0.0226552	0.164552	0.139531	5608/5027/8399/8600	4
GO:0021783	preganglionic parasympathetic fiber development	4/1235	17/18670	0.0226552	0.164552	0.139531	8829/10371/7020/6899	4
GO:0032740	positive regulation of interleukin-17 production	4/1235	17/18670	0.0226552	0.164552	0.139531	4063/8877/64127/5588	4
GO:0035855	megakaryocyte development	4/1235	17/18670	0.0226552	0.164552	0.139531	4211/161882/5777/3815	4
GO:0042994	cytoplasmic sequestering of transcription factor	4/1235	17/18670	0.0226552	0.164552	0.139531	6717/5311/4601/4188	4
GO:0051969	regulation of transmission of nerve impulse	4/1235	17/18670	0.0226552	0.164552	0.139531	552/183/2693/2859	4
GO:0070166	enamel mineralization	4/1235	17/18670	0.0226552	0.164552	0.139531	152816/54757/6899/4488	4
GO:0099509	regulation of presynaptic cytosolic calcium ion concentration	4/1235	17/18670	0.0226552	0.164552	0.139531	776/134/783/1268	4
GO:1904355	positive regulation of telomere capping	4/1235	17/18670	0.0226552	0.164552	0.139531	5588/8550/4751/9212	4
GO:0043414	macromolecule methylation	30/1235	309/18670	0.0226688	0.164552	0.139531	9971/6018/90780/23411/93166/58508/51742/11108/6830/4839/4302/9757/1788/1789/26053/56254/54456/152992/6304/4602/4524/5081/23476/2107/23512/63976/142/3720/387893/29947	30
GO:0003018	vascular process in circulatory system	19/1235	175/18670	0.0228198	0.165436	0.140281	3778/134/552/634/27345/3383/143872/6532/5021/7525/6865/56998/2702/10266/183/348/2852/4878/153	19
GO:0045444	fat cell differentiation	23/1235	223/18670	0.0229543	0.166199	0.140927	23411/7704/1240/9370/166379/862/4329/2487/25937/10891/63976/2255/4091/161882/8013/8800/51320/4488/6097/4320/2852/59344/153	23
GO:0001890	placenta development	17/1235	152/18670	0.0233681	0.168462	0.142847	8521/8061/7421/3294/5311/22846/639/6692/7855/144455/8320/9394/23493/1045/10653/4188/2693	17
GO:0031670	cellular response to nutrient	10/1235	74/18670	0.0234157	0.168462	0.142847	9971/83990/7421/53335/4193/1277/5024/5292/1536/5027	10
GO:0043367	CD4-positive, alpha-beta T cell differentiation	10/1235	74/18670	0.0234157	0.168462	0.142847	7292/4063/6304/4602/161882/3142/26022/30009/9308/6097	10
GO:0051145	smooth muscle cell differentiation	10/1235	74/18670	0.0234157	0.168462	0.142847	23411/93166/79652/2255/23493/3815/10266/2852/55897/4303	10
GO:0072395	signal transduction involved in cell cycle checkpoint	10/1235	74/18670	0.0234157	0.168462	0.142847	5347/6664/4193/11200/995/144455/51514/51512/84142/6790	10
GO:0071383	cellular response to steroid hormone stimulus	25/1235	248/18670	0.0235908	0.169507	0.143732	9971/23411/7421/7023/1789/445/9667/3383/114907/10002/5187/8204/8626/10891/5978/167465/2099/2516/153222/1407/142/2103/8013/6097/2852	25
GO:0002028	regulation of sodium ion transport	11/1235	85/18670	0.0240904	0.170022	0.144169	1815/4302/6331/55800/5187/7871/23072/6548/5027/481/6330	11
GO:0019319	hexose biosynthetic process	11/1235	85/18670	0.0240904	0.170022	0.144169	23411/51363/2819/2026/9370/83667/57223/10891/1407/1468/388581	11
GO:0006979	response to oxidative stress	41/1235	451/18670	0.0241757	0.170022	0.144169	475/23411/7248/5587/2983/8061/9973/8877/5798/4193/9370/132864/5311/2055/1277/83667/1571/53905/4313/7226/10891/5978/55294/9833/1536/79772/4602/7352/50507/9962/142/5076/374/8013/51435/348/50484/11168/7128/653361/29920	41
GO:0030330	DNA damage response, signal transduction by p53 class mediator	13/1235	107/18670	0.0242301	0.170022	0.144169	23411/8444/161742/7023/4193/83667/11200/995/28996/144455/51512/6790/387893	13
GO:1901607	alpha-amino acid biosynthetic process	9/1235	64/18670	0.024306	0.170022	0.144169	55256/10157/445/6507/4524/6470/26227/2678/29920	9
GO:0003416	endochondral bone growth	7/1235	44/18670	0.0243189	0.170022	0.144169	4322/1293/1292/25886/4488/51435/1291	7
GO:0007019	microtubule depolymerization	7/1235	44/18670	0.0243189	0.170022	0.144169	3925/4130/26586/6683/157922/11004/126731	7
GO:0038084	vascular endothelial growth factor signaling pathway	7/1235	44/18670	0.0243189	0.170022	0.144169	64094/5587/57608/8829/57556/25960/2549	7
GO:0001660	fever generation	3/1235	10/18670	0.0243832	0.170022	0.144169	5733/1268/8600	3
GO:0006930	substrate-dependent cell migration, cell extension	3/1235	10/18670	0.0243832	0.170022	0.144169	8829/9423/4983	3
GO:0009157	deoxyribonucleoside monophosphate biosynthetic process	3/1235	10/18670	0.0243832	0.170022	0.144169	7084/7083/6470	3
GO:0016102	diterpenoid biosynthetic process	3/1235	10/18670	0.0243832	0.170022	0.144169	64577/157506/220	3
GO:0021562	vestibulocochlear nerve development	3/1235	10/18670	0.0243832	0.170022	0.144169	8829/5076/5459	3
GO:0030311	poly-N-acetyllactosamine biosynthetic process	3/1235	10/18670	0.0243832	0.170022	0.144169	84002/10331/374907	3
GO:0035871	protein K11-linked deubiquitination	3/1235	10/18670	0.0243832	0.170022	0.144169	55432/80124/7128	3
GO:0043084	penile erection	3/1235	10/18670	0.0243832	0.170022	0.144169	552/5021/1268	3
GO:0045657	positive regulation of monocyte differentiation	3/1235	10/18670	0.0243832	0.170022	0.144169	1435/56998/146433	3
GO:0051255	spindle midzone assembly	3/1235	10/18670	0.0243832	0.170022	0.144169	24137/9493/9212	3
GO:0060033	anatomical structure regression	3/1235	10/18670	0.0243832	0.170022	0.144169	2736/2735/269	3
GO:0060346	bone trabecula formation	3/1235	10/18670	0.0243832	0.170022	0.144169	1277/4313/4488	3
GO:0060513	prostatic bud formation	3/1235	10/18670	0.0243832	0.170022	0.144169	2736/8626/2255	3
GO:0070472	regulation of uterine smooth muscle contraction	3/1235	10/18670	0.0243832	0.170022	0.144169	5021/6865/2852	3
GO:2000109	regulation of macrophage apoptotic process	3/1235	10/18670	0.0243832	0.170022	0.144169	23411/64127/2693	3
GO:2001214	positive regulation of vasculogenesis	3/1235	10/18670	0.0243832	0.170022	0.144169	634/947/10266	3
GO:0007015	actin filament organization	37/1235	400/18670	0.0246105	0.171396	0.145334	3925/2195/6708/54551/22843/4703/22998/57482/7248/8829/6710/9535/9026/85462/8470/84940/3383/55616/9938/7043/57091/79822/55604/7111/8522/395/50507/286527/6548/123720/10677/50853/10174/1490/11013/58/2693	37
GO:0030199	collagen fibril organization	8/1235	54/18670	0.0247182	0.171934	0.14579	50509/1301/7042/1277/9509/176/2331/4320	8
GO:0019932	second-messenger-mediated signaling	40/1235	439/18670	0.0249072	0.172763	0.146493	2065/6717/139378/2903/2983/2904/552/1240/283383/8877/5311/9699/114/19/1193/5733/57338/8811/5024/7226/29995/112609/2516/79772/6548/5027/481/9454/8600/7462/10266/183/933/348/2852/4760/4878/153/5744/389692	40
GO:0007050	cell cycle arrest	24/1235	237/18670	0.0249289	0.172763	0.146493	2081/6498/7042/7023/4193/5311/22846/1620/8851/11200/995/144455/3664/8522/5608/7161/2255/123720/51512/6790/2852/4760/23645/4303	24
GO:0032872	regulation of stress-activated MAPK cascade	24/1235	237/18670	0.0249289	0.172763	0.146493	1540/2081/142679/7042/9043/8877/7098/10371/64127/51339/5187/7855/23542/5470/28996/285613/55765/55872/7164/8600/60401/9618/653361/1490	24
GO:0007160	cell-matrix adhesion	23/1235	225/18670	0.0251657	0.174191	0.147704	9480/22801/50509/3911/56999/22998/158326/7248/340533/1435/8515/8829/7007/3674/395/10420/6548/123720/3728/8394/947/7070/1490	23
GO:0048469	cell maturation	19/1235	177/18670	0.0253408	0.175119	0.148491	6900/2046/9928/53335/84283/5979/59277/7855/5991/23787/79670/3549/9319/6790/10882/1618/54738/26271/4825	19
GO:0051303	establishment of chromosome localization	10/1235	75/18670	0.0254746	0.175119	0.148491	1063/9928/4926/10615/81929/54820/11004/83540/10403/284071	10
GO:0005996	monosaccharide metabolic process	28/1235	287/18670	0.0255065	0.175119	0.148491	23411/9563/51363/8534/2819/2026/32/9370/119391/83667/57223/130589/10891/8790/89792/2524/1407/9962/2103/216/6513/7915/2683/1468/5166/5313/6097/388581	28
GO:0030072	peptide hormone secretion	25/1235	250/18670	0.0257229	0.175119	0.148491	91608/9971/353500/6717/776/55107/5798/9254/9699/114/387597/5978/3382/6865/1268/5991/6513/8425/8600/2852/4760/388581/2693/4825/389692	25
GO:0003230	cardiac atrium development	6/1235	35/18670	0.0257581	0.175119	0.148491	7042/4193/161882/23493/2702/55897	6
GO:0051954	positive regulation of amine transport	6/1235	35/18670	0.0257581	0.175119	0.148491	1815/552/5021/6865/5027/183	6
GO:0070423	nucleotide-binding oligomerization domain containing signaling pathway	6/1235	35/18670	0.0257581	0.175119	0.148491	1540/64127/23118/55765/5608/7128	6
GO:0097484	dendrite extension	6/1235	35/18670	0.0257581	0.175119	0.148491	23025/53335/51265/9699/26053/26999	6
GO:0098751	bone cell development	6/1235	35/18670	0.0257581	0.175119	0.148491	4211/55294/161882/5777/3815/8600	6
GO:0110111	negative regulation of animal organ morphogenesis	6/1235	35/18670	0.0257581	0.175119	0.148491	4982/7042/634/55679/55294/5076	6
GO:0001556	oocyte maturation	5/1235	26/18670	0.0257946	0.175119	0.148491	79670/9319/6790/1618/26271	5
GO:0010460	positive regulation of heart rate	5/1235	26/18670	0.0257946	0.175119	0.148491	552/55800/23493/4878/153	5
GO:0032967	positive regulation of collagen biosynthetic process	5/1235	26/18670	0.0257946	0.175119	0.148491	90993/7043/4602/3549/1490	5
GO:0043090	amino acid import	5/1235	26/18670	0.0257946	0.175119	0.148491	2055/6506/6507/6520/183	5
GO:0060074	synapse maturation	5/1235	26/18670	0.0257946	0.175119	0.148491	991/4747/84966/9378/5064	5
GO:1903203	regulation of oxidative stress-induced neuron death	5/1235	26/18670	0.0257946	0.175119	0.148491	7248/5978/55294/142/8013	5
GO:0099565	chemical synaptic transmission, postsynaptic	13/1235	108/18670	0.0259406	0.175899	0.149152	23316/2903/9162/134/1815/2904/4355/9699/9378/5024/784/23542/5027	13
GO:0070542	response to fatty acid	11/1235	86/18670	0.0260337	0.176319	0.149509	9971/7292/7049/338/9370/445/10891/7097/9076/5166/1490	11
GO:0051495	positive regulation of cytoskeleton organization	23/1235	226/18670	0.026331	0.17812	0.151035	54551/22843/22998/57482/7248/8829/4926/10615/9535/25886/9026/3383/29899/7043/8851/55604/6683/50507/5027/123720/85459/10174/1490	23
GO:0006940	regulation of smooth muscle contraction	9/1235	65/18670	0.0266161	0.179619	0.152307	3778/134/8877/143872/5021/6865/3815/2852/2693	9
GO:0034332	adherens junction organization	9/1235	65/18670	0.0266161	0.179619	0.152307	144100/5817/253559/1010/1008/55765/3728/81607/10266	9
GO:0010950	positive regulation of endopeptidase activity	19/1235	178/18670	0.0266779	0.179822	0.152479	23411/8301/91662/58484/2903/2904/7023/9026/5978/26999/9966/2152/23787/666/8743/2852/8795/1490/10017	19
GO:0045637	regulation of myeloid cell differentiation	25/1235	251/18670	0.0268431	0.18072	0.15324	4352/4254/58508/1435/7704/3674/9757/634/4211/9370/7098/1387/26523/55294/8357/56998/146433/5588/161882/8013/8600/653604/8361/8365/8362	25
GO:0071496	cellular response to external stimulus	32/1235	339/18670	0.0271437	0.181684	0.154057	9971/83990/23411/93664/7248/167359/5587/81788/8061/7421/552/81929/53335/4193/7098/9750/1277/3383/83667/6506/5024/784/5292/1536/6548/5027/6513/9020/5166/183/8795/4878	32
GO:0002820	negative regulation of adaptive immune response	7/1235	45/18670	0.0272101	0.181684	0.154057	7292/634/64092/11126/53833/5777/30009	7
GO:0032570	response to progesterone	7/1235	45/18670	0.0272101	0.181684	0.154057	7042/8061/117144/7043/5021/7097/10266	7
GO:1900274	regulation of phospholipase C activity	7/1235	45/18670	0.0272101	0.181684	0.154057	552/9170/2099/395/7294/3815/183	7
GO:0070302	regulation of stress-activated protein kinase signaling cascade	24/1235	239/18670	0.0272155	0.181684	0.154057	1540/2081/142679/7042/9043/8877/7098/10371/64127/51339/5187/7855/23542/5470/28996/285613/55765/55872/7164/8600/60401/9618/653361/1490	24
GO:0016233	telomere capping	8/1235	55/18670	0.0273076	0.181684	0.154057	4361/5588/8550/4751/9212/8361/8365/8362	8
GO:0032613	interleukin-10 production	8/1235	55/18670	0.0273076	0.181684	0.154057	7292/29126/64127/55765/7097/53833/947/9308	8
GO:0098900	regulation of action potential	8/1235	55/18670	0.0273076	0.181684	0.154057	6331/784/7871/1268/6548/3728/2702/2859	8
GO:0097193	intrinsic apoptotic signaling pathway	28/1235	289/18670	0.0276035	0.181684	0.154057	1540/2081/23411/6498/64782/8531/4193/5423/90993/26471/11200/8626/55294/28996/9833/1191/54700/79915/7161/142/219790/666/60401/1870/8795/50484/23645/10017	28
GO:1901861	regulation of muscle tissue development	17/1235	155/18670	0.0276337	0.181684	0.154057	1063/2065/7049/7093/8531/4211/9734/55553/2735/2817/10891/5292/7161/3720/23493/6899/221476	17
GO:0003414	chondrocyte morphogenesis involved in endochondral bone morphogenesis	4/1235	18/18670	0.0276403	0.181684	0.154057	1293/1292/51435/1291	4
GO:0003429	growth plate cartilage chondrocyte morphogenesis	4/1235	18/18670	0.0276403	0.181684	0.154057	1293/1292/51435/1291	4
GO:0007194	negative regulation of adenylate cyclase activity	4/1235	18/18670	0.0276403	0.181684	0.154057	84059/8811/2912/5064	4
GO:0007250	activation of NF-kappaB-inducing kinase activity	4/1235	18/18670	0.0276403	0.181684	0.154057	7098/9966/9618/8795	4
GO:0008090	retrograde axonal transport	4/1235	18/18670	0.0276403	0.181684	0.154057	4130/4747/3798/547	4
GO:0046459	short-chain fatty acid metabolic process	4/1235	18/18670	0.0276403	0.181684	0.154057	116285/84532/7915/122970	4
GO:0048557	embryonic digestive tract morphogenesis	4/1235	18/18670	0.0276403	0.181684	0.154057	6664/2255/3142/3549	4
GO:0090171	chondrocyte morphogenesis	4/1235	18/18670	0.0276403	0.181684	0.154057	1293/1292/51435/1291	4
GO:0097094	craniofacial suture morphogenesis	4/1235	18/18670	0.0276403	0.181684	0.154057	158326/1112/7043/4488	4
GO:2000193	positive regulation of fatty acid transport	4/1235	18/18670	0.0276403	0.181684	0.154057	5608/5027/8399/8600	4
GO:0006855	drug transmembrane transport	10/1235	76/18670	0.0276601	0.181684	0.154057	83733/253512/64849/246213/2055/6506/6507/6580/1468/183	10
GO:0035051	cardiocyte differentiation	18/1235	167/18670	0.0279276	0.183228	0.155367	4703/7248/7049/7042/8470/10512/55553/5978/5308/50507/8320/6548/23493/183/2852/221476/55897/4878	18
GO:0051099	positive regulation of binding	19/1235	179/18670	0.0280676	0.183274	0.155406	3925/90780/6708/8829/4140/285381/9026/9750/1193/2959/51339/23228/28996/142/9618/348/4242/340061/4760	19
GO:0001824	blastocyst development	12/1235	98/18670	0.0280721	0.183274	0.155406	57677/6498/9318/6830/705/84660/8320/201895/1045/26469/4751/4242	12
GO:0048477	oogenesis	11/1235	87/18670	0.0280878	0.183274	0.155406	9665/9757/54852/2661/79670/3549/9319/6790/284071/1618/26271	11
GO:0043280	positive regulation of cysteine-type endopeptidase activity involved in apoptotic process	15/1235	132/18670	0.0280964	0.183274	0.155406	23411/91662/58484/7023/9026/5978/9966/2152/23787/666/8743/2852/8795/1490/10017	15
GO:0045598	regulation of fat cell differentiation	15/1235	132/18670	0.0280964	0.183274	0.155406	23411/7704/1240/9370/166379/862/2487/25937/63976/161882/51320/4488/6097/4320/2852	15
GO:0060271	cilium assembly	34/1235	366/18670	0.0286206	0.186478	0.158123	1540/123872/9696/9480/56171/3983/5347/3911/22897/23224/1951/25886/55764/199221/85462/29887/154865/138639/6103/85452/54768/25937/54820/136332/5991/10938/30845/10677/54930/4751/3797/129880/50487/352909	34
GO:0071322	cellular response to carbohydrate stimulus	16/1235	144/18670	0.0287481	0.187094	0.158645	9971/2081/6717/7054/55107/5798/114/3383/10891/5608/50507/5076/6518/2852/4760/388581	16
GO:0015800	acidic amino acid transport	9/1235	66/18670	0.0290768	0.187472	0.158966	83733/134/552/246213/2055/6506/2912/6507/5027	9
GO:0051926	negative regulation of calcium ion transport	9/1235	66/18670	0.0290768	0.187472	0.158966	6717/1815/5311/1193/3383/784/10681/6236/2859	9
GO:1901880	negative regulation of protein depolymerization	9/1235	66/18670	0.0290768	0.187472	0.158966	6708/57482/6710/26586/55604/7111/157922/10677/50853	9
GO:1901990	regulation of mitotic cell cycle phase transition	40/1235	444/18670	0.0291518	0.187472	0.158966	991/1063/701/5347/5708/9928/22897/7023/4193/8318/5311/1112/4361/51339/11200/993/11065/995/144455/54820/7465/79915/23476/2255/51514/10403/54443/51512/894/9700/5777/10106/84861/9319/54930/4751/6790/9212/26271/4303	40
GO:0048634	regulation of muscle organ development	17/1235	156/18670	0.0291775	0.187472	0.158966	1063/2065/7049/7093/8531/4211/9734/55553/2735/2817/51460/5292/7161/3720/23493/6899/221476	17
GO:0003417	growth plate cartilage development	6/1235	36/18670	0.0292366	0.187472	0.158966	4322/1293/1292/25886/51435/1291	6
GO:0006699	bile acid biosynthetic process	6/1235	36/18670	0.0292366	0.187472	0.158966	9971/23411/114880/570/80270/1593	6
GO:0010742	macrophage derived foam cell differentiation	6/1235	36/18670	0.0292366	0.187472	0.158966	1435/338/9370/19/8399/183	6
GO:0035872	nucleotide-binding domain, leucine rich repeat containing receptor signaling pathway	6/1235	36/18670	0.0292366	0.187472	0.158966	1540/64127/23118/55765/5608/7128	6
GO:0071392	cellular response to estradiol stimulus	6/1235	36/18670	0.0292366	0.187472	0.158966	8204/10891/2099/84660/4488/2852	6
GO:0090077	foam cell differentiation	6/1235	36/18670	0.0292366	0.187472	0.158966	1435/338/9370/19/8399/183	6
GO:2000310	regulation of NMDA receptor activity	6/1235	36/18670	0.0292366	0.187472	0.158966	2903/4747/2904/1741/23542/10891	6
GO:2000516	positive regulation of CD4-positive, alpha-beta T cell activation	6/1235	36/18670	0.0292366	0.187472	0.158966	7292/4602/11126/5588/3142/9308	6
GO:0007156	homophilic cell adhesion via plasma membrane adhesion molecules	18/1235	168/18670	0.0294214	0.188444	0.159789	6900/2195/1952/634/5817/1951/6092/2196/57526/1010/84966/5979/53841/57453/54549/1008/27253/81607	18
GO:0031023	microtubule organizing center organization	15/1235	133/18670	0.0298077	0.189693	0.160849	9696/64793/5347/23224/25886/5311/84552/56890/23177/54820/159989/85459/54930/4751/6790	15
GO:1901224	positive regulation of NIK/NF-kappaB signaling	10/1235	77/18670	0.0299758	0.189693	0.160849	91662/8877/7098/64127/26523/9966/7097/219790/9618/8795	10
GO:0010714	positive regulation of collagen metabolic process	5/1235	27/18670	0.029985	0.189693	0.160849	90993/7043/4602/3549/1490	5
GO:0010971	positive regulation of G2/M transition of mitotic cell cycle	5/1235	27/18670	0.029985	0.189693	0.160849	993/995/23476/51514/26271	5
GO:0032673	regulation of interleukin-4 production	5/1235	27/18670	0.029985	0.189693	0.160849	7292/5588/161882/53833/9308	5
GO:0036475	neuron death in response to oxidative stress	5/1235	27/18670	0.029985	0.189693	0.160849	7248/5978/55294/142/8013	5
GO:0051569	regulation of histone H3-K4 methylation	5/1235	27/18670	0.029985	0.189693	0.160849	90780/9757/1789/26053/4602	5
GO:0061437	renal system vasculature development	5/1235	27/18670	0.029985	0.189693	0.160849	8829/4854/5311/285/947	5
GO:0061440	kidney vasculature development	5/1235	27/18670	0.029985	0.189693	0.160849	8829/4854/5311/285/947	5
GO:0072207	metanephric epithelium development	5/1235	27/18670	0.029985	0.189693	0.160849	9370/5311/25937/38/5076	5
GO:0098810	neurotransmitter reuptake	5/1235	27/18670	0.029985	0.189693	0.160849	6571/1815/2055/6506/6532	5
GO:0060113	inner ear receptor cell differentiation	8/1235	56/18670	0.0300791	0.190076	0.161174	4647/2535/84059/9750/25861/55283/23493/5459	8
GO:0009791	post-embryonic development	11/1235	88/18670	0.0302559	0.190574	0.161596	6571/90780/4647/338/10512/639/55553/7855/2016/60529/7915	11
GO:0034103	regulation of tissue remodeling	11/1235	88/18670	0.0302559	0.190574	0.161596	4982/7421/634/1436/64114/5027/8600/5166/183/7128/338773	11
GO:0010883	regulation of lipid storage	7/1235	46/18670	0.0303262	0.190574	0.161596	23411/338/32/19/55294/8399/10938	7
GO:0031648	protein destabilization	7/1235	46/18670	0.0303262	0.190574	0.161596	23411/5347/440193/27042/4193/1387/55294	7
GO:0048599	oocyte development	7/1235	46/18670	0.0303262	0.190574	0.161596	2661/79670/9319/6790/284071/1618/26271	7
GO:0000077	DNA damage checkpoint	16/1235	145/18670	0.0304084	0.190667	0.161675	83990/5347/51322/4193/1112/65975/4361/11200/995/144455/1407/51514/51512/84142/6790/4303	16
GO:0002822	regulation of adaptive immune response based on somatic recombination of immune receptors built from immunoglobulin superfamily domains	16/1235	145/18670	0.0304084	0.190667	0.161675	7292/6830/634/5817/29126/3263/7855/8417/79915/5588/5027/53833/3142/5777/30009/7128	16
GO:0002703	regulation of leukocyte mediated immunity	21/1235	205/18670	0.0307183	0.192397	0.163142	7292/6830/634/5817/7098/64127/3383/3263/7855/8417/11126/79915/5027/53833/9188/5777/30009/154064/11314/80329/4878	21
GO:0099504	synaptic vesicle cycle	20/1235	193/18670	0.0309167	0.193426	0.164014	6571/8301/93664/23025/776/9162/7054/440279/246213/9699/9378/783/8851/8618/4983/27253/1268/5027/339302/8676	20
GO:0002285	lymphocyte activation involved in immune response	19/1235	181/18670	0.0310094	0.193792	0.164324	7292/7248/4063/6830/634/55619/7374/3383/23228/4602/9156/79915/8320/161882/3142/26022/30009/6097/4242	19
GO:0032956	regulation of actin cytoskeleton organization	32/1235	343/18670	0.0312872	0.194684	0.165081	57822/3925/6708/54551/22843/4703/22998/57482/7248/8829/6710/9535/9026/1436/3383/55616/7043/8851/7226/79822/55604/7111/395/50507/286527/6548/123720/10677/50853/10174/1490/11013	32
GO:0015807	L-amino acid transport	9/1235	67/18670	0.0316924	0.194684	0.165081	83733/11136/246213/2055/6506/6507/6520/54716/183	9
GO:0019722	calcium-mediated signaling	22/1235	218/18670	0.0318191	0.194684	0.165081	2065/6717/2903/2904/552/1240/8877/5311/1193/57338/5024/7226/29995/2516/79772/6548/5027/481/9454/8600/7462/933	22
GO:0002730	regulation of dendritic cell cytokine production	3/1235	11/18670	0.0319086	0.194684	0.165081	7098/64127/9188	3
GO:0002836	positive regulation of response to tumor cell	3/1235	11/18670	0.0319086	0.194684	0.165081	5817/29126/11126	3
GO:0002839	positive regulation of immune response to tumor cell	3/1235	11/18670	0.0319086	0.194684	0.165081	5817/29126/11126	3
GO:0003174	mitral valve development	3/1235	11/18670	0.0319086	0.194684	0.165081	4091/161882/2702	3
GO:0003356	regulation of cilium beat frequency	3/1235	11/18670	0.0319086	0.194684	0.165081	123872/117144/126731	3
GO:0019852	L-ascorbic acid metabolic process	3/1235	11/18670	0.0319086	0.194684	0.165081	119391/9962/6513	3
GO:0021604	cranial nerve structural organization	3/1235	11/18670	0.0319086	0.194684	0.165081	8829/10371/5076	3
GO:0031915	positive regulation of synaptic plasticity	3/1235	11/18670	0.0319086	0.194684	0.165081	991/23025/114	3
GO:0032494	response to peptidoglycan	3/1235	11/18670	0.0319086	0.194684	0.165081	11213/64127/55765	3
GO:0042271	susceptibility to natural killer cell mediated cytotoxicity	3/1235	11/18670	0.0319086	0.194684	0.165081	5817/154064/80329	3
GO:0045835	negative regulation of meiotic nuclear division	3/1235	11/18670	0.0319086	0.194684	0.165081	286151/9319/26271	3
GO:0046501	protoporphyrinogen IX metabolic process	3/1235	11/18670	0.0319086	0.194684	0.165081	5498/1371/27102	3
GO:0051574	positive regulation of histone H3-K9 methylation	3/1235	11/18670	0.0319086	0.194684	0.165081	23411/4602/3720	3
GO:0060088	auditory receptor cell stereocilium organization	3/1235	11/18670	0.0319086	0.194684	0.165081	4647/9750/25861	3
GO:0060174	limb bud formation	3/1235	11/18670	0.0319086	0.194684	0.165081	6664/10512/2255	3
GO:0060315	negative regulation of ryanodine-sensitive calcium-release channel activity	3/1235	11/18670	0.0319086	0.194684	0.165081	6717/5311/1193	3
GO:0060947	cardiac vascular smooth muscle cell differentiation	3/1235	11/18670	0.0319086	0.194684	0.165081	23493/2852/55897	3
GO:0070278	extracellular matrix constituent secretion	3/1235	11/18670	0.0319086	0.194684	0.165081	90993/183/1490	3
GO:0090193	positive regulation of glomerulus development	3/1235	11/18670	0.0319086	0.194684	0.165081	9370/5979/5076	3
GO:0045834	positive regulation of lipid metabolic process	16/1235	146/18670	0.0321385	0.195875	0.166091	9971/5587/2046/134/552/116986/9370/64127/376497/10891/157506/8013/3815/183/348/2693	16
GO:0007215	glutamate receptor signaling pathway	12/1235	100/18670	0.0322234	0.195971	0.166172	23025/2903/4747/2904/1741/2894/8851/2912/23542/10891/2918/9454	12
GO:0060079	excitatory postsynaptic potential	12/1235	100/18670	0.0322234	0.195971	0.166172	23316/2903/9162/134/2904/4355/9699/9378/5024/784/23542/5027	12
GO:0043401	steroid hormone mediated signaling pathway	19/1235	182/18670	0.0325638	0.197828	0.167747	9971/23411/7421/9667/10002/5187/8204/8626/10891/167465/2099/2516/153222/1407/142/2103/8013/6097/2852	19
GO:0021587	cerebellum morphogenesis	6/1235	37/18670	0.0330098	0.199084	0.168812	9928/64211/2736/2735/25861/4983	6
GO:0030201	heparan sulfate proteoglycan metabolic process	6/1235	37/18670	0.0330098	0.199084	0.168812	9348/2817/6448/9951/9956/9394	6
GO:0045777	positive regulation of blood pressure	6/1235	37/18670	0.0330098	0.199084	0.168812	134/552/5021/1268/183/153	6
GO:0051567	histone H3-K9 methylation	6/1235	37/18670	0.0330098	0.199084	0.168812	23411/51742/1789/4602/63976/3720	6
GO:0045143	homologous chromosome segregation	8/1235	57/18670	0.0330378	0.199084	0.168812	83990/5347/4438/9232/4361/9700/9319/284071	8
GO:0003085	negative regulation of systemic arterial blood pressure	4/1235	19/18670	0.0332275	0.199084	0.168812	134/143872/4878/153	4
GO:0003422	growth plate cartilage morphogenesis	4/1235	19/18670	0.0332275	0.199084	0.168812	1293/1292/51435/1291	4
GO:0032303	regulation of icosanoid secretion	4/1235	19/18670	0.0332275	0.199084	0.168812	5608/5027/8399/8600	4
GO:0042908	xenobiotic transport	4/1235	19/18670	0.0332275	0.199084	0.168812	6533/9076/6513/5174	4
GO:0048486	parasympathetic nervous system development	4/1235	19/18670	0.0332275	0.199084	0.168812	8829/10371/7020/6899	4
GO:0060716	labyrinthine layer blood vessel development	4/1235	19/18670	0.0332275	0.199084	0.168812	22846/7855/9394/23493	4
GO:1905939	regulation of gonad development	4/1235	19/18670	0.0332275	0.199084	0.168812	10371/26471/2661/2516	4
GO:2000696	regulation of epithelial cell differentiation involved in kidney development	4/1235	19/18670	0.0332275	0.199084	0.168812	9370/25937/8842/5076	4
GO:0071331	cellular response to hexose stimulus	15/1235	135/18670	0.0334584	0.19987	0.169478	9971/2081/6717/7054/55107/5798/114/3383/10891/50507/5076/6518/2852/4760/388581	15
GO:0019318	hexose metabolic process	24/1235	244/18670	0.0336325	0.19987	0.169478	23411/9563/51363/8534/2819/2026/32/9370/83667/57223/130589/10891/8790/2524/1407/2103/216/7915/2683/1468/5166/5313/6097/388581	24
GO:0030073	insulin secretion	21/1235	207/18670	0.0336501	0.19987	0.169478	9971/353500/6717/776/55107/5798/9254/9699/114/387597/5978/3382/1268/5991/6513/2852/4760/388581/2693/4825/389692	21
GO:0008206	bile acid metabolic process	7/1235	47/18670	0.0336734	0.19987	0.169478	9971/23411/114880/570/80270/3815/1593	7
GO:0030261	chromosome condensation	7/1235	47/18670	0.0336734	0.19987	0.169478	23397/9918/26993/7153/64151/51203/2852	7
GO:0070169	positive regulation of biomineral tissue development	7/1235	47/18670	0.0336734	0.19987	0.169478	152816/84059/7043/7020/5027/338773/26271	7
GO:0098868	bone growth	7/1235	47/18670	0.0336734	0.19987	0.169478	4322/1293/1292/25886/4488/51435/1291	7
GO:0110151	positive regulation of biomineralization	7/1235	47/18670	0.0336734	0.19987	0.169478	152816/84059/7043/7020/5027/338773/26271	7
GO:0031109	microtubule polymerization or depolymerization	13/1235	112/18670	0.0336764	0.19987	0.169478	3925/4130/4926/220134/26586/8851/54820/6683/157922/11004/221150/126731/26271	13
GO:0019216	regulation of lipid metabolic process	37/1235	410/18670	0.0340568	0.201916	0.171213	9971/23411/5587/5244/2046/134/7421/552/8877/634/338/116986/32/9370/19/64127/1387/57223/338442/376497/10891/5978/55294/2516/51129/1268/157506/8013/8800/113791/3815/5166/6097/183/348/2852/2693	37
GO:0098840	protein transport along microtubule	9/1235	68/18670	0.0344669	0.202681	0.171862	4130/3798/55764/166379/6103/547/7275/199223/3797	9
GO:0099118	microtubule-based protein transport	9/1235	68/18670	0.0344669	0.202681	0.171862	4130/3798/55764/166379/6103/547/7275/199223/3797	9
GO:0001958	endochondral ossification	5/1235	28/18670	0.0345796	0.202681	0.171862	4322/4665/1277/8817/338773	5
GO:0006972	hyperosmotic response	5/1235	28/18670	0.0345796	0.202681	0.171862	8531/7098/6558/9076/6513	5
GO:0018146	keratan sulfate biosynthetic process	5/1235	28/18670	0.0345796	0.202681	0.171862	8534/176/2331/2683/10331	5
GO:0033598	mammary gland epithelial cell proliferation	5/1235	28/18670	0.0345796	0.202681	0.171862	90780/128239/2099/374/8600	5
GO:0036075	replacement ossification	5/1235	28/18670	0.0345796	0.202681	0.171862	4322/4665/1277/8817/338773	5
GO:0045745	positive regulation of G protein-coupled receptor signaling pathway	5/1235	28/18670	0.0345796	0.202681	0.171862	6900/2535/5653/112609/2852	5
GO:0045761	regulation of adenylate cyclase activity	5/1235	28/18670	0.0345796	0.202681	0.171862	776/84059/8811/2912/5064	5
GO:0060260	regulation of transcription initiation from RNA polymerase II promoter	5/1235	28/18670	0.0345796	0.202681	0.171862	2959/2099/56998/23493/1810	5
GO:2000108	positive regulation of leukocyte apoptotic process	5/1235	28/18670	0.0345796	0.202681	0.171862	23411/29126/338442/5027/8013	5
GO:0001656	metanephros development	11/1235	90/18670	0.0349453	0.204401	0.17332	6092/9370/5311/5979/25937/55083/38/2255/157506/5076/947	11
GO:0001843	neural tube closure	11/1235	90/18670	0.0349453	0.204401	0.17332	57822/7248/7042/2535/55764/6692/4524/5076/10653/8463/8543	11
GO:0021675	nerve development	10/1235	79/18670	0.0350118	0.204579	0.173471	2065/23025/8829/10371/5979/7020/6507/5076/6899/5459	10
GO:0071326	cellular response to monosaccharide stimulus	15/1235	136/18670	0.0354011	0.20664	0.175219	9971/2081/6717/7054/55107/5798/114/3383/10891/50507/5076/6518/2852/4760/388581	15
GO:0042445	hormone metabolic process	23/1235	233/18670	0.0356777	0.20804	0.176406	7421/3294/5653/79154/1359/6716/53905/10891/5978/51301/2099/7038/2516/1592/3290/64577/157506/220/216/25825/1593/7276/1381	23
GO:0008643	carbohydrate transport	16/1235	148/18670	0.0358136	0.208584	0.176868	8218/148808/7248/9370/51151/83667/6506/56606/673/7525/9962/125206/8013/6518/6513/388581	16
GO:0046620	regulation of organ growth	13/1235	113/18670	0.0358447	0.208584	0.176868	7049/8531/4211/32/9254/2735/6532/5292/7161/3720/23493/3142/221476	13
GO:0042093	T-helper cell differentiation	8/1235	58/18670	0.0361883	0.210152	0.178197	7292/4063/4602/161882/3142/26022/30009/6097	8
GO:0055081	anion homeostasis	8/1235	58/18670	0.0361883	0.210152	0.178197	9971/23411/134/19/6558/2912/10568/348	8
GO:0001823	mesonephros development	12/1235	102/18670	0.0367966	0.212654	0.180319	3911/7704/6092/5311/5979/55083/56998/2255/4091/5076/4072/183	12
GO:0035335	peptidyl-tyrosine dephosphorylation	12/1235	102/18670	0.0367966	0.212654	0.180319	142679/1844/5798/138639/5794/993/995/9108/80824/5777/26469/93650	12
GO:0030326	embryonic limb morphogenesis	14/1235	125/18670	0.036807	0.212654	0.180319	7042/7704/55764/2736/1387/9496/8626/7020/4621/157506/2702/60529/3549/4488	14
GO:0032368	regulation of lipid transport	14/1235	125/18670	0.036807	0.212654	0.180319	23411/5244/64241/9370/19/2661/4602/5608/1407/5027/8399/8600/183/348	14
GO:0035113	embryonic appendage morphogenesis	14/1235	125/18670	0.036807	0.212654	0.180319	7042/7704/55764/2736/1387/9496/8626/7020/4621/157506/2702/60529/3549/4488	14
GO:0032620	interleukin-17 production	6/1235	38/18670	0.0370847	0.213388	0.180941	9971/7292/4063/8877/64127/5588	6
GO:0046636	negative regulation of alpha-beta T cell activation	6/1235	38/18670	0.0370847	0.213388	0.180941	7292/29126/3142/30009/3549/11314	6
GO:1901021	positive regulation of calcium ion transmembrane transporter activity	6/1235	38/18670	0.0370847	0.213388	0.180941	5311/783/784/6548/481/30845	6
GO:1902742	apoptotic process involved in development	6/1235	38/18670	0.0370847	0.213388	0.180941	7042/7421/6092/7855/55113/5076	6
GO:0008089	anterograde axonal transport	7/1235	48/18670	0.0372574	0.213568	0.181094	4130/24137/4747/3798/547/6683/23011	7
GO:0046850	regulation of bone remodeling	7/1235	48/18670	0.0372574	0.213568	0.181094	4982/1436/5027/8600/5166/7128/338773	7
GO:0060324	face development	7/1235	48/18670	0.0372574	0.213568	0.181094	83690/1277/7043/4313/4621/220/6899	7
GO:0022412	cellular process involved in reproduction in multicellular organism	33/1235	361/18670	0.037267	0.213568	0.181094	83990/23397/90780/5347/8061/7704/57082/9665/9757/1788/6092/27125/6595/54852/639/91181/245711/54456/2661/7153/285/79670/3549/3815/9319/6790/284071/50487/1618/338773/29947/26271/2352	33
GO:0030166	proteoglycan biosynthetic process	9/1235	69/18670	0.0374041	0.213878	0.181357	10090/51363/1463/9348/89792/9951/176/9956/9394	9
GO:0001578	microtubule bundle formation	11/1235	91/18670	0.0374721	0.213878	0.181357	123872/56171/5347/4926/85452/54768/6683/136332/8086/50487/352909	11
GO:0046364	monosaccharide biosynthetic process	11/1235	91/18670	0.0374721	0.213878	0.181357	23411/51363/2819/2026/9370/83667/57223/10891/1407/1468/388581	11
GO:1901992	positive regulation of mitotic cell cycle phase transition	11/1235	91/18670	0.0374721	0.213878	0.181357	4193/8318/993/11065/995/23476/2255/51514/894/9700/26271	11
GO:0046328	regulation of JNK cascade	19/1235	185/18670	0.0375741	0.214245	0.181667	1540/2081/142679/9043/7098/10371/64127/51339/5187/7855/23542/5470/28996/7164/8600/60401/9618/653361/1490	19
GO:0007163	establishment or maintenance of cell polarity	21/1235	210/18670	0.0384321	0.218916	0.185628	2195/5347/10090/4926/3993/9750/1741/84552/29899/4983/55083/54820/7465/2255/6548/11004/10403/163183/1045/4752/10653	21
GO:0018958	phenol-containing compound metabolic process	12/1235	103/18670	0.0392473	0.220608	0.187063	2903/9627/7042/7054/1815/51151/1571/53905/51301/7038/26002/314	12
GO:1905269	positive regulation of chromatin organization	12/1235	103/18670	0.0392473	0.220608	0.187063	23411/5587/9733/1789/26053/56254/26993/10891/4602/5081/23476/3720	12
GO:0001502	cartilage condensation	4/1235	20/18670	0.0394244	0.220608	0.187063	1301/8538/176/1490	4
GO:0007620	copulation	4/1235	20/18670	0.0394244	0.220608	0.187063	552/6532/5021/1268	4
GO:0019370	leukotriene biosynthetic process	4/1235	20/18670	0.0394244	0.220608	0.187063	4258/4048/2687/2678	4
GO:0031280	negative regulation of cyclase activity	4/1235	20/18670	0.0394244	0.220608	0.187063	84059/8811/2912/5064	4
GO:0043369	CD4-positive or CD8-positive, alpha-beta T cell lineage commitment	4/1235	20/18670	0.0394244	0.220608	0.187063	1540/4063/161882/30009	4
GO:0043586	tongue development	4/1235	20/18670	0.0394244	0.220608	0.187063	63976/80326/6899/3815	4
GO:0050860	negative regulation of T cell receptor signaling pathway	4/1235	20/18670	0.0394244	0.220608	0.187063	634/11126/5777/7070	4
GO:0060008	Sertoli cell differentiation	4/1235	20/18670	0.0394244	0.220608	0.187063	51742/9667/3383/91181	4
GO:0060602	branch elongation of an epithelium	4/1235	20/18670	0.0394244	0.220608	0.187063	2099/2255/157506/374	4
GO:0070932	histone H3 deacetylation	4/1235	20/18670	0.0394244	0.220608	0.187063	23411/9734/5187/79885	4
GO:0071397	cellular response to cholesterol	4/1235	20/18670	0.0394244	0.220608	0.187063	57476/54762/19/57655	4
GO:0072234	metanephric nephron tubule development	4/1235	20/18670	0.0394244	0.220608	0.187063	5311/25937/38/5076	4
GO:0097755	positive regulation of blood vessel diameter	8/1235	59/18670	0.0395351	0.220608	0.187063	3778/134/143872/2702/183/348/2852/153	8
GO:0065004	protein-DNA complex assembly	24/1235	248/18670	0.0395365	0.220608	0.187063	2965/8349/1063/23126/9733/51773/57082/8318/64061/2959/4175/2099/5888/54700/8357/144108/7290/142/23493/1810/653604/8361/8365/8362	24
GO:0000083	regulation of transcription involved in G1/S transition of mitotic cell cycle	5/1235	29/18670	0.0395863	0.220608	0.187063	8318/144455/23476/2103/26271	5
GO:0007263	nitric oxide mediated signal transduction	5/1235	29/18670	0.0395863	0.220608	0.187063	2983/183/348/4760/389692	5
GO:0021602	cranial nerve morphogenesis	5/1235	29/18670	0.0395863	0.220608	0.187063	8829/10371/7020/5076/6899	5
GO:0048730	epidermis morphogenesis	5/1235	29/18670	0.0395863	0.220608	0.187063	7042/84283/8626/80326/2255	5
GO:0050855	regulation of B cell receptor signaling pathway	5/1235	29/18670	0.0395863	0.220608	0.187063	23228/9404/11314/933/257144	5
GO:0050974	detection of mechanical stimulus involved in sensory perception	5/1235	29/18670	0.0395863	0.220608	0.187063	1301/84059/784/25861/3815	5
GO:0032612	interleukin-1 production	13/1235	115/18670	0.0404767	0.221123	0.1875	9971/91662/58484/8877/634/19/64127/7855/55765/5027/24145/7128/2693	13
GO:0032963	collagen metabolic process	13/1235	115/18670	0.0404767	0.221123	0.1875	4322/5653/1277/90993/7043/4313/9509/4602/5027/79148/3549/4320/1490	13
GO:0007320	insemination	3/1235	12/18670	0.0404989	0.221123	0.1875	552/6532/5021	3
GO:0016045	detection of bacterium	3/1235	12/18670	0.0404989	0.221123	0.1875	58484/64127/7097	3
GO:0016188	synaptic vesicle maturation	3/1235	12/18670	0.0404989	0.221123	0.1875	8301/23025/440279	3
GO:0021559	trigeminal nerve development	3/1235	12/18670	0.0404989	0.221123	0.1875	8829/10371/7020	3
GO:0036005	response to macrophage colony-stimulating factor	3/1235	12/18670	0.0404989	0.221123	0.1875	1435/1436/7097	3
GO:0036006	cellular response to macrophage colony-stimulating factor stimulus	3/1235	12/18670	0.0404989	0.221123	0.1875	1435/1436/7097	3
GO:0045722	positive regulation of gluconeogenesis	3/1235	12/18670	0.0404989	0.221123	0.1875	23411/57223/10891	3
GO:0051798	positive regulation of hair follicle development	3/1235	12/18670	0.0404989	0.221123	0.1875	7042/4926/4488	3
GO:0060019	radial glial cell differentiation	3/1235	12/18670	0.0404989	0.221123	0.1875	80045/2255/2016	3
GO:0060453	regulation of gastric acid secretion	3/1235	12/18670	0.0404989	0.221123	0.1875	9026/5733/5021	3
GO:0060707	trophoblast giant cell differentiation	3/1235	12/18670	0.0404989	0.221123	0.1875	639/144455/4188	3
GO:0071257	cellular response to electrical stimulus	3/1235	12/18670	0.0404989	0.221123	0.1875	5978/6548/5064	3
GO:0071888	macrophage apoptotic process	3/1235	12/18670	0.0404989	0.221123	0.1875	23411/64127/2693	3
GO:0099550	trans-synaptic signaling, modulating synaptic transmission	3/1235	12/18670	0.0404989	0.221123	0.1875	2983/1949/1268	3
GO:1901387	positive regulation of voltage-gated calcium channel activity	3/1235	12/18670	0.0404989	0.221123	0.1875	783/784/30845	3
GO:1902287	semaphorin-plexin signaling pathway involved in axon guidance	3/1235	12/18670	0.0404989	0.221123	0.1875	10154/8829/10371	3
GO:1902337	regulation of apoptotic process involved in morphogenesis	3/1235	12/18670	0.0404989	0.221123	0.1875	7042/7421/5076	3
GO:1904424	regulation of GTP binding	3/1235	12/18670	0.0404989	0.221123	0.1875	3925/9750/79822	3
GO:2001053	regulation of mesenchymal cell apoptotic process	3/1235	12/18670	0.0404989	0.221123	0.1875	5076/6899/4488	3
GO:0030512	negative regulation of transforming growth factor beta receptor signaling pathway	10/1235	81/18670	0.0406084	0.221294	0.187645	9480/23411/6498/7049/4052/7043/63976/375387/4091/23592	10
GO:0048041	focal adhesion assembly	10/1235	81/18670	0.0406084	0.221294	0.187645	3911/22998/7248/8829/395/10420/6548/123720/8394/7070	10
GO:0045930	negative regulation of mitotic cell cycle	31/1235	338/18670	0.0408867	0.222597	0.188749	991/1063/701/5347/5708/90806/4193/5311/9232/1112/1620/65975/4361/51339/11200/10950/995/144455/7465/7153/10403/51512/10106/84861/9319/51696/6790/284071/9212/26271/4303	31
GO:0071103	DNA conformation change	33/1235	364/18670	0.0410833	0.223452	0.189475	2965/8349/83990/23397/23411/9733/51773/57082/7156/9918/1788/8318/64061/10973/6832/4361/26993/4175/5888/7153/8357/64151/144108/7290/142/79829/51203/2852/79075/653604/8361/8365/8362	33
GO:0099111	microtubule-based transport	19/1235	187/18670	0.0412144	0.22395	0.189897	123872/55811/4130/24137/4747/23224/3798/55764/166379/6103/547/7275/199223/54820/6683/5991/23011/9493/3797	19
GO:0042417	dopamine metabolic process	6/1235	39/18670	0.0414676	0.224464	0.190333	2903/9627/7042/7054/1815/26002	6
GO:0043114	regulation of vascular permeability	6/1235	39/18670	0.0414676	0.224464	0.190333	634/7525/6865/56998/10266/348	6
GO:0050856	regulation of T cell receptor signaling pathway	6/1235	39/18670	0.0414676	0.224464	0.190333	1540/634/11126/5777/11314/7070	6
GO:0060306	regulation of membrane repolarization	6/1235	39/18670	0.0414676	0.224464	0.190333	776/6331/784/2702/6330/4878	6
GO:0046928	regulation of neurotransmitter secretion	12/1235	104/18670	0.0418102	0.225561	0.191263	23025/776/9627/9162/9699/27345/783/79772/6865/1268/339302/2852	12
GO:0090100	positive regulation of transmembrane receptor protein serine/threonine kinase signaling pathway	12/1235	104/18670	0.0418102	0.225561	0.191263	353500/54778/7049/7042/4926/6664/1387/7043/2661/28996/142/4488	12
GO:0031214	biomineral tissue development	17/1235	163/18670	0.0418296	0.225561	0.191263	9923/7286/4322/152816/84059/29887/1277/54757/7043/7020/5027/23493/6899/4488/338773/26271/5744	17
GO:0110148	biomineralization	17/1235	163/18670	0.0418296	0.225561	0.191263	9923/7286/4322/152816/84059/29887/1277/54757/7043/7020/5027/23493/6899/4488/338773/26271/5744	17
GO:0003073	regulation of systemic arterial blood pressure	11/1235	93/18670	0.0429032	0.23091	0.195799	91608/134/552/1359/143872/5021/6518/2702/183/4878/153	11
GO:0032092	positive regulation of protein binding	11/1235	93/18670	0.0429032	0.23091	0.195799	6708/8829/4140/9026/51339/23228/28996/9618/348/4242/340061	11
GO:0002294	CD4-positive, alpha-beta T cell differentiation involved in immune response	8/1235	60/18670	0.043082	0.231433	0.196242	7292/4063/4602/161882/3142/26022/30009/6097	8
GO:0048635	negative regulation of muscle organ development	8/1235	60/18670	0.043082	0.231433	0.196242	7093/8531/4211/55553/51460/7161/3720/221476	8
GO:0030323	respiratory tube development	18/1235	176/18670	0.0435922	0.233414	0.197921	123872/3911/6664/2736/2735/7043/9496/55294/9509/3290/2255/23210/9394/8817/157506/51696/9618/1490	18
GO:0060401	cytosolic calcium ion transport	18/1235	176/18670	0.0435922	0.233414	0.197921	6717/2903/2904/5311/1193/57338/5024/784/7226/55013/55283/159371/5027/5777/79568/2852/7070/1490	18
GO:0006094	gluconeogenesis	10/1235	82/18670	0.0436243	0.233414	0.197921	23411/2819/2026/9370/83667/57223/10891/1407/1468/388581	10
GO:0071158	positive regulation of cell cycle arrest	10/1235	82/18670	0.0436243	0.233414	0.197921	4193/5311/8851/11200/995/144455/7161/51512/6790/4303	10
GO:0099003	vesicle-mediated transport in synapse	21/1235	213/18670	0.0436966	0.233414	0.197921	6571/8301/93664/23025/776/9162/7054/1815/440279/246213/9699/9378/783/8851/8618/4983/27253/1268/5027/339302/8676	21
GO:0051048	negative regulation of secretion	23/1235	238/18670	0.0437326	0.233414	0.197921	9971/353500/2065/91662/134/1815/634/285381/9370/9734/5733/5021/5978/6865/1407/1268/131450/947/11314/933/348/7128/2693	23
GO:0044786	cell cycle DNA replication	9/1235	71/18670	0.0437805	0.233414	0.197921	8318/4361/11200/4175/55294/144455/5888/79915/26271	9
GO:1904427	positive regulation of calcium ion transmembrane transport	9/1235	71/18670	0.0437805	0.233414	0.197921	6717/5311/783/784/6548/481/30845/2852/7070	9
GO:0035023	regulation of Rho protein signal transduction	15/1235	140/18670	0.043991	0.234095	0.198499	3925/8829/9828/23101/9750/19/143872/50649/84904/4983/389337/23229/348/65078/2859	15
GO:0072073	kidney epithelium development	15/1235	140/18670	0.043991	0.234095	0.198499	3911/6092/9370/5311/5979/25937/8842/55083/38/56998/4091/5076/947/4072/183	15
GO:0016202	regulation of striated muscle tissue development	16/1235	152/18670	0.044064	0.234263	0.198642	1063/2065/7049/7093/8531/4211/9734/55553/2735/2817/5292/7161/3720/23493/6899/221476	16
GO:0001841	neural tube formation	12/1235	105/18670	0.0444875	0.23585	0.199988	57822/7248/7042/2535/6664/55764/6692/4524/5076/10653/8463/8543	12
GO:0002821	positive regulation of adaptive immune response	12/1235	105/18670	0.0444875	0.23585	0.199988	23411/7292/5817/29126/3263/7855/8417/79915/5588/5027/3142/30009	12
GO:0055017	cardiac muscle tissue growth	12/1235	105/18670	0.0444875	0.23585	0.199988	7049/7042/4211/8470/2735/5292/7161/3720/23493/183/221476/4878	12
GO:0003209	cardiac atrium morphogenesis	5/1235	30/18670	0.0450108	0.237735	0.201585	7042/161882/23493/2702/55897	5
GO:0043171	peptide catabolic process	5/1235	30/18670	0.0450108	0.237735	0.201585	29953/10004/4048/2687/2678	5
GO:0046320	regulation of fatty acid oxidation	5/1235	30/18670	0.0450108	0.237735	0.201585	32/10891/1268/8013/5166	5
GO:0071549	cellular response to dexamethasone stimulus	5/1235	30/18670	0.0450108	0.237735	0.201585	7023/1789/445/3383/114907	5
GO:0002931	response to ischemia	7/1235	50/18670	0.0451556	0.238055	0.201857	1435/1436/10891/5978/5608/5027/24145	7
GO:0014009	glial cell proliferation	7/1235	50/18670	0.0451556	0.238055	0.201857	1435/6664/1436/4602/1191/146433/374	7
GO:2000116	regulation of cysteine-type endopeptidase activity	23/1235	239/18670	0.0454914	0.239602	0.203169	23411/91662/58484/2903/2904/7023/4193/9026/332/8626/5978/26999/5607/9966/2152/23787/5076/666/8743/2852/8795/1490/10017	23
GO:0001990	regulation of systemic arterial blood pressure by hormone	6/1235	40/18670	0.0461634	0.241267	0.204581	91608/552/1359/5021/2702/183	6
GO:0009187	cyclic nucleotide metabolic process	6/1235	40/18670	0.0461634	0.241267	0.204581	55811/5142/2983/114/4878/5744	6
GO:0072210	metanephric nephron development	6/1235	40/18670	0.0461634	0.241267	0.204581	9370/5311/5979/55083/5076/947	6
GO:0002438	acute inflammatory response to antigenic stimulus	4/1235	21/18670	0.0462337	0.241267	0.204581	462/3383/1268/53833	4
GO:0015874	norepinephrine transport	4/1235	21/18670	0.0462337	0.241267	0.204581	5021/6580/183/2693	4
GO:0017000	antibiotic biosynthetic process	4/1235	21/18670	0.0462337	0.241267	0.204581	255027/84532/53905/1536	4
GO:0048485	sympathetic nervous system development	4/1235	21/18670	0.0462337	0.241267	0.204581	8829/6664/10371/8626	4
GO:0051383	kinetochore organization	4/1235	21/18670	0.0462337	0.241267	0.204581	1063/23126/83540/10403	4
GO:0051412	response to corticosterone	4/1235	21/18670	0.0462337	0.241267	0.204581	4747/7054/8061/552	4
GO:0060713	labyrinthine layer morphogenesis	4/1235	21/18670	0.0462337	0.241267	0.204581	8521/6692/7855/10653	4
GO:0002791	regulation of peptide secretion	43/1235	500/18670	0.0467798	0.242604	0.205714	91608/9971/353500/91662/7292/6717/776/134/7042/1815/55107/23086/285381/9254/1436/9734/114/29126/64127/338442/7043/7855/5978/11126/7097/3382/1268/5991/5027/131450/6513/2702/947/8600/24145/933/348/2852/7128/4760/388581/2693/4825	43
GO:0006970	response to osmotic stress	10/1235	83/18670	0.0467887	0.242604	0.205714	3778/9221/7054/8531/5311/7098/6558/5243/9076/6513	10
GO:1903845	negative regulation of cellular response to transforming growth factor beta stimulus	10/1235	83/18670	0.0467887	0.242604	0.205714	9480/23411/6498/7049/4052/7043/63976/375387/4091/23592	10
GO:2000106	regulation of leukocyte apoptotic process	10/1235	83/18670	0.0467887	0.242604	0.205714	23411/4254/29126/64127/338442/5588/5027/8013/9212/2693	10
GO:0042490	mechanoreceptor differentiation	8/1235	61/18670	0.0468326	0.242604	0.205714	4647/2535/84059/9750/25861/55283/23493/5459	8
GO:0050701	interleukin-1 secretion	8/1235	61/18670	0.0468326	0.242604	0.205714	91662/58484/19/64127/7855/5027/24145/7128	8
GO:0071384	cellular response to corticosteroid stimulus	8/1235	61/18670	0.0468326	0.242604	0.205714	7023/1789/445/3383/114907/5978/153222/2852	8
GO:2000514	regulation of CD4-positive, alpha-beta T cell activation	8/1235	61/18670	0.0468326	0.242604	0.205714	7292/29126/4602/11126/5588/3142/30009/9308	8
GO:0002286	T cell activation involved in immune response	12/1235	106/18670	0.0472811	0.244703	0.207495	7292/7248/4063/634/3383/4602/8320/161882/3142/26022/30009/6097	12
GO:0038127	ERBB signaling pathway	15/1235	142/18670	0.0487979	0.250944	0.212786	2065/134/634/9026/55294/8895/685/2549/374/7039/26469/183/2852/653361/93650	15
GO:0002702	positive regulation of production of molecular mediator of immune response	11/1235	95/18670	0.0488527	0.250944	0.212786	51704/7292/64127/3263/7855/11126/79915/8013/9188/30009/5225	11
GO:0044070	regulation of anion transport	11/1235	95/18670	0.0488527	0.250944	0.212786	5244/134/552/5243/5608/5027/8399/8600/183/348/5174	11
GO:0090092	regulation of transmembrane receptor protein serine/threonine kinase signaling pathway	23/1235	241/18670	0.0491624	0.250944	0.212786	9480/353500/23411/6498/54778/7049/7042/4926/6664/4052/1387/7043/25937/2661/28996/63976/375387/2255/142/4091/23592/8425/4488	23
GO:0030834	regulation of actin filament depolymerization	7/1235	51/18670	0.0494779	0.250944	0.212786	6708/57482/6710/55604/7111/10677/50853	7
GO:0048736	appendage development	18/1235	179/18670	0.0499991	0.250944	0.212786	7042/7704/6664/55764/10512/2736/1387/9496/8626/7020/5308/4621/2255/157506/2702/60529/3549/4488	18
GO:0060173	limb development	18/1235	179/18670	0.0499991	0.250944	0.212786	7042/7704/6664/55764/10512/2736/1387/9496/8626/7020/5308/4621/2255/157506/2702/60529/3549/4488	18
