# Supplementary material for: Whole-Transcriptome Sequencing Analyses of Nuclear Antixoxidant-1 in Endothelial Cells: Role in Inflammation and Atherosclerosis
Source: Cells. 2022 Sep 18;11(18):2919. doi: 10.3390/cells11182919 (PMC9496719; doi:10.3390/cells11182919)
Supplement: Supplementary file 1 [file cells-11-02919-s001.zip › Supplementary Table S4 - Atox1_GO_CC pathway.xlsx]

## Sheet: Atox1_GO_CC
Supplementary Table S4. Related to Supp. Fig. S1B. Gene Oncology (Cellular componenets) analysis of genes listed in Supplementary Tables S1 and S2
ID	Description	GeneRatio	BgRatio	pvalue	p.adjust	qvalue	geneID	Count
GO:0016324	apical plasma membrane	49/1304	318/19717	2.58e-08	1.6e-05	1.44e-05	2195/55811/2065/4640/11136/5172/5244/3778/10004/55107/4647/634/64241/389015/9026/8470/9750/114/140803/84552/29881/6558/5243/53841/784/363/53905/5794/5021/6476/200958/56606/8842/11178/10568/50507/9962/6548/9076/6518/6513/481/947/6520/4072/54716/222962/7070/5174	49
GO:0045177	apical part of cell	53/1304	384/19717	2.85e-07	8.82e-05	7.94e-05	2195/55811/2065/4640/11136/5172/5244/3778/10004/55107/4647/634/64241/389015/9026/8470/9750/29887/22846/114/54566/140803/84552/29881/6558/5243/53841/784/363/53905/5794/5021/6476/200958/56606/8842/705/11178/10568/50507/9962/6548/9076/6518/6513/481/947/6520/4072/54716/222962/7070/5174	53
GO:0062023	collagen-containing extracellular matrix	51/1304	406/19717	7.69e-06	0.00158757	0.00142815	8722/64094/462/50509/54507/3911/56999/50939/3918/158326/1301/7042/653145/7007/2/4052/389084/1293/11096/1292/9370/161198/9423/1359/1277/3383/3263/170689/7450/59277/2817/7043/4313/3697/285613/9509/1191/2255/2152/176/79148/3068/2331/8425/51435/183/348/3959/1490/4878/1291	51
GO:0042734	presynaptic membrane	26/1304	161/19717	2.03e-05	0.00311911	0.0028059	8301/93664/23025/2903/776/9627/9162/134/8061/440279/1949/133396/9699/114/84966/9378/6506/5024/6532/2912/1008/27253/2918/1268/8676/2852	26
GO:0005819	spindle	44/1304	347/19717	2.52e-05	0.00311911	0.0028059	1540/123872/8218/64793/991/1063/701/5347/83473/10274/24137/9928/4926/10615/84440/220134/25886/5311/5423/56992/29899/26586/332/84541/5607/54820/6683/79866/4033/221150/85459/9700/8086/51203/9493/84861/54930/4751/9094/6790/126731/10460/9212/26271	44
GO:0016323	basolateral plasma membrane	31/1304	217/19717	4.15e-05	0.00428485	0.00385458	2065/4640/9635/134/634/389015/5311/10864/117247/114/1741/64127/65012/770/200958/200931/56606/6543/9962/9132/6548/9076/6513/481/947/5064/4072/7039/2683/6580/3761	31
GO:0043025	neuronal cell body	56/1304	497/19717	6.61e-05	0.00584105	0.00525451	6900/4352/55811/8301/4130/3770/56896/9627/22853/9162/79608/3782/134/7042/7054/8829/4926/2026/338/3798/5798/246213/9026/3751/114/1620/445/10439/1741/547/9378/5979/29850/5024/7043/8851/7226/1943/7855/23542/10891/345193/6507/25861/1536/3781/6543/5027/30009/6790/933/348/65078/653361/7070/4900	56
GO:0000779	condensed chromosome, centromeric region	20/1304	118/19717	8.91e-05	0.0068976	0.00620496	1063/701/5347/57082/10615/9918/81929/220134/151246/26039/332/54820/64151/11004/83540/221150/10403/4751/6790/9212	20
GO:0005876	spindle microtubule	13/1304	59/19717	0.000100936	0.00694219	0.00624508	5347/24137/4926/220134/5423/332/221150/85459/51203/84861/6790/126731/9212	13
GO:0000940	condensed chromosome outer kinetochore	6/1304	14/19717	0.000156509	0.00884983	0.00796116	1063/701/5347/220134/221150/10403	6
GO:0097060	synaptic membrane	49/1304	432/19717	0.000157267	0.00884983	0.00796116	6900/23345/8301/93664/23025/2903/776/9627/9162/3778/134/8829/8061/2904/440279/440073/1949/4355/375323/9026/133396/3751/9699/114/1741/84966/9378/2894/6506/5024/6532/2912/1008/11178/2557/27253/2918/1268/5913/2570/23229/8676/5064/9454/3761/2852/93650/4900/2693	49
GO:0009925	basal plasma membrane	9/1304	34/19717	0.000272792	0.0140715	0.0126585	2065/4640/9635/634/5311/200958/9962/9132/947	9
GO:0034703	cation channel complex	29/1304	220/19717	0.000299081	0.0142409	0.0128108	3786/5142/1258/8913/3770/2903/342372/776/3778/117144/2904/3742/6331/9254/5311/3751/1741/27345/783/55800/784/55013/1804/9132/6330/610/6329/59285/3761	29
GO:0000793	condensed chromosome	29/1304	223/19717	0.00037597	0.0166232	0.014954	150280/23397/1063/701/5347/10274/4438/57082/10615/9918/81929/220134/151246/26039/332/54820/5888/7153/23476/64151/11004/83540/221150/2103/10403/1045/4751/6790/9212	29
GO:0005667	transcription regulator complex	45/1304	415/19717	0.000754792	0.0311477	0.02802	2965/9971/90780/8521/4808/7704/7421/7023/4211/9734/5090/10973/2959/5451/55758/4005/10002/25937/5978/5308/28996/6873/2516/144455/63976/6913/83860/5991/142/8538/4091/161882/23493/8013/3068/4601/60529/1045/8463/5966/1810/1870/8543/4760/4990	45
GO:0005871	kinesin complex	11/1304	55/19717	0.00081718	0.0316146	0.02844	24137/9928/3798/547/56992/55083/54820/11004/9493/374654/3797	11
GO:0098793	presynapse	51/1304	491/19717	0.000931358	0.033549	0.0301801	6571/5142/8301/1258/6717/93664/23025/2903/776/2983/9627/9162/4747/134/7054/8061/440279/1949/3742/8877/5798/246213/133396/2055/9699/114/547/84966/9378/783/6506/5024/10681/6532/8851/2912/8618/1008/8417/4983/79772/27253/2918/3382/1268/5027/339302/8676/65078/2852/10882	51
GO:0000775	chromosome, centromeric region	25/1304	193/19717	0.000975576	0.033549	0.0301801	1063/4928/701/5347/10274/57082/10615/9918/81929/220134/1788/151246/26039/332/54820/64151/7290/11004/83540/221150/10403/4751/6790/79075/9212	25
GO:0005875	microtubule associated complex	21/1304	152/19717	0.00105852	0.0344853	0.0310224	56171/4130/55567/201625/24137/9928/1770/3798/547/144132/56992/332/55083/54820/11004/9493/374654/54930/6790/3797/9212	21
GO:0000780	condensed nuclear chromosome, centromeric region	7/1304	26/19717	0.00117419	0.0356552	0.0320748	701/5347/26039/83540/10403/6790/9212	7
GO:0031965	nuclear membrane	34/1304	296/19717	0.00120963	0.0356552	0.0320748	2081/23345/83990/23411/4928/114880/9635/23223/23588/23224/64782/57508/1844/286148/166336/204219/9378/5024/100101267/6683/83860/51514/3930/5027/161176/163183/894/8086/23592/146705/666/27346/148327/10017	34
GO:0000777	condensed chromosome kinetochore	16/1304	105/19717	0.00143416	0.0403521	0.0363001	1063/701/5347/57082/10615/81929/220134/151246/26039/332/54820/11004/83540/221150/10403/4751	16
GO:1902495	transmembrane transporter complex	36/1304	324/19717	0.0015942	0.0421489	0.0379164	3786/5142/1258/8913/3770/2903/342372/776/3778/117144/55107/2904/3742/64241/6331/9254/5311/3751/1741/1193/27345/783/55800/784/55013/1804/2557/9132/6548/2570/481/6330/610/6329/59285/3761	36
GO:0045178	basal part of cell	10/1304	51/19717	0.0016342	0.0421489	0.0379164	55811/2065/4640/9635/634/5311/200958/9962/9132/947	10
GO:0000794	condensed nuclear chromosome	15/1304	99/19717	0.00210993	0.0507879	0.0456879	150280/23397/701/5347/4438/9918/26039/5888/23476/83540/10403/1045/4751/6790/9212	15
GO:0072686	mitotic spindle	16/1304	109/19717	0.00213326	0.0507879	0.0456879	10274/4926/10615/220134/5311/29899/85459/9700/8086/51203/9493/84861/6790/126731/10460/9212	16
GO:0048786	presynaptic active zone	12/1304	71/19717	0.0022469	0.0515122	0.0463395	23025/776/2983/9162/134/440279/9699/114/9378/1008/8676/2852	12
GO:1990351	transporter complex	36/1304	332/19717	0.00242102	0.0526285	0.0473437	3786/5142/1258/8913/3770/2903/342372/776/3778/117144/55107/2904/3742/64241/6331/9254/5311/3751/1741/1193/27345/783/55800/784/55013/1804/2557/9132/6548/2570/481/6330/610/6329/59285/3761	36
GO:0005874	microtubule	43/1304	416/19717	0.00246563	0.0526285	0.0473437	1540/3925/56171/4130/55567/5347/83473/201625/24137/9928/4926/283638/1770/10615/220134/3798/85462/5423/547/283987/56992/56890/26586/332/55083/54820/6683/157922/11004/221150/123720/51512/85459/51203/9493/374654/84861/54930/4751/6790/3797/126731/9212	43
GO:0000922	spindle pole	21/1304	164/19717	0.00274758	0.0566918	0.050999	123872/64793/991/1063/5347/83473/10274/4926/10615/25886/29899/26586/54820/4033/8086/84861/4751/9094/6790/10460/9212	21
GO:0034702	ion channel complex	33/1304	301/19717	0.00301351	0.060173	0.0541306	3786/5142/1258/8913/3770/2903/342372/776/3778/117144/55107/2904/3742/6331/9254/5311/3751/1741/1193/27345/783/55800/784/55013/1804/2557/9132/2570/6330/610/6329/59285/3761	33
GO:0031528	microvillus membrane	6/1304	23/19717	0.00314479	0.0608321	0.0547235	634/53841/5794/200958/8842/5174	6
GO:0000776	kinetochore	18/1304	135/19717	0.00345021	0.0647175	0.0582188	1063/4928/701/5347/57082/10615/81929/220134/151246/26039/332/54820/11004/83540/221150/10403/4751/9212	18
GO:0042383	sarcolemma	18/1304	136/19717	0.00373712	0.0662963	0.059639	6717/776/1293/1292/6331/783/784/7043/23336/7871/64091/6548/6518/6513/481/493829/59285/1291	18
GO:0016328	lateral plasma membrane	10/1304	57/19717	0.00385568	0.0662963	0.059639	2065/4640/4926/634/6331/128239/29899/3728/9076/4072	10
GO:0032589	neuron projection membrane	10/1304	57/19717	0.00385568	0.0662963	0.059639	134/4355/6092/84059/9750/6506/2557/5064/2852/7070	10
GO:0034992	microtubule organizing center attachment site	4/1304	11/19717	0.00431324	0.0667474	0.0600448	23345/23224/161176/163183	4
GO:0034993	meiotic nuclear membrane microtubule tethering complex	4/1304	11/19717	0.00431324	0.0667474	0.0600448	23345/23224/161176/163183	4
GO:0106083	nuclear membrane protein complex	4/1304	11/19717	0.00431324	0.0667474	0.0600448	23345/23224/161176/163183	4
GO:0106094	nuclear membrane microtubule tethering complex	4/1304	11/19717	0.00431324	0.0667474	0.0600448	23345/23224/161176/163183	4
GO:0098687	chromosomal region	36/1304	347/19717	0.00498793	0.0753056	0.0677437	1063/4928/701/5347/10274/9878/57082/10615/9918/81929/220134/1788/151246/201516/4361/26039/332/11200/4175/54820/5888/64151/7290/11004/83540/142/221150/55791/10403/4751/6790/79075/9212/8361/8365/8362	36
GO:0043195	terminal bouton	9/1304	51/19717	0.00575347	0.0828347	0.0745167	6571/1258/23025/134/7054/440279/5024/4983/339302	9
GO:0031253	cell projection membrane	34/1304	326/19717	0.00575427	0.0828347	0.0745167	1258/11136/5172/134/57608/23224/4355/634/6092/9026/5311/84059/9750/140803/29881/53841/6506/5794/50649/200958/8842/2557/10568/80045/8394/5662/10938/5064/30845/2683/129880/2852/7070/5174	34
GO:1990454	L-type voltage-gated calcium channel complex	4/1304	12/19717	0.00613417	0.0862967	0.077631	776/783/784/59285	4
GO:0005891	voltage-gated calcium channel complex	8/1304	43/19717	0.00651457	0.0896115	0.080613	5142/8913/776/117144/9254/783/784/59285	8
GO:0099056	integral component of presynaptic membrane	11/1304	73/19717	0.00821073	0.110488	0.0993931	776/134/1949/114/9378/6506/5024/6532/1008/27253/1268	11
GO:0099568	cytoplasmic region	27/1304	251/19717	0.00872437	0.114897	0.103359	123872/56171/1063/4130/55567/24137/23025/4747/4926/440279/1770/3798/26074/9026/5311/9699/547/2736/85452/29899/2735/54768/6683/54443/23011/126731/129880	27
GO:0043197	dendritic spine	19/1304	159/19717	0.0089096	0.114897	0.103359	5142/6717/2903/9162/134/4355/55619/9026/3751/5024/8851/11178/4983/3781/6543/54873/5662/2852/4900	19
GO:0044309	neuron spine	19/1304	161/19717	0.0101275	0.127313	0.114528	5142/6717/2903/9162/134/4355/55619/9026/3751/5024/8851/11178/4983/3781/6543/54873/5662/2852/4900	19
GO:0005635	nuclear envelope	44/1304	464/19717	0.0102837	0.127313	0.114528	2081/23345/83990/1063/23411/4928/114880/9635/23223/23588/23224/64782/57508/81929/1844/286148/5733/166336/204219/9378/91181/5024/1536/100101267/6683/4033/83860/4258/51514/3930/142/5027/161176/163183/894/8086/23592/146705/666/2852/127845/27346/148327/10017	44
GO:0001518	voltage-gated sodium channel complex	4/1304	14/19717	0.0111555	0.131352	0.118162	6331/55800/6330/6329	4
GO:0030673	axolemma	4/1304	14/19717	0.0111555	0.131352	0.118162	134/6092/6506/7070	4
GO:0005911	cell-cell junction	40/1304	416/19717	0.0112466	0.131352	0.118162	2195/57530/5244/963/8476/57608/144100/79652/5493/8531/634/6331/5311/54566/1741/128239/84552/55679/23336/2125/7855/26872/10256/6548/5027/3728/2549/9076/6513/2702/81607/481/6330/5777/4072/3815/93643/2683/24145/9618	40
GO:0099699	integral component of synaptic membrane	18/1304	152/19717	0.0116968	0.132492	0.119188	2903/776/134/8829/1949/3751/114/9378/2894/6506/5024/6532/2912/1008/2557/27253/1268/2693	18
GO:0043679	axon terminus	15/1304	119/19717	0.0118929	0.132492	0.119188	6571/1258/6717/23025/9162/134/7054/440279/3742/5798/246213/5024/4983/339302/2852	15
GO:0017053	transcription repressor complex	11/1304	77/19717	0.0121371	0.132492	0.119188	7704/7023/55758/5978/63976/6913/161882/23493/3068/1045/1810	11
GO:0099240	intrinsic component of synaptic membrane	19/1304	164/19717	0.0122004	0.132492	0.119188	6900/2903/776/134/8829/1949/3751/114/9378/2894/6506/5024/6532/2912/1008/2557/27253/1268/2693	19
GO:0042629	mast cell granule	5/1304	22/19717	0.0128373	0.134683	0.121159	8013/3815/7462/50487/4878	5
GO:0097038	perinuclear endoplasmic reticulum	5/1304	22/19717	0.0128373	0.134683	0.121159	114880/64764/1536/1191/50507	5
GO:0150034	distal axon	29/1304	285/19717	0.0139674	0.137406	0.123608	6571/55811/1258/6717/7248/23025/22853/9162/4747/134/7054/8829/440279/3742/5798/246213/10439/1741/26053/5024/8851/25861/4983/1268/339302/57616/65078/2852/7070	29
GO:0000778	condensed nuclear chromosome kinetochore	4/1304	15/19717	0.0144288	0.137406	0.123608	701/5347/83540/10403	4
GO:0005639	integral component of nuclear inner membrane	4/1304	15/19717	0.0144288	0.137406	0.123608	5024/3930/5027/23592	4
GO:0031229	intrinsic component of nuclear inner membrane	4/1304	15/19717	0.0144288	0.137406	0.123608	5024/3930/5027/23592	4
GO:0031616	spindle pole centrosome	4/1304	15/19717	0.0144288	0.137406	0.123608	4926/54820/6790/9212	4
GO:0043020	NADPH oxidase complex	4/1304	15/19717	0.0144288	0.137406	0.123608	53905/1536/50507/653361	4
GO:0046658	anchored component of plasma membrane	9/1304	59/19717	0.0148433	0.139212	0.125233	6900/84966/2817/11126/11181/65078/80329/7070/2352	9
GO:0035098	ESC/E(Z) complex	4/1304	16/19717	0.0182504	0.168612	0.15168	23411/23512/3720/29947	4
GO:0031233	intrinsic component of external side of plasma membrane	5/1304	24/19717	0.0185739	0.169077	0.152099	84966/2152/65078/7070/2352	5
GO:0098889	intrinsic component of presynaptic membrane	11/1304	82/19717	0.0188818	0.169389	0.15238	776/134/1949/114/9378/6506/5024/6532/1008/27253/1268	11
GO:0099738	cell cortex region	7/1304	42/19717	0.0191711	0.169528	0.152504	23025/4926/440279/5311/9699/29899/54443	7
GO:0030315	T-tubule	8/1304	52/19717	0.0200505	0.174807	0.157253	6717/776/6331/783/784/7043/6548/59285	8
GO:0031526	brush border membrane	8/1304	53/19717	0.022291	0.191232	0.172029	11136/5172/140803/29881/53841/10568/2683/5174	8
GO:0051233	spindle midzone	6/1304	34/19717	0.0225524	0.191232	0.172029	5347/9928/4926/9094/6790/9212	6
GO:0045211	postsynaptic membrane	31/1304	323/19717	0.023971	0.200514	0.180379	6900/23345/8301/93664/2903/9162/3778/134/8829/2904/440073/1949/375323/3751/114/1741/84966/2894/6532/2912/1008/11178/2557/27253/5913/2570/23229/9454/3761/93650/4900	31
GO:0043256	laminin complex	3/1304	10/19717	0.0243724	0.201153	0.180954	3911/3918/59277	3
GO:0005640	nuclear outer membrane	5/1304	26/19717	0.0257801	0.209972	0.188887	23345/23224/161176/163183/666	5
GO:0034704	calcium channel complex	9/1304	66/19717	0.0290577	0.23188	0.208595	5142/8913/776/117144/9254/783/784/55013/59285	9
GO:0043198	dendritic shaft	6/1304	36/19717	0.0292191	0.23188	0.208595	4130/4355/1741/11178/65078/2852	6
GO:0097431	mitotic spindle pole	5/1304	27/19717	0.0299682	0.232714	0.209346	10274/4926/10615/29899/6790	5
GO:0016605	PML body	12/1304	99/19717	0.0300761	0.232714	0.209346	23411/54778/7704/7156/4361/26993/11200/10891/28996/6304/5888/7290	12
GO:0005583	fibrillar collagen trimer	3/1304	11/19717	0.0318946	0.237864	0.213979	50509/1301/1277	3
GO:0072687	meiotic spindle	3/1304	11/19717	0.0318946	0.237864	0.213979	79866/6790/26271	3
GO:0098643	banded collagen fibril	3/1304	11/19717	0.0318946	0.237864	0.213979	50509/1301/1277	3
GO:0031362	anchored component of external side of plasma membrane	4/1304	19/19717	0.0332106	0.244731	0.220156	84966/65078/7070/2352	4
GO:0044306	neuron projection terminus	15/1304	138/19717	0.0395028	0.287673	0.258786	6571/1258/6717/23025/9162/134/7054/440279/3742/5798/246213/5024/4983/339302/2852	15
GO:0030665	clathrin-coated vesicle membrane	13/1304	115/19717	0.0404492	0.29114	0.261905	6571/8218/8301/2535/338/9026/114/7855/685/374/7039/348/4900	13
GO:0001917	photoreceptor inner segment	7/1304	49/19717	0.0410577	0.292123	0.262789	9696/4647/2026/84059/5470/25861/2979	7
GO:0098982	GABA-ergic synapse	9/1304	71/19717	0.0437514	0.307752	0.276848	440073/3751/9378/1008/2557/27253/1268/176/2570	9
GO:0048787	presynaptic active zone membrane	5/1304	30/19717	0.0449859	0.310376	0.279209	776/9162/9378/1008/8676	5
GO:0014704	intercalated disc	7/1304	50/19717	0.0451274	0.310376	0.279209	6331/6548/3728/6513/2702/481/6330	7
