# Supplementary material for: Whole-Transcriptome Sequencing Analyses of Nuclear Antixoxidant-1 in Endothelial Cells: Role in Inflammation and Atherosclerosis
Source: Cells. 2022 Sep 18;11(18):2919. doi: 10.3390/cells11182919 (PMC9496719; doi:10.3390/cells11182919)
Supplement: Supplementary file 1 [file cells-11-02919-s001.zip › Supplementary Table S5 - Atox1_GO_MF pathway.xlsx]

## Sheet: Atox1_GO_MF
Supplementary Table S5. Related to Supp. Fig. S1C. Gene Oncology (Molecular function) analysis of genes listed in Supplementary Tables S1 and S2
ID	Description	GeneRatio	BgRatio	pvalue	p.adjust	qvalue	geneID	Count
GO:0015081	sodium ion transmembrane transporter activity	31/1254	150/17696	5.33e-08	5.17e-05	4.68e-05	6571/28968/389015/64849/6331/5311/6558/29850/6506/55800/6553/6532/7226/6507/10568/6533/6543/9962/6548/6539/6540/125206/25769/481/6330/6520/9153/610/54716/6580/6329	31
GO:0046873	metal ion transmembrane transporter activity	60/1254	439/17696	6.79e-07	0.000329475	0.00029819	3786/6571/9914/8913/3770/2903/342372/776/3778/3782/117144/2904/3742/28968/389015/64849/6331/9254/5311/3751/140803/57338/27345/6558/783/29850/6506/55800/784/6553/6532/7226/6507/3781/10568/6533/6543/9962/1268/55283/9132/6548/6539/6540/125206/3772/25769/481/6330/6520/9153/610/54716/152519/6580/24145/6329/59285/3761/7780	60
GO:0001228	DNA-binding transcription activator activity, RNA polymerase II-specific	57/1254	439/17696	6.43e-06	0.00167175	0.00151301	9971/9480/57822/9095/23411/10274/8521/4808/7702/8061/11108/7023/6664/4211/23598/64764/5090/2736/4005/90993/25833/10002/9496/8626/5978/7020/2099/3664/6297/6596/4602/84699/1879/2004/153222/7161/6913/8320/142/8538/2103/8013/60529/81566/30009/5966/6899/7294/2115/1870/4760/55897/148327/4990/5459/389692/4303	57
GO:0001216	DNA-binding transcription activator activity	57/1254	440/17696	6.89e-06	0.00167175	0.00151301	9971/9480/57822/9095/23411/10274/8521/4808/7702/8061/11108/7023/6664/4211/23598/64764/5090/2736/4005/90993/25833/10002/9496/8626/5978/7020/2099/3664/6297/6596/4602/84699/1879/2004/153222/7161/6913/8320/142/8538/2103/8013/60529/81566/30009/5966/6899/7294/2115/1870/4760/55897/148327/4990/5459/389692/4303	57
GO:0001102	RNA polymerase II activating transcription factor binding	14/1254	53/17696	1.31e-05	0.0025428	0.00230135	9095/4808/1387/4005/9496/5308/28996/6913/8320/161882/23493/30009/6899/4760	14
GO:0015291	secondary active transmembrane transporter activity	35/1254	237/17696	2.79e-05	0.00450509	0.00407732	6571/83733/5172/51296/253512/28968/389015/64849/246213/51151/10864/117247/6558/6506/65012/6553/6532/56606/6507/10568/6533/6543/9962/6548/6539/6540/125206/25769/6520/9153/23539/54716/6580/1468/347051	35
GO:0015370	solute:sodium symporter activity	16/1254	73/17696	4.11e-05	0.00549706	0.0049751	6571/28968/64849/6558/6506/6532/6507/10568/6533/9962/6539/6540/125206/9153/54716/6580	16
GO:0005328	neurotransmitter:sodium symporter activity	9/1254	26/17696	4.53e-05	0.00549706	0.0049751	6571/28968/6506/6532/6507/6533/6539/6540/54716	9
GO:0022804	active transmembrane transporter activity	45/1254	349/17696	6.97e-05	0.00707761	0.00640556	23460/6571/83733/9914/5172/5244/51296/253512/10350/28968/64241/389015/64849/246213/51151/10864/117247/19/6558/5243/6506/65012/6553/6532/56606/9429/6507/10568/6533/6543/9962/6548/6539/6540/125206/25769/481/6520/9153/23539/54716/222962/6580/1468/347051	45
GO:0015293	symporter activity	24/1254	144/17696	7.3e-05	0.00707761	0.00640556	6571/83733/51296/28968/64849/246213/51151/6558/6506/6532/56606/6507/10568/6533/9962/6539/6540/125206/25769/9153/23539/54716/6580/347051	24
GO:0015294	solute:cation symporter activity	19/1254	103/17696	0.000101164	0.00892085	0.00807378	6571/51296/28968/64849/51151/6558/6506/6532/56606/6507/10568/6533/9962/6539/6540/125206/9153/54716/6580	19
GO:0120020	cholesterol transfer activity	7/1254	18/17696	0.000140088	0.0113238	0.0102485	57476/338/64241/54762/19/57655/348	7
GO:0005326	neurotransmitter transmembrane transporter activity	12/1254	51/17696	0.000181275	0.0135259	0.0122416	6571/83733/28968/246213/6506/6532/6507/6533/6539/6540/54716/6580	12
GO:0120015	sterol transfer activity	7/1254	19/17696	0.000208283	0.0141358	0.0127935	57476/338/64241/54762/19/57655/348	7
GO:0015077	monovalent inorganic cation transmembrane transporter activity	47/1254	388/17696	0.000218594	0.0141358	0.0127935	3786/6571/9914/3770/3778/3782/51296/3742/28968/389015/64849/6331/5311/51151/3751/27345/6558/29850/6506/55800/6553/6532/7226/56606/6507/3781/10568/6533/6543/9962/9132/6548/6539/6540/125206/3772/25769/481/6330/6520/9153/610/54716/84419/6580/6329/3761	47
GO:0008017	microtubule binding	33/1254	246/17696	0.000300036	0.017536	0.0158709	4130/5347/83473/24137/56896/440193/9928/4926/10615/220134/3798/85462/5423/547/56992/2735/56890/332/11178/55083/54820/6683/157922/11004/123720/9832/85459/51203/9493/374654/54930/3797/126731	33
GO:0005244	voltage-gated ion channel activity	28/1254	197/17696	0.000325411	0.017536	0.0158709	3786/8913/3770/2903/776/3778/117144/55107/2904/3742/6331/9254/5311/3751/1193/783/29850/55800/784/1536/1268/9132/3772/6330/610/6329/59285/3761	28
GO:0022832	voltage-gated channel activity	28/1254	197/17696	0.000325411	0.017536	0.0158709	3786/8913/3770/2903/776/3778/117144/55107/2904/3742/6331/9254/5311/3751/1193/783/29850/55800/784/1536/1268/9132/3772/6330/610/6329/59285/3761	28
GO:0022836	gated channel activity	42/1254	343/17696	0.000368423	0.018809	0.017023	3786/1258/8913/3770/2903/776/57156/3778/9635/3782/117144/55107/2904/3742/6331/9254/5311/3751/1193/57338/27345/783/2894/29850/5024/55800/784/7226/1536/2557/3781/1268/55283/9132/5027/3772/2570/6330/610/6329/59285/3761	42
GO:0005227	calcium activated cation channel activity	8/1254	28/17696	0.000536822	0.0260359	0.0235637	57156/3778/3782/117144/55107/27345/29850/3781	8
GO:0003777	microtubule motor activity	15/1254	84/17696	0.000752621	0.0344498	0.0311786	56171/55567/201625/24137/9928/1770/3798/547/144132/56992/55083/11004/9493/374654/3797	15
GO:0015085	calcium ion transmembrane transporter activity	21/1254	139/17696	0.000781335	0.0344498	0.0311786	9914/8913/2903/342372/776/117144/2904/9254/5311/140803/57338/783/784/7226/6543/1268/55283/25769/6520/24145/59285	21
GO:0033613	activating transcription factor binding	15/1254	85/17696	0.00085515	0.0354063	0.0320443	9095/4808/1387/4005/9496/5308/28996/63976/6913/8320/161882/23493/30009/6899/4760	15
GO:0008509	anion transmembrane transporter activity	40/1254	336/17696	0.000876031	0.0354063	0.0320443	6571/83733/11136/5172/9635/55107/253512/634/389015/64849/246213/10864/117247/19/1193/6558/6506/363/65012/6553/146167/6532/376497/200931/56606/6507/2557/6533/9962/6548/6539/6540/2570/25769/6513/6520/23539/54716/6580/1468	40
GO:0005261	cation channel activity	40/1254	337/17696	0.000927889	0.0360021	0.0325836	3786/1258/8913/3770/2903/342372/776/57156/3778/3782/117144/55107/2904/3742/6331/9254/5311/3751/140803/57338/27345/783/29850/5024/55800/784/7226/3781/1268/55283/9132/5027/3772/25769/6330/610/24145/6329/59285/3761	40
GO:0015248	sterol transporter activity	8/1254	31/17696	0.00112643	0.0402752	0.036451	114880/57476/338/64241/54762/19/57655/348	8
GO:0005342	organic acid transmembrane transporter activity	22/1254	153/17696	0.00116259	0.0402752	0.036451	83733/11136/5172/253512/634/64849/246213/117247/6506/65012/146167/376497/200931/6507/6533/9962/6539/6540/6520/23539/54716/1468	22
GO:0046943	carboxylic acid transmembrane transporter activity	22/1254	153/17696	0.00116259	0.0402752	0.036451	83733/11136/5172/253512/634/64849/246213/117247/6506/65012/146167/376497/200931/6507/6533/9962/6539/6540/6520/23539/54716/1468	22
GO:0005310	dicarboxylic acid transmembrane transporter activity	9/1254	39/17696	0.00133237	0.043089	0.0389975	83733/5172/253512/64849/246213/6506/65012/6507/1468	9
GO:0022853	active ion transmembrane transporter activity	30/1254	236/17696	0.00133265	0.043089	0.0389975	6571/9914/5172/51296/28968/389015/64849/51151/10864/6558/6506/65012/6553/6532/56606/6507/10568/6533/6543/9962/6548/6539/6540/125206/25769/481/6520/9153/54716/6580	30
GO:0003774	motor activity	20/1254	136/17696	0.00144502	0.045215	0.0409216	56171/4640/55567/57530/201625/24137/9928/4647/1770/4542/3798/547/144132/56992/55083/4621/11004/9493/374654/3797	20
GO:0004674	protein serine/threonine kinase activity	48/1254	439/17696	0.00180952	0.054851	0.0496427	2965/2081/701/5347/10290/8444/167359/11213/5587/22853/7049/81788/8476/5891/4140/84254/4052/80122/9262/54101/51265/140803/80216/65975/11200/152110/30811/5292/28996/673/8895/9833/5607/5608/23476/10420/55872/5588/8550/4752/9020/8425/4751/6790/27102/269/9212/1195	48
GO:0005248	voltage-gated sodium channel activity	6/1254	20/17696	0.00204309	0.0589377	0.0533413	6331/5311/55800/6330/610/6329	6
GO:0035497	cAMP response element binding	5/1254	14/17696	0.00206586	0.0589377	0.0533413	64764/90993/84699/8013/148327	5
GO:0022843	voltage-gated cation channel activity	20/1254	142/17696	0.00244404	0.0677349	0.0613032	3786/8913/3770/2903/776/3778/117144/2904/3742/9254/5311/3751/783/784/1268/9132/3772/610/59285/3761	20
GO:0005262	calcium channel activity	18/1254	123/17696	0.00257527	0.0693465	0.0627618	8913/2903/342372/776/117144/2904/9254/5311/140803/57338/783/784/7226/1268/55283/25769/24145/59285	18
GO:0005496	steroid binding	15/1254	95/17696	0.0027052	0.0693465	0.0627618	9971/114880/57476/7421/54762/19/54852/8842/2099/3290/2103/6097/57655/348/2852	15
GO:0022839	ion gated channel activity	9/1254	43/17696	0.00274642	0.0693465	0.0627618	57156/3778/9635/3782/117144/55107/27345/29850/3781	9
GO:0005343	organic acid:sodium symporter activity	7/1254	28/17696	0.00278816	0.0693465	0.0627618	64849/6506/6507/6533/9962/6539/6540	7
GO:0015631	tubulin binding	38/1254	336/17696	0.00290447	0.0704333	0.0637454	3925/5142/4130/5347/83473/24137/56896/440193/9928/4926/10615/220134/3798/85462/5423/547/56992/2735/56890/8851/332/10891/11178/84688/55083/54820/6683/157922/11004/123720/9832/85459/51203/9493/374654/54930/3797/126731	38
GO:0015145	monosaccharide transmembrane transporter activity	6/1254	22/17696	0.00348079	0.0823504	0.0745309	148808/56606/9962/125206/6518/6513	6
GO:0015378	sodium:chloride symporter activity	4/1254	10/17696	0.00372681	0.0842767	0.0762743	6571/6558/6532/6580	4
GO:0001217	DNA-binding transcription repressor activity	29/1254	242/17696	0.00382286	0.0842767	0.0762743	23316/6498/7704/8531/53335/4084/639/55553/90993/5978/7020/144455/6304/2004/6913/51513/161882/2016/3720/23493/4601/64376/1045/30009/4488/6097/2307/339344/4825	29
GO:0001227	DNA-binding transcription repressor activity, RNA polymerase II-specific	29/1254	242/17696	0.00382286	0.0842767	0.0762743	23316/6498/7704/8531/53335/4084/639/55553/90993/5978/7020/144455/6304/2004/6913/51513/161882/2016/3720/23493/4601/64376/1045/30009/4488/6097/2307/339344/4825	29
GO:0030215	semaphorin receptor binding	6/1254	23/17696	0.004431	0.0935864	0.0847	10500/56920/57556/10371/10512/57715	6
GO:0015171	amino acid transmembrane transporter activity	12/1254	72/17696	0.00443812	0.0935864	0.0847	83733/11136/246213/117247/6506/146167/6507/6533/6539/6540/6520/54716	12
GO:0015267	channel activity	49/1254	474/17696	0.00499636	0.102943	0.0931685	3786/1258/8913/3770/2903/342372/776/57156/3778/9635/3782/117144/55107/2904/3742/6331/9254/5311/3751/1193/140803/57338/27345/783/2894/29850/5024/55800/784/363/7226/26872/1536/2557/3781/1268/55283/9132/5027/3772/2570/25769/2702/6330/610/24145/6329/59285/3761	49
GO:0005164	tumor necrosis factor receptor binding	7/1254	31/17696	0.00514056	0.102943	0.0931685	7292/7185/9966/7188/8600/9618/8743	7
GO:0022803	passive transmembrane transporter activity	49/1254	475/17696	0.00520023	0.102943	0.0931685	3786/1258/8913/3770/2903/342372/776/57156/3778/9635/3782/117144/55107/2904/3742/6331/9254/5311/3751/1193/140803/57338/27345/783/2894/29850/5024/55800/784/363/7226/26872/1536/2557/3781/1268/55283/9132/5027/3772/2570/25769/2702/6330/610/24145/6329/59285/3761	49
GO:0051119	sugar transmembrane transporter activity	6/1254	24/17696	0.00555942	0.107853	0.0976117	148808/56606/9962/125206/6518/6513	6
GO:0003714	transcription corepressor activity	28/1254	238/17696	0.00570423	0.108468	0.0981682	9971/23411/4665/9318/8531/1788/4084/1789/9734/862/1387/56956/55758/8204/29995/51460/25937/167465/28996/144455/7290/23429/3068/4601/1045/1810/387893/54738	28
GO:0003779	actin binding	45/1254	431/17696	0.00581476	0.108468	0.0981682	9696/23345/6708/3983/4640/4130/4703/57530/22998/3778/65108/653145/4647/23224/6710/4542/9535/634/9026/85462/22846/114/2036/64127/84940/783/129446/63876/6532/8851/7111/4983/8522/4621/752/286527/4046/161176/123720/54443/10677/50853/24145/257144/11013	45
GO:0005245	voltage-gated calcium channel activity	9/1254	48/17696	0.00594388	0.108784	0.0984547	8913/776/117144/9254/5311/783/784/1268/59285	9
GO:0002039	p53 binding	11/1254	66/17696	0.0063133	0.113406	0.102637	23411/4193/23650/1387/56254/8626/23476/7161/83860/8550/387893	11
GO:0004713	protein tyrosine kinase activity	18/1254	134/17696	0.00647104	0.114126	0.103289	2065/8444/22853/2046/8829/1949/1436/5979/28996/9833/5607/5608/7525/7465/10420/7294/3815/1195	18
GO:0005216	ion channel activity	45/1254	435/17696	0.00684793	0.116582	0.105512	3786/1258/8913/3770/2903/342372/776/57156/3778/9635/3782/117144/55107/2904/3742/6331/9254/5311/3751/1193/140803/57338/27345/783/2894/29850/5024/55800/784/7226/2557/3781/1268/55283/9132/5027/3772/2570/25769/6330/610/24145/6329/59285/3761	45
GO:0051015	actin filament binding	24/1254	198/17696	0.00696809	0.116582	0.105512	23345/6708/3983/4640/4703/653145/4647/23224/6710/9026/84940/783/129446/63876/6532/8851/7111/8522/4621/752/161176/10677/50853/24145	24
GO:0038191	neuropilin binding	5/1254	18/17696	0.00697088	0.116582	0.105512	10500/56920/10371/10512/57715	5
GO:0005272	sodium channel activity	8/1254	41/17696	0.00726801	0.119491	0.108145	6331/5311/29850/55800/7226/6330/610/6329	8
GO:0008514	organic anion transmembrane transporter activity	25/1254	210/17696	0.00748632	0.121029	0.109537	83733/11136/5172/253512/634/64849/246213/10864/117247/6506/65012/146167/376497/200931/56606/6507/6533/9962/6539/6540/6513/6520/23539/54716/1468	25
GO:0016175	superoxide-generating NADPH oxidase activity	4/1254	12/17696	0.0078351	0.123128	0.111437	53905/1536/50507/653361	4
GO:0005516	calmodulin binding	24/1254	200/17696	0.00787004	0.123128	0.111437	3786/4640/23025/65108/3782/6004/4647/440279/84254/8877/4542/634/6331/114/128239/6236/4621/3781/157922/6543/9132/6548/8550/4900	24
GO:0015491	cation:cation antiporter activity	6/1254	26/17696	0.00842307	0.129689	0.117374	389015/6553/6543/6548/25769/6520	6
GO:0015079	potassium ion transmembrane transporter activity	20/1254	159/17696	0.00879687	0.133328	0.120668	3786/3770/3778/3782/3742/389015/5311/3751/27345/6558/29850/6553/3781/9132/6548/3772/25769/481/610/3761	20
GO:0019199	transmembrane receptor protein kinase activity	12/1254	79/17696	0.00939588	0.140215	0.126901	2065/22853/2046/7049/8829/1949/4052/1436/5979/8425/3815/269	12
GO:0001221	transcription cofactor binding	8/1254	43/17696	0.00973344	0.140917	0.127536	8863/5187/2099/8013/3068/8463/905/6097	8
GO:0004712	protein serine/threonine/tyrosine kinase activity	8/1254	43/17696	0.00973344	0.140917	0.127536	8444/5607/5608/10420/8550/6790/9212/1195	8
GO:0043175	RNA polymerase core enzyme binding	10/1254	61/17696	0.0101083	0.141258	0.127845	9221/51322/26523/2959/51585/57466/54700/23476/144108/2103	10
GO:0045499	chemorepellent activity	6/1254	27/17696	0.0101939	0.141258	0.127845	10500/56920/57556/10371/10512/57715	6
GO:0099604	ligand-gated calcium channel activity	6/1254	27/17696	0.0101939	0.141258	0.127845	2903/2904/5311/57338/7226/55283	6
GO:0016887	ATPase activity	44/1254	434/17696	0.0104536	0.142056	0.128567	23460/2965/83990/56171/55567/83473/29028/24137/5244/4438/9928/9044/4647/1770/10350/54454/64241/3798/8318/6595/19/547/144132/10973/56992/5243/6832/4361/4175/54456/9429/6596/6683/5888/79915/7153/11004/83479/481/9188/9493/374654/3797/79075	44
GO:0005283	amino acid:sodium symporter activity	4/1254	13/17696	0.0106908	0.142056	0.128567	6506/6507/6539/6540	4
GO:0015373	anion:sodium symporter activity	4/1254	13/17696	0.0106908	0.142056	0.128567	6571/6558/6532/6580	4
GO:0005355	glucose transmembrane transporter activity	5/1254	20/17696	0.0112089	0.144969	0.131203	148808/56606/125206/6518/6513	5
GO:0015149	hexose transmembrane transporter activity	5/1254	20/17696	0.0112089	0.144969	0.131203	148808/56606/125206/6518/6513	5
GO:0061629	RNA polymerase II-specific DNA-binding transcription factor binding	30/1254	277/17696	0.0134734	0.171457	0.155176	9971/9095/23411/9969/4808/7421/1387/2959/4005/9496/8204/10891/167465/2099/5308/28996/6913/1407/84660/8320/142/55791/161882/3728/23493/8013/30009/6899/129880/4760	30
GO:0015144	carbohydrate transmembrane transporter activity	7/1254	37/17696	0.0139038	0.171457	0.155176	148808/51151/56606/9962/125206/6518/6513	7
GO:0005313	L-glutamate transmembrane transporter activity	4/1254	14/17696	0.0141408	0.171457	0.155176	83733/246213/6506/6507	4
GO:0015172	acidic amino acid transmembrane transporter activity	4/1254	14/17696	0.0141408	0.171457	0.155176	83733/246213/6506/6507	4
GO:0015556	C4-dicarboxylate transmembrane transporter activity	4/1254	14/17696	0.0141408	0.171457	0.155176	83733/253512/64849/1468	4
GO:0032813	tumor necrosis factor receptor superfamily binding	8/1254	46/17696	0.0145269	0.173964	0.157446	7292/7185/64114/9966/7188/8600/9618/8743	8
GO:0003707	steroid hormone receptor activity	9/1254	56/17696	0.0162019	0.189973	0.171934	9971/7421/10002/2099/2516/2103/8013/6097/2852	9
GO:0004879	nuclear receptor activity	8/1254	47/17696	0.0164513	0.189973	0.171934	9971/7421/10002/2099/2516/2103/8013/6097	8
GO:0098531	ligand-activated transcription factor activity	8/1254	47/17696	0.0164513	0.189973	0.171934	9971/7421/10002/2099/2516/2103/8013/6097	8
GO:0050431	transforming growth factor beta binding	5/1254	22/17696	0.0169267	0.192115	0.173873	7049/4052/7043/375387/8425	5
GO:0008237	metallopeptidase activity	21/1254	181/17696	0.01755	0.192115	0.173873	29953/56999/5069/9635/7093/10004/4322/11096/93979/22846/1359/6051/170689/1368/4313/9509/79148/4048/57140/4320/155185	21
GO:0070063	RNA polymerase binding	11/1254	76/17696	0.0177188	0.192115	0.173873	9221/51322/26523/2959/51585/57466/54700/23476/144108/2103/905	11
GO:0015276	ligand-gated ion channel activity	17/1254	138/17696	0.0180374	0.192115	0.173873	1258/3770/2903/9635/2904/5311/57338/2894/5024/7226/2557/55283/5027/3772/2570/610/3761	17
GO:0022834	ligand-gated channel activity	17/1254	138/17696	0.0180374	0.192115	0.173873	1258/3770/2903/9635/2904/5311/57338/2894/5024/7226/2557/55283/5027/3772/2570/610/3761	17
GO:0005024	transforming growth factor beta-activated receptor activity	4/1254	15/17696	0.0182213	0.192115	0.173873	7049/4052/8425/269	4
GO:0015269	calcium-activated potassium channel activity	4/1254	15/17696	0.0182213	0.192115	0.173873	3778/3782/27345/3781	4
GO:0034483	heparan sulfate sulfotransferase activity	4/1254	15/17696	0.0182213	0.192115	0.173873	9348/9951/9956/9394	4
GO:0001223	transcription coactivator binding	5/1254	23/17696	0.0203978	0.212751	0.19255	2099/8013/8463/905/6097	5
GO:0005201	extracellular matrix structural constituent	19/1254	163/17696	0.0220713	0.227757	0.206131	84467/50509/7286/3911/50939/3918/1301/4588/7007/4052/1293/1292/9370/1277/7450/176/2331/8425/1291	19
GO:0015116	sulfate transmembrane transporter activity	4/1254	16/17696	0.0229612	0.228621	0.206913	5172/253512/65012/1468	4
GO:0015377	cation:chloride symporter activity	4/1254	16/17696	0.0229612	0.228621	0.206913	6571/6558/6532/6580	4
GO:0022821	potassium ion antiporter activity	4/1254	16/17696	0.0229612	0.228621	0.206913	389015/6553/6548/25769	4
GO:0015298	solute:cation antiporter activity	6/1254	32/17696	0.0230978	0.228621	0.206913	389015/6553/6543/6548/25769/6520	6
GO:0120013	lipid transfer activity	7/1254	41/17696	0.0237694	0.232892	0.210778	57476/338/64241/54762/19/57655/348	7
GO:0005217	intracellular ligand-gated ion channel activity	6/1254	33/17696	0.0265906	0.257929	0.233438	1258/5311/57338/7226/55283/610	6
GO:0004675	transmembrane receptor protein serine/threonine kinase activity	4/1254	17/17696	0.0283826	0.260079	0.235383	7049/4052/8425/269	4
GO:0005416	amino acid:cation symporter activity	4/1254	17/17696	0.0283826	0.260079	0.235383	6506/6507/6539/6540	4
GO:0043024	ribosomal small subunit binding	4/1254	17/17696	0.0283826	0.260079	0.235383	7374/132864/5292/219402	4
GO:0050664	oxidoreductase activity, acting on NAD(P)H, oxygen as acceptor	4/1254	17/17696	0.0283826	0.260079	0.235383	53905/1536/50507/653361	4
GO:0055106	ubiquitin-protein transferase regulator activity	4/1254	17/17696	0.0283826	0.260079	0.235383	991/166979/55294/26271	4
GO:0008146	sulfotransferase activity	8/1254	52/17696	0.0288843	0.260079	0.235383	10090/51363/8534/9348/89792/9951/9956/9394	8
GO:0005432	calcium:sodium antiporter activity	3/1254	10/17696	0.0292254	0.260079	0.235383	6543/25769/6520	3
GO:0008331	high voltage-gated calcium channel activity	3/1254	10/17696	0.0292254	0.260079	0.235383	776/783/784	3
GO:0008525	phosphatidylcholine transporter activity	3/1254	10/17696	0.0292254	0.260079	0.235383	5244/19/5243	3
GO:0001098	basal transcription machinery binding	10/1254	72/17696	0.0299305	0.261226	0.236422	51322/26523/2959/51585/57466/2099/6873/23476/2103/51602	10
GO:0001099	basal RNA polymerase II transcription machinery binding	10/1254	72/17696	0.0299305	0.261226	0.236422	51322/26523/2959/51585/57466/2099/6873/23476/2103/51602	10
GO:0016903	oxidoreductase activity, acting on the aldehyde or oxo group of donors	7/1254	43/17696	0.0301622	0.261226	0.236422	55526/4329/594/64577/220/216/7915	7
GO:0008201	heparin binding	19/1254	169/17696	0.0307323	0.263808	0.238759	64094/462/50509/50939/3918/7049/1301/8829/338/11096/3053/170689/4753/2255/3068/348/65078/1490/56925	19
GO:1901681	sulfur compound binding	26/1254	250/17696	0.0317888	0.270484	0.2448	64094/462/55526/50509/50939/3918/7049/1301/8829/51363/338/11096/3053/32/170689/4329/89792/79777/4753/2255/3068/947/348/65078/1490/56925	26
GO:0030515	snoRNA binding	5/1254	26/17696	0.0334749	0.281909	0.25514	9221/27042/705/9188/51602	5
GO:1990939	ATP-dependent microtubule motor activity	7/1254	44/17696	0.0337541	0.281909	0.25514	56171/55567/9928/1770/3798/547/144132	7
GO:0099094	ligand-gated cation channel activity	13/1254	105/17696	0.0343362	0.281909	0.25514	1258/3770/2903/2904/5311/57338/5024/7226/55283/5027/3772/610/3761	13
GO:0008569	ATP-dependent microtubule motor activity, minus-end-directed	4/1254	18/17696	0.0345003	0.281909	0.25514	56171/55567/1770/144132	4
GO:1901682	sulfur compound transmembrane transporter activity	6/1254	35/17696	0.0345847	0.281909	0.25514	11136/5172/253512/65012/6533/1468	6
GO:0005539	glycosaminoglycan binding	24/1254	229/17696	0.0351412	0.284058	0.257086	64094/462/50509/50939/3918/7049/1301/8829/1463/338/11096/3053/64127/170689/7097/4753/2255/176/3068/8425/348/65078/1490/56925	24
GO:0015368	calcium:cation antiporter activity	3/1254	11/17696	0.038111	0.30055	0.272011	6543/25769/6520	3
GO:0015386	potassium:proton antiporter activity	3/1254	11/17696	0.038111	0.30055	0.272011	389015/6553/6548	3
GO:0031996	thioesterase binding	3/1254	11/17696	0.038111	0.30055	0.272011	7185/7188/9618	3
GO:0008066	glutamate receptor activity	5/1254	27/17696	0.0387661	0.303251	0.274456	2903/2904/2894/2912/2918	5
GO:0030165	PDZ domain binding	11/1254	86/17696	0.0400674	0.310923	0.2814	440193/7049/9928/2535/3993/1741/27071/3761/83878/5174/153	11
GO:0008083	growth factor activity	18/1254	163/17696	0.0404499	0.3114	0.281831	353500/9048/4254/1435/7042/9535/7043/2661/146433/685/2255/8817/374/3068/7039/183/8909/1490	18
GO:0005402	carbohydrate:cation symporter activity	4/1254	19/17696	0.0413223	0.313146	0.283411	51151/56606/9962/125206	4
GO:0015296	anion:cation symporter activity	4/1254	19/17696	0.0413223	0.313146	0.283411	6571/6558/6532/6580	4
GO:0032934	sterol binding	8/1254	56/17696	0.0426218	0.320489	0.290058	114880/57476/54762/19/8842/6097/57655/348	8
GO:0005319	lipid transporter activity	15/1254	131/17696	0.0443564	0.330967	0.299541	23460/5244/114880/57476/10350/634/338/64241/54762/19/5243/376497/200931/57655/348	15
GO:0001540	amyloid-beta binding	10/1254	78/17696	0.0481803	0.346347	0.31346	8301/2903/7042/2904/7855/23542/1191/7097/25825/348	10
GO:0015385	sodium:proton antiporter activity	3/1254	12/17696	0.0482029	0.346347	0.31346	389015/6553/6548	3
GO:0033130	acetylcholine receptor binding	3/1254	12/17696	0.0482029	0.346347	0.31346	79608/9378/5913	3
GO:0051011	microtubule minus-end binding	3/1254	12/17696	0.0482029	0.346347	0.31346	4926/157922/54930	3
GO:0061578	Lys63-specific deubiquitinase activity	3/1254	12/17696	0.0482029	0.346347	0.31346	1540/55432/7128	3
GO:0016408	C-acyltransferase activity	4/1254	20/17696	0.0488507	0.34842	0.315337	116285/10558/6296/38	4
