# Supplementary material for: Whole-Transcriptome Sequencing Analyses of Nuclear Antixoxidant-1 in Endothelial Cells: Role in Inflammation and Atherosclerosis
Source: Cells. 2022 Sep 18;11(18):2919. doi: 10.3390/cells11182919 (PMC9496719; doi:10.3390/cells11182919)
Supplement: Supplementary file 1 [file cells-11-02919-s001.zip › Supplementary Table S6 - Atox1_kegg pathways.xlsx]

## Sheet: Atox1_kegg
Supplementary Table S6. Fig. 4B. KEGG analysis of genes listed in Supplementary Tables S1 and S2
ID	Description	GeneRatio	BgRatio	pvalue	p.adjust	qvalue	geneID	Count
hsa04110	Cell cycle	19/574	124/8081	0.00111768	0.302373	0.289067	991/701/5347/10274/7042/4193/8318/9232/1387/7043/9133/11200/4175/993/995/7465/894/9700/1870	19
hsa05030	Cocaine addiction	10/574	49/8081	0.00198277	0.302373	0.289067	6571/2903/7054/2904/64764/90993/8851/2912/84699/148327	10
hsa04976	Bile secretion	14/574	90/8081	0.00420718	0.349687	0.3343	9971/5244/64241/10864/114/5243/200931/9429/3781/6548/570/6513/481/6580	14
hsa05202	Transcriptional misregulation in cancer	24/574	192/8081	0.00462904	0.349687	0.3343	7185/7704/4211/4193/1436/862/5090/4005/6692/26471/8842/5081/8357/51513/3728/7102/8013/894/5966/905/2115/8148/653604/54738	24
hsa04911	Insulin secretion	13/574	86/8081	0.0072914	0.349687	0.3343	776/3778/3782/64764/9699/114/27345/90993/3781/84699/6513/481/148327	13
hsa05414	Dilated cardiomyopathy	14/574	96/8081	0.00753082	0.349687	0.3343	22801/776/8515/7042/3674/9254/114/783/784/7043/6543/183/59285/153	14
hsa04261	Adrenergic signaling in cardiomyocytes	19/574	150/8081	0.00964055	0.349687	0.3343	5522/776/6331/9254/5523/64764/114/783/90993/784/84699/6543/6548/481/6330/183/59285/148327/153	19
hsa04975	Fat digestion and absorption	8/574	43/8081	0.00975835	0.349687	0.3343	338/64241/19/29881/376497/38/8399/50487	8
hsa04024	cAMP signaling pathway	25/574	216/8081	0.0103186	0.349687	0.3343	55811/5142/1258/3360/2903/776/134/2904/64764/114/5733/1387/90993/2735/338442/5021/673/84699/6548/481/610/148327/4878/2693/153	25
hsa04115	p53 signaling pathway	11/574	73/8081	0.0133411	0.406905	0.388999	4193/83667/9133/11200/63970/7161/3732/51512/894/8795/50484	11
hsa04151	PI3K-Akt signaling pathway	36/574	354/8081	0.0177145	0.491174	0.469561	2065/4254/22801/3911/5522/3918/7248/2786/1435/8515/3674/9170/1293/4193/1292/5523/1436/64764/118788/1277/90993/7450/10681/1943/4602/84699/7097/285/2255/8817/374/894/7039/3815/148327/1291	36
hsa04721	Synaptic vesicle cycle	11/574	78/8081	0.0212076	0.511331	0.488831	6571/8218/23025/440279/246213/6506/6532/6507/6539/6540/339302	11
hsa05031	Amphetamine addiction	10/574	69/8081	0.0229891	0.511331	0.488831	6571/23411/2903/776/7054/2904/64764/90993/84699/148327	10
hsa05410	Hypertrophic cardiomyopathy	12/574	90/8081	0.0247662	0.511331	0.488831	22801/776/8515/7042/3674/9254/783/784/7043/6543/183/59285	12
hsa04668	TNF signaling pathway	14/574	112/8081	0.0267975	0.511331	0.488831	7185/840/1435/64764/64127/3383/90993/23118/5608/84699/7188/9020/7128/148327	14
hsa04390	Hippo signaling pathway	18/574	157/8081	0.0292462	0.511331	0.488831	353500/5522/7042/2535/3993/1741/2736/84552/7043/332/7855/25937/7161/80326/374/894/8463/1490	18
hsa04950	Maturity onset diabetes of the young	5/574	26/8081	0.0336384	0.511331	0.488831	5313/3110/4760/4825/389692	5
hsa04928	Parathyroid hormone synthesis, secretion and action	13/574	106/8081	0.0367459	0.511331	0.488831	5142/8521/4322/7421/64764/114/90993/673/10568/84699/8600/148327/5744	13
hsa05166	Human T-cell leukemia virus 1 infection	23/574	219/8081	0.037468	0.511331	0.488831	991/701/7042/8829/8061/9232/64764/5423/114/1387/3383/90993/7043/9133/11200/84699/6513/894/9700/9020/4488/1870/148327	23
hsa02010	ABC transporters	7/574	45/8081	0.0377919	0.511331	0.488831	23460/5244/10350/64241/19/5243/9429	7
hsa00430	Taurine and hypotaurine metabolism	3/574	8081-11-01	0.0382822	0.511331	0.488831	570/2687/2678	3
hsa04918	Thyroid hormone synthesis	10/574	75/8081	0.0384361	0.511331	0.488831	5172/64764/114/90993/53905/7038/84699/481/7276/148327	10
hsa04927	Cortisol synthesis and secretion	9/574	65/8081	0.0390883	0.511331	0.488831	8913/776/64764/114/90993/2516/84699/183/148327	9
hsa05034	Alcoholism	20/574	187/8081	0.0425951	0.511331	0.488831	6571/8349/2786/2903/7054/2904/84254/9734/64764/90993/10681/79885/673/84699/8357/653604/148327/8361/8365/8362	20
hsa04010	MAPK signaling pathway	29/574	294/8081	0.0438414	0.511331	0.488831	3925/2065/4254/8913/776/1435/7042/1844/9254/1436/783/784/7043/1943/23542/23118/673/5607/5608/285/2255/80824/8550/8817/374/9020/7039/3815/59285	29
hsa05412	Arrhythmogenic right ventricular cardiomyopathy	10/574	77/8081	0.0448803	0.511331	0.488831	22801/776/8515/3674/9254/783/784/6543/3728/59285	10
hsa04512	ECM-receptor interaction	11/574	88/8081	0.0463379	0.511331	0.488831	22801/3911/3918/158326/8515/3674/1293/1292/1277/7450/1291	11
hsa04728	Dopaminergic synapse	15/574	132/8081	0.0469419	0.511331	0.488831	6571/5522/2786/2903/776/7054/1815/2904/3798/5523/64764/90993/10681/84699/148327	15
