# Supplementary material for: Whole-Transcriptome Sequencing Analyses of Nuclear Antixoxidant-1 in Endothelial Cells: Role in Inflammation and Atherosclerosis
Source: Cells. 2022 Sep 18;11(18):2919. doi: 10.3390/cells11182919 (PMC9496719; doi:10.3390/cells11182919)
Supplement: Supplementary file 1 [file cells-11-02919-s001.zip › Supplementary Table S7 - Atox1 direct target genes.xlsx]

## Sheet: chipseq_rnaseq_overlap_genes
Supplementary Table S7. Related to Figure 5. Direct Atox1 Target Genes
entrezgene	ensembl_gene_id	external_gene_name	baseMean	log2FoldChange	lfcSE	stat	foldchange	pvalue	padj	gene_biotype	external_gene_source	transcript_count	description	sample.ad_null_1	sample.ad_null_2	sample.ad_null_3	sample.ad_atox1_wt_1	sample.ad_atox1_wt_2	sample.ad_atox1_wt_3	sample.ad_atox1_nls_1	sample.ad_atox1_nls_2	sample.ad_atox1_nls_3	annotation	geneChr	geneStart	geneEnd	geneLength	distanceToTSS
153	ENSG00000043591	ADRB1	25.7646	-2.54781	0.78441	-3.24805	0.171015	0.00116197	0.00321539	protein_coding	HGNC Symbol	1	adrenoceptor beta 1 [Source:HGNC Symbol;Acc:HGNC:285]	0.58429	1.32595	1.42507	2.64907	1.76043	1.67608	0.0395546	0.234222	0.0509181	Promoter (2-3kb)	10	115803806	115806667	2862	-2452
220	ENSG00000184254	ALDH1A3	381.968	-1.33285	0.316475	-4.21153	0.396984	2.53643e-05	9.85884e-05	protein_coding	HGNC Symbol	7	aldehyde dehydrogenase 1 family member A3 [Source:HGNC Symbol;Acc:HGNC:409]	16.6369	11.7535	14.1729	4.64366	4.80478	3.29083	5.59698	2.40078	1.78213	Promoter (1-2kb)	15	101420009	101456830	36822	-1264
570	ENSG00000136881	BAAT	14.7186	4.03918	1.28133	3.15233	16.4405	0.00161971	0.00433452	protein_coding	HGNC Symbol	2	bile acid-CoA:amino acid N-acyltransferase [Source:HGNC Symbol;Acc:HGNC:932]	0	0.130958	0	0	0	0	0.118664	0.380611	0.611017	Promoter (2-3kb)	9	104122699	104147287	24589	-2024
752	ENSG00000184922	FMNL1	103.632	-1.85599	0.314266	-5.90579	0.276243	3.50951e-09	2.54176e-08	protein_coding	HGNC Symbol	12	formin like 1 [Source:HGNC Symbol;Acc:HGNC:1212]	5.33549	3.66683	3.62745	1.05963	0.60887	0.551879	0.791092	0.644112	0.509181	Promoter (<=1kb)	17	43310229	43311320	1092	-545
767	ENSG00000178538	CA8	17.9652	1.95176	0.749494	2.60411	3.86847	0.00921133	0.0204965	protein_coding	HGNC Symbol	4	carbonic anhydrase 8 [Source:HGNC Symbol;Acc:HGNC:1382]	0.215265	0.130958	0.233193	3.59962	3.34879	2.88203	0.870201	0.351334	0.101836	Promoter (<=1kb)	8	61101423	61193954	92532	609
776	ENSG00000157388	CACNA1D	5.98989	3.277	1.15735	2.83147	9.69337	0.00463343	0.011176	protein_coding	HGNC Symbol	31	calcium voltage-gated channel subunit alpha1 D [Source:HGNC Symbol;Acc:HGNC:1391]	0.0307521	0.0327396	0.0259103	0.0467483	0.10589	0.0817598	0.316437	0.0292778	0.152754	Promoter (<=1kb)	3	53700366	53846492	146127	776
783	ENSG00000165995	CACNB2	17.6724	3.48417	0.731121	4.76551	11.1902	1.88374e-06	9.0158e-06	protein_coding	HGNC Symbol	28	calcium voltage-gated channel auxiliary subunit beta 2 [Source:HGNC Symbol;Acc:HGNC:1402]	0.0307521	0.0982187	0.0906861	0.0779138	0.0529452	0	0.316437	0.468445	0.560099	Promoter (<=1kb)	10	18429606	18830688	401083	-646
784	ENSG00000167535	CACNB3	1109.18	-1.47312	0.168613	-8.7367	0.360201	2.40022e-18	5.147e-17	protein_coding	HGNC Symbol	24	calcium voltage-gated channel auxiliary subunit beta 3 [Source:HGNC Symbol;Acc:HGNC:1403]	44.0062	40.9572	41.4047	22.5794	23.8651	16.3928	11.3126	8.08067	6.26292	Promoter (1-2kb)	12	49212254	49222726	10473	1485
784	ENSG00000167535	CACNB3	1109.18	-1.47312	0.168613	-8.7367	0.360201	2.40022e-18	5.147e-17	protein_coding	HGNC Symbol	24	calcium voltage-gated channel auxiliary subunit beta 3 [Source:HGNC Symbol;Acc:HGNC:1403]	44.0062	40.9572	41.4047	22.5794	23.8651	16.3928	11.3126	8.08067	6.26292	Promoter (<=1kb)	12	49209357	49222726	13370	767
991	ENSG00000117399	CDC20	3266.28	-2.90984	0.364135	-7.99109	0.133061	1.33752e-15	2.16668e-14	protein_coding	HGNC Symbol	4	cell division cycle 20 [Source:HGNC Symbol;Acc:HGNC:1723]	128.328	145.757	170.736	9.038	9.25218	9.34106	5.61675	14.6389	11.1765	Promoter (2-3kb)	1	43824779	43828873	4095	2613
1040	ENSG00000163624	CDS1	7.6762	5.28537	1.36664	3.8674	38.999	0.000110001	0.000376118	protein_coding	HGNC Symbol	2	CDP-diacylglycerol synthase 1 [Source:HGNC Symbol;Acc:HGNC:1800]	0.015376	0	0.0129552	0.124662	0.0529452	0.02044	0.118664	0.292778	0.203672	Promoter (1-2kb)	4	85552972	85566478	13507	1537
1268	ENSG00000118432	CNR1	4.3764	6.34529	2.22499	2.85183	81.306	0.00434681	0.0105748	protein_coding	HGNC Symbol	7	cannabinoid receptor 1 [Source:HGNC Symbol;Acc:HGNC:2159]	0	0	0	0.592145	0.436798	0.265719	0	0.292778	0.0509181	Promoter (<=1kb)	6	88849585	88872742	23158	68
1293	ENSG00000163359	COL6A3	10.2882	3.62359	0.900347	4.02466	12.3256	5.70586e-05	0.000205988	protein_coding	HGNC Symbol	14	collagen type VI alpha 3 chain [Source:HGNC Symbol;Acc:HGNC:2213]	0.015376	0.0491093	0.0518206	0.202576	0.119127	0.14308	0.21755	0.351334	0.229131	Promoter (<=1kb)	2	238232655	238322850	90196	22
1293	ENSG00000163359	COL6A3	10.2882	3.62359	0.900347	4.02466	12.3256	5.70586e-05	0.000205988	protein_coding	HGNC Symbol	14	collagen type VI alpha 3 chain [Source:HGNC Symbol;Acc:HGNC:2213]	0.015376	0.0491093	0.0518206	0.202576	0.119127	0.14308	0.21755	0.351334	0.229131	Promoter (<=1kb)	2	238285415	238322850	37436	-584
1301	ENSG00000060718	COL11A1	8.70014	4.53582	1.22954	3.68905	23.1963	0.00022509	0.000721007	protein_coding	HGNC Symbol	14	collagen type XI alpha 1 chain [Source:HGNC Symbol;Acc:HGNC:2186]	0	0	0.0518206	0.109079	0.0794178	0.14308	0.336214	0.117111	0.280049	Promoter (2-3kb)	1	103342023	103574052	232030	-2269
1435	ENSG00000184371	CSF1	3096.99	1.81851	0.282492	6.43738	3.52716	1.21552e-10	1.06657e-09	protein_coding	HGNC Symbol	9	colony stimulating factor 1 [Source:HGNC Symbol;Acc:HGNC:2432]	54.2928	27.1902	25.431	183.3	108.591	89.6905	77.3095	55.5985	74.2131	Promoter (1-2kb)	1	110453233	110467824	14592	-1797
1436	ENSG00000182578	CSF1R	15.3268	3.5563	0.886691	4.01075	11.7639	6.05257e-05	0.000216789	protein_coding	HGNC Symbol	9	colony stimulating factor 1 receptor [Source:HGNC Symbol;Acc:HGNC:2433]	0.0922563	0.0982187	0	0	0.132363	0.14308	0.355991	0.322056	0.509181	Promoter (1-2kb)	5	149432854	149460587	27734	1027
1490	ENSG00000118523	CCN2	66858	-1.86004	0.350588	-5.30549	0.275469	1.12373e-07	6.55483e-07	protein_coding	HGNC Symbol	1	cellular communication network factor 2 [Source:HGNC Symbol;Acc:HGNC:2500]	3079.05	2423.01	2630.48	466.844	279.127	254.948	851.037	233.871	248.506	Promoter (<=1kb)	6	132269317	132272518	3202	-773
1540	ENSG00000083799	CYLD	2768.59	2.64867	0.234398	11.2999	6.2709	1.3139e-29	7.81959e-28	protein_coding	HGNC Symbol	16	CYLD lysine 63 deubiquitinase [Source:HGNC Symbol;Acc:HGNC:2584]	25.1552	17.221	16.8288	37.009	33.9776	25.4273	59.8857	73.8386	67.4155	Promoter (1-2kb)	16	50821697	50826616	4920	1074
1608	ENSG00000058866	DGKG	6.46369	4.98993	1.47764	3.37697	31.7775	0.000732883	0.00211496	protein_coding	HGNC Symbol	11	diacylglycerol kinase gamma [Source:HGNC Symbol;Acc:HGNC:2853]	0	0.0327396	0	0.109079	0.132363	0.0408799	0.29666	0.0585556	0.203672	Promoter (2-3kb)	3	185864990	186080023	215034	-2627
1770	ENSG00000007174	DNAH9	16.8663	3.49841	0.744646	4.69808	11.3012	2.6262e-06	1.22521e-05	protein_coding	HGNC Symbol	15	dynein axonemal heavy chain 9 [Source:HGNC Symbol;Acc:HGNC:2953]	0.0615042	0.130958	0.0259103	0.545396	0.516216	0.367919	0.692206	0.351334	0.330967	Promoter (2-3kb)	17	11554386	11873065	318680	2095
1770	ENSG00000007174	DNAH9	16.8663	3.49841	0.744646	4.69808	11.3012	2.6262e-06	1.22521e-05	protein_coding	HGNC Symbol	15	dynein axonemal heavy chain 9 [Source:HGNC Symbol;Acc:HGNC:2953]	0.0615042	0.130958	0.0259103	0.545396	0.516216	0.367919	0.692206	0.351334	0.330967	Promoter (<=1kb)	17	11554386	11873065	318680	0
1789	ENSG00000088305	DNMT3B	196.064	-2.1949	0.261489	-8.39388	0.218408	4.70347e-17	8.68081e-16	protein_coding	HGNC Symbol	6	DNA methyltransferase 3 beta [Source:HGNC Symbol;Acc:HGNC:2979]	9.10262	7.75928	8.07107	1.93226	2.48843	1.26728	1.08775	0.702667	1.22203	Promoter (1-2kb)	20	31367658	31397162	29505	1458
2065	ENSG00000065361	ERBB3	12.0631	2.16675	0.715636	3.02772	4.4901	0.00246406	0.00634742	protein_coding	HGNC Symbol	23	erb-b2 receptor tyrosine kinase 3 [Source:HGNC Symbol;Acc:HGNC:3431]	0.0615042	0.130958	0.142507	0.296072	0.172072	0.24528	0.29666	0.292778	0.25459	Promoter (<=1kb)	12	56487129	56487775	647	-305
2099	ENSG00000091831	ESR1	31.7111	4.21463	0.76207	5.5305	18.5665	3.1932e-08	2.01736e-07	protein_coding	HGNC Symbol	15	estrogen receptor 1 [Source:HGNC Symbol;Acc:HGNC:3467]	0.0461281	0.0818489	0.116596	0.514231	0.238254	0.449679	0.257105	1.14183	1.01836	Promoter (2-3kb)	6	152163859	152424408	260550	2884
2099	ENSG00000091831	ESR1	31.7111	4.21463	0.76207	5.5305	18.5665	3.1932e-08	2.01736e-07	protein_coding	HGNC Symbol	15	estrogen receptor 1 [Source:HGNC Symbol;Acc:HGNC:3467]	0.0461281	0.0818489	0.116596	0.514231	0.238254	0.449679	0.257105	1.14183	1.01836	Promoter (2-3kb)	6	151977830	152163922	186093	2723
2195	ENSG00000083857	FAT1	1261.44	3.46881	0.431375	8.04129	11.0718	8.88942e-16	1.46018e-14	protein_coding	HGNC Symbol	12	FAT atypical cadherin 1 [Source:HGNC Symbol;Acc:HGNC:3595]	2.1834	8.03756	5.76505	44.7069	87.4655	54.3294	22.7043	36.3923	36.8138	Promoter (1-2kb)	4	187508937	187516980	8044	1407
2315	ENSG00000120215	MLANA	40.3616	1.69554	0.478039	3.54686	3.23898	0.000389849	0.00118983	protein_coding	HGNC Symbol	5	melan-A [Source:HGNC Symbol;Acc:HGNC:7124]	0.369025	0.687531	0.40161	0.607727	0.780942	0.429239	0.672428	0.93689	0.967443	Promoter (1-2kb)	9	5890909	5909822	18914	1968
2487	ENSG00000162998	FRZB	25.9124	3.86798	0.653839	5.9158	14.6009	3.30259e-09	2.40037e-08	protein_coding	HGNC Symbol	1	frizzled related protein [Source:HGNC Symbol;Acc:HGNC:3959]	0.107632	0.0982187	0.0518206	0.218159	0.185308	0.0408799	0.435101	0.673389	0.891066	Promoter (2-3kb)	2	183698005	183731498	33494	2962
2549	ENSG00000109458	GAB1	568.331	-2.73858	0.212722	-12.8739	0.149833	6.30967e-38	7.09882e-36	protein_coding	HGNC Symbol	14	GRB2 associated binding protein 1 [Source:HGNC Symbol;Acc:HGNC:4066]	31.1826	24.0636	21.5574	9.92621	11.9259	6.54079	2.49194	1.72739	2.16402	Promoter (<=1kb)	4	144257983	144395718	137736	909
2817	ENSG00000063660	GPC1	5653.91	1.71913	0.215952	7.9607	3.29238	1.71068e-15	2.73342e-14	protein_coding	HGNC Symbol	9	glypican 1 [Source:HGNC Symbol;Acc:HGNC:4449]	49.7415	73.6804	79.3892	55.1006	59.0207	46.7871	150.07	106.718	118.283	Promoter (2-3kb)	2	241375115	241407495	32381	-2845
2894	ENSG00000182771	GRID1	15.2716	4.8507	1.07899	4.49558	28.854	6.9382e-06	3.015e-05	protein_coding	HGNC Symbol	3	glutamate ionotropic receptor delta type subunit 1 [Source:HGNC Symbol;Acc:HGNC:4575]	0	0.0818489	0	0.0934965	0.119127	0.429239	0.316437	0.556278	0.356426	Promoter (<=1kb)	10	87359312	87551316	192005	0
3052	ENSG00000004961	HCCS	1497.87	1.38171	0.140543	9.83123	2.60576	8.2603e-23	2.74663e-21	protein_coding	HGNC Symbol	3	holocytochrome c synthase [Source:HGNC Symbol;Acc:HGNC:4837]	21.4803	20.5768	22.1792	23.2495	24.0107	20.0925	34.3136	30.8881	27.7249	Promoter (2-3kb)	23	11129406	11141204	11799	-2459
3061	ENSG00000121764	HCRTR1	45.0644	-2.55193	0.697831	-3.65695	0.170527	0.000255239	0.000807503	protein_coding	HGNC Symbol	5	hypocretin receptor 1 [Source:HGNC Symbol;Acc:HGNC:4848]	3.05983	1.65335	1.36029	0.373986	0.476507	0.286159	0.435101	0	0.152754	Promoter (1-2kb)	1	32083301	32092919	9619	-1235
3263	ENSG00000110169	HPX	55.6158	3.22409	0.470728	6.84915	9.34431	7.42916e-12	7.58901e-11	protein_coding	HGNC Symbol	13	hemopexin [Source:HGNC Symbol;Acc:HGNC:5171]	0.261393	0.261916	0.297969	0.124662	0.330908	0.0613199	0.909756	1.8445	1.40025	Promoter (<=1kb)	11	6452268	6462254	9987	709
3290	ENSG00000117594	HSD11B1	3.64861	6.13483	1.80065	3.40701	70.2698	0.000656778	0.0019203	protein_coding	HGNC Symbol	4	hydroxysteroid 11-beta dehydrogenase 1 [Source:HGNC Symbol;Acc:HGNC:5208]	0	0	0	0.0934965	0.0529452	0.12264	0.197773	0.0585556	0.0763771	Promoter (1-2kb)	1	209859525	209908295	48771	-1693
3437	ENSG00000119917	IFIT3	79.8341	-1.94623	0.501754	-3.87886	0.259493	0.000104947	0.000360353	protein_coding	HGNC Symbol	2	interferon induced protein with tetratricopeptide repeats 3 [Source:HGNC Symbol;Acc:HGNC:5411]	5.88902	2.30814	1.77486	81.638	102.475	90.7943	0.672428	0.409889	0.356426	Promoter (<=1kb)	10	91087602	91100725	13124	590
3475	ENSG00000006652	IFRD1	2542.58	2.89657	0.228062	12.7008	7.44652	5.85466e-37	6.01054e-35	protein_coding	HGNC Symbol	17	interferon related developmental regulator 1 [Source:HGNC Symbol;Acc:HGNC:5456]	16.9905	13.7997	15.8442	52.1087	45.5858	38.652	52.9636	68.6564	66.3972	Promoter (<=1kb)	7	112107432	112117258	9827	-802
3568	ENSG00000091181	IL5RA	2.43928	5.50814	2.03114	2.71185	45.511	0.0066908	0.0154706	protein_coding	HGNC Symbol	11	interleukin 5 receptor subunit alpha [Source:HGNC Symbol;Acc:HGNC:6017]	0	0	0	0.0155828	0.0132363	0	0.0395546	0.0585556	0.101836	Promoter (<=1kb)	3	3108008	3134046	26039	0
3604	ENSG00000049249	TNFRSF9	76.555	4.36331	0.635803	6.86267	20.582	6.7586e-12	6.94723e-11	protein_coding	HGNC Symbol	4	TNF receptor superfamily member 9 [Source:HGNC Symbol;Acc:HGNC:11924]	0.246017	0.196437	0.116596	0.545396	0	0.1022	5.10254	0.731945	1.09474	Promoter (2-3kb)	1	7975931	8003225	27295	2302
3772	ENSG00000157551	KCNJ15	32.7427	-2.14798	0.697876	-3.07789	0.225628	0.00208474	0.00544245	protein_coding	HGNC Symbol	22	potassium voltage-gated channel subfamily J member 15 [Source:HGNC Symbol;Acc:HGNC:6261]	1.81437	1.06404	1.33438	0.981714	1.19127	1.022	0.435101	0.0878334	0.025459	Promoter (<=1kb)	21	39628620	39673746	45127	-916
3772	ENSG00000157551	KCNJ15	32.7427	-2.14798	0.697876	-3.07789	0.225628	0.00208474	0.00544245	protein_coding	HGNC Symbol	22	potassium voltage-gated channel subfamily J member 15 [Source:HGNC Symbol;Acc:HGNC:6261]	1.81437	1.06404	1.33438	0.981714	1.19127	1.022	0.435101	0.0878334	0.025459	Promoter (1-2kb)	21	39628620	39673746	45127	-1663
3782	ENSG00000143603	KCNN3	322.59	-2.331	0.342505	-6.80574	0.198747	1.00532e-11	1.00324e-10	protein_coding	HGNC Symbol	5	potassium calcium-activated channel subfamily N member 3 [Source:HGNC Symbol;Acc:HGNC:6292]	19.6967	12.5556	9.80706	11.952	11.595	8.3395	2.63038	1.14183	0.992902	Promoter (2-3kb)	1	154669942	154832338	162397	2003
3815	ENSG00000157404	KIT	725.315	-4.9371	0.73438	-6.72281	0.0326426	1.78253e-11	1.7183e-10	protein_coding	HGNC Symbol	4	KIT proto-oncogene receptor tyrosine kinase [Source:HGNC Symbol;Acc:HGNC:6342]	31.2441	36.6028	40.6274	0.9038	0.701524	0.16352	1.58218	0.175667	0.381885	Promoter (2-3kb)	4	55524095	55606881	82787	2633
3983	ENSG00000099204	ABLIM1	7020.51	-1.70987	0.155944	-10.9647	0.305687	5.64874e-28	3.01254e-26	protein_coding	HGNC Symbol	17	actin binding LIM protein 1 [Source:HGNC Symbol;Acc:HGNC:78]	313.425	281.577	239.088	94.1822	105.652	70.7223	62.6347	39.6129	41.2436	Promoter (<=1kb)	10	116190869	116251637	60769	-863
4005	ENSG00000135363	LMO2	743.84	-2.55649	0.337502	-7.57475	0.169988	3.59817e-14	4.99185e-13	protein_coding	HGNC Symbol	6	LIM domain only 2 [Source:HGNC Symbol;Acc:HGNC:6642]	40.9003	31.8065	26.2601	19.6343	19.1529	14.5533	5.69586	1.52245	2.52044	Promoter (<=1kb)	11	33880123	33913836	33714	-320
4033	ENSG00000118308	LRMP	4.33364	3.37676	1.42664	2.36693	10.3874	0.0179362	0.0369569	protein_coding	HGNC Symbol	21	lymphoid restricted membrane protein [Source:HGNC Symbol;Acc:HGNC:6690]	0.0307521	0	0.0259103	0.062331	0.0264726	0	0.0395546	0.204945	0.0763771	Promoter (1-2kb)	12	25205181	25241091	35911	-1128
4072	ENSG00000119888	EPCAM	92.2919	4.06472	0.426696	9.52602	16.7341	1.63425e-21	4.77656e-20	protein_coding	HGNC Symbol	6	epithelial cell adhesion molecule [Source:HGNC Symbol;Acc:HGNC:11529]	0.292145	0.180068	0.323879	1.16871	0.926541	1.28772	1.76018	2.54717	2.92779	Promoter (2-3kb)	2	47596287	47614167	17881	-2073
4193	ENSG00000135679	MDM2	24002.6	2.88577	0.224735	12.8408	7.39099	9.69185e-38	1.07566e-35	protein_coding	HGNC Symbol	34	MDM2 proto-oncogene [Source:HGNC Symbol;Acc:HGNC:6973]	134.925	162.896	144.061	208.622	227.916	143.325	514.388	589.801	671.94	Promoter (<=1kb)	12	69201971	69239320	37350	10
4211	ENSG00000143995	MEIS1	266.885	-1.66766	0.276595	-6.02926	0.314763	1.64711e-09	1.24335e-08	protein_coding	HGNC Symbol	17	Meis homeobox 1 [Source:HGNC Symbol;Acc:HGNC:7000]	12.5161	9.57632	9.40545	5.3293	5.90339	4.21063	2.19528	2.25439	1.09474	Promoter (<=1kb)	2	66662532	66799891	137360	341
4302	ENSG00000275023	MLLT6	3129.69	-1.72128	0.137679	-12.5021	0.303279	7.26664e-36	6.63121e-34	protein_coding	HGNC Symbol	11	MLLT6, PHD finger containing [Source:HGNC Symbol;Acc:HGNC:7138]	135.048	123.363	113.902	62.0505	66.5521	46.8688	26.7587	17.4788	19.0688	Promoter (<=1kb)	17	36876904	36886056	9153	0
4352	ENSG00000117400	MPL	13.3668	3.68208	0.884753	4.1617	12.8356	3.15881e-05	0.000119775	protein_coding	HGNC Symbol	4	MPL proto-oncogene, thrombopoietin receptor [Source:HGNC Symbol;Acc:HGNC:7217]	0.0307521	0.0654791	0.0518206	0.124662	0.119127	0.0817598	0.237328	0.175667	0.611017	Promoter (2-3kb)	1	43803475	43815208	11734	-2535
4854	ENSG00000074181	NOTCH3	296.875	-1.35109	0.268046	-5.04051	0.391996	4.64303e-07	2.4641e-06	protein_coding	HGNC Symbol	6	notch 3 [Source:HGNC Symbol;Acc:HGNC:7883]	8.61058	13.7834	10.416	4.11385	3.81206	2.33016	2.41283	2.51789	2.21494	Promoter (2-3kb)	19	15270444	15311792	41349	2354
4926	ENSG00000137497	NUMA1	6077.36	-1.60004	0.126687	-12.6299	0.329868	1.44444e-36	1.41229e-34	protein_coding	HGNC Symbol	34	nuclear mitotic apparatus protein 1 [Source:HGNC Symbol;Acc:HGNC:8059]	224.69	243.55	238.232	97.0494	127.333	90.549	50.5903	40.4326	39.0287	Promoter (<=1kb)	11	71728045	71781109	53065	319
5168	ENSG00000136960	ENPP2	69.8196	-2.92972	0.692824	-4.22867	0.13124	2.35073e-05	9.21115e-05	protein_coding	HGNC Symbol	9	ectonucleotide pyrophosphatase/phosphodiesterase 2 [Source:HGNC Symbol;Acc:HGNC:3357]	5.47387	2.19355	2.03396	0.483065	0.25149	0.12264	0.435101	0.292778	0	Promoter (1-2kb)	8	120569317	120605248	35932	-1959
5172	ENSG00000091137	SLC26A4	56.2762	1.66786	0.480504	3.47106	3.17743	0.000518401	0.00154486	protein_coding	HGNC Symbol	9	solute carrier family 26 member 4 [Source:HGNC Symbol;Acc:HGNC:8818]	0.507409	0.982187	0.608893	3.47495	1.90603	1.28772	2.31394	0.761223	0.814689	Promoter (<=1kb)	7	107333777	107358252	24476	0
5174	ENSG00000174827	PDZK1	38.5945	4.90127	0.593776	8.25442	29.8834	1.52647e-16	2.70193e-15	protein_coding	HGNC Symbol	7	PDZ domain containing 1 [Source:HGNC Symbol;Acc:HGNC:8821]	0.0307521	0.0818489	0.077731	0.342821	0.344144	0.0408799	0.909756	1.08328	1.14566	Promoter (1-2kb)	1	145727666	145764206	36541	-1017
5225	ENSG00000096088	PGC	1.78387	5.05838	2.2015	2.29769	33.3214	0.0215794	0.0432272	protein_coding	HGNC Symbol	4	progastricsin [Source:HGNC Symbol;Acc:HGNC:8890]	0	0	0	0.0779138	0	0.02044	0.0395546	0.0585556	0.0509181	Promoter (2-3kb)	6	41708576	41715139	6564	-2785
5292	ENSG00000137193	PIM1	262.224	-1.88391	0.235047	-8.01504	0.270949	1.10104e-15	1.79421e-14	protein_coding	HGNC Symbol	3	Pim-1 proto-oncogene, serine/threonine kinase [Source:HGNC Symbol;Acc:HGNC:8986]	10.8247	9.51084	11.6726	11.9052	6.75052	6.15243	2.27439	1.46389	1.14566	Promoter (<=1kb)	6	37140233	37143204	2972	378
5311	ENSG00000118762	PKD2	691.493	-1.39157	0.320792	-4.33792	0.38115	1.43836e-05	5.88016e-05	protein_coding	HGNC Symbol	7	polycystin 2, transient receptor potential cation channel [Source:HGNC Symbol;Acc:HGNC:9009]	28.2304	27.092	22.4124	13.0895	18.5441	9.6681	10.3831	3.63045	3.33513	Promoter (<=1kb)	4	88973143	88998931	25789	440
5311	ENSG00000118762	PKD2	691.493	-1.39157	0.320792	-4.33792	0.38115	1.43836e-05	5.88016e-05	protein_coding	HGNC Symbol	7	polycystin 2, transient receptor potential cation channel [Source:HGNC Symbol;Acc:HGNC:9009]	28.2304	27.092	22.4124	13.0895	18.5441	9.6681	10.3831	3.63045	3.33513	Promoter (<=1kb)	4	88964385	88998931	34547	319
5913	ENSG00000165917	RAPSN	23.6351	2.64259	0.61634	4.28755	6.24452	1.80652e-05	7.25878e-05	protein_coding	HGNC Symbol	5	receptor associated protein of the synapse [Source:HGNC Symbol;Acc:HGNC:9863]	0.215265	0.114588	0.168417	0.296072	0.582397	0.408799	0.336214	0.731945	0.611017	Promoter (<=1kb)	11	47460036	47470730	10695	-272
5930	ENSG00000122257	RBBP6	6089.99	1.7585	0.216515	8.12184	3.38346	4.59172e-16	7.8403e-15	protein_coding	HGNC Symbol	14	RB binding protein 6, ubiquitin ligase [Source:HGNC Symbol;Acc:HGNC:9889]	74.5738	73.1074	67.4057	69.1874	73.5542	51.6518	112.691	144.691	137.301	Promoter (<=1kb)	16	24550908	24584183	33276	961
6018	ENSG00000117000	RLF	2326.31	2.26638	0.275493	8.22662	4.81115	1.9257e-16	3.37943e-15	protein_coding	HGNC Symbol	1	rearranged L-myc fusion [Source:HGNC Symbol;Acc:HGNC:10025]	15.6067	23.4743	22.5549	20.4757	25.7711	16.4133	43.4112	61.337	56.3154	Promoter (1-2kb)	1	40627041	40706593	79553	1597
6092	ENSG00000185008	ROBO2	118.264	2.77128	0.301751	9.184	6.82715	4.1538e-20	1.11487e-18	protein_coding	HGNC Symbol	13	roundabout guidance receptor 2 [Source:HGNC Symbol;Acc:HGNC:10250]	0.722674	0.622052	0.971637	1.37128	2.01192	1.45124	2.98637	3.162	2.64774	Promoter (<=1kb)	3	77637902	77667330	29429	91
6092	ENSG00000185008	ROBO2	118.264	2.77128	0.301751	9.184	6.82715	4.1538e-20	1.11487e-18	protein_coding	HGNC Symbol	13	roundabout guidance receptor 2 [Source:HGNC Symbol;Acc:HGNC:10250]	0.722674	0.622052	0.971637	1.37128	2.01192	1.45124	2.98637	3.162	2.64774	Promoter (<=1kb)	3	77637902	77667330	29429	636
6540	ENSG00000010379	SLC6A13	210.217	11.9532	1.25606	9.51643	3965.17	1.79223e-21	5.2197e-20	protein_coding	HGNC Symbol	12	solute carrier family 6 member 13 [Source:HGNC Symbol;Acc:HGNC:11046]	0	0	0	0.358403	0.225017	0.22484	3.14459	6.324	7.71409	Promoter (1-2kb)	12	329787	369223	39437	1205
6543	ENSG00000118160	SLC8A2	55.0027	6.15498	0.840944	7.31913	71.2582	2.4958e-13	3.07316e-12	protein_coding	HGNC Symbol	7	solute carrier family 8 member A2 [Source:HGNC Symbol;Acc:HGNC:11069]	0	0.0491093	0.0647758	0.202576	0.225017	0.0408799	0.474655	2.04945	1.83305	Promoter (1-2kb)	19	47931279	47975307	44029	-1150
6708	ENSG00000163554	SPTA1	8.50467	-2.7872	1.07512	-2.59245	0.144867	0.0095296	0.0211246	protein_coding	HGNC Symbol	10	spectrin alpha, erythrocytic 1 [Source:HGNC Symbol;Acc:HGNC:11272]	0.261393	0.523833	0.362745	0.140245	0.0661815	0	0.0395546	0	0.0509181	Promoter (2-3kb)	1	158580496	158656506	76011	2642
6708	ENSG00000163554	SPTA1	8.50467	-2.7872	1.07512	-2.59245	0.144867	0.0095296	0.0211246	protein_coding	HGNC Symbol	10	spectrin alpha, erythrocytic 1 [Source:HGNC Symbol;Acc:HGNC:11272]	0.261393	0.523833	0.362745	0.140245	0.0661815	0	0.0395546	0	0.0509181	Promoter (<=1kb)	1	158580496	158656506	76011	291
6716	ENSG00000277893	SRD5A2	17.9999	8.391	1.44243	5.81727	335.692	5.98177e-09	4.20979e-08	protein_coding	HGNC Symbol	1	steroid 5 alpha-reductase 2 [Source:HGNC Symbol;Acc:HGNC:11285]	0	0	0	0.0311655	0.0264726	0	0.197773	0.878334	0.381885	Promoter (2-3kb)	2	31749656	31806040	56385	-2522
6717	ENSG00000075142	SRI	2278.34	-1.45665	0.14142	-10.3002	0.364338	7.03486e-25	2.91805e-23	protein_coding	HGNC Symbol	10	sorcin [Source:HGNC Symbol;Acc:HGNC:11292]	85.7983	82.1763	90.4918	25.6336	26.8829	19.9903	22.4868	16.1028	14.3589	Promoter (2-3kb)	7	87834432	87849399	14968	2283
6865	ENSG00000075073	TACR2	41.2008	2.35772	0.451717	5.21947	5.12561	1.79434e-07	1.01986e-06	protein_coding	HGNC Symbol	3	tachykinin receptor 2 [Source:HGNC Symbol;Acc:HGNC:11527]	0.307521	0.343765	0.3757	0.592145	0.489743	0.531439	0.73176	1.02472	1.1202	Promoter (<=1kb)	10	71163958	71176674	12717	408
6866	ENSG00000166863	TAC3	5.26354	4.80349	1.91648	2.50641	27.9251	0.0121965	0.0263051	protein_coding	HGNC Symbol	11	tachykinin 3 [Source:HGNC Symbol;Acc:HGNC:11521]	0	0	0.0259103	0	0.0264726	0.02044	0	0.117111	0.280049	Promoter (1-2kb)	12	57403781	57410344	6564	1136
7051	ENSG00000092295	TGM1	36.1454	1.63672	0.548351	2.98481	3.10959	0.00283758	0.00719292	protein_coding	HGNC Symbol	9	transglutaminase 1 [Source:HGNC Symbol;Acc:HGNC:11777]	0.307521	0.392875	0.634803	0.296072	0.370617	0.592759	0.454878	0.93689	0.865607	Promoter (2-3kb)	14	24718320	24732416	14097	-2515
7156	ENSG00000177302	TOP3A	2832.27	2.18402	0.188659	11.5766	4.54418	5.41749e-31	3.55951e-29	protein_coding	HGNC Symbol	20	DNA topoisomerase III alpha [Source:HGNC Symbol;Acc:HGNC:11992]	30.0755	23.1796	25.9621	31.7265	26.777	22.5862	63.1292	69.6519	63.9531	Promoter (<=1kb)	17	18177235	18202947	25713	0
7164	ENSG00000111907	TPD52L1	16.295	1.94416	0.815182	2.38495	3.84815	0.0170817	0.0353647	protein_coding	HGNC Symbol	17	TPD52 like 1 [Source:HGNC Symbol;Acc:HGNC:12006]	0.184513	0.245547	0.103641	1.29337	0.50298	0.388359	0.870201	0.0878334	0.25459	Promoter (1-2kb)	6	125524865	125584644	59780	1937
7188	ENSG00000082512	TRAF5	182.588	-1.89191	0.435539	-4.34383	0.269451	1.40018e-05	5.74697e-05	protein_coding	HGNC Symbol	7	TNF receptor associated factor 5 [Source:HGNC Symbol;Acc:HGNC:12035]	9.22563	6.4988	6.73668	2.07251	2.52813	1.8396	2.27439	0.380611	0.865607	Promoter (1-2kb)	1	211500148	211548286	48139	1497
7292	ENSG00000117586	TNFSF4	3692.4	1.7713	0.284475	6.22654	3.41361	4.76855e-10	3.86234e-09	protein_coding	HGNC Symbol	3	TNF superfamily member 4 [Source:HGNC Symbol;Acc:HGNC:11934]	26.6774	49.1257	52.7534	26.1946	32.2701	20.6239	120.088	63.7963	68.2302	Promoter (<=1kb)	1	173152870	173176471	23602	15
7571	ENSG00000167377	ZNF23	43.7316	2.34385	0.522142	4.48892	5.07656	7.15846e-06	3.10578e-05	protein_coding	HGNC Symbol	12	zinc finger protein 23 [Source:HGNC Symbol;Acc:HGNC:13023]	0.384401	0.196437	0.518206	0.342821	0.450034	0.388359	0.692206	1.14183	1.19657	Promoter (1-2kb)	16	71481506	71496273	14768	-1123
7571	ENSG00000167377	ZNF23	43.7316	2.34385	0.522142	4.48892	5.07656	7.15846e-06	3.10578e-05	protein_coding	HGNC Symbol	12	zinc finger protein 23 [Source:HGNC Symbol;Acc:HGNC:13023]	0.384401	0.196437	0.518206	0.342821	0.450034	0.388359	0.692206	1.14183	1.19657	Promoter (1-2kb)	16	71481503	71496117	14615	1270
7738	ENSG00000096654	ZNF184	176.72	-1.52664	0.320098	-4.76931	0.347084	1.84859e-06	8.86827e-06	protein_coding	HGNC Symbol	2	zinc finger protein 184 [Source:HGNC Symbol;Acc:HGNC:12975]	9.30251	6.22052	4.97478	6.01494	4.57976	3.20907	1.97773	1.11256	0.916525	Promoter (2-3kb)	6	27418521	27440884	22364	2497
7915	ENSG00000112294	ALDH5A1	38.2959	-2.40504	0.570271	-4.21736	0.188804	2.47179e-05	9.64411e-05	protein_coding	HGNC Symbol	5	aldehyde dehydrogenase 5 family member A1 [Source:HGNC Symbol;Acc:HGNC:408]	2.39866	1.50602	1.16596	1.40245	1.50894	0.756279	0.316437	0.0585556	0.152754	Promoter (1-2kb)	6	24495197	24537435	42239	1100
8013	ENSG00000119508	NR4A3	148.746	5.0717	0.366273	13.8468	33.6305	1.33039e-43	2.06161e-41	protein_coding	HGNC Symbol	4	nuclear receptor subfamily 4 group A member 3 [Source:HGNC Symbol;Acc:HGNC:7982]	0.184513	0.278286	0.207283	2.6179	1.97221	1.49212	6.54629	3.36695	2.95325	Promoter (2-3kb)	9	102584137	102596341	12205	-2599
8079	ENSG00000089693	MLF2	90842.7	4.71852	0.341718	13.8082	26.3279	2.27387e-43	3.45839e-41	protein_coding	HGNC Symbol	11	myeloid leukemia factor 2 [Source:HGNC Symbol;Acc:HGNC:7126]	173.749	166.317	174.441	1510.05	1265.74	1432.9	1314.66	2862.7	2980.49	Promoter (<=1kb)	12	6857158	6862636	5479	-673
8220	ENSG00000100056	ESS2	1847.88	1.38593	0.176744	7.84146	2.61341	4.45344e-15	6.81119e-14	protein_coding	HGNC Symbol	4	ess-2 splicing factor homolog [Source:HGNC Symbol;Acc:HGNC:16817]	32.5203	23.2287	23.695	33.7367	25.9829	24.6915	40.8995	36.4216	37.0174	Promoter (1-2kb)	22	19117792	19132190	14399	1807
8220	ENSG00000100056	ESS2	1847.88	1.38593	0.176744	7.84146	2.61341	4.45344e-15	6.81119e-14	protein_coding	HGNC Symbol	4	ess-2 splicing factor homolog [Source:HGNC Symbol;Acc:HGNC:16817]	32.5203	23.2287	23.695	33.7367	25.9829	24.6915	40.8995	36.4216	37.0174	Promoter (1-2kb)	22	19117792	19132190	14399	-1181
8349	ENSG00000184678	HIST2H2BE	1858.29	5.31021	0.244393	21.7282	39.6765	1.1109e-104	7.01833e-102	protein_coding	HGNC Symbol	1	histone cluster 2 H2B family member e [Source:HGNC Symbol;Acc:HGNC:4760]	3.29047	2.02985	1.80077	1.88551	1.95897	1.022	50.2541	51.9681	51.58	Promoter (1-2kb)	1	149856010	149858232	2223	1868
8470	ENSG00000154556	SORBS2	897.423	-1.88096	0.271519	-6.92756	0.271502	4.28176e-12	4.49694e-11	protein_coding	HGNC Symbol	65	sorbin and SH3 domain containing 2 [Source:HGNC Symbol;Acc:HGNC:24098]	34.3347	39.1238	35.7951	30.215	29.1066	22.9541	9.55244	3.74756	3.89523	Promoter (1-2kb)	4	186506598	186599976	93379	1568
8521	ENSG00000137270	GCM1	34.9805	9.37312	1.27185	7.36964	663.115	1.71086e-13	2.1684e-12	protein_coding	HGNC Symbol	1	glial cells missing transcription factor 1 [Source:HGNC Symbol;Acc:HGNC:4197]	0	0	0	0.514231	0.185308	0.24528	1.20642	0.644112	1.17112	Promoter (1-2kb)	6	52996389	53013624	17236	-1647
8522	ENSG00000007237	GAS7	44.6564	5.64423	0.846067	6.67114	50.0131	2.53816e-11	2.4016e-10	protein_coding	HGNC Symbol	19	growth arrest specific 7 [Source:HGNC Symbol;Acc:HGNC:4169]	0	0.0818489	0.0518206	1.30895	1.99868	1.24684	0.395546	1.69811	1.42571	Promoter (<=1kb)	17	9813926	9940064	126139	882
8600	ENSG00000120659	TNFSF11	5.46988	3.87102	1.46693	2.63886	14.6317	0.00831862	0.0187184	protein_coding	HGNC Symbol	5	TNF superfamily member 11 [Source:HGNC Symbol;Acc:HGNC:11926]	0	0	0.0518206	0	0.0264726	0	0.316437	0.0585556	0.101836	Promoter (<=1kb)	13	43136872	43182149	45278	734
8975	ENSG00000058056	USP13	536.522	-2.73191	0.198049	-13.7941	0.150527	2.76481e-43	4.09308e-41	protein_coding	HGNC Symbol	5	ubiquitin specific peptidase 13 [Source:HGNC Symbol;Acc:HGNC:12611]	26.4468	22.7213	23.2545	8.74193	10.642	7.15399	2.86771	1.63956	1.60392	Promoter (1-2kb)	3	179370933	179507189	136257	-1961
9026	ENSG00000130787	HIP1R	3935.41	-1.80739	0.176104	-10.2632	0.285708	1.0327e-24	4.19879e-23	protein_coding	HGNC Symbol	10	huntingtin interacting protein 1 related [Source:HGNC Symbol;Acc:HGNC:18415]	161.187	153.221	159.608	51.8438	56.7705	43.1283	36.766	20.0846	20.2654	Promoter (2-3kb)	12	123320039	123347507	27469	2988
9048	ENSG00000117407	ARTN	4.93511	6.53375	1.64495	3.97202	92.6523	7.12663e-05	0.000251855	protein_coding	HGNC Symbol	11	artemin [Source:HGNC Symbol;Acc:HGNC:727]	0	0	0	0.311655	0.145599	0.14308	0.118664	0.117111	0.178213	Promoter (<=1kb)	1	44401031	44402912	1882	0
9162	ENSG00000157680	DGKI	24.5436	2.4516	0.612365	4.00349	5.47022	6.24136e-05	0.000222677	protein_coding	HGNC Symbol	13	diacylglycerol kinase iota [Source:HGNC Symbol;Acc:HGNC:2855]	0.138384	0.180068	0.272058	0.420734	1.04567	0.22484	1.10753	0.292778	0.483722	Promoter (1-2kb)	7	137074385	137531609	457225	1563
9262	ENSG00000081320	STK17B	307.687	-1.58388	0.333638	-4.7473	0.333584	2.06148e-06	9.76975e-06	protein_coding	HGNC Symbol	5	serine/threonine kinase 17b [Source:HGNC Symbol;Acc:HGNC:11396]	18.3282	9.28167	8.47268	8.11861	6.40637	4.84427	2.74905	1.49317	2.41861	Promoter (2-3kb)	2	196998307	197041227	42921	-2499
9370	ENSG00000181092	ADIPOQ	4.3241	6.34213	1.68657	3.76037	81.128	0.000169664	0.000555381	protein_coding	HGNC Symbol	2	adiponectin, C1Q and collagen domain containing [Source:HGNC Symbol;Acc:HGNC:13633]	0	0	0	0.062331	0.185308	0.0817598	0.118664	0.146389	0.101836	Promoter (<=1kb)	3	186560463	186576252	15790	760
9378	ENSG00000179915	NRXN1	23.1478	8.76787	1.29038	6.79479	435.906	1.08468e-11	1.07749e-10	protein_coding	HGNC Symbol	67	neurexin 1 [Source:HGNC Symbol;Acc:HGNC:8008]	0	0	0	0.327238	0.264726	0.347479	0.692206	0.673389	0.611017	Promoter (1-2kb)	2	50145643	51256332	1110690	-1432
9404	ENSG00000110031	LPXN	1686.54	2.78649	0.256511	10.8631	6.89951	1.72844e-27	8.92812e-26	protein_coding	HGNC Symbol	5	leupaxin [Source:HGNC Symbol;Acc:HGNC:14061]	7.21136	11.7699	13.8361	16.9852	16.3865	15.8001	48.1775	41.9258	36.6865	Promoter (1-2kb)	11	58294344	58343390	49047	1034
9627	ENSG00000064692	SNCAIP	371.268	-1.83895	0.474379	-3.87653	0.279526	0.000105957	0.000363655	protein_coding	HGNC Symbol	22	synuclein alpha interacting protein [Source:HGNC Symbol;Acc:HGNC:11139]	20.0811	12.6866	12.5276	6.12402	6.60492	3.31127	5.47831	1.054	1.06928	Promoter (1-2kb)	5	121779851	121799794	19944	1435
9627	ENSG00000064692	SNCAIP	371.268	-1.83895	0.474379	-3.87653	0.279526	0.000105957	0.000363655	protein_coding	HGNC Symbol	22	synuclein alpha interacting protein [Source:HGNC Symbol;Acc:HGNC:11139]	20.0811	12.6866	12.5276	6.12402	6.60492	3.31127	5.47831	1.054	1.06928	Promoter (2-3kb)	5	121647386	121799794	152409	-2661
9627	ENSG00000064692	SNCAIP	371.268	-1.83895	0.474379	-3.87653	0.279526	0.000105957	0.000363655	protein_coding	HGNC Symbol	22	synuclein alpha interacting protein [Source:HGNC Symbol;Acc:HGNC:11139]	20.0811	12.6866	12.5276	6.12402	6.60492	3.31127	5.47831	1.054	1.06928	Promoter (<=1kb)	5	121726784	121787296	60513	-791
9627	ENSG00000064692	SNCAIP	371.268	-1.83895	0.474379	-3.87653	0.279526	0.000105957	0.000363655	protein_coding	HGNC Symbol	22	synuclein alpha interacting protein [Source:HGNC Symbol;Acc:HGNC:11139]	20.0811	12.6866	12.5276	6.12402	6.60492	3.31127	5.47831	1.054	1.06928	Promoter (1-2kb)	5	121726784	121787296	60513	-1993
9635	ENSG00000137975	CLCA2	10.4015	2.93806	0.851432	3.45072	7.66378	0.000559083	0.0016523	protein_coding	HGNC Symbol	3	chloride channel accessory 2 [Source:HGNC Symbol;Acc:HGNC:2016]	0.0615042	0.0327396	0.0906861	0.560979	0.330908	0.14308	0.355991	0.117111	0.330967	Promoter (1-2kb)	1	86889769	86922240	32472	-1690
9699	ENSG00000176406	RIMS2	114.301	2.45005	0.362955	6.7503	5.46436	1.47537e-11	1.43739e-10	protein_coding	HGNC Symbol	14	regulating synaptic membrane exocytosis 2 [Source:HGNC Symbol;Acc:HGNC:17283]	1.27621	0.75301	0.712534	0.747972	0.622106	0.388359	2.15573	3.07417	2.85141	Promoter (1-2kb)	8	104927723	104934236	6514	1310
9750	ENSG00000111913	RIPOR2	7.64221	3.40669	1.0064	3.38504	10.6051	0.000711686	0.00206321	protein_coding	HGNC Symbol	18	RHO family interacting cell polarization regulator 2 [Source:HGNC Symbol;Acc:HGNC:13872]	0.0307521	0.0163698	0.0518206	4.20734	2.85904	2.67763	0.158218	0.146389	0.280049	Promoter (<=1kb)	6	24840351	25042398	202048	161
9754	ENSG00000130052	STARD8	488.233	-1.54724	0.198358	-7.80024	0.342163	6.17909e-15	9.38057e-14	protein_coding	HGNC Symbol	5	StAR related lipid transfer domain containing 8 [Source:HGNC Symbol;Acc:HGNC:19161]	20.3118	18.9071	17.2692	27.1452	29.3846	22.4226	4.94433	2.57645	3.33513	Promoter (1-2kb)	23	67867511	67945684	78174	-1437
9914	ENSG00000064270	ATP2C2	13.7577	2.60402	0.697904	3.73121	6.0798	0.000190565	0.000618865	protein_coding	HGNC Symbol	15	ATPase secretory pathway Ca2+ transporting 2 [Source:HGNC Symbol;Acc:HGNC:29103]	0.123008	0.0982187	0.077731	0.498648	0.529452	0.286159	0.257105	0.322056	0.407345	Promoter (1-2kb)	16	84493212	84497793	4582	1189
9923	ENSG00000184677	ZBTB40	2189.42	1.65677	0.226521	7.31398	3.15309	2.59341e-13	3.16488e-12	protein_coding	HGNC Symbol	5	zinc finger and BTB domain containing 40 [Source:HGNC Symbol;Acc:HGNC:29045]	26.2623	27.1738	28.035	23.6858	33.2496	24.1192	40.0886	54.8959	44.7061	Promoter (<=1kb)	1	22828069	22838627	10559	440
9970	ENSG00000143257	NR1I3	22.4185	3.00052	0.810006	3.70432	8.00289	0.000211958	0.000681336	protein_coding	HGNC Symbol	35	nuclear receptor subfamily 1 group I member 3 [Source:HGNC Symbol;Acc:HGNC:7969]	0.0615042	0.0654791	0.246148	0.62331	0.330908	0.306599	0.316437	0.995445	0.330967	Promoter (1-2kb)	1	161199456	161206388	6933	1413
10090	ENSG00000111962	UST	28.9183	1.37666	0.505468	2.72354	2.59667	0.0064586	0.0149928	protein_coding	HGNC Symbol	3	uronyl 2-sulfotransferase [Source:HGNC Symbol;Acc:HGNC:17223]	0.384401	0.261916	0.582982	1.63619	1.66777	0.817598	0.573542	0.644112	0.560099	Promoter (1-2kb)	6	149068271	149398126	329856	1589
10157	ENSG00000008311	AASS	593.22	-1.45012	0.217001	-6.68253	0.365992	2.34854e-11	2.22989e-10	protein_coding	HGNC Symbol	7	aminoadipate-semialdehyde synthase [Source:HGNC Symbol;Acc:HGNC:17366]	28.6763	19.169	19.7825	7.86929	10.364	8.35994	6.24963	3.71828	3.92069	Promoter (2-3kb)	7	121713598	121784344	70747	2514
10290	ENSG00000072195	SPEG	109.134	-2.40797	0.323947	-7.43321	0.188421	1.05991e-13	1.38394e-12	protein_coding	HGNC Symbol	22	striated muscle enriched protein kinase [Source:HGNC Symbol;Acc:HGNC:16901]	5.55075	4.50169	4.24929	1.69852	1.95897	0.981118	0.73176	0.468445	0.305508	Promoter (<=1kb)	2	220301997	220331584	29588	0
10371	ENSG00000075213	SEMA3A	1774.79	2.91528	0.259242	11.2454	7.54371	2.43991e-29	1.4212e-27	protein_coding	HGNC Symbol	7	semaphorin 3A [Source:HGNC Symbol;Acc:HGNC:10723]	11.5013	10.182	10.4807	37.757	46.9492	36.0357	33.2654	51.0605	46.2336	Promoter (2-3kb)	7	83587659	83824217	236559	-2533
10520	ENSG00000121417	ZNF211	403.126	1.32459	0.257984	5.13438	2.50462	2.83077e-07	1.55721e-06	protein_coding	HGNC Symbol	12	zinc finger protein 211 [Source:HGNC Symbol;Acc:HGNC:13003]	7.44201	5.30381	5.10433	7.5888	6.72404	4.29239	7.23849	7.61223	9.41984	Promoter (1-2kb)	19	58144535	58154147	9613	-1969
10520	ENSG00000121417	ZNF211	403.126	1.32459	0.257984	5.13438	2.50462	2.83077e-07	1.55721e-06	protein_coding	HGNC Symbol	12	zinc finger protein 211 [Source:HGNC Symbol;Acc:HGNC:13003]	7.44201	5.30381	5.10433	7.5888	6.72404	4.29239	7.23849	7.61223	9.41984	Promoter (<=1kb)	19	58131794	58154147	22354	0
10891	ENSG00000109819	PPARGC1A	2126.8	15.2954	1.22455	12.4907	40214.6	8.39174e-36	7.49145e-34	protein_coding	HGNC Symbol	18	PPARG coactivator 1 alpha [Source:HGNC Symbol;Acc:HGNC:9237]	0	0	0	17.515	16.9954	28.7181	38.6449	66.4313	70.4706	Promoter (1-2kb)	4	23884304	23891700	7397	-1420
10891	ENSG00000109819	PPARGC1A	2126.8	15.2954	1.22455	12.4907	40214.6	8.39174e-36	7.49145e-34	protein_coding	HGNC Symbol	18	PPARG coactivator 1 alpha [Source:HGNC Symbol;Acc:HGNC:9237]	0	0	0	17.515	16.9954	28.7181	38.6449	66.4313	70.4706	Promoter (2-3kb)	4	23815313	23883734	68422	-2695
10891	ENSG00000109819	PPARGC1A	2126.8	15.2954	1.22455	12.4907	40214.6	8.39174e-36	7.49145e-34	protein_coding	HGNC Symbol	18	PPARG coactivator 1 alpha [Source:HGNC Symbol;Acc:HGNC:9237]	0	0	0	17.515	16.9954	28.7181	38.6449	66.4313	70.4706	Promoter (2-3kb)	4	23884304	23891700	7397	-2807
11013	ENSG00000158164	TMSB15A	26.5209	-5.49853	1.12827	-4.87341	0.0221196	1.09688e-06	5.47305e-06	protein_coding	HGNC Symbol	1	thymosin beta 15a [Source:HGNC Symbol;Acc:HGNC:30744]	1.01482	1.44054	1.51575	0.296072	0.317671	0.367919	0	0.0585556	0	Promoter (<=1kb)	23	101768610	101771699	3090	-810
22843	ENSG00000175175	PPM1E	32.3304	2.74423	0.52852	5.19229	6.70031	2.07727e-07	1.16614e-06	protein_coding	HGNC Symbol	1	protein phosphatase, Mg2+/Mn2+ dependent 1E [Source:HGNC Symbol;Acc:HGNC:19322]	0.199889	0.294656	0.155462	0.405152	0.317671	0.12264	0.711983	0.585556	1.06928	Promoter (1-2kb)	17	56833230	57062540	229311	-1622
22897	ENSG00000110274	CEP164	1035.84	-1.53641	0.171128	-8.97816	0.344741	2.75335e-19	6.75022e-18	protein_coding	HGNC Symbol	14	centrosomal protein 164 [Source:HGNC Symbol;Acc:HGNC:29182]	41.8843	37.9288	39.6558	13.3233	16.6116	12.3457	10.7589	6.11906	6.39022	Promoter (2-3kb)	11	117255313	117281417	26105	2715
22998	ENSG00000064042	LIMCH1	1332.43	-3.45763	0.731014	-4.7299	0.091023	2.24629e-06	1.05845e-05	protein_coding	HGNC Symbol	22	LIM and calponin homology domains 1 [Source:HGNC Symbol;Acc:HGNC:29191]	92.0256	56.1811	42.4282	28.906	44.249	19.3975	7.21872	1.11256	2.06218	Promoter (2-3kb)	4	41362804	41622311	259508	-2357
23034	ENSG00000020577	SAMD4A	5066.2	1.36439	0.144601	9.43551	2.57467	3.89112e-21	1.1174e-19	protein_coding	HGNC Symbol	13	sterile alpha motif domain containing 4A [Source:HGNC Symbol;Acc:HGNC:23023]	83.7072	68.9823	67.2502	41.902	42.6871	29.0656	137.828	90.3513	90.2268	Promoter (<=1kb)	14	55221506	55260033	38528	-193
23086	ENSG00000110723	EXPH5	11.4717	2.37558	0.723143	3.28508	5.18946	0.00101953	0.00285585	protein_coding	HGNC Symbol	6	exophilin 5 [Source:HGNC Symbol;Acc:HGNC:30578]	0.0922563	0.114588	0.077731	0.186993	0.238254	0.14308	0.237328	0.292778	0.280049	Promoter (<=1kb)	11	108376158	108408934	32777	-795
23101	ENSG00000053524	MCF2L2	39.1952	2.09246	0.459511	4.55367	4.26474	5.27189e-06	2.31912e-05	protein_coding	HGNC Symbol	14	MCF.2 cell line derived transforming sequence-like 2 [Source:HGNC Symbol;Acc:HGNC:30319]	0.445905	0.327396	0.3757	0.62331	0.675052	0.572319	0.810869	0.644112	1.22203	Promoter (1-2kb)	3	183016545	183118336	101792	-1387
23126	ENSG00000143442	POGZ	13151.3	3.13551	0.297783	10.5295	8.78784	6.31758e-26	2.99921e-24	protein_coding	HGNC Symbol	21	pogo transposable element derived with ZNF domain [Source:HGNC Symbol;Acc:HGNC:18801]	68.8385	72.1744	66.8486	116.715	106.01	143.448	212.962	374.434	386.901	Promoter (<=1kb)	1	151375200	151414681	39482	699
23228	ENSG00000154822	PLCL2	916.512	1.97486	0.170043	11.6139	3.93091	3.50152e-31	2.35721e-29	protein_coding	HGNC Symbol	4	phospholipase C like 2 [Source:HGNC Symbol;Acc:HGNC:9064]	10.2251	9.55995	8.97793	15.2555	16.0027	13.1633	21.0431	20.4066	20.7491	Promoter (2-3kb)	3	16844159	17052576	208418	-2287
23345	ENSG00000131018	SYNE1	2861.38	1.72488	0.225432	7.65144	3.30552	1.98734e-14	2.82389e-13	protein_coding	HGNC Symbol	40	spectrin repeat containing nuclear envelope protein 1 [Source:HGNC Symbol;Acc:HGNC:17089]	34.4885	37.1267	31.1831	36.4325	51.3172	37.957	52.489	68.5979	63.3421	Promoter (<=1kb)	6	152799051	152958534	159484	-59
23345	ENSG00000131018	SYNE1	2861.38	1.72488	0.225432	7.65144	3.30552	1.98734e-14	2.82389e-13	protein_coding	HGNC Symbol	40	spectrin repeat containing nuclear envelope protein 1 [Source:HGNC Symbol;Acc:HGNC:17089]	34.4885	37.1267	31.1831	36.4325	51.3172	37.957	52.489	68.5979	63.3421	Promoter (2-3kb)	6	152636357	152643098	6742	-2639
23348	ENSG00000088387	DOCK9	5844.39	-1.37651	0.226687	-6.07229	0.38515	1.26098e-09	9.67676e-09	protein_coding	HGNC Symbol	19	dedicator of cytokinesis 9 [Source:HGNC Symbol;Acc:HGNC:14132]	220.154	226.214	206.803	88.775	104.699	68.8622	76.0042	34.6649	34.5734	Promoter (2-3kb)	13	99445741	99498833	53093	2443
23348	ENSG00000088387	DOCK9	5844.39	-1.37651	0.226687	-6.07229	0.38515	1.26098e-09	9.67676e-09	protein_coding	HGNC Symbol	19	dedicator of cytokinesis 9 [Source:HGNC Symbol;Acc:HGNC:14132]	220.154	226.214	206.803	88.775	104.699	68.8622	76.0042	34.6649	34.5734	Promoter (2-3kb)	13	99461606	99520265	58660	2375
23348	ENSG00000088387	DOCK9	5844.39	-1.37651	0.226687	-6.07229	0.38515	1.26098e-09	9.67676e-09	protein_coding	HGNC Symbol	19	dedicator of cytokinesis 9 [Source:HGNC Symbol;Acc:HGNC:14132]	220.154	226.214	206.803	88.775	104.699	68.8622	76.0042	34.6649	34.5734	Promoter (1-2kb)	13	99445741	99502367	56627	-1471
23348	ENSG00000088387	DOCK9	5844.39	-1.37651	0.226687	-6.07229	0.38515	1.26098e-09	9.67676e-09	protein_coding	HGNC Symbol	19	dedicator of cytokinesis 9 [Source:HGNC Symbol;Acc:HGNC:14132]	220.154	226.214	206.803	88.775	104.699	68.8622	76.0042	34.6649	34.5734	Promoter (<=1kb)	13	99461606	99520265	58660	764
23397	ENSG00000121152	NCAPH	478.022	-2.58513	0.340118	-7.6007	0.166647	2.9454e-14	4.13037e-13	protein_coding	HGNC Symbol	7	non-SMC condensin I complex subunit H [Source:HGNC Symbol;Acc:HGNC:1112]	17.8516	20.6259	24.6278	2.39974	2.42224	2.84115	1.16686	2.19583	2.31677	Promoter (2-3kb)	2	97001484	97041274	39791	2748
23460	ENSG00000154262	ABCA6	487.614	-3.78568	0.74731	-5.06574	0.07251	4.06819e-07	2.1781e-06	protein_coding	HGNC Symbol	7	ATP binding cassette subfamily A member 6 [Source:HGNC Symbol;Acc:HGNC:36]	39.1628	17.5484	14.5486	1.88551	1.72072	0.429239	1.68107	0.234222	1.04382	Promoter (<=1kb)	17	67074847	67138015	63169	963
23476	ENSG00000141867	BRD4	14204.9	1.60343	0.253917	6.31479	3.03865	2.70533e-10	2.26492e-09	protein_coding	HGNC Symbol	12	bromodomain containing 4 [Source:HGNC Symbol;Acc:HGNC:13575]	159.696	188.531	194.768	169.073	159.524	121.086	233.491	335.611	322.744	Promoter (<=1kb)	19	15348301	15391262	42962	354
23504	ENSG00000060709	RIMBP2	4.1222	6.26328	1.83563	3.41206	76.813	0.000644737	0.00188778	protein_coding	HGNC Symbol	9	RIMS binding protein 2 [Source:HGNC Symbol;Acc:HGNC:30339]	0	0	0	0.747972	0.410326	0.347479	0.0395546	0.0878334	0.203672	Promoter (2-3kb)	12	130916192	131200826	284635	-2912
24137	ENSG00000090889	KIF4A	623.03	-2.79783	0.317684	-8.80696	0.143804	1.2859e-18	2.9014e-17	protein_coding	HGNC Symbol	2	kinesin family member 4A [Source:HGNC Symbol;Acc:HGNC:13339]	25.8164	28.0414	30.1596	2.63349	3.40173	2.63675	1.38441	2.78139	2.36769	Promoter (1-2kb)	23	69509933	69640774	130842	1468
25833	ENSG00000137709	POU2F3	6.97082	3.99677	1.31691	3.03496	15.9643	0.0024057	0.00622105	protein_coding	HGNC Symbol	7	POU class 2 homeobox 3 [Source:HGNC Symbol;Acc:HGNC:19864]	0	0.0654791	0	0.124662	0.119127	0.0408799	0.177996	0.146389	0.229131	Promoter (1-2kb)	11	120110903	120190653	79751	-1142
26022	ENSG00000006042	TMEM98	1796.12	-1.51981	0.24336	-6.24509	0.348733	4.23557e-10	3.45449e-09	protein_coding	HGNC Symbol	9	transmembrane protein 98 [Source:HGNC Symbol;Acc:HGNC:24529]	81.9082	62.9582	62.0941	20.8965	21.0193	15.9227	21.8539	9.54456	10.0818	Promoter (1-2kb)	17	31254928	31268667	13740	1267
26022	ENSG00000006042	TMEM98	1796.12	-1.51981	0.24336	-6.24509	0.348733	4.23557e-10	3.45449e-09	protein_coding	HGNC Symbol	9	transmembrane protein 98 [Source:HGNC Symbol;Acc:HGNC:24529]	81.9082	62.9582	62.0941	20.8965	21.0193	15.9227	21.8539	9.54456	10.0818	Promoter (2-3kb)	17	31254928	31268667	13740	2339
26022	ENSG00000006042	TMEM98	1796.12	-1.51981	0.24336	-6.24509	0.348733	4.23557e-10	3.45449e-09	protein_coding	HGNC Symbol	9	transmembrane protein 98 [Source:HGNC Symbol;Acc:HGNC:24529]	81.9082	62.9582	62.0941	20.8965	21.0193	15.9227	21.8539	9.54456	10.0818	Promoter (2-3kb)	17	31254928	31268667	13740	-2934
26471	ENSG00000176046	NUPR1	52.2528	-3.22791	0.84667	-3.81248	0.106734	0.000137582	0.000460832	protein_coding	HGNC Symbol	3	nuclear protein 1, transcriptional regulator [Source:HGNC Symbol;Acc:HGNC:29990]	5.98128	0.867598	0.660713	2.75815	0.35738	0.286159	0.21755	0.175667	0.0509181	Promoter (1-2kb)	16	28548662	28550495	1834	-1214
26523	ENSG00000092847	AGO1	2129.1	-1.46525	0.157472	-9.30485	0.362173	1.34184e-20	3.74847e-19	protein_coding	HGNC Symbol	3	argonaute RISC catalytic component 1 [Source:HGNC Symbol;Acc:HGNC:3262]	80.2783	82.4218	78.9876	23.6858	28.0345	19.6837	16.4745	15.9857	15.8355	Promoter (<=1kb)	1	36348810	36389899	41090	-731
26872	ENSG00000164647	STEAP1	614.466	-1.82199	0.390794	-4.66228	0.282831	3.12722e-06	1.43917e-05	protein_coding	HGNC Symbol	3	STEAP family member 1 [Source:HGNC Symbol;Acc:HGNC:11378]	40.439	18.285	16.3624	5.51629	3.32231	3.55655	7.11983	2.48861	2.64774	Promoter (2-3kb)	7	89783689	89791565	7877	-2237
29893	ENSG00000131470	PSMC3IP	319.802	1.60784	0.249533	6.4434	3.04796	1.16824e-10	1.02727e-09	protein_coding	HGNC Symbol	9	PSMC3 interacting protein [Source:HGNC Symbol;Acc:HGNC:17928]	3.21359	4.56717	4.40476	2.18159	1.77367	1.98268	9.07778	7.02667	4.91359	Promoter (1-2kb)	17	40724328	40729849	5522	-1945
29949	ENSG00000142224	IL19	2.26908	5.43343	2.41649	2.24848	43.2141	0.0245459	0.0484371	protein_coding	HGNC Symbol	4	interleukin 19 [Source:HGNC Symbol;Acc:HGNC:5990]	0	0	0	0	0	0	0.118664	0.0878334	0	Promoter (1-2kb)	1	207010006	207013959	3954	-1751
29953	ENSG00000072657	TRHDE	11.6054	7.75614	1.49384	5.19207	216.187	2.07972e-07	1.16672e-06	protein_coding	HGNC Symbol	7	thyrotropin releasing hormone degrading enzyme [Source:HGNC Symbol;Acc:HGNC:30748]	0	0	0	0.0311655	0	0.02044	0.118664	0.409889	0.407345	Promoter (2-3kb)	12	72666529	73059422	392894	-2353
30811	ENSG00000142149	HUNK	21.3563	6.13392	1.10157	5.56837	70.2253	2.57137e-08	1.65637e-07	protein_coding	HGNC Symbol	4	hormonally up-regulated Neu-associated kinase [Source:HGNC Symbol;Acc:HGNC:13326]	0	0.0491093	0	2.57115	1.42952	1.3286	0.29666	0.731945	0.687394	Promoter (2-3kb)	21	33245628	33376377	130750	2622
50507	ENSG00000086991	NOX4	654.324	-3.13148	0.276326	-11.3326	0.114112	9.05031e-30	5.54703e-28	protein_coding	HGNC Symbol	15	NADPH oxidase 4 [Source:HGNC Symbol;Acc:HGNC:7891]	23.0948	32.4122	35.0826	4.55016	4.54005	2.53456	2.88749	1.22967	1.75667	Promoter (2-3kb)	11	89057522	89322779	265258	2330
50509	ENSG00000080573	COL5A3	7.85075	4.36249	1.28364	3.39852	20.5703	0.00067751	0.00197459	protein_coding	HGNC Symbol	2	collagen type V alpha 3 chain [Source:HGNC Symbol;Acc:HGNC:14864]	0	0	0.0518206	0.0311655	0.10589	0.0817598	0.138441	0.175667	0.305508	Promoter (2-3kb)	19	10070237	10121147	50911	2054
50649	ENSG00000136002	ARHGEF4	46.613	3.74971	0.650031	5.7685	13.4516	7.99784e-09	5.53847e-08	protein_coding	HGNC Symbol	18	Rho guanine nucleotide exchange factor 4 [Source:HGNC Symbol;Acc:HGNC:684]	0.184513	0.196437	0.116596	0.732389	0.661815	1.00156	0.395546	1.66883	1.42571	Promoter (<=1kb)	2	131674224	131804836	130613	580
50939	ENSG00000081148	IMPG2	19.6551	1.3814	0.611966	2.25732	2.60522	0.0239882	0.0475308	protein_coding	HGNC Symbol	1	interphotoreceptor matrix proteoglycan 2 [Source:HGNC Symbol;Acc:HGNC:18362]	0.276769	0.376505	0.181372	0.327238	0.344144	0.2044	0.276882	0.497723	0.407345	Promoter (<=1kb)	3	100941390	101039241	97852	887
50939	ENSG00000081148	IMPG2	19.6551	1.3814	0.611966	2.25732	2.60522	0.0239882	0.0475308	protein_coding	HGNC Symbol	1	interphotoreceptor matrix proteoglycan 2 [Source:HGNC Symbol;Acc:HGNC:18362]	0.276769	0.376505	0.181372	0.327238	0.344144	0.2044	0.276882	0.497723	0.407345	Promoter (1-2kb)	3	100948224	100951835	3612	1435
51001	ENSG00000156469	MTERF3	230.357	-1.77677	0.348403	-5.09974	0.291836	3.40114e-07	1.84258e-06	protein_coding	HGNC Symbol	5	mitochondrial transcription termination factor 3 [Source:HGNC Symbol;Acc:HGNC:24258]	11.0554	8.234	8.5245	3.6152	3.04435	2.26884	2.82815	0.995445	0.865607	Promoter (<=1kb)	8	97251645	97269503	17859	82
51027	ENSG00000178096	BOLA1	158.397	-1.33113	0.310136	-4.2921	0.397456	1.76993e-05	7.1327e-05	protein_coding	HGNC Symbol	4	bolA family member 1 [Source:HGNC Symbol;Acc:HGNC:24263]	7.71877	4.89456	5.10433	2.69582	2.58108	3.08643	2.03706	0.995445	0.941984	Promoter (1-2kb)	1	149871155	149872348	1194	1224
51027	ENSG00000178096	BOLA1	158.397	-1.33113	0.310136	-4.2921	0.397456	1.76993e-05	7.1327e-05	protein_coding	HGNC Symbol	4	bolA family member 1 [Source:HGNC Symbol;Acc:HGNC:24263]	7.71877	4.89456	5.10433	2.69582	2.58108	3.08643	2.03706	0.995445	0.941984	Promoter (<=1kb)	1	149871155	149872348	1194	-485
51205	ENSG00000162836	ACP6	184.68	-1.719	0.347739	-4.94336	0.303759	7.67892e-07	3.93431e-06	protein_coding	HGNC Symbol	10	acid phosphatase 6, lysophosphatidic [Source:HGNC Symbol;Acc:HGNC:29609]	9.85604	5.74579	6.51645	1.94784	2.06486	1.65564	1.97773	1.20039	0.636476	Promoter (1-2kb)	1	147121946	147142634	20689	-1828
51271	ENSG00000165006	UBAP1	5853.43	2.00422	0.207972	9.63697	4.01172	5.58114e-22	1.6977e-20	protein_coding	HGNC Symbol	5	ubiquitin associated protein 1 [Source:HGNC Symbol;Acc:HGNC:12461]	64.2257	56.9177	59.7622	52.6697	47.4257	38.4271	115.242	142.963	135.9	Promoter (<=1kb)	9	34179003	34251097	72095	-838
51296	ENSG00000110446	SLC15A3	101.335	-1.85675	0.440984	-4.21047	0.276098	2.54838e-05	9.89592e-05	protein_coding	HGNC Symbol	9	solute carrier family 15 member 3 [Source:HGNC Symbol;Acc:HGNC:18068]	5.55075	3.45402	3.44607	9.25616	6.84317	6.78607	1.18664	0.234222	0.53464	Promoter (1-2kb)	11	60704555	60719257	14703	-1425
51661	ENSG00000079150	FKBP7	464.162	-1.64117	0.251312	-6.53041	0.320596	6.5589e-11	5.9261e-10	protein_coding	HGNC Symbol	8	FKBP prolyl isomerase 7 [Source:HGNC Symbol;Acc:HGNC:3723]	20.2656	16.599	17.7874	6.37335	6.35343	3.88359	5.30032	2.34222	2.36769	Promoter (1-2kb)	2	179328391	179343355	14965	1147
53335	ENSG00000119866	BCL11A	10.9612	-1.99636	0.848988	-2.35146	0.250631	0.0187	0.038238	protein_coding	HGNC Symbol	27	BCL11A, BAF complex component [Source:HGNC Symbol;Acc:HGNC:13221]	0.615042	0.294656	0.453431	0.249324	0.0926541	0.16352	0.0791092	0.0878334	0.025459	Promoter (<=1kb)	2	60684329	60763325	78997	0
54463	ENSG00000154153	RETREG1	95.395	4.43726	0.494495	8.97332	21.6644	2.87719e-19	7.01197e-18	protein_coding	HGNC Symbol	6	reticulophagy regulator 1 [Source:HGNC Symbol;Acc:HGNC:25964]	0.15376	0.376505	0.129552	4.08268	2.43548	2.49368	4.54878	2.19583	1.47662	Promoter (1-2kb)	5	16473147	16617167	144021	1973
54477	ENSG00000052126	PLEKHA5	358.311	-1.44863	0.274302	-5.28114	0.36637	1.28383e-07	7.44116e-07	protein_coding	HGNC Symbol	16	pleckstrin homology domain containing A5 [Source:HGNC Symbol;Acc:HGNC:30036]	14.6841	14.1435	11.9317	14.1491	12.7466	9.85206	4.60811	2.19583	1.75667	Promoter (<=1kb)	12	19358259	19529333	171075	-800
54551	ENSG00000254585	MAGEL2	7.54169	-3.82388	1.40207	-2.72731	0.0706152	0.0063853	0.0148436	protein_coding	HGNC Symbol	2	MAGE family member L2 [Source:HGNC Symbol;Acc:HGNC:6814]	0.184513	0.523833	0.388655	0.062331	0.119127	0.0408799	0.0395546	0	0	Promoter (2-3kb)	15	23888696	23892993	4298	-2676
54716	ENSG00000163817	SLC6A20	4.06511	6.27933	1.75401	3.57999	77.6725	0.000343607	0.00106132	protein_coding	HGNC Symbol	7	solute carrier family 6 member 20 [Source:HGNC Symbol;Acc:HGNC:30927]	0	0	0	0.0934965	0.0529452	0.0408799	0.197773	0.117111	0.0509181	Promoter (2-3kb)	3	45796941	45813831	16891	-2017
54762	ENSG00000178075	GRAMD1C	392.678	-2.24824	0.221309	-10.1588	0.21048	3.02642e-24	1.17245e-22	protein_coding	HGNC Symbol	15	GRAM domain containing 1C [Source:HGNC Symbol;Acc:HGNC:25252]	19.6198	14.8965	15.9348	5.75004	5.10921	3.14775	2.66994	1.37606	1.88397	Promoter (1-2kb)	3	113609472	113666021	56550	-1536
54762	ENSG00000178075	GRAMD1C	392.678	-2.24824	0.221309	-10.1588	0.21048	3.02642e-24	1.17245e-22	protein_coding	HGNC Symbol	15	GRAM domain containing 1C [Source:HGNC Symbol;Acc:HGNC:25252]	19.6198	14.8965	15.9348	5.75004	5.10921	3.14775	2.66994	1.37606	1.88397	Promoter (1-2kb)	3	113633305	113666021	32717	-1427
54820	ENSG00000072864	NDE1	997.935	-1.53313	0.162678	-9.42431	0.345528	4.32942e-21	1.23894e-19	protein_coding	HGNC Symbol	12	nudE neurodevelopment protein 1 [Source:HGNC Symbol;Acc:HGNC:17619]	42.7915	37.7323	34.5126	21.3172	17.1278	12.4275	9.21622	7.20234	5.83012	Promoter (<=1kb)	16	15758593	15790785	32193	0
54843	ENSG00000137501	SYTL2	121.897	3.57386	0.326932	10.9315	11.908	8.14622e-28	4.28878e-26	protein_coding	HGNC Symbol	30	synaptotagmin like 2 [Source:HGNC Symbol;Acc:HGNC:15585]	0.322897	0.638421	0.492296	2.58674	3.865	2.37104	3.34236	3.24984	3.00417	Promoter (1-2kb)	11	85405265	85437511	32247	1428
54852	ENSG00000137819	PAQR5	23.1871	1.88775	0.553352	3.41149	3.70059	0.000646094	0.00189108	protein_coding	HGNC Symbol	6	progestin and adipoQ receptor family member 5 [Source:HGNC Symbol;Acc:HGNC:29645]	0.384401	0.180068	0.207283	1.18429	0.807415	0.265719	0.711983	0.556278	0.330967	Promoter (1-2kb)	15	69591294	69699976	108683	1181
54933	ENSG00000158315	RHBDL2	42.7904	1.42153	0.447404	3.17727	2.67869	0.00148666	0.00401379	protein_coding	HGNC Symbol	3	rhomboid like 2 [Source:HGNC Symbol;Acc:HGNC:16083]	0.81493	0.409245	0.570027	1.16871	0.847124	0.674519	0.711983	0.93689	0.967443	Promoter (<=1kb)	1	39351479	39395185	43707	-969
54947	ENSG00000087253	LPCAT2	2350.11	-1.56722	0.214828	-7.29524	0.337458	2.98136e-13	3.60617e-12	protein_coding	HGNC Symbol	8	lysophosphatidylcholine acyltransferase 2 [Source:HGNC Symbol;Acc:HGNC:26032]	101.051	89.4608	82.1228	32.4277	38.6235	22.4431	26.7191	13.4092	12.5768	Promoter (2-3kb)	16	55542913	55620582	77670	-2265
54993	ENSG00000176371	ZSCAN2	394.466	-1.35061	0.334652	-4.03586	0.392127	5.44032e-05	0.000197182	protein_coding	HGNC Symbol	15	zinc finger and SCAN domain containing 2 [Source:HGNC Symbol;Acc:HGNC:20994]	15.4222	14.7492	13.8491	4.6125	6.59168	4.61943	6.11119	1.78595	2.18948	Promoter (2-3kb)	15	85144249	85150116	5868	-2927
55184	ENSG00000089091	DZANK1	116.359	1.8877	0.281325	6.71003	3.70046	1.94579e-11	1.86256e-10	protein_coding	HGNC Symbol	11	double zinc ribbon and ankyrin repeat domains 1 [Source:HGNC Symbol;Acc:HGNC:15858]	1.26084	1.37506	1.17892	1.29337	1.42952	1.10376	2.68971	3.04489	2.08764	Promoter (2-3kb)	20	18364011	18414409	50399	-2498
55432	ENSG00000180667	YOD1	1514.24	3.33364	0.218286	15.2719	10.0815	1.17735e-52	2.47937e-50	protein_coding	HGNC Symbol	2	YOD1 deubiquitinase [Source:HGNC Symbol;Acc:HGNC:25035]	7.04223	7.21907	6.86624	25.5401	23.1106	15.7388	33.7401	41.2524	40.8363	Promoter (2-3kb)	1	207217194	207224422	7229	2271
55553	ENSG00000110693	SOX6	15.9671	2.40402	0.753008	3.19256	5.29276	0.00141018	0.00383505	protein_coding	HGNC Symbol	17	SRY-box 6 [Source:HGNC Symbol;Acc:HGNC:16421]	0.138384	0.212807	0.0518206	0.28049	0.344144	0.286159	0.73176	0.234222	0.25459	Promoter (<=1kb)	11	15987995	16497935	509941	0
55604	ENSG00000079691	CARMIL1	354.017	-2.86526	0.825403	-3.47135	0.137236	0.000517845	0.00154376	protein_coding	HGNC Symbol	5	capping protein regulator and myosin 1 linker 1 [Source:HGNC Symbol;Acc:HGNC:21581]	20.4348	14.5691	13.4604	6.71617	6.63139	3.82227	3.2237	0.380611	0.483722	Promoter (2-3kb)	6	25527606	25557078	29473	-2543
55791	ENSG00000121931	LRIF1	1583.99	1.55355	0.156157	9.94866	2.93539	2.55603e-23	8.89519e-22	protein_coding	HGNC Symbol	3	ligand dependent nuclear receptor interacting factor 1 [Source:HGNC Symbol;Acc:HGNC:30299]	23.4638	19.6601	19.2643	31.9135	25.7181	17.006	35.6189	33.7866	31.5692	Promoter (1-2kb)	1	111489812	111506566	16755	-1044
55811	ENSG00000143199	ADCY10	16.6687	5.03304	0.963099	5.22588	32.7414	1.73327e-07	9.86509e-07	protein_coding	HGNC Symbol	5	adenylate cyclase 10 [Source:HGNC Symbol;Acc:HGNC:21285]	0.0461281	0.0327396	0	0.186993	0.291199	0.18396	0.257105	0.585556	0.483722	Promoter (<=1kb)	1	167778625	167803315	24691	933
55857	ENSG00000088970	KIZ	146.897	-1.68547	0.326025	-5.16975	0.310902	2.34409e-07	1.30434e-06	protein_coding	HGNC Symbol	15	kizuna centrosomal protein [Source:HGNC Symbol;Acc:HGNC:15865]	8.16468	4.61628	4.74159	3.6152	3.25613	2.73895	1.44374	0.761223	0.840148	Promoter (<=1kb)	20	21142512	21227258	84747	537
55892	ENSG00000085274	MYNN	982.167	1.69973	0.239738	7.08995	3.2484	1.34157e-12	1.50729e-11	protein_coding	HGNC Symbol	5	myoneurin [Source:HGNC Symbol;Acc:HGNC:14955]	13.2849	11.7535	10.7657	8.19653	8.52418	6.37727	17.4436	23.8614	21.6402	Promoter (<=1kb)	3	169496672	169502496	5825	395
55897	ENSG00000166823	MESP1	22.7635	-2.08743	0.624545	-3.34232	0.2353	0.000830812	0.00236926	protein_coding	HGNC Symbol	2	mesoderm posterior bHLH transcription factor 1 [Source:HGNC Symbol;Acc:HGNC:29658]	1.21471	0.654791	0.971637	0.560979	0.50298	0.613199	0.0988865	0.175667	0.101836	Promoter (2-3kb)	15	90293098	90294540	1443	-2380
56171	ENSG00000118997	DNAH7	9.55497	2.44305	0.889704	2.74591	5.43791	0.00603424	0.0141074	protein_coding	HGNC Symbol	8	dynein axonemal heavy chain 7 [Source:HGNC Symbol;Acc:HGNC:18661]	0.0307521	0.130958	0.0647758	0.0934965	0.172072	0.0817598	0.158218	0.204945	0.305508	Promoter (2-3kb)	2	196602427	196933536	331110	-2036
57495	ENSG00000174145	NWD2	7.4945	6.15829	1.48395	4.14993	71.4217	3.32571e-05	0.000125467	protein_coding	HGNC Symbol	1	NACHT and WD repeat domain containing 2 [Source:HGNC Symbol;Acc:HGNC:29229]	0	0.0163698	0	0.0934965	0.238254	0.1022	0.197773	0.146389	0.280049	Promoter (<=1kb)	4	37246690	37451087	204398	951
57556	ENSG00000092421	SEMA6A	226.961	-2.48572	0.364344	-6.82245	0.178535	8.95036e-12	9.05287e-11	protein_coding	HGNC Symbol	15	semaphorin 6A [Source:HGNC Symbol;Acc:HGNC:10738]	12.1163	8.97064	8.71882	6.01494	7.99473	2.53456	0.573542	1.34678	0.967443	Promoter (1-2kb)	5	115779251	115814414	35164	1494
57568	ENSG00000116991	SIPA1L2	1126.18	1.44862	0.167563	8.64523	2.72946	5.36964e-18	1.10252e-16	protein_coding	HGNC Symbol	6	signal induced proliferation associated 1 like 2 [Source:HGNC Symbol;Acc:HGNC:23800]	13.5002	16.5662	16.5567	40.9826	52.0981	38.7337	29.1517	20.6701	21.6147	Promoter (<=1kb)	1	232533712	232598163	64452	0
57608	ENSG00000165757	JCAD	4017.21	-1.74128	0.22969	-7.58102	0.299104	3.42852e-14	4.78072e-13	protein_coding	HGNC Symbol	3	junctional cadherin 5 associated [Source:HGNC Symbol;Acc:HGNC:29283]	187.08	153.025	140.084	44.6602	55.9896	32.6017	42.4025	18.7963	21.2074	Promoter (<=1kb)	10	30314795	30348488	33694	-779
57677	ENSG00000142065	ZFP14	87.0404	-1.535	0.381516	-4.02342	0.345079	5.73579e-05	0.000206943	protein_coding	HGNC Symbol	2	ZFP14 zinc finger protein [Source:HGNC Symbol;Acc:HGNC:29312]	4.45905	2.70101	2.92787	2.58674	3.45468	2.39148	0.751538	0.351334	0.814689	Promoter (<=1kb)	19	36825355	36858873	33519	0
57693	ENSG00000130803	ZNF317	3444.12	2.21794	0.227606	9.74468	4.6523	1.94386e-22	6.16406e-21	protein_coding	HGNC Symbol	6	zinc finger protein 317 [Source:HGNC Symbol;Acc:HGNC:13507]	32.9662	31.6755	29.6932	42.1669	39.828	33.5215	65.7793	86.6916	85.0077	Promoter (2-3kb)	19	9266601	9274091	7491	-2072
57822	ENSG00000158055	GRHL3	53.091	8.12336	1.15541	7.03074	278.852	2.05444e-12	2.25878e-11	protein_coding	HGNC Symbol	9	grainyhead like transcription factor 3 [Source:HGNC Symbol;Acc:HGNC:25839]	0	0	0.0259103	0.607727	0.754469	0.735839	0.810869	1.61028	1.90943	Promoter (<=1kb)	1	24649530	24681808	32279	856
58473	ENSG00000021300	PLEKHB1	24.6635	-1.83767	0.606831	-3.02831	0.279772	0.00245924	0.00633753	protein_coding	HGNC Symbol	22	pleckstrin homology domain containing B1 [Source:HGNC Symbol;Acc:HGNC:19079]	1.16858	1.14588	0.660713	0.389569	0.225017	0.2044	0.158218	0.234222	0.0763771	Promoter (1-2kb)	11	73359735	73373864	14130	1523
58473	ENSG00000021300	PLEKHB1	24.6635	-1.83767	0.606831	-3.02831	0.279772	0.00245924	0.00633753	protein_coding	HGNC Symbol	22	pleckstrin homology domain containing B1 [Source:HGNC Symbol;Acc:HGNC:19079]	1.16858	1.14588	0.660713	0.389569	0.225017	0.2044	0.158218	0.234222	0.0763771	Promoter (2-3kb)	11	73357223	73373864	16642	-2345
58484	ENSG00000091106	NLRC4	15.7592	2.39718	0.816206	2.93697	5.26771	0.00331431	0.00829271	protein_coding	HGNC Symbol	5	NLR family CARD domain containing 4 [Source:HGNC Symbol;Acc:HGNC:16412]	0.292145	0.0654791	0.0388655	0.109079	0.277962	0.0613199	0.355991	0.409889	0.356426	Promoter (1-2kb)	2	32449518	32490812	41295	-1080
64091	ENSG00000121577	POPDC2	21.7607	2.43142	0.832797	2.91958	5.39424	0.00350499	0.00870207	protein_coding	HGNC Symbol	9	popeye domain containing 2 [Source:HGNC Symbol;Acc:HGNC:17648]	0.246017	0.229177	0.0518206	0.109079	0.10589	0.286159	0.138441	0.644112	0.687394	Promoter (1-2kb)	3	119360908	119396243	35336	-1408
64091	ENSG00000121577	POPDC2	21.7607	2.43142	0.832797	2.91958	5.39424	0.00350499	0.00870207	protein_coding	HGNC Symbol	9	popeye domain containing 2 [Source:HGNC Symbol;Acc:HGNC:17648]	0.246017	0.229177	0.0518206	0.109079	0.10589	0.286159	0.138441	0.644112	0.687394	Promoter (<=1kb)	3	119360908	119384170	23263	675
79098	ENSG00000182795	C1orf116	246.621	10.3266	1.06315	9.71321	1284.14	2.64862e-22	8.36657e-21	protein_coding	HGNC Symbol	2	chromosome 1 open reading frame 116 [Source:HGNC Symbol;Acc:HGNC:28667]	0.015376	0.0163698	0	0.4519	0.0397089	0.0408799	5.7552	8.28562	6.61935	Promoter (<=1kb)	1	207191866	207206101	14236	-512
79670	ENSG00000083223	TUT7	1601.78	1.32965	0.223158	5.95833	2.51342	2.54824e-09	1.87365e-08	protein_coding	HGNC Symbol	7	terminal uridylyl transferase 7 [Source:HGNC Symbol;Acc:HGNC:25817]	23.3255	23.6871	23.4618	25.3376	26.9094	16.679	27.4707	36.4216	32.3584	Promoter (1-2kb)	9	88902648	88934585	31938	1482
79670	ENSG00000083223	TUT7	1601.78	1.32965	0.223158	5.95833	2.51342	2.54824e-09	1.87365e-08	protein_coding	HGNC Symbol	7	terminal uridylyl transferase 7 [Source:HGNC Symbol;Acc:HGNC:25817]	23.3255	23.6871	23.4618	25.3376	26.9094	16.679	27.4707	36.4216	32.3584	Promoter (<=1kb)	9	88902648	88969402	66755	451
79684	ENSG00000120458	MSANTD2	617.836	1.48953	0.240392	6.19625	2.80798	5.78244e-10	4.61079e-09	protein_coding	HGNC Symbol	8	Myb/SANT DNA binding domain containing 2 [Source:HGNC Symbol;Acc:HGNC:26266]	9.241	8.36496	7.50104	11.5624	9.31836	5.82539	10.7984	14.4925	12.9586	Promoter (1-2kb)	11	124636394	124646138	9745	1567
79772	ENSG00000175471	MCTP1	1774.62	-2.24919	0.354013	-6.35342	0.210342	2.10583e-10	1.78301e-09	protein_coding	HGNC Symbol	18	multiple C2 and transmembrane domain containing 1 [Source:HGNC Symbol;Acc:HGNC:26183]	107.74	61.3539	59.7103	23.9974	22.7003	17.2718	17.048	5.85556	5.24456	Promoter (1-2kb)	5	94134718	94417545	282828	-1267
79777	ENSG00000181513	ACBD4	142.254	-2.50295	0.329644	-7.5929	0.176416	3.12832e-14	4.37298e-13	protein_coding	HGNC Symbol	16	acyl-CoA binding domain containing 4 [Source:HGNC Symbol;Acc:HGNC:23337]	8.02629	5.76216	5.03956	2.91398	3.26937	2.30972	0.830647	0.673389	0.356426	Promoter (1-2kb)	17	43213014	43221543	8530	1640
79818	ENSG00000178935	ZNF552	114.898	-1.33979	0.298262	-4.49199	0.395079	7.05617e-06	3.06464e-05	protein_coding	HGNC Symbol	4	zinc finger protein 552 [Source:HGNC Symbol;Acc:HGNC:26135]	5.1356	4.07608	3.62745	1.85435	2.25017	1.81916	1.26575	0.614834	0.941984	Promoter (1-2kb)	19	58318450	58326281	7832	1389
79931	ENSG00000050730	TNIP3	48.6742	3.70758	0.986643	3.75778	13.0645	0.00017143	0.000560493	protein_coding	HGNC Symbol	7	TNFAIP3 interacting protein 3 [Source:HGNC Symbol;Acc:HGNC:19315]	0.353649	0.0654791	0.129552	1.41803	0.436798	0.470119	4.0939	0.117111	0.305508	Promoter (1-2kb)	4	122052564	122148621	96058	1566
80122	ENSG00000176601	MAP3K19	7.46337	5.29195	1.38453	3.8222	39.1774	0.000132265	0.00044502	protein_coding	HGNC Symbol	14	mitogen-activated protein kinase kinase kinase 19 [Source:HGNC Symbol;Acc:HGNC:26249]	0	0	0.0259103	0.109079	0.119127	0.0408799	0.237328	0.2635	0.127295	Promoter (2-3kb)	2	135722273	135782248	59976	-2453
80122	ENSG00000176601	MAP3K19	7.46337	5.29195	1.38453	3.8222	39.1774	0.000132265	0.00044502	protein_coding	HGNC Symbol	14	mitogen-activated protein kinase kinase kinase 19 [Source:HGNC Symbol;Acc:HGNC:26249]	0	0	0.0259103	0.109079	0.119127	0.0408799	0.237328	0.2635	0.127295	Promoter (<=1kb)	2	135722273	135782248	59976	0
80216	ENSG00000073331	ALPK1	128.937	-1.36584	0.380955	-3.58531	0.388008	0.000336674	0.00104108	protein_coding	HGNC Symbol	19	alpha kinase 1 [Source:HGNC Symbol;Acc:HGNC:20917]	6.70396	3.94512	3.91246	3.80219	3.81206	2.33016	1.83929	0.614834	0.763771	Promoter (2-3kb)	4	113303554	113363764	60211	2029
80705	ENSG00000135951	TSGA10	53.7294	2.10054	0.434627	4.83296	4.28869	1.3452e-06	6.61564e-06	protein_coding	HGNC Symbol	19	testis specific 10 [Source:HGNC Symbol;Acc:HGNC:14927]	0.507409	0.638421	0.414565	0.545396	1.04567	0.408799	0.870201	1.37606	1.37479	Promoter (1-2kb)	2	99613724	99771187	157464	1866
80824	ENSG00000111266	DUSP16	1341.19	1.60807	0.159143	10.1046	3.04844	5.27323e-24	2.00505e-22	protein_coding	HGNC Symbol	6	dual specificity phosphatase 16 [Source:HGNC Symbol;Acc:HGNC:17909]	20.1272	15.8787	15.4555	31.4148	30.1523	24.4666	37.2604	24.3299	26.2992	Promoter (1-2kb)	12	12626216	12674397	48182	-1703
81932	ENSG00000119431	HDHD3	148.164	-1.5858	0.304235	-5.21243	0.33314	1.86387e-07	1.05791e-06	protein_coding	HGNC Symbol	3	haloacid dehalogenase like hydrolase domain containing 3 [Source:HGNC Symbol;Acc:HGNC:28171]	6.65783	4.89456	5.79096	4.03593	4.52682	3.90403	1.7404	0.761223	0.763771	Promoter (2-3kb)	9	116135698	116138341	2644	2780
83667	ENSG00000130766	SESN2	6013.02	3.20094	0.291577	10.978	9.1956	4.87433e-28	2.61653e-26	protein_coding	HGNC Symbol	1	sestrin 2 [Source:HGNC Symbol;Acc:HGNC:20746]	34.6422	28.2051	28.6309	128.386	101.35	83.8447	101.359	169.401	177.577	Promoter (2-3kb)	1	28585963	28609002	23040	-2969
83690	ENSG00000121005	CRISPLD1	81.7084	-2.69211	0.376275	-7.15461	0.154738	8.39088e-13	9.63836e-12	protein_coding	HGNC Symbol	5	cysteine rich secretory protein LCCL domain containing 1 [Source:HGNC Symbol;Acc:HGNC:18206]	4.70507	3.02841	3.27766	11.8741	14.507	11.0171	0.375769	0.2635	0.305508	Promoter (2-3kb)	8	75912401	75946793	34393	-2832
83894	ENSG00000137473	TTC29	38.3086	4.52021	0.558689	8.09075	22.9467	5.92972e-16	9.97967e-15	protein_coding	HGNC Symbol	9	tetratricopeptide repeat domain 29 [Source:HGNC Symbol;Acc:HGNC:29936]	0.107632	0.0654791	0.077731	0.4519	0.291199	0.0817598	1.7404	0.731945	0.814689	Promoter (1-2kb)	4	147628637	147867034	238398	-1445
83990	ENSG00000136492	BRIP1	201.9	-1.70598	0.371525	-4.59183	0.306513	4.39385e-06	1.96123e-05	protein_coding	HGNC Symbol	6	BRCA1 interacting protein C-terminal helicase 1 [Source:HGNC Symbol;Acc:HGNC:20473]	8.87198	7.43188	7.55286	1.52711	1.77367	1.24684	0.771315	1.90306	1.27295	Promoter (<=1kb)	17	59762133	59858366	96234	0
84059	ENSG00000164199	ADGRV1	18.9225	1.9266	0.654442	2.94388	3.80159	0.00324121	0.00814317	protein_coding	HGNC Symbol	37	adhesion G protein-coupled receptor V1 [Source:HGNC Symbol;Acc:HGNC:17416]	0.123008	0.245547	0.246148	1.19987	1.0589	0.981118	0.810869	0.322056	0.229131	Promoter (1-2kb)	5	89989707	90055782	66076	1526
84059	ENSG00000164199	ADGRV1	18.9225	1.9266	0.654442	2.94388	3.80159	0.00324121	0.00814317	protein_coding	HGNC Symbol	37	adhesion G protein-coupled receptor V1 [Source:HGNC Symbol;Acc:HGNC:17416]	0.123008	0.245547	0.246148	1.19987	1.0589	0.981118	0.810869	0.322056	0.229131	Promoter (<=1kb)	5	89854617	90460033	605417	-404
84059	ENSG00000164199	ADGRV1	18.9225	1.9266	0.654442	2.94388	3.80159	0.00324121	0.00814317	protein_coding	HGNC Symbol	37	adhesion G protein-coupled receptor V1 [Source:HGNC Symbol;Acc:HGNC:17416]	0.123008	0.245547	0.246148	1.19987	1.0589	0.981118	0.810869	0.322056	0.229131	Promoter (1-2kb)	5	90076898	90460033	383136	-1558
84077	ENSG00000131379	C3orf20	15.0682	2.94719	0.983148	2.99771	7.71244	0.00272021	0.00693391	protein_coding	HGNC Symbol	4	chromosome 3 open reading frame 20 [Source:HGNC Symbol;Acc:HGNC:25320]	0.015376	0.114588	0.129552	0.0311655	0.0397089	0.0408799	0.0791092	0.527	0.458263	Promoter (2-3kb)	3	14755514	14814540	59027	2312
84532	ENSG00000154930	ACSS1	228.605	-1.84975	0.421552	-4.38795	0.27744	1.14424e-05	4.75831e-05	protein_coding	HGNC Symbol	5	acyl-CoA synthetase short chain family member 1 [Source:HGNC Symbol;Acc:HGNC:16091]	13.577	7.31729	7.13829	1.30895	1.24421	1.28772	2.88749	0.849056	0.78923	Promoter (1-2kb)	20	24986866	25013308	26443	1976
84660	ENSG00000130783	CCDC62	24.9169	2.89308	0.620879	4.65965	7.42856	3.16742e-06	1.45393e-05	protein_coding	HGNC Symbol	6	coiled-coil domain containing 62 [Source:HGNC Symbol;Acc:HGNC:30723]	0.138384	0.114588	0.194327	0.0934965	0.0661815	0.0408799	0.375769	0.878334	0.560099	Promoter (2-3kb)	12	123261105	123311927	50823	2109
84699	ENSG00000060566	CREB3L3	3.32428	3.40395	1.49839	2.27174	10.585	0.0231024	0.0459529	protein_coding	HGNC Symbol	5	cAMP responsive element binding protein 3 like 3 [Source:HGNC Symbol;Acc:HGNC:18855]	0.0307521	0	0.0129552	0.0311655	0.0397089	0.0613199	0.0593319	0.117111	0.0763771	Promoter (1-2kb)	19	4153598	4173051	19454	1030
84861	ENSG00000099910	KLHL22	437.277	-1.60839	0.262823	-6.11967	0.327963	9.37667e-10	7.30651e-09	protein_coding	HGNC Symbol	12	kelch like family member 22 [Source:HGNC Symbol;Acc:HGNC:25888]	23.5715	13.6688	14.147	7.77579	9.39778	7.84895	4.35101	2.43006	2.6732	Promoter (2-3kb)	22	20795806	20850170	54365	2455
84891	ENSG00000130182	ZSCAN10	5.91077	3.60563	1.43069	2.52021	12.1731	0.0117284	0.0254292	protein_coding	HGNC Symbol	10	zinc finger and SCAN domain containing 10 [Source:HGNC Symbol;Acc:HGNC:12997]	0	0	0.0647758	0.202576	0.198545	0.24528	0.118664	0.2635	0.0763771	Promoter (<=1kb)	16	3138895	3143237	4343	-304
84891	ENSG00000130182	ZSCAN10	5.91077	3.60563	1.43069	2.52021	12.1731	0.0117284	0.0254292	protein_coding	HGNC Symbol	10	zinc finger and SCAN domain containing 10 [Source:HGNC Symbol;Acc:HGNC:12997]	0	0	0.0647758	0.202576	0.198545	0.24528	0.118664	0.2635	0.0763771	Promoter (1-2kb)	16	3138895	3142861	3967	1393
84891	ENSG00000130182	ZSCAN10	5.91077	3.60563	1.43069	2.52021	12.1731	0.0117284	0.0254292	protein_coding	HGNC Symbol	10	zinc finger and SCAN domain containing 10 [Source:HGNC Symbol;Acc:HGNC:12997]	0	0	0.0647758	0.202576	0.198545	0.24528	0.118664	0.2635	0.0763771	Promoter (1-2kb)	16	3138895	3149293	10399	1118
90293	ENSG00000003096	KLHL13	442.2	-2.06872	0.234058	-8.83849	0.23837	9.70185e-19	2.21953e-17	protein_coding	HGNC Symbol	9	kelch like family member 13 [Source:HGNC Symbol;Acc:HGNC:22931]	21.0806	17.794	16.6603	6.2331	7.45204	4.70119	3.77747	1.96161	1.75667	Promoter (<=1kb)	23	117031776	117119376	87601	869
90780	ENSG00000163348	PYGO2	3011.79	2.22175	0.297435	7.46969	4.66459	8.0381e-14	1.07345e-12	protein_coding	HGNC Symbol	3	pygopus family PHD finger 2 [Source:HGNC Symbol;Acc:HGNC:30257]	32.9047	24.4073	25.2367	20.8653	23.2694	13.9196	46.4173	78.8158	79.8395	Promoter (1-2kb)	1	154929502	154934258	4757	1882
92400	ENSG00000119446	RBM18	537.065	-1.37145	0.215946	-6.35089	0.386504	2.14076e-10	1.81072e-09	protein_coding	HGNC Symbol	3	RNA binding motif protein 18 [Source:HGNC Symbol;Acc:HGNC:28413]	25.9394	17.2701	17.1008	6.91874	7.63735	4.37415	5.47831	3.60117	3.92069	Promoter (<=1kb)	9	125001834	125027143	25310	-599
114880	ENSG00000079156	OSBPL6	294.626	-1.67777	0.276987	-6.05721	0.312566	1.38506e-09	1.05818e-08	protein_coding	HGNC Symbol	9	oxysterol binding protein like 6 [Source:HGNC Symbol;Acc:HGNC:16388]	10.5018	12.572	11.4912	8.24328	8.57713	6.60211	1.76018	2.60572	1.60392	Promoter (2-3kb)	2	179184971	179264160	79190	2717
116071	ENSG00000168062	BATF2	39.8663	-2.1113	0.553186	-3.81662	0.231438	0.00013529	0.000453525	protein_coding	HGNC Symbol	5	basic leucine zipper ATF-like transcription factor 2 [Source:HGNC Symbol;Acc:HGNC:25163]	2.76769	1.26047	1.03641	1.86993	2.18399	1.71696	0.237328	0.204945	0.203672	Promoter (2-3kb)	11	64755417	64757745	2329	-2743
117144	ENSG00000175294	CATSPER1	21.6738	-1.34819	0.583293	-2.31135	0.392783	0.0208136	0.0419078	protein_coding	HGNC Symbol	2	cation channel sperm associated 1 [Source:HGNC Symbol;Acc:HGNC:17116]	0.845682	0.605682	0.932772	1.57386	0.767706	0.919798	0.138441	0.234222	0.152754	Promoter (<=1kb)	11	65784223	65793988	9766	-3
117144	ENSG00000175294	CATSPER1	21.6738	-1.34819	0.583293	-2.31135	0.392783	0.0208136	0.0419078	protein_coding	HGNC Symbol	2	cation channel sperm associated 1 [Source:HGNC Symbol;Acc:HGNC:17116]	0.845682	0.605682	0.932772	1.57386	0.767706	0.919798	0.138441	0.234222	0.152754	Promoter (<=1kb)	11	65784223	65793988	9766	112
117248	ENSG00000131386	GALNT15	402.44	-6.02098	0.96929	-6.21174	0.0153994	5.24011e-10	4.23592e-09	protein_coding	HGNC Symbol	7	polypeptide N-acetylgalactosaminyltransferase 15 [Source:HGNC Symbol;Acc:HGNC:21531]	47.2198	9.77276	5.84278	0.670058	0.595634	0.0817598	0.29666	0.117111	0.127295	Promoter (2-3kb)	3	16216184	16271253	55070	-2606
117289	ENSG00000164691	TAGAP	65.2073	6.35695	0.718858	8.84313	81.966	9.3078e-19	2.14132e-17	protein_coding	HGNC Symbol	4	T cell activation RhoGTPase activating protein [Source:HGNC Symbol;Acc:HGNC:15669]	0.0615042	0.0654791	0	0.654476	0.489743	0.367919	1.06797	2.34222	1.88397	Promoter (2-3kb)	6	159459944	159466184	6241	-2089
122509	ENSG00000165948	IFI27L1	223.223	-1.47925	0.266449	-5.55171	0.358675	2.82881e-08	1.80943e-07	protein_coding	HGNC Symbol	13	interferon alpha inducible protein 27 like 1 [Source:HGNC Symbol;Acc:HGNC:19754]	9.8868	7.15359	8.56336	5.46955	5.01656	4.55811	2.6106	1.17111	1.40025	Promoter (<=1kb)	14	94547639	94569060	21422	780
124739	ENSG00000154914	USP43	8.73842	5.467	1.33336	4.10018	44.2315	4.12824e-05	0.000152795	protein_coding	HGNC Symbol	6	ubiquitin specific peptidase 43 [Source:HGNC Symbol;Acc:HGNC:20072]	0.0307521	0	0	0.0155828	0.0264726	0.1022	0.197773	0.2635	0.25459	Promoter (1-2kb)	17	9604436	9633003	28568	-1295
127845	ENSG00000174567	GOLT1A	8.73071	4.50147	1.09004	4.12965	22.6506	3.63319e-05	0.000136005	protein_coding	HGNC Symbol	2	golgi transport 1A [Source:HGNC Symbol;Acc:HGNC:24766]	0.0307521	0	0.0259103	0.0311655	0.0794178	0.0408799	0.395546	0.175667	0.178213	Promoter (1-2kb)	1	204167291	204183220	15930	-1266
131474	ENSG00000163528	CHCHD4	232.721	-1.59336	0.21901	-7.27528	0.331398	3.45692e-13	4.13873e-12	protein_coding	HGNC Symbol	3	coiled-coil-helix-coiled-coil-helix domain containing 4 [Source:HGNC Symbol;Acc:HGNC:26467]	9.79454	8.9379	8.43381	2.85164	2.84581	2.43236	2.31394	1.43461	1.29841	Promoter (2-3kb)	3	14153577	14166371	12795	2206
132864	ENSG00000137449	CPEB2	1941.27	2.87091	0.302353	9.4952	7.31524	2.19783e-21	6.3559e-20	protein_coding	HGNC Symbol	9	cytoplasmic polyadenylation element binding protein 2 [Source:HGNC Symbol;Acc:HGNC:21745]	13.0389	12.3428	10.7787	15.2088	18.2264	12.3253	31.0899	56.6525	53.2858	Promoter (2-3kb)	4	15004298	15071777	67480	2347
136306	ENSG00000157703	SVOPL	4.82827	5.54652	1.60932	3.4465	46.7378	0.000567909	0.00167497	protein_coding	HGNC Symbol	7	SVOP like [Source:HGNC Symbol;Acc:HGNC:27034]	0.015376	0	0	0.0467483	0.0529452	0.0408799	0.237328	0.0878334	0.101836	Promoter (2-3kb)	7	138279030	138348969	69940	2510
137209	ENSG00000180938	ZNF572	13.0841	-2.13369	0.937335	-2.27633	0.227874	0.022826	0.0454693	protein_coding	HGNC Symbol	1	zinc finger protein 572 [Source:HGNC Symbol;Acc:HGNC:26758]	0.922563	0.458354	0.310924	0.233741	0.238254	0.12264	0.158218	0.0585556	0	Promoter (2-3kb)	8	125985539	125991630	6092	2149
138639	ENSG00000158079	PTPDC1	734.261	2.44734	0.194662	12.5723	5.4541	3.00006e-36	2.79994e-34	protein_coding	HGNC Symbol	5	protein tyrosine phosphatase domain containing 1 [Source:HGNC Symbol;Acc:HGNC:30184]	6.05816	5.81127	5.778	6.685	7.04172	5.78451	26.2445	14.434	14.1298	Promoter (<=1kb)	9	96793076	96872138	79063	-616
139105	ENSG00000177324	BEND2	4.13436	6.27856	1.79088	3.50585	77.6309	0.000455155	0.00137081	protein_coding	HGNC Symbol	2	BEN domain containing 2 [Source:HGNC Symbol;Acc:HGNC:28509]	0	0	0	0	0	0	0.0791092	0.0585556	0.203672	Promoter (<=1kb)	23	18181051	18239024	57974	423
139378	ENSG00000156920	ADGRG4	16.5884	4.56697	0.836458	5.45989	23.7025	4.7642e-08	2.95308e-07	protein_coding	HGNC Symbol	3	adhesion G protein-coupled receptor G4 [Source:HGNC Symbol;Acc:HGNC:18992]	0	0.0654791	0.0388655	0.124662	0.172072	0.0408799	0.632874	0.380611	0.381885	Promoter (<=1kb)	23	135388180	135499047	110868	-838
140876	ENSG00000042062	RIPOR3	39.7172	3.04543	0.549556	5.54163	8.25595	2.99668e-08	1.90199e-07	protein_coding	HGNC Symbol	6	RIPOR family member 3 [Source:HGNC Symbol;Acc:HGNC:16168]	0.15376	0.376505	0.142507	0.373986	0.780942	0.2044	1.7404	0.702667	0.738312	Promoter (1-2kb)	20	49202647	49307916	105270	-1122
140883	ENSG00000275004	ZNF280B	85.4189	-2.29463	0.333837	-6.87351	0.20382	6.26421e-12	6.46331e-11	protein_coding	HGNC Symbol	3	zinc finger protein 280B [Source:HGNC Symbol;Acc:HGNC:23022]	3.2751	3.69957	3.99019	1.52711	1.77367	1.28772	0.51421	0.380611	0.356426	Promoter (2-3kb)	22	22838772	22863505	24734	2455
142679	ENSG00000162999	DUSP19	35.2243	-2.43267	0.55027	-4.42087	0.185222	9.83039e-06	4.14188e-05	protein_coding	HGNC Symbol	3	dual specificity phosphatase 19 [Source:HGNC Symbol;Acc:HGNC:18894]	2.04501	1.47328	1.07528	0.436317	0.277962	0.490559	0.118664	0.204945	0.152754	Promoter (<=1kb)	2	183943287	183964722	21436	303
143279	ENSG00000165338	HECTD2	456.139	1.82931	0.230628	7.93185	3.55367	2.15905e-15	3.40351e-14	protein_coding	HGNC Symbol	6	HECT domain E3 ubiquitin protein ligase 2 [Source:HGNC Symbol;Acc:HGNC:26736]	6.94997	4.30525	4.32702	6.70058	5.74456	3.67919	10.8775	10.1887	9.39438	Promoter (2-3kb)	10	93170096	93274520	104425	2830
143872	ENSG00000165895	ARHGAP42	161.343	1.8744	0.24227	7.73683	3.66649	1.01923e-14	1.49748e-13	protein_coding	HGNC Symbol	9	Rho GTPase activating protein 42 [Source:HGNC Symbol;Acc:HGNC:26545]	2.21415	1.45691	1.69713	7.82254	9.19923	6.33639	4.37078	3.54261	3.05508	Promoter (2-3kb)	11	100845190	100861656	16467	-2869
143872	ENSG00000165895	ARHGAP42	161.343	1.8744	0.24227	7.73683	3.66649	1.01923e-14	1.49748e-13	protein_coding	HGNC Symbol	9	Rho GTPase activating protein 42 [Source:HGNC Symbol;Acc:HGNC:26545]	2.21415	1.45691	1.69713	7.82254	9.19923	6.33639	4.37078	3.54261	3.05508	Promoter (1-2kb)	11	100845190	100861656	16467	-1659
144108	ENSG00000179119	SPTY2D1	1732.43	1.49154	0.191609	7.78432	2.8119	7.0089e-15	1.05622e-13	protein_coding	HGNC Symbol	3	SPT2 chromatin protein domain containing 1 [Source:HGNC Symbol;Acc:HGNC:26818]	26.0931	21.1334	23.1897	25.7739	25.4005	17.5988	34.7487	39.9349	33.6568	Promoter (2-3kb)	11	18633712	18656020	22309	-2834
146177	ENSG00000175267	VWA3A	33.7549	6.44843	0.873156	7.38519	87.3313	1.52231e-13	1.94142e-12	protein_coding	HGNC Symbol	8	von Willebrand factor A domain containing 3A [Source:HGNC Symbol;Acc:HGNC:27088]	0.0461281	0	0.0129552	0.109079	0.10589	0.0817598	0.988865	1.20039	0.661935	Promoter (1-2kb)	16	22103863	22149833	45971	-1556
147968	ENSG00000182472	CAPN12	17.4177	1.44146	0.586191	2.45903	2.71596	0.0139312	0.0295651	protein_coding	HGNC Symbol	12	calpain 12 [Source:HGNC Symbol;Acc:HGNC:13249]	0.184513	0.196437	0.336834	0.4519	0.397089	0.388359	0.415323	0.351334	0.330967	Promoter (2-3kb)	19	39220832	39226317	5486	-2986
147968	ENSG00000182472	CAPN12	17.4177	1.44146	0.586191	2.45903	2.71596	0.0139312	0.0295651	protein_coding	HGNC Symbol	12	calpain 12 [Source:HGNC Symbol;Acc:HGNC:13249]	0.184513	0.196437	0.336834	0.4519	0.397089	0.388359	0.415323	0.351334	0.330967	Promoter (1-2kb)	19	39220832	39235114	14283	1805
152110	ENSG00000163491	NEK10	96.4607	2.98359	0.421776	7.07388	7.90953	1.50664e-12	1.67898e-11	protein_coding	HGNC Symbol	13	NIMA related kinase 10 [Source:HGNC Symbol;Acc:HGNC:18592]	0.799554	0.294656	0.582982	0.4519	0.714761	0.0817598	2.01729	2.108	3.05508	Promoter (1-2kb)	3	27203757	27333077	129321	1996
154865	ENSG00000164675	IQUB	22.4169	1.8647	0.613657	3.03866	3.64191	0.00237632	0.0061528	protein_coding	HGNC Symbol	6	IQ motif and ubiquitin domain containing [Source:HGNC Symbol;Acc:HGNC:21995]	0.184513	0.212807	0.336834	0.327238	0.291199	0.265719	0.336214	0.409889	0.712853	Promoter (<=1kb)	7	123092236	123174718	82483	192
157753	ENSG00000164841	TMEM74	11.894	2.25665	0.794107	2.84175	4.7788	0.00448673	0.0108508	protein_coding	HGNC Symbol	2	transmembrane protein 74 [Source:HGNC Symbol;Acc:HGNC:26409]	0.15376	0.0327396	0.129552	0.155828	0	0.0408799	0.237328	0.234222	0.356426	Promoter (1-2kb)	8	109619079	109799770	180692	1966
158326	ENSG00000164946	FREM1	20.8709	1.87387	0.57396	3.26481	3.66515	0.00109536	0.00303822	protein_coding	HGNC Symbol	9	FRAS1 related extracellular matrix 1 [Source:HGNC Symbol;Acc:HGNC:23399]	0.15376	0.245547	0.285014	0.373986	0.595634	0.551879	0.454878	0.351334	0.585558	Promoter (1-2kb)	9	14734664	14774159	39496	-1135
158521	ENSG00000176988	FMR1NB	7.35193	7.12159	1.49127	4.77553	139.256	1.79232e-06	8.63361e-06	protein_coding	HGNC Symbol	2	FMR1 neighbor [Source:HGNC Symbol;Acc:HGNC:26372]	0	0	0	0.0155828	0	0	0.257105	0.175667	0.203672	Promoter (1-2kb)	23	147062849	147108187	45339	-1492
159989	ENSG00000165325	DEUP1	37.9816	9.47545	1.29776	7.30139	711.86	2.84802e-13	3.45506e-12	protein_coding	HGNC Symbol	12	deuterosome assembly protein 1 [Source:HGNC Symbol;Acc:HGNC:26344]	0	0	0	0.0311655	0.0264726	0.0408799	0.652651	1.20039	1.27295	Promoter (<=1kb)	11	93063156	93148366	85211	-546
160419	ENSG00000165805	C12orf50	4.69228	3.92202	1.65214	2.3739	15.1581	0.0176011	0.0363303	protein_coding	HGNC Symbol	5	chromosome 12 open reading frame 50 [Source:HGNC Symbol;Acc:HGNC:26665]	0.0461281	0	0	0.0155828	0	0	0.0395546	0.0585556	0.25459	Promoter (2-3kb)	12	88373816	88423176	49361	-2743
161176	ENSG00000176438	SYNE3	792.412	-1.62952	0.179301	-9.0882	0.323196	1.00696e-19	2.56837e-18	protein_coding	HGNC Symbol	5	spectrin repeat containing nuclear envelope family member 3 [Source:HGNC Symbol;Acc:HGNC:19861]	33.4121	31.2172	28.2552	46.2496	55.341	47.482	7.08027	4.12817	5.57553	Promoter (2-3kb)	14	95883831	95942173	58343	2478
162681	ENSG00000166845	C18orf54	443.735	-1.38956	0.202678	-6.85602	0.381681	7.08079e-12	7.26024e-11	protein_coding	HGNC Symbol	7	chromosome 18 open reading frame 54 [Source:HGNC Symbol;Acc:HGNC:13796]	19.6813	16.3698	13.7713	6.21752	4.91067	3.39303	3.95546	3.60117	3.00417	Promoter (<=1kb)	18	51885144	51908404	23261	869
166979	ENSG00000164287	CDC20B	10.6719	5.78786	1.2755	4.53772	55.2484	5.68644e-06	2.48948e-05	protein_coding	HGNC Symbol	5	cell division cycle 20B [Source:HGNC Symbol;Acc:HGNC:24222]	0.0307521	0	0	0.0311655	0	0.1022	0.435101	0.234222	0.25459	Promoter (2-3kb)	5	54431602	54469005	37404	-2010
168090	ENSG00000112539	C6orf118	2.99135	5.78964	2.00431	2.8886	55.3167	0.00386964	0.0095325	protein_coding	HGNC Symbol	3	chromosome 6 open reading frame 118 [Source:HGNC Symbol;Acc:HGNC:21233]	0	0	0	0	0.0132363	0.0817598	0.0197773	0.117111	0.101836	Promoter (<=1kb)	6	165693153	165723111	29959	-916
203238	ENSG00000164989	CCDC171	33.4921	-2.4813	0.593378	-4.18166	0.179082	2.8939e-05	0.000110753	protein_coding	HGNC Symbol	9	coiled-coil domain containing 171 [Source:HGNC Symbol;Acc:HGNC:29828]	1.87588	1.47328	1.02346	0.327238	0.317671	0.286159	0.0791092	0.234222	0.127295	Promoter (<=1kb)	9	15563976	15971897	407922	-711
203238	ENSG00000164989	CCDC171	33.4921	-2.4813	0.593378	-4.18166	0.179082	2.8939e-05	0.000110753	protein_coding	HGNC Symbol	9	coiled-coil domain containing 171 [Source:HGNC Symbol;Acc:HGNC:29828]	1.87588	1.47328	1.02346	0.327238	0.317671	0.286159	0.0791092	0.234222	0.127295	Promoter (1-2kb)	9	15563976	15971897	407922	-1929
204219	ENSG00000154227	CERS3	4.2797	6.33052	1.68576	3.75529	80.4781	0.000173143	0.000565418	protein_coding	HGNC Symbol	8	ceramide synthase 3 [Source:HGNC Symbol;Acc:HGNC:23752]	0	0	0	0.0155828	0.0529452	0.0408799	0.118664	0.117111	0.127295	Promoter (2-3kb)	15	100940600	101084476	143877	2653
245711	ENSG00000163806	SPDYA	47.7913	4.55272	0.645658	7.05128	23.4696	1.77278e-12	1.96489e-11	protein_coding	HGNC Symbol	7	speedy/RINGO cell cycle regulator family member A [Source:HGNC Symbol;Acc:HGNC:30613]	0.015376	0.180068	0.103641	0.264907	0.370617	0.16352	0.870201	1.52245	1.40025	Promoter (2-3kb)	2	29038863	29063675	24813	2012
253559	ENSG00000175161	CADM2	8.90404	4.11379	1.05321	3.90593	17.313	9.38628e-05	0.000325135	protein_coding	HGNC Symbol	5	cell adhesion molecule 2 [Source:HGNC Symbol;Acc:HGNC:29849]	0.0461281	0.0327396	0	0.28049	0.330908	0.24528	0.355991	0.234222	0.152754	Promoter (1-2kb)	3	85775632	86123579	347948	1966
255928	ENSG00000143469	SYT14	26.4266	1.74053	0.512847	3.39386	3.34158	0.000689146	0.00200352	protein_coding	HGNC Symbol	10	synaptotagmin 14 [Source:HGNC Symbol;Acc:HGNC:23143]	0.215265	0.327396	0.388655	0.716807	0.727997	0.408799	0.573542	0.468445	0.687394	Promoter (1-2kb)	1	210332745	210337633	4889	1532
257144	ENSG00000174500	GCSAM	5.89231	2.55515	1.05327	2.42593	5.87728	0.0152693	0.0320241	protein_coding	HGNC Symbol	7	germinal center associated signaling and motility [Source:HGNC Symbol;Acc:HGNC:20253]	0.0615042	0.0327396	0.0388655	0.28049	0.132363	0.0817598	0.138441	0.0585556	0.229131	Promoter (<=1kb)	3	111839688	111852152	12465	-426
261729	ENSG00000157214	STEAP2	70.4913	-3.09063	0.741797	-4.16641	0.117389	3.0943e-05	0.000117438	protein_coding	HGNC Symbol	10	STEAP2 metalloreductase [Source:HGNC Symbol;Acc:HGNC:17885]	6.79621	1.88252	1.33438	0.701224	0.622106	0.490559	0.51421	0.0585556	0.101836	Promoter (<=1kb)	7	89843134	89866992	23859	386
283383	ENSG00000111452	ADGRD1	4.03978	3.82638	1.54661	2.47404	14.1859	0.0133593	0.0284766	protein_coding	HGNC Symbol	16	adhesion G protein-coupled receptor D1 [Source:HGNC Symbol;Acc:HGNC:19893]	0	0	0.0388655	0.0155828	0.0132363	0	0.177996	0.0585556	0.101836	Promoter (<=1kb)	12	131555398	131626008	70611	-596
283987	ENSG00000167861	HID1	1734.83	-3.55505	0.219739	-16.1785	0.0850794	7.15334e-59	1.72795e-56	protein_coding	HGNC Symbol	14	HID1 domain containing [Source:HGNC Symbol;Acc:HGNC:15736]	97.6994	76.0049	74.7254	10.0509	9.63603	5.43703	6.0123	2.83995	3.13146	Promoter (1-2kb)	17	72946839	72968900	22062	1735
286151	ENSG00000156509	FBXO43	13.5576	-4.49894	1.19397	-3.76805	0.0442265	0.000164527	0.000541153	protein_coding	HGNC Symbol	3	F-box protein 43 [Source:HGNC Symbol;Acc:HGNC:28521]	0.691922	0.671161	0.634803	0.0934965	0.0794178	0	0	0	0.0509181	Promoter (<=1kb)	8	101145588	101158099	12512	848
317649	ENSG00000163412	EIF4E3	331.534	-1.63097	0.222664	-7.32482	0.32287	2.39221e-13	2.95446e-12	protein_coding	HGNC Symbol	10	eukaryotic translation initiation factor 4E family member 3 [Source:HGNC Symbol;Acc:HGNC:31837]	16.2217	11.3443	11.3617	4.26967	3.37526	1.8396	2.55127	2.16656	2.24039	Promoter (<=1kb)	3	71728440	71778269	49830	0
345193	ENSG00000183423	LRIT3	11.7843	5.854	1.32499	4.41815	57.8403	9.95479e-06	4.17989e-05	protein_coding	HGNC Symbol	2	leucine rich repeat, Ig-like and transmembrane domains 3 [Source:HGNC Symbol;Acc:HGNC:24783]	0	0.0327396	0	0.155828	0.10589	0	0.197773	0.527	0.229131	Promoter (2-3kb)	4	110769340	110793471	24132	-2924
389337	ENSG00000183111	ARHGEF37	299.099	-2.44349	0.279501	-8.74233	0.183838	2.28355e-18	4.92252e-17	protein_coding	HGNC Symbol	3	Rho guanine nucleotide exchange factor 37 [Source:HGNC Symbol;Acc:HGNC:34430]	13.2695	15.2894	10.6491	5.92145	5.38718	4.59899	2.01729	0.819778	1.22203	Promoter (<=1kb)	5	148961135	149014527	53393	-485
389692	ENSG00000182759	MAFA	9.27564	2.37115	1.02119	2.32194	5.17353	0.0202361	0.0409258	protein_coding	HGNC Symbol	2	MAF bZIP transcription factor A [Source:HGNC Symbol;Acc:HGNC:23145]	0.0922563	0.0982187	0.0388655	0.233741	0.145599	0.12264	0.0395546	0.351334	0.229131	Promoter (2-3kb)	8	144510230	144512602	2373	2727
440073	ENSG00000120645	IQSEC3	10.5133	5.73068	1.50985	3.79553	53.1014	0.000147328	0.000489484	protein_coding	HGNC Symbol	5	IQ motif and Sec7 domain 3 [Source:HGNC Symbol;Acc:HGNC:29193]	0.0307521	0	0	0.062331	0.185308	0	0.118664	0.644112	0.0763771	Promoter (1-2kb)	12	176049	287625	111577	1003
440073	ENSG00000120645	IQSEC3	10.5133	5.73068	1.50985	3.79553	53.1014	0.000147328	0.000489484	protein_coding	HGNC Symbol	5	IQ motif and Sec7 domain 3 [Source:HGNC Symbol;Acc:HGNC:29193]	0.0307521	0	0	0.062331	0.185308	0	0.118664	0.644112	0.0763771	Promoter (1-2kb)	12	176049	287625	111577	-1749
440279	ENSG00000137766	UNC13C	18.955	8.46917	1.34145	6.31345	354.383	2.72883e-10	2.28227e-09	protein_coding	HGNC Symbol	6	unc-13 homolog C [Source:HGNC Symbol;Acc:HGNC:23149]	0	0	0	0.0467483	0.0397089	0.0817598	0.395546	0.673389	0.509181	Promoter (<=1kb)	15	54556343	54709268	152926	0
440279	ENSG00000137766	UNC13C	18.955	8.46917	1.34145	6.31345	354.383	2.72883e-10	2.28227e-09	protein_coding	HGNC Symbol	6	unc-13 homolog C [Source:HGNC Symbol;Acc:HGNC:23149]	0	0	0	0.0467483	0.0397089	0.0817598	0.395546	0.673389	0.509181	Promoter (1-2kb)	15	54305101	54920806	615706	1063
440279	ENSG00000137766	UNC13C	18.955	8.46917	1.34145	6.31345	354.383	2.72883e-10	2.28227e-09	protein_coding	HGNC Symbol	6	unc-13 homolog C [Source:HGNC Symbol;Acc:HGNC:23149]	0	0	0	0.0467483	0.0397089	0.0817598	0.395546	0.673389	0.509181	Promoter (<=1kb)	15	54901540	54920806	19267	220
441250	ENSG00000277149	TYW1B	63.6776	1.35618	0.46493	2.91694	2.56006	0.0035348	0.00876814	protein_coding	HGNC Symbol	3	tRNA-yW synthesizing protein 1 homolog B [Source:HGNC Symbol;Acc:HGNC:33908]	0.81493	0.949447	0.971637	0.763555	0.979487	0.531439	0.672428	1.581	1.50208	Promoter (<=1kb)	7	72039492	72209725	170234	461
